# Supplementary material for: A major pleiotropic QTL identified for yield components and nitrogen content in rice (Oryza sativa L.) under differential nitrogen field conditions
Source: PLoS One. 2020 Oct 20;15(10):e0240854. doi: 10.1371/journal.pone.0240854 (PMC7575116; doi:10.1371/journal.pone.0240854)
Supplement: S2 Table — A. Details of soil properties of the experimental plot. B. Details of weather parameters during the experiement. (XLSX) [file pone.0240854.s002.xlsx]

## Sheet: S2A Table_Soil properties
	S2A Table. Details of soil properties of the experimental plot
S.No	Soil property (Before start of the season)	Wet Season 2011		Wet Season 2014		Dry Season 2015
		Low Nitrogen	Recommended Nitrogen	Low Nitrogen	Recommended Nitrogen	Low Nitrogen	Recommended Nitrogen
1	pH	7.2	7.29	7.34	7.64	7.32	7.44
2	Electrical conductivity (dS/m)	0.22	0.24	0.32	0.34	0.26	0.28
3	Organic Carbon %	0.58	0.69	0.68	0.75	0.66	0.73
4	Available N Kg/ha	202	220	220	231	222	244
5	Available P205 Kg/ha	56	60	40	56	53	60
6	Available K2O	628	682	743	704	699	721

## Sheet: S2B Table_Weather parameters
S2B Table. Details of weather parameters during the experiement
Wet Season 2011	TEMPERATURE (oC)			Relative humidity (%)		TOTAL RAINFALL	TOTAL RAINYDAYS	SUNSHINE	WINDSPEED	EVAPORATION
MONTH	MAX.	MIN.	MEAN	I	II	(mm)		(hrs.)	(km/hr)	(mm)
JUNE	34.9933	24.36	29.6767	74.2667	44.7333	40.7	4	6.12667	14.7467	6.05667
JULY	31.2067	22.6533	26.93	86.3333	62	191	11	4.79667	11.51	4.83
AUGUST	30.1667	22.7167	26.4417	89.7	71.1	147.3	9	3.88	9.09	4.44667
SEPTEMBER	30.7167	21.9567	26.3367	87.7	74.2333	68.1	5	5.51724	5.44667	2.78333
OCTOBER	32.09	20.25	26.17	90.0667	69.3667	47.9	4	6.60667	2.5129	2.71667
NOVEMBER	30.1067	15.3933	22.75	81.8333	44.9	27.5	1	8.18333	2.96	2.40333
DECEMBER	29.9355	12.63	21.265	83.3667	40.2581	0	0	8.53333	2.04	2.26667
Wet Season 2014	TEMPERATURE (oC)			Relative humidity (%)		TOTAL RAINFALL	TOTAL RAINYDAYS	SUNSHINE	WINDSPEED	EVAPORATION
MONTH	MAX.	MIN.	MEAN	I	II	(mm)		(hrs.)	(km/hr)	(mm)
JUNE	37.0167	24.5967	32.4	68.5667	45.0667	53.6	3	7.89667	10.1733	8.13667
JULY	31.7742	23.6323	28.8	82.3226	62.3871	108	8	3.19355	12.4355	4.00323
AUGUST	32.2167	23.3333	27.15	85.4333	61.9667	184.1	10	5.58	7.10333	3.01667
SEPTEMBER	30.27	22.6	27.1	87.4333	60.7667	60.6	7	5.1	5.15667	2.99667
OCTOBER	31.6129	20.35	31.3	83.4516	50.4667	69.2	3	6.39677	2.35806	4.80323
NOVEMBER	29.7	15.94	21.19	84.8	41.7	31	2	6.66	1.71667	2.68667
DECEMBER	27.9	12.67	19.0516	84.3	37.5	0	0	8.87097	1.74839	2.7
Dry Season 2015	TEMPERATURE (oC)			Relative humidity (%)		TOTAL RAINFALL	TOTAL RAINYDAYS	SUNSHINE	WINDSPEED	EVAPORATION
MONTH	MAX.	MIN.	MEAN	I	II	(mm)		(hrs.)	(km/hr)	(mm)
JANUARY	28.3742	10.8065	19.5903	75.6129	33.4516	0	0	8.64194	1.78387	3.97419
FEBRAURY	32.1964	15.0464	23.6214	69.7857	23.0357	0	0	9.86429	2.17143	5.43571
MARCH	33.7387	19.6677	26.7032	66.4194	33.6774	41.6	4	7.54516	2.05806	5.81935
APRIL	35.2167	22.85	29.0333	76.6667	38.8333	117.5	5	8.44	1.92667	5.72
MAY	39.3387	26.7258	33.0323	64.3226	30.0645	13.8	2	8.50645	3.53871	8.07097
JUNE	33.53	24.9233	29.2267	78.4667	53.6	160	8	4.85	7.56333	5.88667
