# Supplementary material for: A major pleiotropic QTL identified for yield components and nitrogen content in rice (Oryza sativa L.) under differential nitrogen field conditions
Source: PLoS One. 2020 Oct 20;15(10):e0240854. doi: 10.1371/journal.pone.0240854 (PMC7575116; doi:10.1371/journal.pone.0240854)
Supplement: S3 Table — WS: Wet season, DS: Dry season, P: Parent. (XLSX) [file pone.0240854.s003.xlsx]

## Sheet: S3 Table
S3 Table. Details of 54 genotypes and parents screend under LN and RN during 2014 (WS) and 2015 (DS)
SNO	Genotype	RM13181	RM13201	RM13209	Panicle weight(g/plant)_WS	Panicle number/plant_WS	Grain yield (g/plant)_WS	Straw weight(g/plant)_WS	Total dry matter(g/plant)_WS	Panicle weight(g/plant)_DS	Panicle number/plant_DS	Grain yield (g/plant)_DS	Straw weight(g/plant)_DS	Total dry matter(g/plant)_DS
1	GQ-25	280	480	270	20.1706	6.6	15.7385	19.968	40.1386	9.986	4	8.538	10.872	20.858
2	ICRD19-9-2-1	280	480	270	16.785	9	14.0305	14.95	31.735	8.322	9.8	7.616	14.064	22.386
3	IR 64	280	480	270	8.03169	6	7.18892	8.52	16.5517	4.488	6.6	3.888	5.808	10.296
4	IR 82635-B-B-93-2	260	470	260	4.1941	5.4	2.432	6	10.1941	2.84	2.2	2.6	8.896	11.736
5	IR 82639-B-B-103-4	260	470	260	15.459	4.2	8.81	10.944	26.403	8.04	7.6	5.94	5.668	13.708
6	IR55178	260	470	260	6.74215	6.6	5.43231	6.86	13.6022	6.11	6	5.616	10.88	16.99
7	IR82310-B-B-67-2	Null Allele	Null Allele	Null Allele	3.03616	6.4	0.256	11.56	14.5962	5.94	5.2	1.76	8.13	14.07
8	Basmati 370	260	470	260	23.4188	14.4	19.4954	22.084	45.5028	9.56	6.8	8.56	20.172	29.732
9	Ratnasundari	280	480	270	1.67031	6.6	0.489923	7.62	9.29031	5.58	3.2	3.24	8.318	13.898
10	BISHUBHOG	260	470	260	5.98	2.6	5.33	8.372	14.352	5.14	3.6	4.34	5.586	10.726
11	IC-576901	260	470	260	5.3775	3	4.4625	4.998	10.3755	5.46	4.6	4.84	6.01	11.47
12	IC-463018	260	470	260	2.57833	2.6	2.57833	3.89	6.46833	2.76	5	1.58	5.98	8.74
13	IC-576898	Null Allele	480	Null Allele	1.81382	5.8	0.87	10.16	11.9738	2.2	8	1.22	5.044	7.244
14	IC-462256	280	480	270	5.52933	4.4	4.928	4.352	9.88133	3.62	5.6	2.74	6.012	9.632
15	IC-576938	260	470	260	7.5	2.2	4.29733	4.5	6.95	6.2	4.5	3.96	8	13.2
16	IC-462271	260	470	260	1.47953	4.8	0.793412	5.88	7.35953	9.62	7	8.66	5.834	15.454
17	IC-462284	280	480	270	15.0187	4.4	0.859467	5.16	20.1787	5.2	4.4	4.36	7.93	13.13
18	IC-576984	260	470	260	17.9761	12.8	16.0561	-	-	2.62	5.2	1.96	4.34	6.96
19	IC-463222	260	470	260	21.232	1.6	18.72	2.484	23.716	4.44	6.8	3.98	3.176	7.616
20	IC-463254	280	480	270	22.7923	10.6	18.1652	17.734	40.5263	12.28	8.2	11.16	5.608	17.888
21	IR 83754-B-B-46-4	260	470	260	7.67077	4	6.52308	3.632	11.3028	3.02	2.8	2.62	4.944	7.964
22	IR 83384-B-B-102-3	260	470	260	11.4792	3.8	11.59	4.124	15.6032	5.84	4.2	5.14	6.584	12.424
23	IR 82590-B-B-98-2	270	460	255	9.95385	4	8.57231	4.27	14.2238	6.82	5.4	5.9	25.92	32.74
24	IR 82589-B-B-36-2	260	470	260	3.11333	2	2.52667	3.612	6.72533	1.3	0.8	1.18	7.446	8.746
25	IR 82635-B-B-59-2	260	470	260	7.17382	3.6	6.16255	4.94	12.1138	9.16	6.2	7.54	6.48	15.64
26	CT 15673-8-4-7-1-4-M	260	470	260	1.652	2.8	0.868	8.6	10.252	6.46	4.6	5.8	7.828	14.288
27	SOMALY2-023-3-5-1-2-1	260	470	260	4.9402	3.4	3.536	11.62	16.5602	3.8124	5.4	2.322	12.04	15.8524
28	IR 79915-B-83-4-3	260	470	260	7.12923	4	6	3.87	10.9992	4.54	4.4	3.64	3.69	8.23
29	IR 78937-B-4-B-B-B	260	470	260	9.801	4.2	8.55	4.18	13.981	7.5	5.6	6.7	8.266	15.766
30	NCR 606	260	470	260	3.73033	3.8	3.002	4.284	8.12633	2.74	9	2.18	4.992	7.732
31	YANGKUM(RED)	280	480	270	13.4625	5.2	11.3907	4.894	22.4785	4.3	6	3.14	10.544	14.844
32	DJOGOLON-DJOGOLON	280	480	270	13.5526	6.4	11.8426	-	20.4786	7.8	13.2	6.06	5.208	13.008
33	IR88634:11-B-1	280	480	270	15.8516	6.8	13.9879	7.078	24.5276	-	-	-	5.628	5.628
34	IR88633:5-54-B-1	280	480	270	6.524	2.8	5.324	5.788	15.382	13.446	9	12.238	6.154	19.6
35	N 22	260	470	260	7.22775	4.6	6.18125	6.216	12.2477	11.7	9	10.9	6.374	18.074
36	ZARDROME (ACC 32379)	280	480	270	4.22348	6	3.64174	3.282	8.73748	5.8	4.8	5.1	18.1	23.9
37	IR 1561-228-3-3	260	470	260	18.216	9.2	16.1826	4.638	28.134	3.2	2.8	2.9	5.532	8.732
38	DOMSIAH (ACC 32294)	260	470	260	9.62326	6.8	8.58815	4.866	16.9113	9.224	6.4	8.15	11.564	20.788
39	Vibhava	280	Null Allele	270	4.37373	5.8	3.47736	5.2	9.57373	4.82	7	4.16	8.258	13.078
40	Rpbio 226	260	470	260	4.99062	6.6	3.86354	5.372	10.3626	3.74	11	2.94	4.884	8.624
41	Dhanarasi	270	460	255	1.184	5.6	0.56	9.62	10.804	7.48	6.8	6.32	6.82	14.3
42	Nidhi	260	470	260	7.35807	7.4	5.846	8.544	15.9021	12.56	11	9.92	6.378	18.938
43	Suraksha	280	480	270	3.46111	5	2.725	7.07	10.5311	8.18	8.4	7.26	8.158	16.338
44	Vardhan	270	460	255	5.39444	5	4.55556	5.742	11.1364	13.4028	7.2	12.454	9.052	22.4548
45	MTU 1010	260	470	260	6.07125	3	5.175	5.228	11.2993	-	-	-	5.276	5.276
46	Sabita	260	470	260	10.137	6.8	8.72415	10.556	20.693	-	-	-	-	-
47	Anjali	280	480	270	6.9425	7	6	4.338	11.2805	8.784	5.6	8.05	3.77	12.554
48	Pooja	270	460	255	1.33943	11.2	0.338286	9.8	11.1394	3.16	6	2.52	5.578	8.738
49	Rasi	270	460	255	15.0196	12.2	13.3545	7.656	22.6756	12.8	7.8	11.24	4.854	17.654
50	Dehradun Basmati	260	470	260	30.3858	14.2	27.0688	12.624	43.0098	3.76	5.8	2.9	5.156	8.916
51	Kola Joha 3	270	460	255	1.004	2.8	0.476	3.718	4.722	8.04	4.6	7.38	5.472	13.512
52	Kali Kamod	260	470	260	7.76087	6	6.69652	7.006	14.7669	4	6.2	3.26	3.412	7.412
53	PSBRC80	280	480	270	3.04993	6.8	0.957037	7.374	10.4239	3.252	6.6	1.556	13.574	16.826
54	UPRI-92-133	280	480	270	20.4209	10	16	8.88	29.3009	7.658	8	6.832	8.042	15.7
P	BPT5204	260	470	260	1.1625	3	0.82875	8.62	9.7825	5.288	5.2	4.486	12	17.288
P	PTB1	270	480	255	11.3	6	8.7	18.8	30.1	13.55	5.2	8.486	15.98	29.53
	WS: Wet season, DS: Dry season, P: Parent
