# Supplementary material for: A major pleiotropic QTL identified for yield components and nitrogen content in rice (Oryza sativa L.) under differential nitrogen field conditions
Source: PLoS One. 2020 Oct 20;15(10):e0240854. doi: 10.1371/journal.pone.0240854 (PMC7575116; doi:10.1371/journal.pone.0240854)
Supplement: S4 Table — (XLSX) [file pone.0240854.s004.xlsx]

## Sheet: S4 Table 
S4 Table. Details of SSRs used for parental polymorphism survey, polymorphic between the parents, for selective genotyping, for local linkage map and total polymorphic
SNO	254 SSRs for Parental polymorphism	Chromosome		SNO	Polymorphic SSRs between BPT5204 and PTB1	Chromosome		SNO	32 SSRs for selective genotyping	Chromosome						SNO	Final 41 polymorphic SSRs for analysis	Chromosome
1	RM495	1		1	RM495	1		1	RM495	1						1	RM495	1
2	RM10018	1		2	RM10090	1		2	RM10090	1						2	RM10090	1
3	RM10090	1		3	RM1167	1		3	RM1167	1						3	RM1167	1
4	RM1167	1		4	RM1	1		4	RM1	1						4	RM1	1
5	RM1	1		5	RM283	1		5	RM283	1						5	RM283	1
6	RM283	1		6	RM7075	1		6	RM7075	1						6	RM5641	1
7	RM10361	1		7	RM11307	1		7	RM11307	1						7	RM10890	1
8	RM259	1		8	RM5	1		8	RM5	1						8	RM7075	1
9	RM10782	1		9	RM9	1		9	RM9	1						9	RM10916	1
10	RM7075	1		10	RM12276	1		10	RM12276	1						10	RM11307	1
11	RM10936	1		11	RM279	2		11	RM279	2		SNO	9 polymorphic SSRs from saturation with 43 SSRs	Chromosome		11	RM5	1
12	RM9	1		12	RM12568	2		12	RM12568	2		1	RM5641	1		12	RM11258	1
13	RM11307	1		13	RM13021	2		13	RM13021	2		2	RM10890	1		13	RM6716	1
14	RM5	1		14	RM13181	2		14	RM13181	2		3	RM10916	1		14	RM9	1
15	RM11321	1		15	RM1178	2		15	RM13197	2		4	RM11258	1		15	RM12276	1
16	RM237	1		16	RM13197	2		16	RM3763	2		5	RM6716	1		16	RM279	2
17	RM11570	1		17	RM3763	2		17	RM14250	3		6	RM13034	2		17	RM12568	2
18	RM11739	1		18	RM14250	3		18	RM15855	3		7	RM6374	2		18	RM13021	2
19	RM3285	1		19	RM15855	3		19	RM17201	4		8	RM13201	2		19	RM13034	2
20	RM312	1		20	RM17201	4		20	RM19341	6		9	RM13209	2		20	RM6374	2
21	RM11850	1		21	RM19341	6		21	RM20350	6						21	RM13181	2
22	RM3738	1		22	RM20350	6		22	RM20746	6						22	RM13201	2
23	RM11997	1		23	RM20746	6		23	RM20967	7						23	RM13197	2
24	RM431	1		24	RM20967	7		24	RM5543	7						24	RM13209	2
25	RM12276	1		25	RM5543	7		25	RM7110	7						25	RM3763	2
26	RM12311	2		26	RM7110	7		26	RM5455	7						26	RM14250	3
27	RM12349	2		27	RM5455	7		27	RM22524	8						27	RM15855	3
28	RM12469	2		28	RM22524	8		28	RM1189	9						28	RM17201	4
29	RM279	2		29	RM1189	9		29	RM24829	9						29	RM19341	6
30	RM12568	2		30	RM24829	9		30	RM171	10						30	RM20350	6
31	RM12690	2		31	RM171	10		31	RM287	11						31	RM20746	6
32	RM12731	2		32	RM287	11		32	RM1159	12						32	RM20967	7
33	RM13021	2		33	RM1159	12										33	RM5543	7
34	RM13075	2		34	RM16913	4										34	RM7110	7
35	RM1178	2		35	RM162	6										35	RM5455	7
36	RM13154	2		36	RM1024	5										36	RM22524	8
37	RM13197	2		37	RM22054	7										37	RM1189	9
38	RM13181	2		38	RM517	3										38	RM24829	9
39	RM13347	2		39	RM23914	9										39	RM171	10
40	RM13611	2		40	RM24952	10										40	RM287	11
41	RM3763	2		41	RM124	4										41	RM1159	12
42	RM13867	2		42	RM2	7
43	RM14001	2
44	RM14212	2
45	RM14140	2
46	RM6307	2
47	RM14250	3
48	RM14598	3
49	RM517	3
50	RM251	3
51	RM5748	3
52	RM15337	3
53	RM15372	3
54	RM15626	3
55	RM15630	3
56	RM15679	3
57	RM15721	3
58	RM15855	3
59	RM15933	3
60	RM16097	3
61	RM16215	3
62	RM85	3
63	RM16263	4
64	RM16291	4
65	RM16294	4
66	RM16343	4
67	RM16368	4
68	RM16493	4
69	RM16592	4
70	RM16592	4
71	RM16630	4
72	RM16643	4
73	RM16705	4
74	RM16757	4
75	RM16801	4
76	RM16913	4
77	RM1359	4
78	RM16960	4
79	RM17115	4
80	RM17201	4
81	RM17294	4
82	RM17604	4
83	RM124	4
84	RM507	5
85	RM17728	5
86	RM1024	5
87	RM169	5
88	RM7588	5
89	RM18222	5
90	RM18270	5
91	RM18337	5
92	RM5140	5
93	RM18451	5
94	RM18614	5
95	RM18704	5
96	RM18770	5
97	RM18833	5
98	RM188	5
99	RM18857	5
100	RM18939	5
101	RM3486	5
102	RM19016	5
103	RM19208	5
104	RM5818	5
105	RM190	6
106	RM19341	6
107	RM19620	6
108	RM19697	6
109	RM3431	6
110	RM19764	6
111	RM19926	6
112	RM19981	6
113	RM19983	6
114	RM20071	6
115	RM20350	6
116	RM162	6
117	RM20537	6
118	RM20583	6
119	RM20615	6
120	RM20625	6
121	RM20672	6
122	RM20676	6
123	RM20746	6
124	RM20882	7
125	RM20948	7
126	RM20967	7
127	RM21097	7
128	RM8006	7
129	RM2	7
130	RM21330	7
131	RM5543	7
132	RM21518	7
133	RM21539	7
134	RM21662	7
135	RM21679	7
136	RM21693	7
137	RM21831	7
138	RM234	7
139	RM542	7
140	RM22054	7
141	RM5455	7
142	RM22167	7
143	RM7110	7
144	RM12142	7
145	RM1381	8
146	RM22299	8
147	RM22291	8
148	RM22418	8
149	RM22524	8
150	RM22692	8
151	RM22701	8
152	RM22710	8
153	RM22732	8
154	RM22883	8
155	RM22885	8
156	RM22892	8
157	RM22977	8
158	RM23001	8
159	RM23146	8
160	RM210	8
161	RM23556	8
162	RM23578	8
163	RM477	8
164	RM23669	9
165	RM23742	9
166	RM23901	9
167	RM23901	9
168	RM23906	9
169	RM23914	9
170	RM219	9
171	RM24017	9
172	RM24035	9
173	RM24085	9
174	RM24199	9
175	RM24217	9
176	RM24271	9
177	RM1189	9
178	RM24516	9
179	RM6543	9
180	RM160	9
181	RM24740	9
182	RM24829	9
183	RM1026	9
184	RM6797	9
185	RM24849	10
186	RM5095	10
187	RM474	10
188	RM24941	10
189	RM24952	10
190	RM6404	10
191	RM271	10
192	RM25104	10
193	RM25151	10
194	RM239	10
195	RM25355	10
196	RM25365	10
197	RM25367	10
198	RM1375	10
199	RM25663	10
200	RM3510	10
201	RM171	10
202	RM25754	10
203	RM25786	10
204	RM484	10
205	RM25794	10
206	RM25865	10
207	RM25930	10
208	RM590	10
209	RM286	11
210	RM26001	11
211	RM26062	11
212	RM26213	11
213	RM552	11
214	RM116	11
215	RM26329	11
216	RM536	11
217	RM26402	11
218	RM26513	11
219	RM26643	11
220	RM287	11
221	RM26796	11
222	RM26797	11
223	RM26829	11
224	RM206	11
225	RM26999	11
226	RM27073	11
227	RM27172	11
228	RM27183	11
229	RM27258	11
230	RM27289	11
231	RM144	11
232	RM27387	11
233	RM27440	12
234	RM19	12
235	RM3747	12
236	RM27564	12
237	RM27877	12
238	RM27962	12
239	RM27973	12
240	RM513	12
241	RM28118	12
242	RM28130	12
243	RM28157	12
244	RM28202	12
245	RM6022	12
246	RM28304	12
247	RM 28404	12
248	RM277	12
249	RM28580	12
250	RM 28607	12
251	RM1159	12
252	RM28806	12
253	RM5313	12
254	RM1227	12
