# Supplementary material for: A major pleiotropic QTL identified for yield components and nitrogen content in rice (Oryza sativa L.) under differential nitrogen field conditions
Source: PLoS One. 2020 Oct 20;15(10):e0240854. doi: 10.1371/journal.pone.0240854 (PMC7575116; doi:10.1371/journal.pone.0240854)
Supplement: S5 Table — WS: Wet season, DS: Dry season. (XLSX) [file pone.0240854.s005.xlsx]

## Sheet: S5 Table
S5 Table. Details of Analysis of variance for parents (BPT5204 and PTB1)
Trait	Season
		Mean sum of squares
		Genotype	Treatment	Genotype
				X Treatment
SPAD	WS	8.7*	389.9***	36.1***
Leaf length (cm)	WS	1.02NS	63.02***	17.52***
Leaf width (cm)	WS	0.27***	0.12***	0.00333NS
Leaf area (cm2)	WS	111.63***	182.52***	12***
Grain yield (g/plant)	WS	125.94***	180.85***	55.06**
Hundred seed weight (g)	WS	2.1845***	0.0065NS	0.0065NS
Grain number/plant	WS	24934NS	654734***	52669NS
Total dry matter (g/plant)	WS	319.6***	277.7***	74.7**
Plant height (cm)	WS	4294***	200***	61*
Tiller number	WS	5.33NS	261.33***	5.33NS
Panicle number/plant	WS	27NS	225.33***	21.33NS
Days to 50% flowering	WS	507***	363***	192***
Nitrogen% in grain	WS	0.0374NS	0.5941***	0.0007NS
Nitrogen% in straw	WS	0.0363*	0.4332***	0.0096NS
Grain nitrogen/plant	WS	0.02755**	0.05427***	0.01367*
Straw nitrogen /plant	WS	2.0717***	1.6266***	2.1726***
Nitrogen Harvest Index (%)	WS	4.48NS	46.77NS	8.15NS
SPAD	DS	29.453***	1.763NS	0.003NS
Leaf length (cm)	DS	16.567***	14.741***	4.688**
Leaf width (cm)	DS	0.04083***	0.14083***	0.00083NS
Leaf area (cm2)	DS	114NS	78.69***	3.93**
Grain yield (g/plant)	DS	51.2**	565.7***	131.9***
Hundred seed weight (g)	DS	2.1252***	0.052**	0.05NS
Grain number/plant	DS	33602NS	1818187***	143227*
Total dry matter (g/plant)	DS	94.5**	909.7***	10.3NS
Plant height (cm)	DS	8008***	1728***	432***
Tiller number	DS	16.33*	40.33**	12*
Panicle number/plant	DS	18.75*	44.08**	14.08*
Days to 50% flowering	DS	330.8***	126.7***	36.8***
Nitrogen% in grain	DS	0.9352***	0.3104***	0.122**
Nitrogen% in straw	DS	0.33**	0.5002***	0.0817*
Grain nitrogen/plant	DS	0.00333NS	0.07053***	0.0192***
Straw nitrogen /plant	DS	0.04563***	0.01203*	0.0075*
Nitrogen Harvest Index (%)	DS	4.36NS	219.22*	10.18NS
Relative grain yield	WS	477NS	-	-
(RGY)
Relative biomass yield	WS	2706.8**	-	-
(RBM)
Relative grain nitrogen	WS	33.51NS	-	-
(RGN)
Relative biomass nitrogen (RBN)	WS	35.72NS	-	-
Physiological nitrogen use efficiency	WS	3207**	-	-
(PNUE)
Agronomic nitrogen use efficiency	WS	1942.6*	-	-
(ANUE)
Agrophysiological efficiency (APNUE)	WS	669.1NS	-	-
Relative grain yield	DS	1359.9***	-	-
(RGY)
Relative biomass yield	DS	642.5NS	-	-
(RBM)
Relative grain nitrogen	DS	2293.2***	-	-
(RGN)
Relative biomass nitrogen (RBN)	DS	2184.3*	-	-
Physiological nitrogen use efficiency	DS	95.07NS	-	-
(PNUE)
Agronomic nitrogen use efficiency	DS	4655**	-	-
(ANUE)
Agrophysiological efficiency (APNUE)	DS	3397**	-	-
WS: Wet season, DS: Dry season
