# Supplementary material for: A major pleiotropic QTL identified for yield components and nitrogen content in rice (Oryza sativa L.) under differential nitrogen field conditions
Source: PLoS One. 2020 Oct 20;15(10):e0240854. doi: 10.1371/journal.pone.0240854 (PMC7575116; doi:10.1371/journal.pone.0240854)
Supplement: S7 Table — A. Path coefficient analysis of morpho physiological, agronomic and yield traits under low nitrogen in wet season. SPAD: SPAD value, LL: Leaf length (cm), LW: Leaf width (cm), LA: Leaf area (cm), DFF: Days to 50% flowering, PH: Plant height (cm), TNO: Tiller number, PNO: Panicle number: GRNO: Grain number, HSW: Hundred seed weight (g), GY: Grain yield per plant (g/plant), TDM: Total dry matter (g/plant), GNP: Grain nitrogen percent, SNP: Straw nitrogen percent, GNPP: Grain nitrogen/ plant, SNPP: Straw nitrogen/ plant, NHI: Nitrogen harvest index. B. Path coefficient analysis of morpho physiological, agronomic and yield traits under low nitrogen in dry season. SPAD: SPAD value, LL: Leaf length (cm), LW: Leaf width (cm), LA: Leaf area (cm), DFF: Days to 50% flowering, PH: Plant height (cm), TNO: Tiller number, PNO: Panicle number: GRNO: Grain number, HSW: Hundred seed weight (g), GY: Grain yield per plant (g/plant), TDM: Total dry matter (g/plant), GNP: Grain nitrogen percent, SNP: Straw nitrogen percent, GNPP: Grain nitrogen/ plant, SNPP: Straw nitrogen/ plant, NHI: Nitrogen harvest index. C. Path coefficient analysis of morpho physiological, agronomic and yield traits under recommended nitrogen in wet season. SPAD: SPAD value, LL: Leaf length (cm), LW: Leaf width (cm), LA: Leaf area (cm), DFF: Days to 50% flowering, PH: Plant height (cm), TNO: Tiller number, PNO: Panicle number: GRNO: Grain number, HSW: Hundred seed weight (g), GY: Grain yield per plant (g/plant), TDM: Total dry matter (g/plant), GNP: Grain nitrogen percent, SNP: Straw nitrogen percent, GNPP: Grain nitrogen/ plant, SNPP: Straw nitrogen/ plant, NHI: Nitrogen harvest index. D. Path coefficient analysis of morpho physiological, agronomic and yield traits under recommended nitrogen in dry season. SPAD: SPAD value, LL: Leaf length (cm), LW: Leaf width (cm), LA: Leaf area (cm), DFF: Days to 50% flowering, PH: Plant height (cm), TNO: Tiller number, PNO: Panicle number: GRNO: Grain number, HSW: Hundred seed [file pone.0240854.s007.xlsx]

## Sheet: S7A Table 
S7A Table. Path coefficient analysis of morpho physiological, agronomic and yield traits under low nitrogen during wet season.
	SPAD	LL	LW	LA	DFF	HSW	GRNO	TDM	PH	TNO	PNO	GNP	SNP	GNPP	SNPP	NHI	GY
SPAD	0.014	-0.001	0.001	0	0.001	0.001	0	0	-0.002	0	0	0.001	0.002	0	0.001	-0.001	0.032
LL	0.003	-0.05	-0.022	-0.044	0.008	-0.005	-0.011	-0.014	-0.014	-0.004	-0.007	0.002	-0.008	-0.008	-0.012	0.008	0.254***
LW	-0.006	-0.029	-0.066	-0.053	0.011	-0.019	-0.021	-0.025	-0.023	-0.014	-0.016	-0.006	-0.012	-0.024	-0.016	0.006	0.401***
LA	0.002	0.092	0.084	0.105	-0.021	0.025	0.032	0.04	0.038	0.017	0.023	0.002	0.022	0.032	0.031	-0.017	0.383***
DFF	0	0	0	0	0.002	0	-0.001	-0.001	0	0	0	0	0	-0.001	0	0	-0.404***
HSW	0.021	0.022	0.06	0.048	-0.027	0.205	-0.038	0.022	0.027	-0.012	-0.008	0.035	0.012	0.032	0.024	0.002	0.111
GRNO	0	0.144	0.212	0.207	-0.257	-0.128	0.684	0.558	0.161	0.441	0.509	0.071	0.006	0.552	0.143	0.014	0.941***
TDM	0	0.004	0.006	0.006	-0.005	0.002	0.013	0.015	0.006	0.011	0.012	0.003	0.001	0.012	0.007	0	0.862***
PH	-0.002	0.004	0.005	0.005	-0.001	0.002	0.003	0.006	0.014	0.002	0.003	0	0	0.003	0.002	0	0.292***
TNO	0	0	-0.001	-0.001	0.001	0	-0.003	-0.003	-0.001	-0.005	-0.004	-0.001	0	-0.003	-0.001	0	0.641***
PNO	0	0.002	0.003	0.003	-0.003	-0.001	0.01	0.011	0.003	0.012	0.014	0.001	0.001	0.009	0.005	0	0.743***
GNP	-0.014	0.006	-0.015	-0.003	-0.001	-0.027	-0.017	-0.029	-0.002	-0.017	-0.014	-0.16	-0.007	-0.086	0.003	-0.067	0.157*
SNP	0.005	0.007	0.008	0.009	-0.005	0.002	0	0.003	-0.001	0.001	0.002	0.002	0.044	0.001	0.034	-0.037	0.034
GNPP	0.011	0.061	0.132	0.111	-0.114	0.056	0.292	0.286	0.088	0.214	0.237	0.195	0.01	0.362	0.061	0.073	0.883***
SNPP	-0.002	-0.005	-0.004	-0.006	0.004	-0.002	-0.004	-0.009	-0.003	-0.006	-0.006	0	-0.014	-0.003	-0.019	0.012	0.248***
NHI	-0.001	-0.004	-0.002	-0.004	0.002	0	0	0	0	0	-0.001	0.01	-0.02	0.005	-0.016	0.024	0.018
SPAD: SPAD value, LL: Leaf length (cm), LW: Leaf width (cm), LA: Leaf area (cm), DFF: Days to 50% flowering, PH: Plant height (cm), TNO: Tiller number, PNO: Panicle number: GRNO: Grain number, HSW: Hundred seed weight (g), GY: Grain yield per plant (g/plant), TDM: Total dry matter (g/plant), GNP: Grain nitrogen percent, SNP: Straw nitrogen percent, GNPP: Grain nitrogen/ plant, SNPP: Straw nitroge…

## Sheet: S7B Table
S7B Table. Path coefficient analysis of morpho physiological, agronomic and yield traits under low nitrogen during dry season.
	SPAD	LL	LW	LA	DFF	HSW	GRNO	TDM	PH	TNO	PNO	GNP	SNP	GNPP	SNPP	NHI	GY
SPAD	0.006	-0.001	0	-0.001	-0.001	0.001	-0.001	-0.001	-0.002	0	0	0	0.001	-0.001	0	0	-0.139*
LL	0.004	-0.018	-0.005	-0.015	-0.006	0.004	-0.003	-0.004	-0.006	0	-0.001	0	0	-0.002	-0.002	-0.001	0.082
LW	0.002	-0.006	-0.026	-0.018	0	-0.005	-0.003	-0.004	-0.006	0.003	0.001	-0.001	0	-0.005	0	0	0.18**
LA	-0.002	0.01	0.008	0.012	0.003	-0.001	0.002	0.003	0.005	0	0	0	0	0.002	0.001	0.001	0.158*
DFF	-0.002	0.003	0	0.002	0.009	-0.003	0.003	0.003	0.004	0.001	0	-0.001	-0.001	0.002	0	0.001	0.246***
HSW	0.025	-0.034	0.036	-0.009	-0.06	0.172	-0.045	-0.032	-0.04	-0.026	-0.019	0.016	0.009	0.022	-0.018	-0.005	0.113
GRNO	-0.08	0.066	0.053	0.08	0.135	-0.105	0.4	0.316	0.196	0.068	0.069	-0.02	-0.039	0.333	0.056	0.029	0.906***
TDM	-0.006	0.011	0.007	0.012	0.018	-0.009	0.039	0.049	0.027	0.016	0.017	-0.004	-0.004	0.033	0.017	0.002	0.745***
PH	-0.003	0.004	0.003	0.004	0.005	-0.002	0.005	0.006	0.011	0	0.001	0	-0.001	0.004	0.002	0.001	0.439***
TNO	0	0	-0.001	0	0.001	-0.002	0.003	0.005	0.001	0.015	0.014	0.001	0	0.002	0.002	0	0.11
PNO	-0.001	-0.002	0.002	-0.001	-0.002	0.003	-0.005	-0.01	-0.002	-0.028	-0.029	-0.001	-0.001	-0.004	-0.005	0	0.127*
GNP	-0.009	-0.004	-0.008	-0.007	0.03	-0.021	0.011	0.017	0.004	-0.009	-0.011	-0.226	-0.01	-0.07	0.007	-0.059	-0.029
SNP	0.008	-0.002	-0.001	-0.002	-0.01	0.004	-0.007	-0.006	-0.006	0	0.002	0.003	0.075	-0.005	0.063	-0.07	-0.084
GNPP	-0.075	0.055	0.112	0.1	0.121	0.078	0.508	0.408	0.253	0.074	0.086	0.189	-0.044	0.61	0.042	0.096	0.927***
SNPP	-0.001	-0.003	0	-0.002	0	0.003	-0.003	-0.008	-0.004	-0.003	-0.004	0.001	-0.021	-0.002	-0.025	0.02	0.097
NHI	-0.004	0.002	0.001	0.002	0.005	-0.001	0.004	0.002	0.004	0.001	0	0.014	-0.049	0.008	-0.043	0.052	0.067
SPAD: SPAD value, LL: Leaf length (cm), LW: Leaf width (cm), LA: Leaf area (cm), DFF: Days to 50% flowering, PH: Plant height (cm), TNO: Tiller number, PNO: Panicle number: GRNO: Grain number, HSW: Hundred seed weight (g), GY: Grain yield per plant (g/plant), TDM: Total dry matter (g/plant), GNP: Grain nitrogen percent, SNP: Straw nitrogen percent, GNPP: Grain nitrogen/ plant, SNPP: Straw nitroge…

## Sheet: S7C  Table
S7C Table. Path coefficient analysis of morpho physiological, agronomic and yield traits under recommended nitrogen during wet season.
	SPAD	LL	LW	LA	DFF	HSW	GRNO	TDM	PH	TNO	PNO	GNP	SNP	GNPP	SNPP	NHI	GY
SPAD	0.001048	-0.000244311	0.000220923	-9.86974e-05	5.68631e-05	0.000120827	9.38834e-05	0.000158547	-0.000238062	0.000189311	0.000154494	0.000161585	0.000156784	0.000173974	0.000179868	-8.22035e-05	0.141*
LL	0.0319376	-0.137	-0.0472511	-0.125568	0.00776783	-0.00961839	-0.00247632	-0.0111691	-0.0506512	0.00506995	0.00577171	0.000999229	-0.00324662	-0.00453265	-0.0105853	0.00378051	0.042
LW	-0.011883	-0.0194419	-0.05637	-0.0385514	0.00179624	-0.0234193	-0.0101341	-0.0184206	-0.0164886	-0.0105597	-0.0092199	-0.00546234	-0.0104057	-0.0173154	-0.0142326	0.00798235	0.328***
LA	-0.0167258	0.16278	0.121461	0.1776	-0.0119969	0.0426684	0.0149666	0.0349684	0.0720219	0.00778107	0.00523606	0.00492353	0.0163438	0.0267194	0.0287379	-0.0142888	0.17**
DFF	0.000296578	-0.00030992	-0.000174175	-0.00036923	0.005466	-0.00108078	-0.000562054	-0.000536071	0.000782301	5.30307e-05	-0.000100617	-8.11264e-05	-2.12683e-06	-0.000786113	-0.000111937	-1.30783e-05	-0.153*
HSW	0.0129935	0.00791236	0.046822	0.0270762	-0.022284	0.1127	-0.0174471	0.0171913	0.0170515	-0.00780162	-0.00948912	0.00519565	0.0126432	0.0212333	0.0149917	-0.00900298	0.191**
GRNO	0.0302971	0.00611306	0.0608009	0.0285006	-0.0347762	-0.0523568	0.3382	0.268659	0.00777157	0.226802	0.228491	0.0365311	-0.00593556	0.295939	0.0910118	0.0225745	0.926***
TDM	0.0263993	0.0142263	0.0570232	0.034358	-0.0171139	0.0266183	0.138619	0.1745	0.0299547	0.124927	0.126894	0.0222468	0.00938964	0.145608	0.104223	0.00447419	0.862***
PH	0.00196447	-0.00319731	-0.0025296	-0.00350701	-0.00123771	-0.00130844	-0.000198724	-0.00148452	-0.008648	0.000819746	0.0011275	0.000575403	0.000399841	-0.000489162	-0.000444619	-0.000301152	0.084
TNO	-0.00258857	0.000530309	-0.0026844	-0.000627831	-0.000139028	0.000991989	-0.00960992	-0.010259	0.00135834	-0.01433	-0.0139946	-0.00159193	-0.00137817	-0.00914009	-0.0059276	0.000529444	0.659***
PNO	0.00183683	-0.00052493	0.00203796	0.00036735	-0.00022936	-0.00104911	0.00841807	0.00906073	-0.00162449	0.0121684	0.01246	0.00138801	0.000924174	0.00791181	0.00514362	-0.000194044	0.658***
GNP	-0.0257179	0.00121658	-0.0161632	-0.00462412	0.00247565	-0.00768975	-0.0180171	-0.0212651	0.0110982	-0.0185299	-0.0185811	-0.1668	-0.0152194	-0.064976	-0.0269066	-0.0341814	0.13*
SNP	0.0208996	0.00331061	0.0257882	0.0128561	-5.43574e-05	0.0156721	-0.0024518	0.00751709	-0.00645905	0.0134355	0.0103617	0.0127467	0.1397	0.0071524	0.094917	-0.130994	0.027
GNPP	0.0991389	0.0197584	0.183444	0.089847	-0.0858885	0.112516	0.522574	0.49832	0.0337798	0.380911	0.379208	0.232636	0.0305756	0.5972	0.228421	0.0499184	0.953***
SNPP	-0.0249206	-0.0112188	-0.0366609	-0.0234952	0.00297352	-0.019315	-0.0390743	-0.0867233	-0.00746516	-0.060062	-0.0599401	-0.0234223	-0.0986539	-0.055537	-0.1452	0.0841476	0.335***
NHI	-0.00400114	-0.00140762	-0.00722334	-0.004104	-0.00012205	-0.00407491	0.00340486	0.0013079	0.00177634	-0.00188464	-0.000794395	0.0104532	-0.047831	0.0042638	-0.0295618	0.05101	0.035
SPAD: SPAD value, LL: Leaf length (cm), LW: Leaf width (cm), LA: Leaf area (cm), DFF: Days to 50% flowering, PH: Plant height (cm), TNO: Tiller number, PNO: Panicle number: GRNO: Grain number, HSW: Hundred seed weight (g), GY: Grain yield per plant (g/plant), TDM: Total dry matter (g/plant), GNP: Grain nitrogen percent, SNP: Straw nitrogen percent, GNPP: Grain nitrogen/ plant, SNPP: Straw nitroge…

## Sheet: S7D  Table
S7D Table. Path coefficient analysis of morpho physiological, agronomic and yield traits under recommended nitrogen during dry season.
	SPAD	LL	LW	LA	DFF	HSW	GRNO	TDM	PH	TNO	PNO	GNP	SNP	GNPP	SNPP	NHI	GY
SPAD	0.01338	-0.00140893	0.000511432	-0.000797688	-0.00114736	0.0023635	-0.00114195	0.000305851	-0.000891325	-0.000108222	-0.000196552	-2.91496e-05	0.00114757	0.000132378	0.00132461	-0.000891415	0.015
LL	-0.01609	0.1528	0.0519446	0.137882	0.0443912	-0.0241923	0.013009	0.0278459	0.0231507	0.00851027	0.0094225	0.00849869	-0.0235756	0.00258059	0.00480723	0.0238865	0.009
LW	0.00333539	0.0296642	0.08726	0.0614772	0.000554641	0.0116374	0.0151487	0.0165324	0.0205121	-0.00791316	-0.00617543	-0.00044242	0.00701628	0.0179519	0.0101451	-0.00646957	0.226***
LA	0.0119832	-0.181376	-0.14161	-0.201	-0.0455884	0.0115265	-0.0295056	-0.0465808	-0.0422413	-0.00153928	-0.00410897	-0.00827542	0.017999	-0.0224542	-0.0148909	-0.0188504	0.113
DFF	-0.000862663	0.00292261	6.39432e-05	0.00228169	0.01006	-0.00371001	0.00148148	0.00244449	-0.000812256	-0.00011854	-0.000224935	-0.000483767	-0.00229024	-1.75668e-05	0.000384459	0.00226038	0.007
HSW	0.0282277	-0.0253006	0.0213117	-0.00916383	-0.0589323	0.1598	-0.0517793	-0.0177513	-0.0182026	-0.0250594	-0.0233983	0.00794571	0.0248047	0.0185249	0.0034844	-0.0229289	0.108
GRNO	-0.0304264	0.0303515	0.0618901	0.052332	0.0524998	-0.115515	0.3565	0.262219	0.0408764	0.0949332	0.0952831	-0.023184	-0.0140777	0.300487	0.0762558	0.00655941	0.89***
TDM	0.00168835	0.0134601	0.0139936	0.0171167	0.0179473	-0.00820472	0.0543268	0.07386	0.00918283	0.0237945	0.0240117	-0.00231595	-0.00127789	0.0515468	0.0382544	0.00123125	0.727***
PH	-0.000341808	0.000777396	0.00120614	0.00107831	-0.000414283	-0.000584464	0.000588322	0.000637924	0.005131	0.000242749	0.000296564	-0.00036211	-4.24217e-05	0.000348543	0.000327051	-9.76149e-05	0.088
TNO	0.000550977	-0.00379398	0.00617745	-0.000521671	0.000802681	0.0106824	-0.0181398	-0.0219453	-0.00322277	-0.06812	-0.0672289	-0.000401809	0.00133082	-0.0140422	-0.010533	-0.00175883	0.21***
PNO	-0.00102404	0.00429871	-0.00493341	0.00142505	-0.00155867	-0.0102071	0.0186317	0.0226625	0.00402913	0.0687981	0.06971	0.00046028	-0.000886576	0.0144378	0.0114611	0.00125654	0.214***
GNP	0.000411755	-0.0105121	0.000958256	-0.00778137	0.00908867	-0.00939761	0.0122911	0.00592628	0.0133383	-0.00111482	-0.00124793	-0.189	-0.00728887	-0.0426024	-0.00649837	-0.0338301	-0.06
SNP	0.00755958	-0.0135992	0.00708704	-0.00789271	-0.0200658	0.0136814	-0.00348053	-0.00152496	-0.000728718	-0.00172194	-0.00112097	0.00339916	0.08814	-0.00024695	0.0627826	-0.0851906	0.012
GNPP	0.00633893	0.0108206	0.131811	0.071574	-0.00111879	0.0742735	0.540034	0.447143	0.043522	0.132074	0.132697	0.14442	-0.00179511	0.6407	0.138782	0.0295732	0.949***
SNPP	-0.00858025	-0.00272672	-0.0100765	-0.00642086	-0.00331223	-0.00188982	-0.0185388	-0.0448891	-0.00552437	-0.0134012	-0.0142495	-0.00297997	-0.0617355	-0.0187736	-0.08667	0.0580799	0.219***
NHI	-0.00103932	0.00243867	-0.0011566	0.00146302	0.00350517	-0.00223837	0.000287032	0.000260053	-0.000296783	0.000402786	0.000281193	0.00279232	-0.015078	0.000720058	-0.010454	0.0156	-0.032
SPAD: SPAD value, LL: Leaf length (cm), LW: Leaf width (cm), LA: Leaf area (cm), DFF: Days to 50% flowering, PH: Plant height (cm), TNO: Tiller number, PNO: Panicle number: GRNO: Grain number, HSW: Hundred seed weight (g), GY: Grain yield per plant (g/plant), TDM: Total dry matter (g/plant), GNP: Grain nitrogen percent, SNP: Straw nitrogen percent, GNPP: Grain nitrogen/ plant, SNPP: Straw nitroge…
