# Supplementary material for: A major pleiotropic QTL identified for yield components and nitrogen content in rice (Oryza sativa L.) under differential nitrogen field conditions
Source: PLoS One. 2020 Oct 20;15(10):e0240854. doi: 10.1371/journal.pone.0240854 (PMC7575116; doi:10.1371/journal.pone.0240854)
Supplement: S8 Table — (XLSX) [file pone.0240854.s008.xlsx]

## Sheet: S8 Table
S8 Table. Segregation table of associated SSRs with grain yield under LN by selective genotyping (MapDisto v. 1.7 software (Lorieux 2007))
		Segregation Χ 2 table of group 1 (L_Group_1)
Chr	SSR	Χ21:1	P		hmzA	hmzB	N	m.d.	Χ 21:3	P
1	RM1	10.67	0.00109	**	20	4	24	0	43.56	0	*****
1	RM7075	5.26	0.02181	*	17	6	23	1	29.35	0	*****
1	RM9	8.17	0.00427	**	19	5	24	0	37.56	0	*****
		Segregation Χ 2 table of group 1 (L_Group_1)
Chr	SSR	Χ21:1	P		hmzA	hmzB	N	m.d.	Χ 21:3	P
2	RM13021	13.5	0.00024	***	3	21	24	0	2	0.16	ns
2	RM13197	20.17	1e-05	*****	1	23	24	0	5.56	0.02	*
