# Supplementary material for: A major pleiotropic QTL identified for yield components and nitrogen content in rice (Oryza sativa L.) under differential nitrogen field conditions
Source: PLoS One. 2020 Oct 20;15(10):e0240854. doi: 10.1371/journal.pone.0240854 (PMC7575116; doi:10.1371/journal.pone.0240854)
Supplement: S9 Table — (XLSX) [file pone.0240854.s009.xlsx]

## Sheet: S9 Table
S9 Table. List of polymorphic SSRs between parents BPT5204 and PTB1identified from the saturation of yield associated genomic regions
Genomic region I (RM1)	Genomic region II (RM7075)	Genomic region III (RM9)	Genomic region IV (RM13021)	Genomic region V (RM13197)
Chromosome 1	Chromosome 1	Chromosome 1	Chromosome 2	Chromosome 2
RM5641	RM10890	RM6716	RM13034	RM6374
	RM10916	RM11258		RM13201
				RM13209
