# Supplementary material for: A major pleiotropic QTL identified for yield components and nitrogen content in rice (Oryza sativa L.) under differential nitrogen field conditions
Source: PLoS One. 2020 Oct 20;15(10):e0240854. doi: 10.1371/journal.pone.0240854 (PMC7575116; doi:10.1371/journal.pone.0240854)
Supplement: S10 Table — A. Trait wise marker association under low nitrogen identified through single marker analysis. SPAD: SPAD value, LL: leaf length (cm), LW: leaf width (cm), LA: leaf area (cm), DFF: days to 50% flowering, PH: plant height (cm), TNO: tiller number, PNO: panicle number: GRNO: grain number, HSW: hundred seed weight (g), GY: grain yield per plant (g/plant), TDM: total dry matter (g/plant), GNP: grain nitrogen percent, SNP: straw nitrogen percent, GNPP: grain nitrogen/ plant, SNPP: straw nitrogen/ plant, NHI: nitrogen harvest index, RGY: relative grain yield, RBM: relative biomass yield, RGN: relative grain nitrogen, RBN: relative biomass nitrogen, PNUE: physiological nitrogen use efficiency, ANUE: agronomic nitrogen use efficiency, APE: agro- physiological efficiency. B. Chromosome wise marker trait association under low nitrogen identified through single marker analysis. SPAD: SPAD value, LL: leaf length (cm), LW: leaf width (cm), LA: leaf area (cm), DFF: days to 50% flowering, PH: plant height (cm), TNO: tiller number, PNO: panicle number: GRNO: grain number, HSW: hundred seed weight (g), GY: grain yield per plant (g/plant), TDM: total dry matter (g/plant), GNP: grain nitrogen percent, SNP: straw nitrogen percent, GNPP: grain nitrogen/ plant, SNPP: straw nitrogen/ plant, NHI: nitrogen harvest index, RGY: relative grain yield, RBM: relative biomass yield, RGN: relative grain nitrogen, RBN: relative biomass nitrogen, PNUE: physiological nitrogen use efficiency, ANUE: agronomic nitrogen use efficiency, APE: agro- physiological efficiency. (XLSX) [file pone.0240854.s010.xlsx]

## Sheet: S10A Table
S10A Table. Trait wise marker association under low nitrogen identified through Single marker analysis
Trait	WS		DS		Common
SPAD	RM24829	1	RM1167, RM279, RM19341, RM1189	4	RM7075, RM15855, RM7110	3	8
LL	RM13021, RM3763, RM5455	3	RM171	1	RM10090, RM1189	2	6
LW		0	RM9, RM3763, RM22524, RM1189	3	RM7075, RM13197	2	5
LA		0	RM11307, RM3763, RM14250, RM17201, RM171	5	RM1189	1	6
DFF	RM7075, RM5455	2	RM11307, RM12568, RM20967	3	RM10090, RM3763, RM1189	3	8
PH		0	RM1167, RM13181, RM19341, RM7110, RM1189	5	RM20350, RM20746	2	7
TNO	RM1, RM20967	2	RM10090, RM7110, RM287	3	RM5543	1	6
PNO	RM1, RM19341, RM20967	3	RM495, RM7110, RM287	3		0	6
GY	RM9, RM12276, RM15855, RM20967	4	RM10090, RM13181, RM20746, RM171, RM287	5	RM19341	1	10
HSW	RM24829	1	RM9, RM1167, RM5543	3		0	4
GRNO		0	RM5543, RM171	2	RM20746	1	3
TDM	RM5455	1	RM5, RM495, RM10090, RM12276, RM13021, RM3763, RM14250, RM17201, RM20746, RM7110	10	RM13197	1	12
GNP	RM5, RM7075, RM19341, RM287	4	RM13021, RM15855, RM5455	3	RM13197	1	8
SNP		0		0		0	0
GNPP	RM12276, RM12568, RM15855, RM5455, RM7110, RM1159	6	RM10090, RM279, RM13181, RM17201, RM20746, RM171, RM287	7	RM5, RM11307, RM19341	3	16
SNPP	RM495	1	RM12568, RM14250	2		0	3
NHI	RM495, RM12568, RM20967, RM287	4		0		0	4
PNUE	RM5455, RM24829	2		0		0	2
ANUE	RM7075, RM1189, RM24829, RM171	4	RM20746, RM7110	2		0	6
APE	RM11307, RM24829, RM171	3	RM13021, RM1176, RM13197, RM7110	4		0	7
RGY	RM287	1	RM11307, RM5, RM279, RM1176, RM20746, RM7110	6	RM171	1	8
RBM	RM5455	1	RM13021, RM20746, RM20746, RM7110	4		0	5
RGN	RM495, RM11307, RM12568, RM19341	1	RM15855, RM5455	2	RM13197	1	4
RBN		0		0		0	0
		44		77		23	144
SPAD: SPAD value, LL: leaf length (cm), LW: leaf width (cm), LA: leaf area (cm), DFF: days to 50% flowering, PH: plant height (cm), TNO: tiller number, PNO: panicle number: GRNO: grain number, HSW: hundred seed weight (g), GY: grain yield per plant (g/plant), TDM: total dry matter (g/plant), GNP: grain nitrogen percent, SNP: straw nitrogen percent, GNPP: grain nitrogen/ plant, SNPP: straw nitroge…

## Sheet: S10B Table
S10B Table. Chromosome wise Marker trait association under low nitrogen identified through Single marker analysis.
				Traits/parameters
Chromosome	SSR		Position	Wet		Dry		Common across seasons
1
	RM495	1	216000 – 216020	DFF, SNPP, NHI	3	LL,LA, PNO, TDM	4		0	7
	RM10090	2	1658105 – 1658134		0	SPAD,TNO,GY,GRNO,TDM, GNPP	6	LL,LW,LA, DFF, HSW	5	11
	RM1167	3	4239253 – 4239278		0	HSW,DFF,GY, GRNO,LW,PH,SPAD,TDM,GNPP	9	LL, LA	2	11
	RM1	4	4635793 - 4635870	DFF, PNO,TNO, GY,GRNO, GNPP	6	LL, LA	2		0	8
	RM283	5	4885844 – 4886070		0		0		0	0
	RM7075	6	15101795 - 15101846	LA,DFF,GY,TDM,GNP,GNPP	6	GRNO	1	LW,SPAD,HSW	3	10
	RM11307	7	23926804 – 23926833	GNP	1	LW, LA,DFF, TNO,PNO,GY	6	HSW,GNPP	2	9
	RM5	8	23968577 – 23968606	GNP	1	LW,GY,GRNO,TDM	4	HSW,GNPP	2	7
	RM9	9	24665458 - 24665810	GY	1	LW,HSW	2		0	3
	RM12276	10	43036717 - 43036750	DFF,GY,GNPP	3	LL, TNO,PNO,GRNO,TDM,	5	SPAD,PH,HSW	3	11
2	RM13021	11	10899443 - 10899591	LL,LW,LA,SNP,SNPP	5	DFF, PH,GRNO,TDM,GNP	5	HSW,SNP	2	12
	RM13197	12	17224533 - 17224693	LA,GY,SNPP	3	DFF,PH,SNP	3	LL,LW,HSW,TDM,GNP, GNPP	6	12
	RM13181	13	16068799 - 16068826	SNP,NHI	2	DFF, PH,GY,GRNO,TDM,GNPP	6	LW,HSW	2	10
	RM279	14	2882052 - 2882215	LL,LA,PH	3	SPAD,DFF,GY,GRNO,GNPP	5		0	8
	RM12568	15	4273759 - 4273791	LL,PH,NHI,GNPP	4	DFF,SNP,SNPP	3	SPAD,HSW	2	9
	RM3763	16	27950171 - 27950206	LL	1	LA,LW, TNO,PNO,TDM	5	SPAD,DFF,PH, HSW	4	10
3	RM14250	17	194662 – 194784		0	LA,LL,TDM,SNPP	4	LL	1	5
	RM15855	18	29619406 - 29619497	LW,LA,PH,GY,HSW,TDM,GNPP	7	TNO,GNP	2	LL,SPAD,PNO	3	12
4	RM17201	19	25195610 - 25195701	GNPP	1	LA,TDM	2	LL	1	4
6	RM19341	20	1764661 - 1764696	PNO,GNP	2	LW,SPAD, DFF,PH,GRNO,TDM	6	LL,LA,GY,GNPP	4	12
	RM20350	21	23552227 - 23552266		0	LA	1	LL, SPAD,PH, HSW	4	5
	RM20746	22	30452023 - 30452067	LW,LA	2	DFF,GY,TDM,GNPP	4	PH,HSW,GRNO	3	9
7	RM20967	23	2711915 - 2711936	TNO,PNO,GY,GRNO,NHI	5	DFF	1	PH,HSW	2	8
	RM5543	24	15615292 – 15615737		0	PNO,HSW	2	TNO	1	3
	RM7110	25	16310771 – 16310937	LA,GNPP	2	DFF, PH,TNO,PNO,GRNO, TDM	6	LW,SPAD,HSW	3	11
	RM5455	26	27122086 – 27122284	LL,LA,DFF,PH,TDM, SNP,GNPP,SNPP	8	TNO,SPAD,GRNO,GNP	4	LW,HSW	2	14
8	RM22524	27	5110450 - 5110493		0	LW,SPAD	2	LL,LA	2	4
9	RM1189	28	16217526 - 16217553		0	SPAD,LW,PH,SNPP	4	LL,LA,DFF,HSW	4	8
	RM24829	29	22419780 - 22419809	SPAD,HSW	2				0	2
10	RM171	30	19577767 - 19577458		0	LL,LA, PH,GY,GRNO,TDM,GNPP	7	DFF	1	8
11	RM287	31	16610716 - 16610745	GNP,NHI	2	GY,TNO,PNO,TDM, GNPP	5	DFF,PH,HSW	3	10
12	RM1159	32	25939136 – 25939285	HSW,TDM,GNPP	3	SPAD	1		0	4
	9									257
		28.125
SPAD: SPAD value, LL: leaf length (cm), LW: leaf width (cm), LA: leaf area (cm), DFF: days to 50% flowering, PH: plant height (cm), TNO: tiller number, PNO: panicle number: GRNO: grain number, HSW: hundred seed weight (g), GY: grain yield per plant (g/plant), TDM: total dry matter (g/plant), GNP: grain nitrogen percent, SNP: straw nitrogen percent, GNPP: grain nitrogen/ plant, SNPP: straw nitroge…
