# Supplementary material for: A major pleiotropic QTL identified for yield components and nitrogen content in rice (Oryza sativa L.) under differential nitrogen field conditions
Source: PLoS One. 2020 Oct 20;15(10):e0240854. doi: 10.1371/journal.pone.0240854 (PMC7575116; doi:10.1371/journal.pone.0240854)
Supplement: S11 Table — A. Trait wise associations with phenotypic traits with single marker analysis of for nine polymorphic SSRs. SPAD: SPAD value, LL: leaf length (cm), LW: leaf width (cm), LA: leaf area (cm), DFF: days to 50% flowering, PH: plant height (cm), TNO: tiller number, PNO: panicle number: GRNO: grain number, HSW: hundred seed weight (g), GY: grain yield per plant (g/plant), TDM: total dry matter (g/plant), GNP: grain nitrogen percent, SNP: straw nitrogen percent, GNPP: grain nitrogen/ plant, SNPP: straw nitrogen/ plant, NHI: nitrogen harvest index, RGY: relative grain yield, RBM: relative biomass yield, RGN: relative grain nitrogen, RBN: relative biomass nitrogen, PNUE: physiological nitrogen use efficiency, ANUE: agronomic nitrogen use efficiency, APE: agro- physiological efficiency. B. Marker wise associations with phenotypic traits with single marker analysis of for nine polymorphic SSRs. SPAD: SPAD value, LL: leaf length (cm), LW: leaf width (cm), LA: leaf area (cm), DFF: days to 50% flowering, PH: plant height (cm), TNO: tiller number, PNO: panicle number: GRNO: grain number, HSW: hundred seed weight (g), GY: grain yield per plant (g/plant), TDM: total dry matter (g/plant), GNP: grain nitrogen percent, SNP: straw nitrogen percent, GNPP: grain nitrogen/ plant, SNPP: straw nitrogen/ plant, NHI: nitrogen harvest index, RGY: relative grain yield, RBM: relative biomass yield, RGN: relative grain nitrogen, RBN: relative biomass nitrogen, PNUE: physiological nitrogen use efficiency, ANUE: agronomic nitrogen use efficiency, APE: agro- physiological efficiency. (XLSX) [file pone.0240854.s011.xlsx]

## Sheet: S11A Table
S11A Table. Trait wise associations with phenotypic traits with single marker analysis of for nine polymorphic SSRs
Trait	Wet	Dry	Common for both seasons
/parameter
LL	-	RM11258	-
LW	-	RM6716	RM13201
LA	-	RM6716,RM11258	-
SPAD	-	-	RM13034,RM13209
DFF	-	RM13034	-
PH	-	RM5641,RM6716,RM13034	-
TNO	-	-	-
TDM	-	RM6716	RM13201
PNO	-	-	-
GY	-	RM6716	RM13201
GRNO	-	RM6374	-
HSW	-	RM11258	-
GNP	RM6716,RM10890,RM11258	RM5641,RM13201	-
SNP	RM5641	-	RM13034
NHI	RM5641,RM10890	-	-
GNPP	RM10916	RM6716,RM11258	RM13201
SNPP	RM13034	-	-
PNUE	-	-	-
ANUE	RM6374	-	-
APE	-	RM13201	-
RBN	RM5641,RM6716	RM6716,RM13034	-
RBY	-	RM13201	-
RGN	RM10890	RM5641, RM13201	-
RGY	-	RM6716,RM11258,RM13201,RM13209	-
SPAD: SPAD value, LL: leaf length (cm), LW: leaf width (cm), LA: leaf area (cm), DFF: days to 50% flowering, PH: plant height (cm), TNO: tiller number, PNO: panicle number: GRNO: grain number, HSW: hundred seed weight (g), GY: grain yield per plant (g/plant), TDM: total dry matter (g/plant), GNP: grain nitrogen percent, SNP: straw nitrogen percent, GNPP: grain nitrogen/ plant, SNPP: straw nitroge…

## Sheet: S11B Table
S11B Table. Marker wise associations with phenotypic traits with single marker analysis of for nine polymorphic SSRs
Region	SSR	Position	Traits/parameters
			WS	DS	Common across both seasons
Genomic Region I	RM5641	4966407 – 4966568	NHI, SNP	PH,GNP	LL,LA,HSW
Genomic Region II	RM10890	14903069 - 14903287	LW,GY,HSW,TDM,GNP,GNPP,NHI		HSW
	RM10916	15301749 - 15302023	TDM,GNPP
Genomic Region III	RM11258	24614598 - 24614822	GNP	LL,LW,LA,DFF,PH, GY,HSW,GRNO,TDM,GNPP
	RM6716	24622073 - 24622534	GNP	LW,LA,DFF,PH,GY,HSW,GRNO,TDM,GNPP
Genomic Region IV	RM13034	10952426 - 10952693		DFF, PH,GRNO,NHI	SPAD,HSW, SNP,SNPP
Genomic Region V	RM13201	16576296 - 16576316	LL,LA,SNPP	DFF,PH,GRNO,GNP,	LW,GY,HSW, TDM,SNP,GNPP
	RM6374	15966696 - 15966933	TNO	-
	RM13209	17433644 - 17433904	DFF		SPAD,PH
SPAD: SPAD value, LL: leaf length (cm), LW: leaf width (cm), LA: leaf area (cm), DFF: days to 50% flowering, PH: plant height (cm), TNO: tiller number, PNO: panicle number: GRNO: grain number, HSW: hundred seed weight (g), GY: grain yield per plant (g/plant), TDM: total dry matter (g/plant), GNP: grain nitrogen percent, SNP: straw nitrogen percent, GNPP: grain nitrogen/ plant, SNPP: straw nitroge…
