# Supplementary material for: A major pleiotropic QTL identified for yield components and nitrogen content in rice (Oryza sativa L.) under differential nitrogen field conditions
Source: PLoS One. 2020 Oct 20;15(10):e0240854. doi: 10.1371/journal.pone.0240854 (PMC7575116; doi:10.1371/journal.pone.0240854)
Supplement: S12 Table — SPAD: SPAD value, LL: leaf length (cm), LW: leaf width (cm), LA: leaf area (cm), DFF: days to 50% flowering, PH: plant height (cm), TNO: tiller number, PNO: panicle number: GRNO: grain number, HSW: hundred seed weight (g), GY: grain yield per plant (g/plant), TDM: total dry matter (g/plant), GNP: grain nitrogen percent, SNP: straw nitrogen percent, GNPP: grain nitrogen/ plant, SNPP: straw nitrogen/ plant, NHI: nitrogen harvest index, RN: Recommended nitrogen, LN: Low nitrogen, WS: Wet season, DS: Dry season. (XLSX) [file pone.0240854.s012.xlsx]

## Sheet: S12 Table 
S12 Table. Details of QTL identified through CIM for traits under Recommeneded Nitrogen (RN)
	Season	Treatment	Trait	Chromosome	Left Marker	LOD	R2
1	WS	RN	SPAD	1	RM9 - RM12276	2.97	13.6198
2	WS	RN	LL	1	RM5641 - RM10890	3.24	31.1092
3	WS	RN	LA	1	RM5641 - RM10890	4.15	40.2902
4	WS	RN	GY	1	RM7075 - RM10916	3.34	9.4331
5	WS	RN	HSW	1	RM10890 - RM7075	10.38	22.5056
6	WS	RN	TDM	1	RM7075 - RM10916	3.58	6.9293
7	WS	RN	DFF	1	RM5641 - RM10890	11.12	65.9266
8	DS	RN	LL	1	RM5641 - RM10890	4.78	21.9458
9	DS	RN	LW	1	RM495 - RM10090	2.79	3.9921
10	DS	RN	LA	1	RM495 - RM10090	2.59	5.3347
11	DS	RN	LA	1	RM5641 - RM10890	2.95	12.9313
12	DS	RN	HSW	1	RM10890 - RM10916	12	21.523
13	DS	RN	HSW	1	RM5641 - RM10890	4.05	8.8527
14	DS	RN	GRNO	1	RM10890 - RM10916	2.85	5.8505
15	DS	RN	DFF	1	RM10890 - RM7075	3.13	65.2638
16	DS	RN	DFF	1	RM1167 - RM1	3.08	61.8392
17	DS	RN	DFF	1	RM7075 - RM10916	5.4	56.8659
18	WS	RN	LA	2	RM13201 - RM13209	3.61998	37.1529
19	WS	RN	GY	2	RM13201 - RM13209	7.96308	53.3458
20	WS	RN	TDM	2	RM13201 - RM13209	3.64821	50.5709
21	WS	RN	TNO	2	RM13201 - RM13209	4.72747	55.8735
22	WS	RN	SNP	2	RM13201 - RM13209	3.4354	43.9036
23	DS	RN	DFF	2	RM13201 - RM13209	12.3735	63.1329
24	DS	RN	SNP	2	RM13201 - RM13209	2.70793	40.5238
25	WS	RN	PH	2	RM13209 - RM3763	4.02172	17.3768
26	WS	RN	DFF	2	RM13209 - RM3763	4.91857	13.9956
27	DS	RN	PH	2	RM13209 - RM3763	3.01194	9.9436
28	WS	RN	HSW	2	RM6374 - RM13181	5.90011	40.5273
29	DS	RN	LW	2	RM6374 - RM13181	2.50163	24.1701
30	DS	RN	HSW	2	RM279 - RM12568	4.90771	9.6209
31	DS	RN	SNP	2	RM279 - RM324	3.038	26.3141
32	DS	RN	NHI	2	RM279 - RM324	2.94245	21.9131
SPAD: SPAD value, LL: leaf length (cm), LW: leaf width (cm), LA: leaf area (cm), DFF: days to 50% flowering, PH: plant height (cm), TNO: tiller number, PNO: panicle number: GRNO: grain number, HSW: hundred seed weight (g), GY: grain yield per plant (g/plant), TDM: total dry matter (g/plant), GNP: grain nitrogen percent, SNP: straw nitrogen percent, GNPP: grain nitrogen/ plant, SNPP: straw nitroge…
