# Supplementary material for: A major pleiotropic QTL identified for yield components and nitrogen content in rice (Oryza sativa L.) under differential nitrogen field conditions
Source: PLoS One. 2020 Oct 20;15(10):e0240854. doi: 10.1371/journal.pone.0240854 (PMC7575116; doi:10.1371/journal.pone.0240854)
Supplement: S13 Table — (XLSX) [file pone.0240854.s013.xlsx]

## Sheet: RM13201 to RM13209
S13 Table. The details of putative candidate genes in the region of pleiotropic QTL
RM13201 to RM13209
SNO	ID	Description	Chromosome	Start	End	Strand	GO	InterPro
1	Os02t0481700-01	Similar to lipase class 3 family protein.	chr02	16602669	16608160	-
2	Os02t0481900-01	Hypothetical conserved gene.	chr02	16617411	16618556	+	Cellular Component: intracellular (GO:0005622), Molecular Function: nucleic acid binding (GO:0003676), Molecular Function: exonuclease activity (GO:0004527)	Putative 5-3 exonuclease (IPR004859)
3	Os02t0481900-02	Putative 5-3 exonuclease domain containing protein.	chr02	16617437	16633889	+	Cellular Component: intracellular (GO:0005622), Molecular Function: nucleic acid binding (GO:0003676), Molecular Function: exonuclease activity (GO:0004527)	Putative 5-3 exonuclease (IPR004859)
4	Os02t0482200-00	Hypothetical genes.	chr02	16635166	16635946	+
5	Os02t0482400-01	Similar to Ornithine decarboxylase (EC 4.1.1.17) (ODC).	chr02	16639696	16641280	-	Biological Process: polyamine biosynthetic process (GO:0006596), Molecular Function: catalytic activity (GO:0003824)	Ornithine/DAP/Arg decarboxylase (IPR000183), Ornithine decarboxylase (IPR002433), Orn/DAP/Arg decarboxylase 2, N-terminal (IPR022644), Orn/DAP/Arg decarboxylase 2, pyridoxal-phosphate binding site (IPR022653)
6	Os02t0483000-00	Similar to fasciclin-like arabinogalactan protein 8.	chr02	16660905	16661495	+
7	Os02t0483500-01	Transferase family protein.	chr02	16678288	16680030	-	Molecular Function: transferase activity, transferring acyl groups other than amino-acyl groups (GO:0016747)	Transferase (IPR003480), Chloramphenicol acetyltransferase-like domain (IPR023213)
8	Os02t0483800-00	Transferase domain containing protein.	chr02	16692007	16693524	-	Molecular Function: transferase activity, transferring acyl groups other than amino-acyl groups (GO:0016747)	Transferase (IPR003480), Chloramphenicol acetyltransferase-like domain (IPR023213)
9	Os02t0484200-01	Transferase family protein.	chr02	16702161	16703949	+	Molecular Function: transferase activity, transferring acyl groups other than amino-acyl groups (GO:0016747)	Transferase (IPR003480), Chloramphenicol acetyltransferase-like domain (IPR023213)
10	Os02t0484390-00	Similar to SRR1-like protein.	chr02	16718580	16719215	+		Sensitivity To Red Light Reduced-like, SRR1 (IPR012942)
11	Os02t0484900-01	Non-protein coding transcript.	chr02	16747801	16748325	-
12	Os02t0484950-00	Hypothetical conserved gene.	chr02	16747962	16748375	+
13	Os02t0484975-00	Conserved hypothetical protein.	chr02	16750078	16751562	-
14	Os02t0485000-01	Transferase domain containing protein.	chr02	16750745	16751765	+	Molecular Function: transferase activity, transferring acyl groups other than amino-acyl groups (GO:0016747)	Transferase (IPR003480), Chloramphenicol acetyltransferase-like domain (IPR023213)
15	Os02t0485800-00	Transferase domain containing protein.	chr02	16806547	16807323	+	Molecular Function: transferase activity, transferring acyl groups other than amino-acyl groups (GO:0016747)	Transferase (IPR003480), Chloramphenicol acetyltransferase-like domain (IPR023213)
16	Os02t0486400-01	Hypothetical protein.	chr02	16830402	16834864	+
17	Os02t0486500-00	Hypothetical conserved gene.	chr02	16835066	16836043	+	Molecular Function: transferase activity, transferring acyl groups other than amino-acyl groups (GO:0016747)	Transferase (IPR003480), Chloramphenicol acetyltransferase-like domain (IPR023213)
18	Os02t0487300-01	WRC domain containing protein.	chr02	16915529	16919294	+	Molecular Function: protein binding (GO:0005515)	WRC (IPR014977)
19	Os02t0488600-01	Armadillo-like helical domain containing protein.	chr02	16981502	16985338	-	Biological Process: protein ubiquitination (GO:0016567), Cellular Component: ubiquitin ligase complex (GO:0000151), Molecular Function: ubiquitin-protein ligase activity (GO:0004842), Molecular Function: binding (GO:0005488), Molecular Function: protein binding (GO:0005515)	Armadillo (IPR000225), U box domain (IPR003613), Armadillo-like helical (IPR011989), Zinc finger, RING/FYVE/PHD-type (IPR013083), Armadillo-type fold (IPR016024)
20	Os02t0489400-01	Similar to 40S ribosomal protein S8.	chr02	17035598	17038087	+	Biological Process: translation (GO:0006412), Cellular Component: intracellular (GO:0005622), Cellular Component: ribosome (GO:0005840), Molecular Function: structural constituent of ribosome (GO:0003735)	Ribosomal protein S8e (IPR001047), Ribosomal protein S8e, conserved site (IPR018283), Ribosomal protein S8e/ribosomal biogenesis NSA2 (IPR022309)
21	Os02t0489500-01	Conserved hypothetical protein.	chr02	17039977	17041137	+
22	Os02t0489525-00	Hypothetical protein.	chr02	17046737	17058490	+
23	Os02t0489550-00	Tetratricopeptide TPR-1 domain containing protein.	chr02	17046796	17054964	-	Molecular Function: binding (GO:0005488), Molecular Function: protein binding (GO:0005515)	Tetratricopeptide TPR-1 (IPR001440), Tetratricopeptide-like helical (IPR011990), Tetratricopeptide repeat-containing (IPR013026), Tetratricopeptide repeat (IPR019734)
24	Os02t0489600-01	Conserved hypothetical protein.	chr02	17055099	17057077	-
25	Os02t0489700-00	Non-protein coding transcript.	chr02	17074638	17077487	-
26	Os02t0489800-00	Similar to SKIP interacting protein 18 (Fragment).	chr02	17078729	17081901	+		Kinesin-related conserved domain (IPR010544)
27	Os02t0490000-01	Zinc finger, RING/FYVE/PHD-type domain containing protein.	chr02	17085385	17088925	+	Biological Process: protein ubiquitination (GO:0016567), Cellular Component: ubiquitin ligase complex (GO:0000151), Molecular Function: ubiquitin-protein ligase activity (GO:0004842), Molecular Function: binding (GO:0005488)	U box domain (IPR003613), Armadillo-like helical (IPR011989), Armadillo-type fold (IPR016024)
28	Os02t0490500-01	UDP-glucuronosyl/UDP-glucosyltransferase family protein.	chr02	17118788	17120662	+	Biological Process: metabolic process (GO:0008152), Molecular Function: transferase activity, transferring hexosyl groups (GO:0016758)	UDP-glucuronosyl/UDP-glucosyltransferase (IPR002213)
29	Os02t0490500-02	UDP-glucuronosyl/UDP-glucosyltransferase family protein.	chr02	17118840	17120662	+	Biological Process: metabolic process (GO:0008152), Molecular Function: transferase activity, transferring hexosyl groups (GO:0016758)	UDP-glucuronosyl/UDP-glucosyltransferase (IPR002213)
30	Os02t0491300-01	Secretory fasciclin glycoprotein, Regulation of anther development and pollen formation	chr02	17150510	17152509	+		FAS1 domain (IPR000782)
31	Os02t0491400-01	Similar to Peptidylprolyl isomerase.	chr02	17156517	17160895	-	Biological Process: protein folding (GO:0006457), Molecular Function: binding (GO:0005488), Molecular Function: protein binding (GO:0005515)	Peptidyl-prolyl cis-trans isomerase, FKBP-type, domain (IPR001179), Tetratricopeptide TPR-1 (IPR001440), Tetratricopeptide-like helical (IPR011990), Tetratricopeptide repeat-containing (IPR013026), Tetratricopeptide repeat (IPR019734), Elongated TPR repeat-containing domain (IPR023114), Peptidyl-prolyl cis-trans isomerase, FKBP-type (IPR023566)
32	Os02t0491600-00	Similar to Oxalate oxidase-like protein or germin-like protein (Germin-like 8) (Germin-like 12).	chr02	17165188	17165997	-	Cellular Component: apoplast (GO:0048046), Molecular Function: manganese ion binding (GO:0030145), Molecular Function: nutrient reservoir activity (GO:0045735)	Germin (IPR001929), Cupin 1 (IPR006045), Cupin, RmlC-type (IPR011051), RmlC-like jelly roll fold (IPR014710), Germin, manganese binding site (IPR019780)
33	Os02t0491700-00	Putative germin-like protein 2-2.	chr02	17167417	17168289	+	Cellular Component: apoplast (GO:0048046), Molecular Function: manganese ion binding (GO:0030145), Molecular Function: nutrient reservoir activity (GO:0045735)	Germin (IPR001929), Cupin 1 (IPR006045), Cupin, RmlC-type (IPR011051), RmlC-like jelly roll fold (IPR014710), Germin, manganese binding site (IPR019780)
34	Os02t0491800-00	Similar to Germin-like protein subfamily 1 member 15 precursor.	chr02	17175222	17175893	+	Cellular Component: apoplast (GO:0048046), Molecular Function: manganese ion binding (GO:0030145), Molecular Function: nutrient reservoir activity (GO:0045735)	Germin (IPR001929), Cupin 1 (IPR006045), Cupin, RmlC-type (IPR011051), RmlC-like jelly roll fold (IPR014710), Germin, manganese binding site (IPR019780)
35	Os02t0491900-00	Ankyrin repeat domain containing protein.	chr02	17183488	17191760	-	Molecular Function: binding (GO:0005488), Molecular Function: protein binding (GO:0005515)	Ankyrin repeat (IPR002110), Tetratricopeptide-like helical (IPR011990), Ankyrin repeat-containing domain (IPR020683)
36	Os02t0492000-01	Ankyrin repeat containing protein.	chr02	17196142	17204631	-	Molecular Function: protein binding (GO:0005515)	Ankyrin repeat (IPR002110), Ankyrin repeat-containing domain (IPR020683)
37	Os02t0492000-02	Similar to Ankyrin-like protein-like protein.	chr02	17196219	17204516	-	Molecular Function: protein binding (GO:0005515)	Ankyrin repeat (IPR002110), Ankyrin repeat-containing domain (IPR020683)
38	Os02t0492500-01	Domain of unknown function DUF1618 domain containing protein.	chr02	17223614	17227328	+		Domain of unknown function DUF1618 (IPR011676)
39	Os02t0492600-00	Tetratricopeptide-like helical domain containing protein.	chr02	17229100	17236190	-	Molecular Function: binding (GO:0005488), Molecular Function: protein binding (GO:0005515)	Tetratricopeptide-like helical (IPR011990), Tetratricopeptide repeat-containing (IPR013026), Tetratricopeptide TPR2 (IPR013105), Tetratricopeptide repeat (IPR019734)
40	Os02t0492800-00	Conserved hypothetical protein.	chr02	17244227	17244732	+
41	Os02t0492900-01	Similar to Ankyrin-like protein-like protein.	chr02	17245021	17254879	-	Molecular Function: binding (GO:0005488), Molecular Function: protein binding (GO:0005515)	Ankyrin repeat (IPR002110), Tetratricopeptide-like helical (IPR011990), Tetratricopeptide repeat-containing (IPR013026), Tetratricopeptide repeat (IPR019734), Ankyrin repeat-containing domain (IPR020683)
42	Os02t0493050-00	Ankyrin repeat domain containing protein.	chr02	17258676	17265927	-	Molecular Function: binding (GO:0005488), Molecular Function: protein binding (GO:0005515)	Ankyrin repeat (IPR002110), Tetratricopeptide-like helical (IPR011990), Tetratricopeptide repeat (IPR019734), Ankyrin repeat-containing domain (IPR020683)
43	Os02t0493087-00	Hypothetical protein.	chr02	17274145	17275940	+
44	Os02t0493100-00	F-box domain, cyclin-like domain containing protein.	chr02	17274467	17275865	-	Molecular Function: protein binding (GO:0005515)	F-box domain, cyclin-like (IPR001810), F-box domain, Skp2-like (IPR022364)
45	Os02t0493200-01	Non-protein coding transcript.	chr02	17276127	17276767	-
46	Os02t0493300-01	Tetratricopeptide-like helical domain containing protein.	chr02	17277320	17290200	-	Molecular Function: binding (GO:0005488), Molecular Function: protein binding (GO:0005515)	Ankyrin repeat (IPR002110), Tetratricopeptide-like helical (IPR011990), Tetratricopeptide repeat-containing (IPR013026), Ankyrin repeat-containing domain (IPR020683)
47	Os02t0493650-00	Non-protein coding transcript.	chr02	17278811	17289905	+
48	Os02t0494000-00	Ankyrin repeat domain containing protein.	chr02	17308584	17315834	-	Molecular Function: protein binding (GO:0005515)	Ankyrin repeat (IPR002110), Ankyrin repeat-containing domain (IPR020683)
49	Os02t0494400-01	Similar to TPR Domain containing protein, expressed.	chr02	17327569	17335567	-	Molecular Function: binding (GO:0005488), Molecular Function: protein binding (GO:0005515)	Ankyrin repeat (IPR002110), Tetratricopeptide-like helical (IPR011990), Tetratricopeptide repeat-containing (IPR013026), Tetratricopeptide repeat (IPR019734), Ankyrin repeat-containing domain (IPR020683)
50	Os02t0494600-01	Conserved hypothetical protein.	chr02	17339028	17342514	+
51	Os02t0494700-00	Similar to Repressor of silencing 1.	chr02	17358716	17369016	+
52	Os02t0495400-01	Armadillo-like helical domain containing protein.	chr02	17406212	17411120	-	Molecular Function: binding (GO:0005488)	Armadillo-like helical (IPR011989)
53	Os02t0495900-01	Similar to predicted protein.	chr02	17416442	17419157	+
54	Os02t0496100-01	Heat shock factor (HSF)-type, DNA-binding domain containing protein.	chr02	17428031	17431216	+	Biological Process: regulation of transcription, DNA-dependent (GO:0006355), Cellular Component: nucleus (GO:0005634), Molecular Function: sequence-specific DNA binding transcription factor activity (GO:0003700), Molecular Function: sequence-specific DNA binding (GO:0043565)	Heat shock factor (HSF)-type, DNA-binding (IPR000232), Winged helix-turn-helix transcription repressor DNA-binding (IPR011991)
				825362
				825.362
				825.4 kb region

## Sheet: RM13181 to RM 13201
S13 Table. The details of putative candidate genes in the region of pleiotropic QTL
SNO	ID	Description	Chromosome	Start	End	Strand	GO	InterPro
1	Os02t0472500-00	Similar to Pathogenesis-related protein PR1c.	chr02	16082576	16086172	+		Allergen V5/Tpx-1-related (IPR001283), Ves allergen (IPR002413), CAP domain (IPR014044)
2	Os02t0472566-00	Allergen V5/Tpx-1-related domain containing protein.	chr02	16084509	16091031	+	Cellular Component: extracellular region (GO:0005576)	Allergen V5/Tpx-1-related (IPR001283), CAP domain (IPR014044), Allergen V5/Tpx-1-related, conserved site (IPR018244)
3	Os02t0472700-00	Similar to receptor-like serine-threonine protein kinase.	chr02	16091726	16094120	+	Biological Process: protein phosphorylation (GO:0006468), Molecular Function: protein kinase activity (GO:0004672), Molecular Function: protein serine/threonine kinase activity (GO:0004674), Molecular Function: protein tyrosine kinase activity (GO:0004713), Molecular Function: ATP binding (GO:0005524), Molecular Function: transferase activity, transferring phosphorus-containing groups (GO:0016772)	Protein kinase, catalytic domain (IPR000719), Serine/threonine-protein kinase, catalytic domain (IPR002290), Serine/threonine-protein kinase, active site (IPR008271), Protein kinase-like domain (IPR011009), Protein kinase, ATP binding site (IPR017441), Serine/threonine-protein kinase-like domain (IPR017442), Tyrosine-protein kinase, catalytic domain (IPR020635)
4	Os02t0473000-02	Similar to cDNA clone:J013024H13, full insert sequence.	chr02	16104693	16107707	-	Biological Process: oxidation-reduction process (GO:0055114), Molecular Function: oxidoreductase activity (GO:0016491)	Conserved hypothetical protein CHP02464 (IPR012816), Dihydrofolate reductase-like domain (IPR024072)
5	Os02t0473000-01	Riboflavin biosynthesis protein RibD family protein.	chr02	16104779	16110335	-	Biological Process: riboflavin biosynthetic process (GO:0009231), Biological Process: oxidation-reduction process (GO:0055114), Molecular Function: 5-amino-6-(5-phosphoribosylamino)uracil reductase activity (GO:0008703), Molecular Function: diaminohydroxyphosphoribosylaminopyrimidine deaminase activity (GO:0008835), Molecular Function: oxidoreductase activity (GO:0016491), Molecular Function: NAD…	Bacterial bifunctional deaminase-reductase, C-terminal (IPR002734), Riboflavin biosynthesis protein RibD (IPR004794), Riboflavin-specific deaminase, C-terminal (IPR011549), Conserved hypothetical protein CHP02464 (IPR012816), Dihydrofolate reductase-like domain (IPR024072)
6	Os02t0473200-03	Hypothetical conserved gene.	chr02	16114933	16116561	-	Biological Process: proteolysis (GO:0006508), Molecular Function: aspartic-type endopeptidase activity (GO:0004190)	Peptidase aspartic, catalytic (IPR009007)
7	Os02t0473200-01	Peptidase aspartic, catalytic domain containing protein.	chr02	16114955	16120438	-	Biological Process: proteolysis (GO:0006508), Molecular Function: aspartic-type endopeptidase activity (GO:0004190)	Peptidase A1 (IPR001461), Peptidase aspartic, catalytic (IPR009007), Peptidase aspartic (IPR021109)
8	Os02t0473200-02	Similar to OSIGBa0137O04.7 protein.	chr02	16118651	16120437	-	Biological Process: proteolysis (GO:0006508), Molecular Function: aspartic-type endopeptidase activity (GO:0004190)	Peptidase A1 (IPR001461), Peptidase aspartic, catalytic (IPR009007), Peptidase aspartic (IPR021109)
9	Os02t0474000-01	F-box associated interaction domain domain containing protein.	chr02	16150047	16152871	+		F-box associated interaction domain (IPR017451), F-box domain, Skp2-like (IPR022364)
10	Os02t0474300-01	Similar to DNA topoisomerase.	chr02	16172700	16180335	+	Biological Process: DNA topological change (GO:0006265), Cellular Component: chromosome (GO:0005694), Molecular Function: DNA binding (GO:0003677), Molecular Function: DNA topoisomerase activity (GO:0003916)	DNA topoisomerase, type IA, central region, subdomain 3 (IPR013826)
11	Os02t0474700-01	Armadillo-like helical domain containing protein.	chr02	16208349	16215978	+	Molecular Function: binding (GO:0005488)	Armadillo-like helical (IPR011989), Armadillo-type fold (IPR016024)
12	Os02t0475101-00	Similar to RING-H2 finger protein ATL5A.	chr02	16242898	16243417	+	Molecular Function: protein binding (GO:0005515), Molecular Function: zinc ion binding (GO:0008270)	Zinc finger, RING-type (IPR001841), Zinc finger, RING/FYVE/PHD-type (IPR013083), Zinc finger, RING-H2-type (IPR024766)
13	Os02t0475300-01	Membrane attack complex component/perforin/complement C9 family protein.	chr02	16259553	16264489	+		Membrane attack complex component/perforin (MACPF) domain (IPR020864)
14	Os02t0475300-02	Similar to MAC/Perforin domain containing protein.	chr02	16259612	16263209	+		Membrane attack complex component/perforin (MACPF) domain (IPR020864)
15	Os02t0475300-03	Similar to MAC/Perforin domain containing protein.	chr02	16261511	16264323	+		Membrane attack complex component/perforin (MACPF) domain (IPR020864)
16	Os02t0475400-01	Bile acid:sodium symporter family protein.	chr02	16265406	16268832	+	Biological Process: sodium ion transport (GO:0006814), Cellular Component: membrane (GO:0016020), Molecular Function: bile acid:sodium symporter activity (GO:0008508)	Bile acid:sodium symporter (IPR002657)
17	Os02t0475500-00	NB-ARC domain containing protein.	chr02	16270018	16277534	-	Molecular Function: ADP binding (GO:0043531)	NB-ARC (IPR002182)
18	Os02t0476700-01	Hypothetical gene.	chr02	16323185	16325968	+
19	Os02t0476901-00	Hypothetical conserved gene.	chr02	16323463	16328507	-
20	Os02t0477100-01	Hypothetical conserved gene.	chr02	16343270	16345584	-
21	Os02t0477300-01	Hypothetical conserved gene.	chr02	16347717	16350263	-
22	Os02t0477401-00	Conserved hypothetical protein.	chr02	16355893	16356705	-
23	Os02t0477700-01	Similar to Type II inositol-1,4,5-trisphosphate 5-phosphatase 12 (EC 3.1.3.36) (At5PTase12) (FRAGILE FIBER3 protein).	chr02	16360196	16364326	-		Endonuclease/exonuclease/phosphatase (IPR005135)
24	Os02t0478050-01	Similar to predicted protein.	chr02	16397680	16401544	-
25	Os02t0478300-00	Conserved hypothetical protein.	chr02	16414631	16415662	+
26	Os02t0478450-00	Conserved hypothetical protein.	chr02	16425253	16425567	-
27	Os02t0478500-01	Conserved hypothetical protein.	chr02	16426109	16430574	+
28	Os02t0478600-01	Similar to 40S ribosomal protein S15A.	chr02	16440267	16442384	+	Biological Process: translation (GO:0006412), Cellular Component: intracellular (GO:0005622), Cellular Component: ribosome (GO:0005840), Molecular Function: structural constituent of ribosome (GO:0003735)	Ribosomal protein S8 (IPR000630)
29	Os02t0478650-00	Non-protein coding transcript.	chr02	16441562	16442197	-
30	Os02t0478700-01	Ribosomal protein S27.	chr02	16445679	16447357	+	Biological Process: translation (GO:0006412), Cellular Component: intracellular (GO:0005622), Cellular Component: ribosome (GO:0005840), Molecular Function: structural constituent of ribosome (GO:0003735)	Ribosomal protein S27e (IPR000592), Ribosomal protein, zinc-binding domain (IPR011332), Ribosomal protein S27e, zinc-binding domain (IPR023407)
31	Os02t0478900-00	Similar to Splicing factor 3B subunit 1.	chr02	16450471	16453254	+	Molecular Function: binding (GO:0005488)	Armadillo-like helical (IPR011989), Splicing factor 3B subunit 1 (IPR015016), Armadillo-type fold (IPR016024), HEAT, type 2 (IPR021133)
32	Os02t0479100-00	Hypothetical protein.	chr02	16455174	16455736	+
33	Os02t0479300-01	Similar to RS21-C6 protein.	chr02	16465980	16468490	-		NTP pyrophosphohydrolase MazG, putative catalytic core (IPR004518)
34	Os02t0479700-00	Similar to Ulp1 protease family, C-terminal catalytic domain containing protein.	chr02	16476985	16482171	-
35	Os02t0480200-01	Hypothetical conserved gene.	chr02	16497236	16502221	-
36	Os02t0480466-00	Similar to Calcineurin B-like protein 02.	chr02	16503646	16507591	+
37	Os02t0480800-00	Similar to ATCBL3 (ARABIDOPSIS THALIANA CALCINEURIN B-LIKE 3); calcium ion binding.	chr02	16522375	16534304	+	Molecular Function: calcium ion binding (GO:0005509)	Calcium-binding EF-hand (IPR002048), EF-hand-like domain (IPR011992), EF-Hand 1, calcium-binding site (IPR018247), EF-hand (IPR018248), EF-HAND 2 (IPR018249)
38	Os02t0480900-03	Hypothetical conserved gene.	chr02	16537316	16541946	-
39	Os02t0480900-01	LsmAD domain domain containing protein.	chr02	16537356	16545691	-		LsmAD domain (IPR009604)
40	Os02t0480900-02	Hypothetical conserved gene.	chr02	16541138	16542199	-
41	Os02t0480950-00	Hypothetical protein.	chr02	16545412	16547806	+
42	Os02t0481000-01	Translation protein SH3-like domain containing protein.	chr02	16550282	16552919	-
				467706
				467.706

## Sheet: RM5641 to RM10890
Table S11 The details of putative candidate genes in the region of pleiotropic QTL			S13 Table. The details of putative candidate genes in the region of pleiotropic QTL
SNO	ID	Description	Chromosome	Start	End	Strand	GO	InterPro
1	Os01t0192300-01	Similar to I-box binding factor (Fragment).	chr01	4971466	4973555	-	Biological Process: regulation of transcription, DNA-dependent (GO:0006355), Molecular Function: nucleic acid binding (GO:0003676), Molecular Function: DNA binding (GO:0003677), Molecular Function: protein binding (GO:0005515), Molecular Function: zinc ion binding (GO:0008270)	SANT domain, DNA binding (IPR001005), Zinc finger, CCHC-type (IPR001878), Myb-like DNA-binding domain, SHAQKYF class (IPR006447), Homeodomain-like (IPR009057), Homeodomain-related (IPR012287), Myb, DNA-binding (IPR014778), Transcription regulator HTH, Myb-type, DNA-binding (IPR017930)
2	Os01t0192300-02	Hypothetical conserved gene.	chr01	4972739	4973373	-	Molecular Function: nucleic acid binding (GO:0003676), Molecular Function: zinc ion binding (GO:0008270)	Zinc finger, CCHC-type (IPR001878)
3	Os01t0192500-00	Similar to H0525G02.3 protein.	chr01	4979098	4980028	-	Biological Process: metal ion transport (GO:0030001), Molecular Function: metal ion binding (GO:0046872)	Heavy metal-associated domain, HMA (IPR006121)
4	Os01t0192401-00	Hypothetical gene.	chr01	4979116	4979875	+
5	Os01t0192550-01	Conserved hypothetical protein.	chr01	4980670	4981942	+
6	Os01t0192600-01	Ndr family protein.	chr01	4982182	4985143	-		Ndr (IPR004142), Pollen specific protein SF21 (IPR015511)
7	Os01t0192700-00	Non-protein coding transcript.	chr01	4982399	4985113	+
8	Os01t0192900-00	1-aminocyclopropane-1-carboxylate synthase family protein.	chr01	5002454	5004321	-	Biological Process: biosynthetic process (GO:0009058), Biological Process: 1-aminocyclopropane-1-carboxylate biosynthetic process (GO:0042218), Molecular Function: catalytic activity (GO:0003824), Molecular Function: transferase activity, transferring nitrogenous groups (GO:0016769), Molecular Function: 1-aminocyclopropane-1-carboxylate synthase activity (GO:0016847), Molecular Function: pyridoxa…	1-aminocyclopropane-1-carboxylate synthase (IPR001176), Aminotransferases, class-I, pyridoxal-phosphate-binding site (IPR004838), Aminotransferase, class I/classII (IPR004839), Pyridoxal phosphate-dependent transferase, major region, subdomain 2 (IPR015422), Pyridoxal phosphate-dependent transferase, major domain (IPR015424)
9	Os01t0193250-00	Hypothetical gene.	chr01	5014697	5015197	-
10	Os01t0193400-01	TNFR/CD27/30/40/95 cysteine-rich region domain containing protein.	chr01	5016279	5018651	+
11	Os01t0193400-02	TNFR/CD27/30/40/95 cysteine-rich region domain containing protein.	chr01	5016287	5017878	+
12	Os01t0193400-03	TNFR/CD27/30/40/95 cysteine-rich region domain containing protein.	chr01	5016351	5017845	+
13	Os01t0193400-04	Hypothetical gene.	chr01	5017893	5020150	+
14	Os01t0193500-00	Conserved hypothetical protein.	chr01	5018103	5020088	-
15	Os01t0193600-01	Methyltransferase small domain containing protein.	chr01	5021104	5025704	-	Biological Process: RNA processing (GO:0006396), Molecular Function: RNA binding (GO:0003723), Molecular Function: RNA methyltransferase activity (GO:0008173)	23S rRNA methyltransferase/RumA (IPR001566), Deoxyribonuclease/rho motif-related TRAM (IPR002792), (Uracil-5)-methyltransferase (IPR010280), Nucleic acid-binding, OB-fold-like (IPR016027)
16	Os01t0193700-00	Hypothetical protein.	chr01	5022112	5025748	+
17	Os01t0193900-01	Homeodomain-like domain containing protein.	chr01	5030157	5037142	+	Molecular Function: protein binding (GO:0005515)	Homeodomain-like (IPR009057), DIRP (IPR010561), Myb, DNA-binding (IPR014778), SANT, eukarya (IPR017884)
18	Os01t0193900-02	Hypothetical conserved gene.	chr01	5035823	5038482	+
19	Os01t0194000-02	Hypothetical conserved gene.	chr01	5037239	5038996	-
20	Os01t0194000-01	Conserved hypothetical protein.	chr01	5037406	5039252	-
21	Os01t0194200-01	IQ calmodulin-binding region domain containing protein.	chr01	5053133	5055753	-	Molecular Function: protein binding (GO:0005515)	IQ motif, EF-hand binding site (IPR000048)
22	Os01t0194300-01	Ankyrin-repeat protein, Herbivore-induced defense response, Blast disease resistance	chr01	5060605	5065209	-	Molecular Function: protein binding (GO:0005515)	SKP1/BTB/POZ domain (IPR011333), BTB/POZ domain (IPR000210), Regulatory protein NPR, central domain (IPR024228), Ankyrin repeat-containing domain (IPR020683), NPR1/NIM1-like, C-terminal (IPR021094), Ankyrin repeat (IPR002110)
23	Os01t0194600-02	Thioredoxin fold domain containing protein.	chr01	5085833	5086504	+	Biological Process: cell redox homeostasis (GO:0045454), Molecular Function: electron carrier activity (GO:0009055), Molecular Function: protein disulfide oxidoreductase activity (GO:0015035)	Glutaredoxin (IPR002109), Glutaredoxin-like, plant II (IPR011905), Thioredoxin-like fold (IPR012336)
24	Os01t0195000-01	Zinc finger, C2H2-type domain containing protein.	chr01	5099555	5102080	+	Cellular Component: intracellular (GO:0005622), Molecular Function: nucleic acid binding (GO:0003676), Molecular Function: zinc ion binding (GO:0008270)	Zinc finger, C2H2 (IPR007087), Zinc finger, C2H2-type/integrase, DNA-binding (IPR013087), Zinc finger, C2H2-like (IPR015880)
25	Os01t0195066-00	Non-protein coding transcript.	chr01	5102129	5102343	+
26	Os01t0195100-01	Non-protein coding transcript.	chr01	5103843	5108907	-
27	Os01t0195200-01	Similar to Serine/threonine-protein kinase PBS1 (EC 2.7.1.37) (AvrPphB susceptible protein 1).	chr01	5109949	5112457	-	Biological Process: protein phosphorylation (GO:0006468), Molecular Function: protein kinase activity (GO:0004672), Molecular Function: protein serine/threonine kinase activity (GO:0004674), Molecular Function: ATP binding (GO:0005524), Molecular Function: transferase activity, transferring phosphorus-containing groups (GO:0016772)	Protein kinase, catalytic domain (IPR000719), Serine/threonine-protein kinase, active site (IPR008271), Protein kinase-like domain (IPR011009), Protein kinase, ATP binding site (IPR017441), Serine/threonine-protein kinase-like domain (IPR017442)
28	Os01t0195300-00	Hypothetical conserved gene.	chr01	5128137	5128696	-
29	Os01t0195400-00	Harpin-induced 1 domain containing protein.	chr01	5131629	5132915	-		Late embryogenesis abundant protein, LEA-14 (IPR004864)
30	Os01t0195500-01	Translation initiation factor SUI1 domain containing protein.	chr01	5138518	5140925	-	Biological Process: translational initiation (GO:0006413), Molecular Function: translation initiation factor activity (GO:0003743)	Translation initiation factor SUI1 (IPR001950), Density-regulated protein DRP1 (IPR005873)
31	Os01t0195700-00	Hypothetical conserved gene.	chr01	5148879	5149201	+
32	Os01t0195801-00	Hypothetical conserved gene.	chr01	5149335	5150341	+		Helix-loop-helix DNA-binding (IPR011598)
33	Os01t0196133-00	Similar to H0315A08.1 protein.	chr01	5196418	5197056	+		Ribonuclease H1, N-terminal (IPR011320)
34	Os01t0196300-01	Basic helix-loop-helix (bHLH) transcription factor, Diterpenoid phytoalexin factor, Biosynthesis of diterpenoid phytoalexins, Stress response	chr01	5201862	5203996	+	Molecular Function: protein dimerization activity (GO:0046983)	Myc-type, basic helix-loop-helix (bHLH) domain (IPR011598)
35	Os01t0196500-01	Prenylated rab acceptor PRA1 family protein.	chr01	5213979	5216701	-		Prenylated rab acceptor PRA1 (IPR004895)
36	Os01t0196600-01	Similar to 260 kDa major acidic fibroblast growth factor-stimulated phosphoprotein (Fragment).	chr01	5218573	5220335	+	Biological Process: metabolic process (GO:0008152), Molecular Function: catalytic activity (GO:0003824)	Type I phosphodiesterase/nucleotide pyrophosphatase/phosphate transferase (IPR002591), Alkaline phosphatase-like, alpha/beta/alpha (IPR017849), Alkaline-phosphatase-like, core domain (IPR017850)
37	Os01t0196800-01	Hypothetical protein.	chr01	5227044	5229966	+
38	Os01t0197100-01	Cytochrome P450, Brassinosteroids biosynthesis, Regulation of plant architecture	chr01	5236623	5244023	+	Biological Process: oxidation-reduction process (GO:0055114), Molecular Function: iron ion binding oxidoreductase activity, acting on paired donors, with incorporation or reduction of molecular oxygen heme binding (GO:0020037)	Cytochrome P450 (IPR001128), Cytochrome P450, E-class, group I (IPR002401), Cytochrome P450, conserved site (IPR017972)
39	Os01t0197150-00	Hypothetical protein.	chr01	5236643	5243998	-
40	Os01t0197100-02	Cytochrome P450 (Splicing variant)	chr01	5238162	5244520	+	Biological Process: oxidation-reduction process (GO:0055114), Molecular Function: iron ion binding (GO:0005506), Molecular Function: oxidoreductase activity, acting on paired donors, with incorporation or reduction of molecular oxygen (GO:0016705), Molecular Function: heme binding (GO:0020037)	Cytochrome P450 (IPR001128), Cytochrome P450, E-class, group I (IPR002401), Cytochrome P450, conserved site (IPR017972)
41	Os01t0197200-01	Similar to predicted protein.	chr01	5247340	5251192	-	Molecular Function: nucleic acid binding (GO:0003676), Molecular Function: helicase activity (GO:0004386), Molecular Function: ATP binding (GO:0005524), Molecular Function: ATP-dependent helicase activity (GO:0008026)	RNA helicase, ATP-dependent, DEAD-box, conserved site (IPR000629), Helicase, C-terminal (IPR001650), DNA/RNA helicase, DEAD/DEAH box type, N-terminal (IPR011545), DEAD-like helicase (IPR014001), RNA helicase, DEAD-box type, Q motif (IPR014014)
42	Os01t0197350-00	Hypothetical genes.	chr01	5256634	5257053	+
43	Os01t0197400-01	Conserved hypothetical protein.	chr01	5258298	5260964	+
44	Os01t0197450-00	Pentatricopeptide repeat domain containing protein.	chr01	5261189	5263102	-	Molecular Function: binding (GO:0005488)	Pentatricopeptide repeat (IPR002885), Tetratricopeptide-like helical (IPR011990)
45	Os01t0197500-00	Similar to predicted protein.	chr01	5264691	5266158	-
46	Os01t0197700-01	Cytokinin oxidase/dehydrogenase, Regulation of grain production	chr01	5270449	5275585	-	Biological Process: cytokinin metabolic process (GO:0009690), Biological Process: oxidation-reduction process (GO:0055114), Molecular Function: catalytic activity (GO:0003824), Molecular Function: oxidoreductase activity (GO:0016491), Molecular Function: oxidoreductase activity, acting on CH-OH group of donors (GO:0016614), Molecular Function: cytokinin dehydrogenase activity (GO:0019139), Molecu…	FAD-binding, type 2, subdomain 1 (IPR016167), FAD-binding, type 2 (IPR016166), FAD linked oxidase, N-terminal (IPR006094), CO dehydrogenase flavoprotein-like, FAD-binding, subdomain 2 (IPR016169), FAD-linked oxidase-like, C-terminal (IPR016164), Cytokinin dehydrogenase 1, FAD/cytokinin binding domain (IPR015345), Vanillyl-alcohol oxidase/Cytokinin dehydrogenase C-terminal domain (IPR016170)
47	Os01t0197900-01	RNA-dependent RNA polymerase, eukaryotic-type domain containing protein.	chr01	5288136	5292958	-	Molecular Function: RNA-directed RNA polymerase activity (GO:0003968)	RNA-dependent RNA polymerase, eukaryotic-type (IPR007855)
48	Os01t0198000-01	RNA-dependent RNA polymerase, eukaryotic-type domain containing protein.	chr01	5307415	5317280	-	Molecular Function: RNA-directed RNA polymerase activity (GO:0003968)	RNA-dependent RNA polymerase, eukaryotic-type (IPR007855)
49	Os01t0198100-01	RNA-dependent RNA polymerase, eukaryotic-type domain containing protein.	chr01	5320625	5324478	-	Molecular Function: RNA-directed RNA polymerase activity (GO:0003968)	RNA-dependent RNA polymerase, eukaryotic-type (IPR007855)
50	Os01t0198200-03	Similar to predicted protein.	chr01	5329063	5332585	-
51	Os01t0198200-01	Similar to Casein kinase-like protein.	chr01	5329075	5335518	-	Biological Process: protein phosphorylation (GO:0006468), Molecular Function: protein kinase activity (GO:0004672), Molecular Function: protein serine/threonine kinase activity (GO:0004674), Molecular Function: ATP binding (GO:0005524), Molecular Function: transferase activity, transferring phosphorus-containing groups (GO:0016772)	Protein kinase, catalytic domain (IPR000719), Serine/threonine-protein kinase, active site (IPR008271), Protein kinase-like domain (IPR011009), Serine/threonine-protein kinase-like domain (IPR017442)
52	Os01t0198200-02	Similar to predicted protein.	chr01	5329096	5333540	-	Biological Process: protein phosphorylation (GO:0006468), Molecular Function: protein kinase activity (GO:0004672), Molecular Function: protein serine/threonine kinase activity (GO:0004674), Molecular Function: ATP binding (GO:0005524), Molecular Function: transferase activity, transferring phosphorus-containing groups (GO:0016772)	Protein kinase, catalytic domain (IPR000719), Serine/threonine-protein kinase, catalytic domain (IPR002290), Serine/threonine-protein kinase, active site (IPR008271), Protein kinase-like domain (IPR011009), Serine/threonine-protein kinase-like domain (IPR017442)
53	Os01t0198250-00	Hypothetical gene.	chr01	5330676	5333955	+
54	Os01t0198500-01	Conserved hypothetical protein.	chr01	5352505	5353607	-
55	Os01t0198702-01	Conserved hypothetical protein.	chr01	5361440	5362677	-
56	Os01t0198900-01	Polyketide cyclase/dehydrase domain containing protein.	chr01	5373630	5374681	+		Polyketide cyclase/dehydrase (IPR019587), START-like domain (IPR023393)
57	Os01t0198900-02	Polyketide cyclase/dehydrase domain containing protein.	chr01	5373712	5374663	+		Polyketide cyclase/dehydrase (IPR019587), START-like domain (IPR023393)
58	Os01t0199300-00	Similar to lachrymatory factor synthase.	chr01	5384196	5385088	+		Polyketide cyclase/dehydrase (IPR019587), START-like domain (IPR023393)
59	Os01t0199400-01	Alpha/beta hydrolase family protein.	chr01	5389837	5394412	-		Alpha/beta hydrolase fold-1 (IPR000073), Alpha/beta hydrolase, N-terminal (IPR022742)
60	Os01t0199400-02	Similar to predicted protein.	chr01	5389841	5393868	-		Alpha/beta hydrolase fold-1 (IPR000073)
61	Os01t0199550-00	Non-protein coding transcript.	chr01	5390090	5391282	+
62	Os01t0199700-00	Protein of unknown function DUF1677, plant domain containing protein.	chr01	5398321	5402018	-		Protein of unknown function DUF1677, plant (IPR012876)
63	Os01t0199900-01	Similar to Phosphoribosylaminoimidazole carboxylase catalytic subunit (EC 4.1.1.21) (AIR carboxylase) (AIRC).	chr01	5406050	5412737	+	Biological Process: 'de novo' IMP biosynthetic process (GO:0006189), Molecular Function: catalytic activity (GO:0003824), Molecular Function: phosphoribosylaminoimidazole carboxylase activity (GO:0004638), Molecular Function: ATP binding (GO:0005524), Molecular Function: ligase activity (GO:0016874), Molecular Function: metal ion binding (GO:0046872)	Phosphoribosylaminoimidazole carboxylase, core (IPR000031), ATP-grasp fold, ATP-dependent carboxylate-amine ligase-type (IPR003135), Phosphoribosylaminoimidazole carboxylase, ATPase subunit (IPR005875), Rudiment single hybrid motif (IPR011054), ATP-grasp fold (IPR011761), ATP-grasp fold, subdomain 1 (IPR013815), ATP-grasp fold, subdomain 2 (IPR013816), Pre-ATP-grasp fold (IPR013817), PreATP-grasp…
64	Os01t0199950-00	Hypothetical gene.	chr01	5410930	5412355	-
65	Os01t0200000-01	Similar to autophagocytosis protein AUT1-like [Oryza sativa (japonica cultivar-group)].	chr01	5413595	5416778	-		Autophagy-related protein 3, N-terminal (IPR007134), Autophagy-related protein 3 (IPR007135), Autophagy-related protein 3, C-terminal (IPR019461)
66	Os01t0200150-00	Hypothetical gene.	chr01	5414253	5416534	+
67	Os01t0200200-00	Protein of unknown function DUF1677, plant domain containing protein.	chr01	5424059	5424581	+		Protein of unknown function DUF1677, plant (IPR012876)
68	Os01t0200300-01	Similar to Homeobox-leucine zipper protein HOX29.	chr01	5426582	5429390	-		MEKHLA (IPR013978)
69	Os01t0200350-00	Hypothetical protein.	chr01	5426719	5431404	+
70	Os01t0200400-01	Thioredoxin domain 2 containing protein.	chr01	5435443	5442646	-		Thioredoxin-like fold (IPR012336)
71	Os01t0200500-01	MPPN family protein.	chr01	5442866	5446246	+		MPPN (IPR007846), Nucleoporin, NUP53 (IPR017389)
72	Os01t0200600-01	Similar to Avr9/Cf-9 rapidly elicited protein 111A.	chr01	5454772	5455667	-	Biological Process: regulation of transcription, DNA-dependent (GO:0006355), Molecular Function: DNA binding (GO:0003677), Molecular Function: sequence-specific DNA binding transcription factor activity (GO:0003700)	Pathogenesis-related transcriptional factor/ERF, DNA-binding (IPR001471), DNA-binding, integrase-type (IPR016177)
73	Os01t0200700-01	Similar to Metallothionein-like protein type 3 (MT-3) (MWMT3).	chr01	5478545	5479749	+
74	Os01t0200950-00	Non-protein coding transcript.	chr01	5497443	5498906	-
75	Os01t0201000-01	Similar to protein kinase family protein.	chr01	5498215	5499226	+
76	Os01t0201100-01	Similar to xylosyltransferase oxt.	chr01	5507567	5509494	+	Cellular Component: membrane (GO:0016020), Molecular Function: acetylglucosaminyltransferase activity (GO:0008375)	Glycosyl transferase, family 14 (IPR003406)
77	Os01t0201200-01	Similar to Protein kinase.	chr01	5510522	5514454	-	Biological Process: protein phosphorylation (GO:0006468), Molecular Function: protein kinase activity (GO:0004672), Molecular Function: protein serine/threonine kinase activity (GO:0004674), Molecular Function: ATP binding (GO:0005524), Molecular Function: transferase activity, transferring phosphorus-containing groups (GO:0016772)	Protein kinase, catalytic domain (IPR000719), Serine-threonine/tyrosine-protein kinase (IPR001245), Serine/threonine-protein kinase, active site (IPR008271), Protein kinase-like domain (IPR011009), Serine/threonine-protein kinase-like domain (IPR017442)
78	Os01t0201250-00	Similar to DNA-binding WRKY.	chr01	5529876	5531014	-		VQ (IPR008889)
79	Os01t0201275-00	Conserved hypothetical protein.	chr01	5530408	5531111	+
80	Os01t0201300-00	Non-protein coding transcript.	chr01	5533238	5534034	+
81	Os01t0201400-01	Rapid ALkalinization Factor family protein.	chr01	5540631	5541520	-		Rapid ALkalinization Factor (IPR008801)
82	Os01t0201500-00	Similar to early nodulin 20.	chr01	5543648	5544544	-		Cupredoxin (IPR008972)
83	Os01t0201600-01	Virulence factor, pectin lyase fold family protein.	chr01	5549651	5551003	-
84	Os01t0201600-02	Non-protein coding transcript.	chr01	5549651	5549759	-
85	Os01t0201700-01	Similar to M23 protein (Fragment).	chr01	5559532	5568924	-	Molecular Function: DNA binding (GO:0003677), Molecular Function: protein dimerization activity (GO:0046983)	Transcription factor, MADS-box (IPR002100)
86	Os01t0201700-02	Transcription factor, Floral organ development, Lodicule development, Stamen specification, Floral meristem determinacy, Male reproductive development	chr01	5560202	5568844	-	Biological Process: regulation of transcription, DNA-templated (GO:0006355), Molecular Function: DNA binding (GO:0003677), Molecular Function: sequence-specific DNA binding transcription factor activity (GO:0003700), Molecular Function: protein dimerization activity (GO:0046983), Cellular Component: nucleus (GO:0005634)	Transcription factor, MADS-box (IPR002100), Transcription factor, K-box (IPR002487)
87	Os01t0201750-01	Non-protein coding transcript.	chr01	5568902	5572385	+
88	Os01t0201800-00	Hypothetical conserved gene.	chr01	5579959	5585078	-
89	Os01t0201850-01	Hypothetical conserved gene.	chr01	5581650	5588943	+
90	Os01t0201900-01	Conserved hypothetical protein.	chr01	5591697	5596237	-
91	Os01t0202500-01	Similar to B-box zinc finger family protein.	chr01	5639835	5641475	+	Cellular Component: intracellular (GO:0005622), Molecular Function: zinc ion binding (GO:0008270)	Zinc finger, B-box (IPR000315)
92	Os01t0202601-00	Conserved hypothetical protein.	chr01	5645689	5646994	+
93	Os01t0202700-00	Similar to Flowering locus T3.	chr01	5652593	5655352	+		Phosphatidylethanolamine-binding protein PEBP (IPR008914)
94	Os01t0202800-00	Similar to NOD26-like membrane integral protein ZmNIP1-1.	chr01	5663306	5665832	-	Biological Process: transport (GO:0006810), Biological Process: water transport (GO:0006833), Biological Process: transmembrane transport (GO:0055085), Cellular Component: membrane (GO:0016020), Cellular Component: integral to membrane (GO:0016021), Molecular Function: transporter activity (GO:0005215)	Major intrinsic protein (IPR000425), Aquaporin (IPR012269), Major intrinsic protein, conserved site (IPR022357), Aquaporin-like (IPR023271)
95	Os01t0203000-01	BZR1, transcriptional repressor family protein.	chr01	5669291	5671467	-		BZR1, transcriptional repressor (IPR008540)
96	Os01t0203300-01	Conserved hypothetical protein.	chr01	5675669	5679548	-
97	Os01t0203400-01	Hypothetical protein.	chr01	5685594	5686401	+
98	Os01t0203800-01	Protein of unknown function DUF641, plant domain containing protein.	chr01	5699652	5707756	-		Domain of unknown function DUF641, plant (IPR006943)
99	Os01t0203800-02	Protein of unknown function DUF641, plant domain containing protein.	chr01	5699653	5701472	-		Domain of unknown function DUF641, plant (IPR006943)
100	Os01t0203900-00	Hypothetical protein.	chr01	5699710	5701591	+
101	Os01t0204000-01	DNA polymerase subunit Cdc27 domain containing protein.	chr01	5718902	5724184	-	Biological Process: DNA replication (GO:0006260), Cellular Component: nucleus (GO:0005634)	DNA polymerase subunit Cdc27 (IPR019038)
102	Os01t0204000-02	Hypothetical conserved gene.	chr01	5718902	5723471	-	Biological Process: DNA replication (GO:0006260), Cellular Component: nucleus (GO:0005634)	DNA polymerase subunit Cdc27 (IPR019038)
103	Os01t0205100-01	WD40 repeat-like domain containing protein.	chr01	5760486	5764602	+	Molecular Function: protein binding (GO:0005515)	WD40 repeat (IPR001680), WD40 repeat-like-containing domain (IPR011046), WD40/YVTN repeat-like-containing domain (IPR015943), WD40-repeat-containing domain (IPR017986), WD40 repeat, conserved site (IPR019775), WD40 repeat, subgroup (IPR019781), WD40 repeat 2 (IPR019782)
104	Os01t0205200-01	Pentatricopeptide repeat domain containing protein.	chr01	5764652	5766659	-	Molecular Function: binding (GO:0005488)	Pentatricopeptide repeat (IPR002885), Tetratricopeptide-like helical (IPR011990)
105	Os01t0205300-00	Similar to rho termination factor, N-terminal domain containing protein.	chr01	5768175	5769203	+	Biological Process: transcription termination, DNA-dependent (GO:0006353)	Rho termination factor, N-terminal (IPR011112)
106	Os01t0205401-00	Non-protein coding transcript.	chr01	5769842	5769914	+
107	Os01t0205500-01	Similar to 60S ribosomal protein L11-2 (L16). Splice isoform 2.	chr01	5770062	5772270	+	Biological Process: translation (GO:0006412), Cellular Component: intracellular (GO:0005622), Cellular Component: ribosome (GO:0005840), Molecular Function: structural constituent of ribosome (GO:0003735)	Ribosomal protein L5 (IPR002132), Ribosomal protein L5, conserved site (IPR020929), Ribosomal protein L5 domain (IPR022803)
108	Os01t0205550-00	Non-protein coding transcript.	chr01	5770252	5772046	-
109	Os01t0205600-01	Crotonase, core domain containing protein.	chr01	5773300	5774176	+	Biological Process: metabolic process (GO:0008152), Molecular Function: catalytic activity (GO:0003824)	Crotonase, core (IPR001753)
110	Os01t0205700-01	Similar to Shaggy-like kinase (Fragment).	chr01	5774293	5776922	-	Biological Process: protein phosphorylation (GO:0006468), Molecular Function: protein kinase activity (GO:0004672), Molecular Function: protein serine/threonine kinase activity (GO:0004674), Molecular Function: ATP binding (GO:0005524), Molecular Function: transferase activity, transferring phosphorus-containing groups (GO:0016772)	Protein kinase, catalytic domain (IPR000719), Serine/threonine-protein kinase, active site (IPR008271), Protein kinase-like domain (IPR011009), Serine/threonine-protein kinase-like domain (IPR017442)
111	Os01t0205800-00	Non-protein coding transcript.	chr01	5774960	5778040	+
112	Os01t0205900-01	Similar to Class III peroxidase GvPx2b (Fragment).	chr01	5789333	5790735	+	Biological Process: response to oxidative stress (GO:0006979), Biological Process: oxidation-reduction process (GO:0055114), Molecular Function: peroxidase activity (GO:0004601), Molecular Function: heme binding (GO:0020037)	Plant peroxidase (IPR000823), Haem peroxidase, plant/fungal/bacterial (IPR002016), Haem peroxidase (IPR010255), Peroxidases heam-ligand binding site (IPR019793), Peroxidase, active site (IPR019794)
113	Os01t0205900-02	Similar to Class III peroxidase GvPx2b (Fragment).	chr01	5789426	5790753	+	Biological Process: response to oxidative stress (GO:0006979), Biological Process: oxidation-reduction process (GO:0055114), Molecular Function: peroxidase activity (GO:0004601), Molecular Function: heme binding (GO:0020037)	Plant peroxidase (IPR000823), Haem peroxidase, plant/fungal/bacterial (IPR002016), Haem peroxidase (IPR010255), Peroxidases heam-ligand binding site (IPR019793), Peroxidase, active site (IPR019794)
114	Os01t0206200-01	Conserved hypothetical protein.	chr01	5794832	5797674	-
115	Os01t0206300-00	Similar to CBL-interacting protein kinase 18.	chr01	5799607	5801142	+	Biological Process: protein phosphorylation (GO:0006468), Biological Process: signal transduction (GO:0007165), Molecular Function: protein kinase activity (GO:0004672), Molecular Function: protein serine/threonine kinase activity (GO:0004674), Molecular Function: ATP binding (GO:0005524), Molecular Function: transferase activity, transferring phosphorus-containing groups (GO:0016772)	Protein kinase, catalytic domain (IPR000719), Serine/threonine-protein kinase, catalytic domain (IPR002290), NAF domain (IPR004041), Serine/threonine-protein kinase, active site (IPR008271), Protein kinase-like domain (IPR011009), Protein kinase, ATP binding site (IPR017441), Serine/threonine-protein kinase-like domain (IPR017442), NAF/FISL domain (IPR018451)
116	Os01t0206600-01	Conserved hypothetical protein.	chr01	5807990	5808568	+
117	Os01t0206650-00	Hypothetical protein.	chr01	5809141	5811560	+
118	Os01t0206700-01	Similar to Serine/threonine protein kinase (CBL-interacting protein kinase 20).	chr01	5809589	5811510	-	Biological Process: protein phosphorylation (GO:0006468), Biological Process: signal transduction (GO:0007165), Molecular Function: protein kinase activity (GO:0004672), Molecular Function: protein serine/threonine kinase activity (GO:0004674), Molecular Function: protein tyrosine kinase activity (GO:0004713), Molecular Function: ATP binding (GO:0005524), Molecular Function: transferase activity,…	Protein kinase, catalytic domain (IPR000719), Serine/threonine-protein kinase, catalytic domain (IPR002290), NAF domain (IPR004041), Serine/threonine-protein kinase, active site (IPR008271), Protein kinase-like domain (IPR011009), Protein kinase, ATP binding site (IPR017441), Serine/threonine-protein kinase-like domain (IPR017442), NAF/FISL domain (IPR018451), Tyrosine-protein kinase, catalytic d…
119	Os01t0206700-03	Similar to Serine/threonine protein kinase (CBL-interacting protein kinase 20).	chr01	5809589	5811389	-	Biological Process: protein phosphorylation (GO:0006468), Biological Process: signal transduction (GO:0007165), Molecular Function: protein kinase activity (GO:0004672), Molecular Function: protein serine/threonine kinase activity (GO:0004674), Molecular Function: protein tyrosine kinase activity (GO:0004713), Molecular Function: ATP binding (GO:0005524), Molecular Function: transferase activity,…	Protein kinase, catalytic domain (IPR000719), Serine/threonine-protein kinase, catalytic domain (IPR002290), NAF domain (IPR004041), Serine/threonine-protein kinase, active site (IPR008271), Protein kinase-like domain (IPR011009), Protein kinase, ATP binding site (IPR017441), Serine/threonine-protein kinase-like domain (IPR017442), NAF/FISL domain (IPR018451), Tyrosine-protein kinase, catalytic d…
120	Os01t0206700-02	Similar to cDNA clone:J013031K24, full insert sequence.	chr01	5809595	5810655	-	Biological Process: protein phosphorylation (GO:0006468), Biological Process: signal transduction (GO:0007165), Molecular Function: protein kinase activity (GO:0004672), Molecular Function: ATP binding (GO:0005524), Molecular Function: transferase activity, transferring phosphorus-containing groups (GO:0016772)	Protein kinase, catalytic domain (IPR000719), NAF domain (IPR004041), Protein kinase-like domain (IPR011009), Serine/threonine-protein kinase-like domain (IPR017442), NAF/FISL domain (IPR018451)
121	Os01t0206800-01	Protein kinase, core domain containing protein.	chr01	5814827	5819207	-	Biological Process: protein phosphorylation (GO:0006468), Molecular Function: protein kinase activity (GO:0004672), Molecular Function: protein binding (GO:0005515), Molecular Function: ATP binding (GO:0005524), Molecular Function: transferase activity, transferring phosphorus-containing groups (GO:0016772)	Protein kinase, catalytic domain (IPR000719), Serine-threonine/tyrosine-protein kinase (IPR001245), Leucine-rich repeat (IPR001611), Protein kinase-like domain (IPR011009), Leucine-rich repeat-containing N-terminal, type 2 (IPR013210)
122	Os01t0207001-00	Hypothetical protein.	chr01	5815059	5819001	+
123	Os01t0207200-01	Similar to Peptide-N4-(N-acetyl-beta-glucosaminyl)asparagine amidase A (EC 3.5.1.52) (PNGase A) (Glycopeptide N-glycosidase) (N-glycanase) [Contains: Peptide-N4-(N-acetyl-beta-glucosaminyl)asparagine amidase A light chain (PNGase A small chain) (PNGase A subunit B); Peptide-N4- (N-acetyl-beta-glucosaminyl)asparagine amidase A heavy chain (PNGase A large chain) (PNGase A subunit A)].	chr01	5828556	5830828	-		Peptide-N4-(N-acetyl-beta-glucosaminyl)asparagine amidase A (IPR021102)
124	Os01t0207300-00	Similar to S-adenosylmethionine synthetase 1 (EC 2.5.1.6) (Methionine adenosyltransferase 1) (AdoMet synthetase 1). Splice isoform 2.	chr01	5833613	5834107	-	Biological Process: S-adenosylmethionine biosynthetic process (GO:0006556), Molecular Function: methionine adenosyltransferase activity (GO:0004478), Molecular Function: ATP binding (GO:0005524)	S-adenosylmethionine synthetase (IPR002133), S-adenosylmethionine synthetase, N-terminal (IPR022628), S-adenosylmethionine synthetase, central domain (IPR022629), S-adenosylmethionine synthetase, conserved site (IPR022631), S-adenosylmethionine synthetase superfamily (IPR022636)
125	Os01t0207400-01	Similar to peptide-N4-asparagine amidase A.	chr01	5837660	5838639	-		Peptide-N4-(N-acetyl-beta-glucosaminyl)asparagine amidase A (IPR021102)
126	Os01t0207500-01	Hypothetical protein.	chr01	5841728	5843767	+
127	Os01t0207600-00	Similar to peptide-N4-asparagine amidase A.	chr01	5841736	5843671	-		Peptide-N4-(N-acetyl-beta-glucosaminyl)asparagine amidase A (IPR021102)
128	Os01t0207700-00	Drug/metabolite transporter domain containing protein.	chr01	5848166	5848945	+	Cellular Component: membrane (GO:0016020)	Drug/metabolite transporter (IPR000620)
129	Os01t0207900-00	Similar to nodulin-like protein.	chr01	5856444	5857920	+	Cellular Component: membrane (GO:0016020)	Drug/metabolite transporter (IPR000620)
130	Os01t0208000-01	Protein of unknown function DUF6, transmembrane domain containing protein.	chr01	5862946	5863577	+	Cellular Component: membrane (GO:0016020)	Drug/metabolite transporter (IPR000620)
131	Os01t0208400-01	Similar to peptide-N4-asparagine amidase A.	chr01	5875794	5877849	-		Peptide-N4-(N-acetyl-beta-glucosaminyl)asparagine amidase A (IPR021102)
132	Os01t0208600-01	SCAR-like protein 2, Component of the suppressor of cAMP receptor/Wiskott-Aldrich syndrome protein family verprolin-homologous (SCAR/WAVE) complex, Actin organization, Panicle development, Regulation of water loss	chr01	5890605	5898131	+	Biological Process: actin cytoskeleton organization (GO:0030036), Molecular Function: actin binding (GO:0003779), Cellular Component: cytoskeleton (GO:0005856)	SCAR/WAVE family (IPR028288), WH2 domain (IPR003124)
133	Os01t0208600-02	Actin-binding WH2 domain containing protein.	chr01	5894496	5898181	+	Molecular Function: protein binding (GO:0005515)	Actin-binding WH2 (IPR003124)
134	Os01t0208600-03	Actin-binding WH2 domain containing protein.	chr01	5896933	5898224	+	Molecular Function: protein binding (GO:0005515)	Actin-binding WH2 (IPR003124)
135	Os01t0208700-01	Similar to Phosphoenolpyruvate carboxylase (Fragment).	chr01	5899561	5909560	+	Biological Process: tricarboxylic acid cycle (GO:0006099), Biological Process: carbon fixation (GO:0015977), Molecular Function: catalytic activity (GO:0003824), Molecular Function: phosphoenolpyruvate carboxylase activity (GO:0008964)	Pyruvate/Phosphoenolpyruvate kinase (IPR015813), Phosphoenolpyruvate carboxylase, active site (IPR018129), Phosphoenolpyruvate carboxylase (IPR021135)
136	Os01t0208800-01	Similar to Phosphoenolpyruvate carboxylase (Fragment).	chr01	5907081	5908615	-
137	Os01t0209000-01	Alg9-like mannosyltransferase family protein.	chr01	5911506	5916779	+	Biological Process: GPI anchor biosynthetic process (GO:0006506), Cellular Component: intrinsic to endoplasmic reticulum membrane (GO:0031227), Molecular Function: transferase activity, transferring glycosyl groups (GO:0016757)	GPI mannosyltransferase (IPR005599)
138	Os01t0209000-02	Alg9-like mannosyltransferase family protein.	chr01	5911625	5916627	+	Biological Process: GPI anchor biosynthetic process (GO:0006506), Cellular Component: intrinsic to endoplasmic reticulum membrane (GO:0031227), Molecular Function: transferase activity, transferring glycosyl groups (GO:0016757)	GPI mannosyltransferase (IPR005599)
139	Os01t0209150-01	Hypothetical gene.	chr01	5920696	5921382	-
140	Os01t0209200-01	Similar to 14-3-3 protein 7.	chr01	5921759	5934109	+	Molecular Function: protein domain specific binding (GO:0019904)	14-3-3 protein (IPR000308), 14-3-3 domain (IPR023410)
141	Os01t0209300-00	Non-protein coding transcript.	chr01	5932028	5933355	-
142	Os01t0209400-01	Nucleotide-binding, alpha-beta plait domain containing protein.	chr01	5934586	5939516	-	Molecular Function: nucleotide binding (GO:0000166), Molecular Function: nucleic acid binding (GO:0003676)	RNA recognition motif domain (IPR000504), Ataxin-2, C-terminal (IPR009818), Nucleotide-binding, alpha-beta plait (IPR012677)
143	Os01t0209500-01	Zinc finger, RING-type domain containing protein.	chr01	5945633	5954315	-	Molecular Function: protein binding (GO:0005515), Molecular Function: zinc ion binding (GO:0008270)	Zinc finger, RING-type (IPR001841), Zinc finger, RING/FYVE/PHD-type (IPR013083)
144	Os01t0209566-00	Hypothetical protein.	chr01	5945746	5946990	+
145	Os01t0209700-01	Similar to GA 2-oxidase 5.	chr01	5968819	5972489	-	Biological Process: oxidation-reduction process (GO:0055114), Molecular Function: oxidoreductase activity (GO:0016491), Molecular Function: oxidoreductase activity, acting on paired donors, with incorporation or reduction of molecular oxygen, 2-oxoglutarate as one donor, and incorporation of one atom each of oxygen into both donors (GO:0016706)	Oxoglutarate/iron-dependent oxygenase (IPR005123)
146	Os01t0209750-00	Hypothetical protein.	chr01	5969790	5972419	+
147	Os01t0209800-02	Similar to Cationic amino acid transporter (Fragment).	chr01	5983626	5985833	-	Biological Process: amino acid transmembrane transport (GO:0003333), Biological Process: transport (GO:0006810), Biological Process: transmembrane transport (GO:0055085), Cellular Component: membrane (GO:0016020), Molecular Function: amino acid transmembrane transporter activity (GO:0015171)	Amino acid/polyamine transporter I (IPR002293), Amino acid permease domain (IPR004841), Cationic amino acid transporter (IPR015606)
148	Os01t0209800-01	Similar to Cationic amino acid transporter (Fragment).	chr01	5983713	5985875	-	Biological Process: amino acid transmembrane transport (GO:0003333), Biological Process: transport (GO:0006810), Biological Process: transmembrane transport (GO:0055085), Cellular Component: membrane (GO:0016020), Molecular Function: amino acid transmembrane transporter activity (GO:0015171)	Amino acid/polyamine transporter I (IPR002293), Amino acid permease domain (IPR004841), Cationic amino acid transporter (IPR015606)
149	Os01t0209901-00	Hypothetical protein.	chr01	5983849	5985803	+
150	Os01t0210200-00	Similar to Myb-like DNA-binding domain containing protein, expressed.	chr01	6000333	6000920	-	Biological Process: regulation of transcription, DNA-dependent (GO:0006355), Molecular Function: DNA binding (GO:0003677), Molecular Function: protein binding (GO:0005515)	SANT domain, DNA binding (IPR001005), Homeodomain-like (IPR009057), Homeodomain-related (IPR012287), Myb, DNA-binding (IPR014778), Myb transcription factor (IPR015495), MYB-like (IPR017877), Transcription regulator HTH, Myb-type, DNA-binding (IPR017930)
151	Os01t0210300-01	Conserved hypothetical protein.	chr01	6003524	6004869	+
152	Os01t0210400-00	Protein of unknown function DUF616 domain containing protein.	chr01	6005040	6007163	-		Protein of unknown function DUF616 (IPR006852)
153	Os01t0210500-01	Similar to SOUL-like protein.	chr01	6007921	6009027	-		SOUL haem-binding protein (IPR006917), Regulatory factor, effector, bacterial (IPR011256)
154	Os01t0210550-00	Hypothetical gene.	chr01	6008725	6009183	+
155	Os01t0210600-02	Protein of unknown function DUF538 family protein.	chr01	6010862	6011818	-
156	Os01t0210700-01	Similar to Potassium channel (Fragment).	chr01	6017742	6022122	-	Biological Process: ion transport (GO:0006811), Biological Process: transmembrane transport (GO:0055085), Cellular Component: membrane (GO:0016020), Molecular Function: ion channel activity (GO:0005216)	Cyclic nucleotide-binding domain (IPR000595), Ion transport (IPR005821), RmlC-like jelly roll fold (IPR014710), Cyclic nucleotide-binding-like (IPR018490), Potassium channel, plant-type (IPR021789)
157	Os01t0210700-02	Inward rectifying shaker-like potassium channel	chr01	6017745	6022156	-	Biological Process: ion transport (GO:0006811), Biological Process: potassium ion transport (GO:0006813), Biological Process: transmembrane transport (GO:0055085), Molecular Function: ion channel activity (GO:0005216), Molecular Function: voltage-gated potassium channel activity (GO:0005249), Cellular Component: membrane (GO:0016020)	Potassium channel, voltage-dependent, EAG/ELK/ERG (IPR003938), Ion transport domain (IPR005821), RmlC-like jelly roll fold (IPR014710), Cyclic nucleotide-binding-like (IPR018490), Cyclic nucleotide-binding domain (IPR000595), KHA domain (IPR021789)
158	Os01t0210750-00	Hypothetical protein.	chr01	6017896	6022072	+
159	Os01t0210800-01	Conserved hypothetical protein.	chr01	6025074	6029638	+
160	Os01t0210900-01	Cytochrome P450 family protein.	chr01	6031025	6032833	-	Biological Process: oxidation-reduction process (GO:0055114), Molecular Function: monooxygenase activity (GO:0004497), Molecular Function: iron ion binding (GO:0005506), Molecular Function: electron carrier activity (GO:0009055), Molecular Function: oxidoreductase activity, acting on paired donors, with incorporation or reduction of molecular oxygen (GO:0016705), Molecular Function: heme binding …	Cytochrome P450 (IPR001128), Cytochrome P450, E-class, group IV (IPR002403), Cytochrome P450, conserved site (IPR017972)
161	Os01t0211000-00	Cytochrome P450 family protein.	chr01	6037454	6039022	-	Biological Process: oxidation-reduction process (GO:0055114), Molecular Function: iron ion binding (GO:0005506), Molecular Function: electron carrier activity (GO:0009055), Molecular Function: oxidoreductase activity, acting on paired donors, with incorporation or reduction of molecular oxygen (GO:0016705), Molecular Function: heme binding (GO:0020037)	Cytochrome P450 (IPR001128), Cytochrome P450, E-class, group I (IPR002401), Cytochrome P450, conserved site (IPR017972)
162	Os01t0211200-00	Cytochrome P450 family protein.	chr01	6057440	6058954	-	Biological Process: oxidation-reduction process (GO:0055114), Molecular Function: iron ion binding (GO:0005506), Molecular Function: electron carrier activity (GO:0009055), Molecular Function: oxidoreductase activity, acting on paired donors, with incorporation or reduction of molecular oxygen (GO:0016705), Molecular Function: heme binding (GO:0020037)	Cytochrome P450 (IPR001128), Cytochrome P450, E-class, group I (IPR002401), Cytochrome P450, conserved site (IPR017972)
163	Os01t0211400-00	Non-protein coding transcript.	chr01	6063140	6063607	-
164	Os01t0211600-01	Cytochrome P450 family protein.	chr01	6076731	6078239	-	Biological Process: oxidation-reduction process (GO:0055114), Molecular Function: monooxygenase activity (GO:0004497), Molecular Function: iron ion binding (GO:0005506), Molecular Function: electron carrier activity (GO:0009055), Molecular Function: oxidoreductase activity, acting on paired donors, with incorporation or reduction of molecular oxygen (GO:0016705), Molecular Function: heme binding …	Cytochrome P450 (IPR001128), Cytochrome P450, E-class, group IV (IPR002403), Cytochrome P450, conserved site (IPR017972)
165	Os01t0211800-01	Similar to VirE2-interacting protein VIP1.	chr01	6094692	6096528	-	Biological Process: regulation of transcription, DNA-dependent (GO:0006355), Molecular Function: sequence-specific DNA binding transcription factor activity (GO:0003700), Molecular Function: sequence-specific DNA binding (GO:0043565), Molecular Function: protein dimerization activity (GO:0046983)	Basic-leucine zipper (bZIP) transcription factor (IPR004827), Basic leucine zipper (IPR011700)
166	Os01t0212000-01	Hypothetical protein.	chr01	6109134	6109760	+
167	Os01t0212100-01	DEAD-like helicase, N-terminal domain containing protein.	chr01	6112811	6125509	+	Molecular Function: nucleic acid binding (GO:0003676), Molecular Function: helicase activity (GO:0004386), Molecular Function: ATP binding (GO:0005524), Molecular Function: ATP-dependent helicase activity (GO:0008026)	Helicase, C-terminal (IPR001650), DNA/RNA helicase, ATP-dependent, DEAH-box type, conserved site (IPR002464), Helicase-associated domain (IPR007502), Domain of unknown function DUF1605 (IPR011709), DEAD-like helicase (IPR014001)
168	Os01t0212100-02	Similar to P20Sh148J07 (Fragment).	chr01	6112846	6132696	+	Molecular Function: nucleic acid binding (GO:0003676), Molecular Function: helicase activity (GO:0004386), Molecular Function: ATP binding (GO:0005524), Molecular Function: ATP-dependent helicase activity (GO:0008026)	Helicase, C-terminal (IPR001650), DNA/RNA helicase, ATP-dependent, DEAH-box type, conserved site (IPR002464), DEAD-like helicase (IPR014001)
169	Os01t0212400-01	EF-Hand type domain containing protein.	chr01	6134203	6139136	+	Biological Process: transmembrane transport (GO:0055085), Cellular Component: integral to membrane (GO:0016021), Molecular Function: calcium ion binding (GO:0005509)	Calcium-binding EF-hand (IPR002048), Sodium/calcium exchanger membrane region (IPR004837), EF-hand-like domain (IPR011992), EF-Hand 1, calcium-binding site (IPR018247), EF-HAND 2 (IPR018249)
170	Os01t0212500-01	Conserved hypothetical protein.	chr01	6139624	6141644	-
171	Os01t0212700-01	Similar to RING-H2 finger protein ATL2K.	chr01	6172143	6173186	-	Molecular Function: protein binding (GO:0005515), Molecular Function: zinc ion binding (GO:0008270)	Zinc finger, RING-type (IPR001841), Zinc finger, RING/FYVE/PHD-type (IPR013083), Zinc finger, RING-H2-type (IPR024766)
172	Os01t0212900-00	Hypothetical conserved gene.	chr01	6182929	6183873	+
173	Os01t0213100-00	Similar to Zinc finger, C3HC4 type family protein.	chr01	6185622	6189219	-	Molecular Function: protein binding (GO:0005515), Molecular Function: zinc ion binding (GO:0008270)	Zinc finger, RING-type (IPR001841), Zinc finger, RING/FYVE/PHD-type (IPR013083), Zinc finger, C3HC4 RING-type (IPR018957), Zinc finger, RING-H2-type (IPR024766)
174	Os01t0213300-00	Transcription factor, MADS-box domain containing protein.	chr01	6191927	6193745	+	Molecular Function: DNA binding (GO:0003677), Molecular Function: protein dimerization activity (GO:0046983)	Transcription factor, MADS-box (IPR002100)
175	Os01t0213350-01	Hypothetical gene.	chr01	6195350	6199436	+
176	Os01t0213400-01	Zinc finger, RING/FYVE/PHD-type domain containing protein.	chr01	6199245	6200202	-	Molecular Function: protein binding (GO:0005515), Molecular Function: zinc ion binding (GO:0008270)	Zinc finger, RING-type (IPR001841), Zinc finger, RING/FYVE/PHD-type (IPR013083), Zinc finger, RING-H2-type (IPR024766)
177	Os01t0213800-01	Plant-specific transcription factor, miR319 target gene	chr01	6221640	6224242	-		Transcription factor, TCP (IPR005333), Transcription factor TCP subgroup (IPR017887)
178	Os01t0214001-00	Hypothetical protein.	chr01	6221644	6224197	+
179	Os01t0214200-01	Esterase, SGNH hydrolase-type, subgroup domain containing protein.	chr01	6242516	6244879	-	Biological Process: lipid metabolic process (GO:0006629), Molecular Function: hydrolase activity (GO:0016787), Molecular Function: hydrolase activity, acting on ester bonds (GO:0016788)	Lipase, GDSL (IPR001087), Esterase, SGNH hydrolase-type (IPR013830), Esterase, SGNH hydrolase-type, subgroup (IPR013831)
180	Os01t0214300-01	Conserved hypothetical protein.	chr01	6248293	6253373	+
181	Os01t0214400-01	Similar to predicted protein.	chr01	6253793	6256906	+		Protein of unknown function DUF455 (IPR007402), Uncharacterised conserved protein UCP012318 (IPR011197)
182	Os01t0214500-01	Conserved hypothetical protein.	chr01	6257846	6258501	+
183	Os01t0214600-01	Lipase, GDSL domain containing protein.	chr01	6267440	6270770	+	Biological Process: lipid metabolic process (GO:0006629), Molecular Function: hydrolase activity, acting on ester bonds (GO:0016788)	Lipase, GDSL (IPR001087)
184	Os01t0214800-01	Lipase, GDSL domain containing protein.	chr01	6278520	6283559	+	Biological Process: lipid metabolic process (GO:0006629), Molecular Function: hydrolase activity, acting on ester bonds (GO:0016788)	Lipase, GDSL (IPR001087)
185	Os01t0214800-02	Similar to Esterase.	chr01	6278521	6281742	+	Biological Process: lipid metabolic process (GO:0006629), Molecular Function: hydrolase activity, acting on ester bonds (GO:0016788)	Lipase, GDSL (IPR001087)
186	Os01t0214800-03	Similar to Esterase.	chr01	6278611	6283559	+	Biological Process: lipid metabolic process (GO:0006629), Molecular Function: hydrolase activity, acting on ester bonds (GO:0016788)	Lipase, GDSL (IPR001087)
187	Os01t0214901-00	Hypothetical protein.	chr01	6278711	6283235	-
188	Os01t0215000-01	Lipase, GDSL domain containing protein.	chr01	6288365	6292301	+	Biological Process: lipid metabolic process (GO:0006629), Molecular Function: hydrolase activity, acting on ester bonds (GO:0016788)	Lipase, GDSL (IPR001087)
189	Os01t0215100-00	Similar to scpl50 (serine carboxypeptidase-like 50); serine-type carboxypeptidase.	chr01	6296963	6297334	+	Biological Process: proteolysis (GO:0006508), Molecular Function: serine-type carboxypeptidase activity (GO:0004185)	Peptidase S10, serine carboxypeptidase (IPR001563)
190	Os01t0215500-01	Similar to esterase.	chr01	6304802	6306605	+	Biological Process: lipid metabolic process (GO:0006629), Molecular Function: hydrolase activity, acting on ester bonds (GO:0016788)	Lipase, GDSL (IPR001087)
191	Os01t0215700-01	Esterase, SGNH hydrolase-type domain containing protein.	chr01	6319130	6322307	+	Biological Process: lipid metabolic process (GO:0006629), Molecular Function: hydrolase activity, acting on ester bonds (GO:0016788)	Lipase, GDSL (IPR001087), Esterase, SGNH hydrolase-type (IPR013830)
192	Os01t0215700-02	Esterase, SGNH hydrolase-type domain containing protein.	chr01	6319390	6322451	+	Biological Process: lipid metabolic process (GO:0006629), Molecular Function: hydrolase activity, acting on ester bonds (GO:0016788)	Lipase, GDSL (IPR001087), Esterase, SGNH hydrolase-type (IPR013830)
193	Os01t0215725-00	Hypothetical protein.	chr01	6319466	6322051	-
194	Os01t0215750-01	Hypothetical gene.	chr01	6326282	6329098	+
195	Os01t0216000-01	Lipase, GDSL domain containing protein.	chr01	6340836	6344286	+	Biological Process: lipid metabolic process (GO:0006629), Molecular Function: hydrolase activity, acting on ester bonds (GO:0016788)	Lipase, GDSL (IPR001087)
196	Os01t0216150-00	Hypothetical protein.	chr01	6340983	6343950	-
197	Os01t0216300-01	Lipase, GDSL domain containing protein.	chr01	6352582	6358355	+	Biological Process: lipid metabolic process (GO:0006629), Molecular Function: hydrolase activity, acting on ester bonds (GO:0016788)	Lipase, GDSL (IPR001087)
198	Os01t0216350-00	Hypothetical protein.	chr01	6353714	6357017	-
199	Os01t0216400-00	Lipase, GDSL domain containing protein.	chr01	6361526	6363457	+	Biological Process: lipid metabolic process (GO:0006629), Molecular Function: hydrolase activity, acting on ester bonds (GO:0016788)	Lipase, GDSL (IPR001087)
200	Os01t0216500-00	Lipase, GDSL domain containing protein.	chr01	6365063	6367057	+	Biological Process: lipid metabolic process (GO:0006629), Molecular Function: hydrolase activity, acting on ester bonds (GO:0016788)	Lipase, GDSL (IPR001087)
201	Os01t0216600-00	Hypothetical protein.	chr01	6365099	6366237	-
202	Os01t0216900-00	Lipase, GDSL domain containing protein.	chr01	6374207	6381837	+	Biological Process: lipid metabolic process (GO:0006629), Molecular Function: hydrolase activity, acting on ester bonds (GO:0016788)	Lipase, GDSL (IPR001087)
203	Os01t0216951-00	Non-protein coding transcript.	chr01	6377363	6381819	-
204	Os01t0217000-01	Protein of unknown function DUF231, plant domain containing protein.	chr01	6387691	6391467	-		Domain of unknown function DUF231, plant (IPR004253)
205	Os01t0217000-02	Similar to Alpha galactosidase.	chr01	6387860	6390995	-		Domain of unknown function DUF231, plant (IPR004253)
206	Os01t0217050-00	Hypothetical protein.	chr01	6388780	6390920	+
207	Os01t0217100-01	Conserved hypothetical protein.	chr01	6394270	6395665	+
208	Os01t0217400-00	Conserved hypothetical protein.	chr01	6402871	6405410	-
209	Os01t0217500-01	ThiJ/PfpI domain containing protein.	chr01	6412786	6419867	+		ThiJ/PfpI (IPR002818), DJ-1 (IPR006287)
210	Os01t0217800-01	ThiJ/PfpI domain containing protein.	chr01	6432336	6435651	+		ThiJ/PfpI (IPR002818), DJ-1 (IPR006287)
211	Os01t0218032-01	Putative DNA demethylase, Endosperm development	chr01	6444246	6456068	+	Biological Process: DNA repair (GO:0006281), Biological Process: base-excision repair (GO:0006284), Molecular Function: catalytic activity (GO:0003824), Molecular Function: 4 iron, 4 sulfur cluster binding (GO:0051539)	DNA glycosylase (IPR011257), HhH-GPD domain (IPR003265), Helix-turn-helix, base-excision DNA repair, C-terminal (IPR023170), Permuted single zf-CXXC unit (IPR028924), Demeter, RRM-fold domain (IPR028925), Endonuclease III-like, iron-sulphur cluster loop motif (IPR003651)
212	Os01t0218100-01	Helix-loop-helix DNA-binding domain containing protein.	chr01	6462770	6465035	+		Helix-loop-helix DNA-binding (IPR011598)
213	Os01t0218200-00	Thioredoxin domain 2 containing protein.	chr01	6471789	6476664	+	Biological Process: cell redox homeostasis (GO:0045454), Molecular Function: binding (GO:0005488), Molecular Function: protein binding (GO:0005515)	Tetratricopeptide TPR-1 (IPR001440), Tetratricopeptide-like helical (IPR011990), Thioredoxin-like fold (IPR012336), Tetratricopeptide repeat-containing (IPR013026), Tetratricopeptide TPR2 (IPR013105), Thioredoxin domain (IPR013766), Tetratricopeptide repeat (IPR019734)
214	Os01t0218350-00	Hypothetical protein.	chr01	6471818	6476650	-
215	Os01t0218500-01	Similar to ZCN14 protein.	chr01	6494446	6497781	+		Phosphatidylethanolamine-binding, conserved site (IPR001858), Phosphatidylethanolamine-binding protein PEBP (IPR008914)
216	Os01t0218500-02	FLOWERING LOCUS T (FT)-Like homolog, FT-Like1 homologous to Arabidopsis Flowering Locus T gene, Promotion of flowering	chr01	6494516	6499766	+	Biological Process: regulation of flower development (GO:0009909), Biological Process: photoperiodism, flowering (GO:0048573), Molecular Function: phosphatidylethanolamine binding (GO:0008429)	Phosphatidylethanolamine-binding protein (IPR008914), Protein FLOWERING LOCUS T (IPR031095), Phosphatidylethanolamine-binding, conserved site (IPR001858)
217	Os01t0218500-03	Similar to ZCN14 protein.	chr01	6494583	6495668	+		Phosphatidylethanolamine-binding, conserved site (IPR001858), Phosphatidylethanolamine-binding protein PEBP (IPR008914)
218	Os01t0218500-04	Non-protein coding transcript.	chr01	6495257	6497781	+
219	Os01t0218700-01	ABC transporter integral membrane type 1 domain containing protein.	chr01	6500709	6507086	-	Biological Process: transport (GO:0006810), Biological Process: transmembrane transport (GO:0055085), Cellular Component: membrane (GO:0016020), Cellular Component: integral to membrane (GO:0016021), Molecular Function: nucleotide binding (GO:0000166), Molecular Function: ATP binding (GO:0005524), Molecular Function: ATPase activity (GO:0016887), Molecular Function: nucleoside-triphosphatase acti…	ABC transporter-like (IPR003439), ATPase, AAA+ type, core (IPR003593), ABC transporter, N-terminal (IPR010509), ABC transporter, transmembrane domain, type 1 (IPR011527), ABC transporter, conserved site (IPR017871), ABC transporter, integral membrane type 1 (IPR017940)
220	Os01t0218700-02	Similar to peroxisomal membrane ABC transporter family, PMP family.	chr01	6500709	6502533	-	Molecular Function: ATP binding (GO:0005524), Molecular Function: ATPase activity (GO:0016887)	ABC transporter-like (IPR003439)
221	Os01t0218800-02	Similar to SET domain protein.	chr01	6507356	6513979	-	Molecular Function: protein binding (GO:0005515), Molecular Function: zinc ion binding (GO:0008270)	PWWP (IPR000313), SET domain (IPR001214), Zinc finger, PHD-type (IPR001965), Post-SET domain (IPR003616), Zinc finger, FYVE/PHD-type (IPR011011), Zinc finger, RING/FYVE/PHD-type (IPR013083), Zinc finger, PHD-type, conserved site (IPR019786), Zinc finger, PHD-finger (IPR019787)
222	Os01t0218800-01	Similar to Trithorax 5 (Fragment).	chr01	6507368	6514640	-	Molecular Function: protein binding (GO:0005515), Molecular Function: zinc ion binding (GO:0008270)	PWWP (IPR000313), SET domain (IPR001214), Zinc finger, PHD-type (IPR001965), Post-SET domain (IPR003616), Zinc finger, FYVE/PHD-type (IPR011011), Zinc finger, RING/FYVE/PHD-type (IPR013083), Zinc finger, PHD-type, conserved site (IPR019786), Zinc finger, PHD-finger (IPR019787)
223	Os01t0218900-01	Zinc finger, PHD-type domain containing protein.	chr01	6518152	6521026	-	Molecular Function: protein binding (GO:0005515), Molecular Function: zinc ion binding (GO:0008270)	PWWP (IPR000313), Zinc finger, PHD-type (IPR001965), Zinc finger, FYVE/PHD-type (IPR011011), Zinc finger, RING/FYVE/PHD-type (IPR013083), Zinc finger, PHD-finger (IPR019787)
224	Os01t0219000-00	Conserved hypothetical protein.	chr01	6523644	6524609	+
225	Os01t0219100-01	SFT2-like family protein.	chr01	6525486	6528178	+	Biological Process: transport (GO:0006810), Biological Process: vesicle-mediated transport (GO:0016192), Cellular Component: integral to membrane (GO:0016021)	Vesicle transport protein, Got1/SFT2-like (IPR007305), Vesicle transport protein, SFT2-like (IPR011691)
226	Os01t0219200-01	F-box protein, Mediation of bouquet formation, Promotion of homolog pairing, synapsis, and crossover formation in meiosis	chr01	6528797	6531845	+	Molecular Function: protein binding (GO:0005515)	F-box-like domain superfamily (IPR036047)
227	Os01t0219300-01	Conserved hypothetical protein.	chr01	6534612	6535829	+
228	Os01t0219500-01	Plant lipid transfer protein/Par allergen family protein.	chr01	6541008	6543076	+	Biological Process: lipid transport (GO:0006869), Molecular Function: lipid binding (GO:0008289)	Plant lipid transfer protein/Par allergen (IPR000528), Plant lipid transfer protein/seed storage/trypsin-alpha amylase inhibitor (IPR003612), Plant lipid transfer protein/hydrophobic protein, helical domain (IPR013770), Bifunctional inhibitor/plant lipid transfer protein/seed storage (IPR016140)
229	Os01t0219600-00	Similar to Endo-beta-1,4-glucanase precursor (EC 3.2.1.4).	chr01	6541971	6544461	-	Biological Process: carbohydrate metabolic process (GO:0005975), Cellular Component: extracellular region (GO:0005576), Molecular Function: catalytic activity (GO:0003824), Molecular Function: hydrolase activity, hydrolyzing O-glycosyl compounds (GO:0004553), Molecular Function: carbohydrate binding (GO:0030246)	Glycoside hydrolase, family 9 (IPR001701), Six-hairpin glycosidase-like (IPR008928), Six-hairpin glycosidase (IPR012341), Glycoside hydrolase, family 9, active site (IPR018221), Carbohydrate binding domain CBM49 (IPR019028)
230	Os01t0220100-01	Similar to Cellulase.	chr01	6564697	6568140	-	Biological Process: carbohydrate metabolic process (GO:0005975), Cellular Component: extracellular region (GO:0005576), Molecular Function: catalytic activity (GO:0003824), Molecular Function: hydrolase activity, hydrolyzing O-glycosyl compounds (GO:0004553), Molecular Function: carbohydrate binding (GO:0030246)	Glycoside hydrolase, family 9 (IPR001701), Six-hairpin glycosidase-like (IPR008928), Six-hairpin glycosidase (IPR012341), Glycoside hydrolase, family 9, active site (IPR018221), Carbohydrate binding domain CBM49 (IPR019028)
231	Os01t0220150-00	Hypothetical protein.	chr01	6565814	6568033	+
232	Os01t0220200-01	Similar to Uncharacterized plant-specific domain TIGR01589 family protein.	chr01	6575127	6577148	-		Conserved hypothetical protein CHP01589, plant (IPR006476)
233	Os01t0220300-01	Translation elongation factor EF1B/ribosomal protein S6 domain containing protein.	chr01	6583687	6587107	+	Biological Process: translation (GO:0006412), Cellular Component: ribosome (GO:0005840), Molecular Function: structural constituent of ribosome (GO:0003735), Molecular Function: rRNA binding (GO:0019843)	Ribosomal protein S6 (IPR000529), Translation elongation factor EF1B/ribosomal protein S6 (IPR014717)
234	Os01t0220400-01	Hypothetical protein.	chr01	6587146	6587940	-
235	Os01t0220500-00	Similar to predicted protein.	chr01	6590983	6592142	-
236	Os01t0220700-00	Similar to predicted protein.	chr01	6612386	6613717	-	Cellular Component: integral to membrane (GO:0016021)	RAG1-activating protein-1-related (IPR004316)
237	Os01t0220801-00	Hypothetical protein.	chr01	6617011	6618001	+
238	Os01t0220900-01	Hypothetical conserved gene.	chr01	6617173	6621786	-
239	Os01t0221000-00	Hypothetical protein.	chr01	6625041	6625522	+
240	Os01t0221100-01	Jasmonyl-L-isoleucine synthase, Wound response, Jasmonic acid signalling	chr01	6626040	6630462	-		GH3 family (IPR004993)
241	Os01t0221100-02	GH3 auxin-responsive promoter family protein.	chr01	6627308	6630462	-		GH3 auxin-responsive promoter (IPR004993)
242	Os01t0221300-01	Conserved hypothetical protein.	chr01	6642665	6645159	-
243	Os01t0221400-00	Conserved hypothetical protein.	chr01	6649853	6650092	+
244	Os01t0221500-01	Protein of unknown function DUF2358 domain containing protein.	chr01	6653148	6655290	+
245	Os01t0221600-01	Aluminum-activated malate transporter, Malate-permeable anion channel, Facilitation of malate efflux from cells	chr01	6659237	6662320	+	Biological Process: malate transport (GO:0015743)	Aluminum-activated malate transporter (IPR020966)
246	Os01t0221700-00	Similar to GDT1-like protein 1, chloroplastic.	chr01	6663533	6666725	+	Cellular Component: membrane (GO:0016020)	Uncharacterised protein family UPF0016 (IPR001727)
247	Os01t0221800-01	Non-protein coding transcript.	chr01	6667187	6667623	+
248	Os01t0221900-01	Similar to peptidase C45, acyl-coenzyme A/6-aminopenicillanic acid acyl-transferase.	chr01	6667724	6670479	-
249	Os01t0222001-01	Hypothetical conserved gene.	chr01	6676522	6678026	-
250	Os01t0222300-01	Conserved hypothetical protein.	chr01	6694030	6696795	-
251	Os01t0222500-01	Similar to Vacuolar ATP synthase subunit E (EC 3.6.3.14) (V-ATPase E subunit) (Vacuolar proton pump E subunit).	chr01	6699636	6703371	-	Biological Process: ATP hydrolysis coupled proton transport (GO:0015991), Cellular Component: proton-transporting two-sector ATPase complex, catalytic domain (GO:0033178), Molecular Function: proton-transporting ATPase activity, rotational mechanism (GO:0046961)	ATPase, V1/A1 complex, subunit E (IPR002842)
252	Os01t0222600-01	Conserved hypothetical protein.	chr01	6704187	6704746	-
253	Os01t0222700-01	Protein of unknown function DUF659 domain containing protein.	chr01	6705859	6710552	-	Molecular Function: nucleic acid binding (GO:0003676), Molecular Function: DNA binding (GO:0003677), Molecular Function: protein dimerization activity (GO:0046983)	Zinc finger, BED-type predicted (IPR003656), Domain of unknown function DUF659 (IPR007021), HAT dimerisation (IPR008906), Ribonuclease H-like (IPR012337)
254	Os01t0222700-02	Protein of unknown function DUF659 domain containing protein.	chr01	6705882	6710163	-	Molecular Function: nucleic acid binding (GO:0003676), Molecular Function: DNA binding (GO:0003677), Molecular Function: protein dimerization activity (GO:0046983)	Zinc finger, BED-type predicted (IPR003656), Domain of unknown function DUF659 (IPR007021), HAT dimerisation (IPR008906), Ribonuclease H-like (IPR012337)
255	Os01t0222800-00	Similar to OSIGBa0145C12.7 protein.	chr01	6713909	6714986	+
256	Os01t0222900-01	Curculin-like (mannose-binding) lectin domain containing protein.	chr01	6715521	6716305	+	Molecular Function: sugar binding (GO:0005529)	Bulb-type lectin domain (IPR001480)
257	Os01t0223000-01	Lipase, GDSL domain containing protein.	chr01	6718349	6719944	-	Biological Process: lipid metabolic process (GO:0006629), Molecular Function: hydrolase activity, acting on ester bonds (GO:0016788)	Lipase, GDSL (IPR001087)
258	Os01t0223200-01	Lipase, GDSL domain containing protein.	chr01	6724946	6728538	-	Biological Process: lipid metabolic process (GO:0006629), Molecular Function: hydrolase activity (GO:0016787), Molecular Function: hydrolase activity, acting on ester bonds (GO:0016788)	Lipase, GDSL (IPR001087), Esterase, SGNH hydrolase-type, subgroup (IPR013831)
259	Os01t0223300-01	Protein of unknown function DUF1677, Oryza sativa domain containing protein.	chr01	6732152	6735482	+		Protein of unknown function DUF1677, Oryza sativa (IPR012871)
260	Os01t0223500-00	Similar to Esterase.	chr01	6765268	6765888	-
261	Os01t0223600-01	Similar to Pto kinase interactor 1-like protein.	chr01	6766511	6769519	-	Biological Process: protein phosphorylation (GO:0006468), Molecular Function: protein kinase activity (GO:0004672), Molecular Function: ATP binding (GO:0005524), Molecular Function: transferase activity, transferring phosphorus-containing groups (GO:0016772)	Protein kinase, catalytic domain (IPR000719), Serine-threonine/tyrosine-protein kinase (IPR001245), Protein kinase-like domain (IPR011009), Protein kinase, ATP binding site (IPR017441)
262	Os01t0223700-01	Bulb-type lectin domain domain containing protein.	chr01	6774202	6776856	-	Molecular Function: sugar binding (GO:0005529)	Bulb-type lectin domain (IPR001480)
263	Os01t0223800-00	Hypothetical conserved gene.	chr01	6781919	6786415	-	Biological Process: protein phosphorylation (GO:0006468), Biological Process: recognition of pollen (GO:0048544), Molecular Function: protein kinase activity (GO:0004672), Molecular Function: protein serine/threonine kinase activity (GO:0004674), Molecular Function: protein tyrosine kinase activity (GO:0004713), Molecular Function: ATP binding (GO:0005524), Molecular Function: sugar binding (GO:0…	Protein kinase, catalytic domain (IPR000719), S-locus glycoprotein (IPR000858), Bulb-type lectin domain (IPR001480), Serine/threonine-protein kinase, catalytic domain (IPR002290), Apple-like (IPR003609), Serine/threonine-protein kinase, active site (IPR008271), Protein kinase-like domain (IPR011009), PAN-2 domain (IPR013227), Protein kinase, ATP binding site (IPR017441), Serine/threonine-protein …
264	Os01t0223900-01	Serine/threonine protein kinase-related domain containing protein.	chr01	6787094	6789730	+	Biological Process: protein phosphorylation (GO:0006468), Biological Process: recognition of pollen (GO:0048544), Molecular Function: protein kinase activity (GO:0004672), Molecular Function: protein serine/threonine kinase activity (GO:0004674), Molecular Function: ATP binding (GO:0005524), Molecular Function: sugar binding (GO:0005529), Molecular Function: transferase activity, transferring pho…	Protein kinase, catalytic domain (IPR000719), S-locus glycoprotein (IPR000858), Bulb-type lectin domain (IPR001480), Apple-like (IPR003609), Serine/threonine-protein kinase, active site (IPR008271), Protein kinase-like domain (IPR011009), PAN-2 domain (IPR013227), Protein kinase, ATP binding site (IPR017441), Serine/threonine-protein kinase-like domain (IPR017442), S-receptor-like serine/threonin…
265	Os01t0224000-00	Serine/threonine protein kinase-related domain containing protein.	chr01	6790903	6793320	-	Biological Process: protein phosphorylation (GO:0006468), Biological Process: recognition of pollen (GO:0048544), Molecular Function: protein kinase activity (GO:0004672), Molecular Function: protein serine/threonine kinase activity (GO:0004674), Molecular Function: ATP binding (GO:0005524), Molecular Function: sugar binding (GO:0005529), Molecular Function: transferase activity, transferring pho…	Protein kinase, catalytic domain (IPR000719), S-locus glycoprotein (IPR000858), Bulb-type lectin domain (IPR001480), Apple-like (IPR003609), Serine/threonine-protein kinase, active site (IPR008271), Protein kinase-like domain (IPR011009), PAN-2 domain (IPR013227), Concanavalin A-like lectin/glucanase, subgroup (IPR013320), Protein kinase, ATP binding site (IPR017441), Serine/threonine-protein kin…
266	Os01t0224100-01	Similar to DNA binding protein-like protein.	chr01	6813719	6815534	+	Biological Process: regulation of transcription, DNA-dependent (GO:0006355), Molecular Function: DNA binding (GO:0003677), Molecular Function: sequence-specific DNA binding transcription factor activity (GO:0003700)	Pathogenesis-related transcriptional factor/ERF, DNA-binding (IPR001471), DNA-binding, integrase-type (IPR016177)
267	Os01t0224100-02	Similar to DNA binding protein-like protein.	chr01	6813953	6815512	+	Biological Process: regulation of transcription, DNA-dependent (GO:0006355), Molecular Function: DNA binding (GO:0003677), Molecular Function: sequence-specific DNA binding transcription factor activity (GO:0003700)	Pathogenesis-related transcriptional factor/ERF, DNA-binding (IPR001471), DNA-binding, integrase-type (IPR016177)
268	Os01t0224166-00	Hypothetical gene.	chr01	6828512	6829334	+
269	Os01t0224200-00	Hypothetical conserved gene.	chr01	6830317	6832770	-
270	Os01t0224300-01	CHCH domain containing protein.	chr01	6833058	6835244	+		MTCP1 (IPR009069)
271	Os01t0224400-01	Similar to Mitochondrial carrier protein.	chr01	6838234	6841165	+		Mitochondrial substrate/solute carrier (IPR018108), Mitochondrial carrier domain (IPR023395)
272	Os01t0224500-01	Conserved hypothetical protein.	chr01	6841600	6843524	-
273	Os01t0224700-01	Flavin monooxygenase-like enzyme, Auxin biosynthesis	chr01	6857345	6860952	+	Biological Process: oxidation-reduction process (GO:0055114), Molecular Function: flavin-containing monooxygenase activity (GO:0004499), Molecular Function: flavin adenine dinucleotide binding (GO:0050660), Molecular Function: NADP binding (GO:0050661)	FAD-dependent pyridine nucleotide-disulphide oxidoreductase (IPR013027), Flavin monooxygenase-like (IPR020946)
274	Os01t0225000-00	Mitochondrial carrier protein domain containing protein.	chr01	6879860	6881980	-	Biological Process: transport (GO:0006810), Biological Process: transmembrane transport (GO:0055085), Cellular Component: mitochondrial inner membrane (GO:0005743), Molecular Function: binding (GO:0005488)	Mitochondrial carrier protein (IPR002067), Mitochondrial substrate/solute carrier (IPR018108), Mitochondrial carrier domain (IPR023395)
275	Os01t0225100-01	Conserved hypothetical protein.	chr01	6889444	6896387	+
276	Os01t0225200-01	Similar to predicted protein.	chr01	6897571	6904232	+	Cellular Component: intracellular (GO:0005622), Molecular Function: GTP binding (GO:0005525)	GTP-binding domain, HSR1-related (IPR002917), GTP1/OBG (IPR006073), GTP-binding, EngA (IPR016484)
277	Os01t0225300-01	Conserved hypothetical protein.	chr01	6906353	6909594	+
278	Os01t0225400-01	Pyruvate/Phosphoenolpyruvate kinase, catalytic core domain containing protein.	chr01	6909800	6910700	-	Biological Process: pantothenate biosynthetic process (GO:0015940), Molecular Function: catalytic activity (GO:0003824), Molecular Function: 3-methyl-2-oxobutanoate hydroxymethyltransferase activity (GO:0003864)	Ketopantoate hydroxymethyltransferase (IPR003700), Pyruvate/Phosphoenolpyruvate kinase (IPR015813)
279	Os01t0225500-00	Similar to 3-methyl-2-oxobutanoate hydroxymethyltransferase.	chr01	6912812	6915127	-	Biological Process: pantothenate biosynthetic process (GO:0015940), Molecular Function: catalytic activity (GO:0003824), Molecular Function: 3-methyl-2-oxobutanoate hydroxymethyltransferase activity (GO:0003864)	Ketopantoate hydroxymethyltransferase (IPR003700), Pyruvate/Phosphoenolpyruvate kinase (IPR015813)
280	Os01t0225600-00	Similar to Dehydrin.	chr01	6922127	6922762	-	Biological Process: response to desiccation (GO:0009269)	Late embryogenesis abundant protein, LEA-14 (IPR004864), Immunoglobulin-like fold (IPR013783), Water stress and hypersensitive response domain (IPR013990)
281	Os01t0225550-01	Hypothetical gene.	chr01	6922190	6923336	+
282	Os01t0225700-01	Hypothetical gene.	chr01	6925469	6925910	+
283	Os01t0226200-00	Conserved hypothetical protein.	chr01	6957350	6958652	-
284	Os01t0226250-00	Non-protein coding transcript.	chr01	6967909	6969059	-
285	Os01t0226300-01	Reticulon family protein.	chr01	6968951	6970078	+	Cellular Component: endoplasmic reticulum (GO:0005783)	Reticulon (IPR003388)
286	Os01t0226400-01	ATPase, AAA-type, core domain containing protein.	chr01	6970912	6976706	-	Molecular Function: nucleotide binding (GO:0000166), Molecular Function: ATP binding (GO:0005524), Molecular Function: nucleoside-triphosphatase activity (GO:0017111)	ATPase, AAA+ type, core (IPR003593), ATPase, AAA-type, core (IPR003959), ATPase, AAA-type, conserved site (IPR003960)
287	Os01t0226450-00	Hypothetical protein.	chr01	6971042	6976599	+
288	Os01t0226500-01	Conserved hypothetical protein.	chr01	6979616	6985720	+
289	Os01t0226500-02	Similar to predicted protein.	chr01	6980199	6985353	+
290	Os01t0226600-01	Similar to C4-dicarboxylate transporter/malic acid transport protein.	chr01	6987901	6994006	+	Biological Process: transmembrane transport (GO:0055085), Cellular Component: integral to membrane (GO:0016021)	C4-dicarboxylate transporter/malic acid transport protein (IPR004695)
291	Os01t0226600-02	Similar to C4-dicarboxylate transporter/malic acid transport protein.	chr01	6989015	6993608	+	Biological Process: transmembrane transport (GO:0055085), Cellular Component: integral to membrane (GO:0016021)	C4-dicarboxylate transporter/malic acid transport protein (IPR004695)
292	Os01t0226666-00	Hypothetical protein.	chr01	7008989	7010250	-
293	Os01t0226700-01	Protein of unknown function DUF623, plant domain containing protein.	chr01	7009033	7010446	+		Domain of unknown function DUF623 (IPR006458)
294	Os01t0227100-01	Chlorophyll b reductase, Leaf senescence	chr01	7024297	7030591	+	Biological Process: metabolic process (GO:0008152), Molecular Function: nucleotide binding (GO:0000166), Molecular Function: oxidoreductase activity (GO:0016491)	Short-chain dehydrogenase/reductase SDR (IPR002198), Glucose/ribitol dehydrogenase (IPR002347), NAD(P)-binding domain (IPR016040)
295	Os01t0227100-02	Similar to oxidoreductase.	chr01	7026322	7030430	+	Biological Process: metabolic process (GO:0008152), Molecular Function: nucleotide binding (GO:0000166), Molecular Function: oxidoreductase activity (GO:0016491)	Short-chain dehydrogenase/reductase SDR (IPR002198), Glucose/ribitol dehydrogenase (IPR002347), NAD(P)-binding domain (IPR016040)
296	Os01t0227200-01	Similar to Somatic embryogenesis receptor kinase-like protein.	chr01	7038103	7042925	+	Biological Process: protein phosphorylation (GO:0006468), Molecular Function: protein kinase activity (GO:0004672), Molecular Function: protein serine/threonine kinase activity (GO:0004674), Molecular Function: ATP binding (GO:0005524), Molecular Function: transferase activity, transferring phosphorus-containing groups (GO:0016772)	Protein kinase, catalytic domain (IPR000719), Serine-threonine/tyrosine-protein kinase (IPR001245), Serine/threonine-protein kinase, active site (IPR008271), Protein kinase-like domain (IPR011009), Protein kinase, ATP binding site (IPR017441)
297	Os01t0227250-00	Hypothetical gene.	chr01	7039880	7042890	-
298	Os01t0227300-01	Similar to RAB7D.	chr01	7044012	7047544	+	Biological Process: GTP catabolic process (GO:0006184), Biological Process: intracellular protein transport (GO:0006886), Biological Process: nucleocytoplasmic transport (GO:0006913), Biological Process: signal transduction (GO:0007165), Biological Process: small GTPase mediated signal transduction (GO:0007264), Biological Process: protein transport (GO:0015031), Cellular Component: intracellular…	Small GTPase superfamily (IPR001806), Ran GTPase (IPR002041), Small GTPase superfamily, Rho type (IPR003578), Small GTPase superfamily, Rab type (IPR003579), Small GTP-binding protein domain (IPR005225), Small GTPase superfamily, Ras type (IPR020849)
299	Os01t0227350-00	Hypothetical protein.	chr01	7048457	7050422	-
300	Os01t0227400-01	Similar to Cytochrome P450 71A1 (EC 1.14.-.-) (CYPLXXIA1) (ARP-2).	chr01	7049941	7050874	+	Biological Process: oxidation-reduction process (GO:0055114), Molecular Function: iron ion binding (GO:0005506), Molecular Function: electron carrier activity (GO:0009055), Molecular Function: oxidoreductase activity, acting on paired donors, with incorporation or reduction of molecular oxygen (GO:0016705), Molecular Function: heme binding (GO:0020037)	Cytochrome P450 (IPR001128), Cytochrome P450, E-class, group I (IPR002401), Cytochrome P450, conserved site (IPR017972)
301	Os01t0227500-01	Cytochrome P450 family protein.	chr01	7053100	7056373	+	Biological Process: oxidation-reduction process (GO:0055114), Molecular Function: iron ion binding (GO:0005506), Molecular Function: electron carrier activity (GO:0009055), Molecular Function: oxidoreductase activity, acting on paired donors, with incorporation or reduction of molecular oxygen (GO:0016705), Molecular Function: heme binding (GO:0020037)	Cytochrome P450 (IPR001128), Cytochrome P450, E-class, group I (IPR002401), Cytochrome P450, conserved site (IPR017972)
302	Os01t0227700-01	Cytochrome P450 family protein.	chr01	7061377	7065249	+	Biological Process: oxidation-reduction process (GO:0055114), Molecular Function: iron ion binding (GO:0005506), Molecular Function: electron carrier activity (GO:0009055), Molecular Function: oxidoreductase activity, acting on paired donors, with incorporation or reduction of molecular oxygen (GO:0016705), Molecular Function: heme binding (GO:0020037)	Cytochrome P450 (IPR001128), Cytochrome P450, E-class, group I (IPR002401), Cytochrome P450, conserved site (IPR017972)
303	Os01t0227800-01	Similar to cDNA, clone: J075083L18, full insert sequence.	chr01	7071481	7073788	+	Biological Process: oxidation-reduction process (GO:0055114), Molecular Function: iron ion binding (GO:0005506), Molecular Function: electron carrier activity (GO:0009055), Molecular Function: oxidoreductase activity, acting on paired donors, with incorporation or reduction of molecular oxygen (GO:0016705), Molecular Function: heme binding (GO:0020037)	Cytochrome P450 (IPR001128), Cytochrome P450, E-class, group I (IPR002401), Cytochrome P450, conserved site (IPR017972)
304	Os01t0228300-01	Mpv17/PMP22 family protein.	chr01	7085873	7089172	-	Cellular Component: integral to membrane (GO:0016021)	Mpv17/PMP22 (IPR007248)
305	Os01t0228400-01	Pentatricopeptide repeat domain containing protein.	chr01	7092034	7095315	+	Molecular Function: binding (GO:0005488)	Pentatricopeptide repeat (IPR002885), Tetratricopeptide-like helical (IPR011990)
306	Os01t0228450-00	Hypothetical protein.	chr01	7092967	7095091	-
307	Os01t0228500-01	Harpin-induced 1 domain containing protein.	chr01	7095864	7097381	-		Late embryogenesis abundant protein, LEA-14 (IPR004864)
308	Os01t0228600-03	Similar to 2-hydroxyacid dehydrogenase (AGR_L_379p).	chr01	7100070	7103144	-	Biological Process: metabolic process (GO:0008152), Biological Process: oxidation-reduction process (GO:0055114), Molecular Function: nucleotide binding (GO:0000166), Molecular Function: oxidoreductase activity, acting on the CH-OH group of donors, NAD or NADP as acceptor (GO:0016616), Molecular Function: cofactor binding (GO:0048037), Molecular Function: NAD binding (GO:0051287)	D-isomer specific 2-hydroxyacid dehydrogenase, catalytic domain (IPR006139), D-isomer specific 2-hydroxyacid dehydrogenase, NAD-binding (IPR006140), NAD(P)-binding domain (IPR016040)
309	Os01t0228600-01	Cytosolic hydroxypyruvate reductase, NADPH-dependent HPR, Photorespiratory metabolism	chr01	7100073	7103266	-	Biological Process: metabolic process (GO:0008152), Biological Process: oxidation-reduction process (GO:0055114), Molecular Function: oxidoreductase activity, acting on the CH-OH group of donors, NAD or NADP as acceptor (GO:0016616), Molecular Function: NAD binding (GO:0051287)	NAD(P)-binding domain (IPR016040), D-isomer specific 2-hydroxyacid dehydrogenase, catalytic domain (IPR006139), D-isomer specific 2-hydroxyacid dehydrogenase, NAD-binding domain (IPR006140)
310	Os01t0228600-02	Cytosolic hydroxypyruvate reductase, NADPH-dependent HPR, Photorespiratory metabolism	chr01	7100984	7103159	-	Biological Process: metabolic process (GO:0008152), Biological Process: oxidation-reduction process (GO:0055114), Molecular Function: oxidoreductase activity, acting on the CH-OH group of donors, NAD or NADP as acceptor (GO:0016616), Molecular Function: NAD binding (GO:0051287)	NAD(P)-binding domain (IPR016040), D-isomer specific 2-hydroxyacid dehydrogenase, catalytic domain (IPR006139), D-isomer specific 2-hydroxyacid dehydrogenase, NAD-binding domain (IPR006140), D-isomer specific 2-hydroxyacid dehydrogenase, NAD-binding domain conserved site 1 (IPR029752)
311	Os01t0228800-01	Conserved hypothetical protein.	chr01	7104701	7109095	-
312	Os01t0228800-02	Similar to cDNA clone:J013042E14, full insert sequence.	chr01	7105504	7106630	-
313	Os01t0228901-01	Hypothetical gene.	chr01	7115785	7124100	-
314	Os01t0229000-00	Similar to Transcription factor myb.	chr01	7121191	7123857	+
315	Os01t0229100-02	Protein-tyrosine phosphatase, active site domain containing protein.	chr01	7125406	7128890	-		Translation initiation factor 3 complex, subunit L (IPR019382)
316	Os01t0229100-01	Similar to Eukaryotic translation initiation factor 3 subunit 6-interacting protein.	chr01	7127505	7128899	-		Translation initiation factor 3 complex, subunit L (IPR019382)
317	Os01t0229200-01	VHS domain containing protein.	chr01	7129236	7137327	+	Biological Process: intracellular protein transport (GO:0006886), Cellular Component: intracellular (GO:0005622)	VHS (IPR002014), GAT (IPR004152), ENTH/VHS (IPR008942), VHS subgroup (IPR018205)
318	Os01t0229250-00	Hypothetical gene.	chr01	7129396	7136089	-
319	Os01t0229200-02	Hypothetical conserved gene.	chr01	7131682	7137170	+	Biological Process: intracellular protein transport (GO:0006886), Cellular Component: intracellular (GO:0005622)	VHS (IPR002014), GAT (IPR004152)
320	Os01t0229200-03	Hypothetical conserved gene.	chr01	7134005	7137308	+
321	Os01t0229200-04	Hypothetical conserved gene.	chr01	7135877	7137195	+
322	Os01t0229300-01	EMBRYONIC FLOWER1 (EMF1)-like protein, Transcriptional regulator, Palea development, Regulation of floral organ identity	chr01	7157780	7164385	+
323	Os01t0229400-02	Small GTP-binding protein, GTPase, Regulation of cell death, Disease resistance, Immune responses	chr01	7164735	7167377	-	Biological Process: GTP catabolic process (GO:0006184), Biological Process: signal transduction (GO:0007165), Biological Process: small GTPase mediated signal transduction (GO:0007264), Biological Process: protein transport (GO:0015031), Molecular Function: GTP binding (GO:0005525), Cellular Component: intracellular (GO:0005622), Cellular Component: membrane (GO:0016020)	Small GTPase superfamily (IPR001806), Small GTPase superfamily, Rho type (IPR003578), Small GTPase superfamily, Ras type (IPR020849), Small GTPase superfamily, Rab type (IPR003579), P-loop containing nucleoside triphosphate hydrolase (IPR027417), Small GTP-binding protein domain (IPR005225)
324	Os01t0229400-01	Similar to Rac-like GTP-binding protein 1.	chr01	7164742	7167419	-	Biological Process: small GTPase mediated signal transduction (GO:0007264), Cellular Component: intracellular (GO:0005622), Molecular Function: GTP binding (GO:0005525)	Small GTPase superfamily (IPR001806), Small GTPase superfamily, Rho type (IPR003578), Small GTP-binding protein domain (IPR005225)
325	Os01t0229500-01	Thioesterase superfamily domain containing protein.	chr01	7173618	7175779	+		Thioesterase superfamily (IPR006683)
326	Os01t0229600-01	Conserved hypothetical protein.	chr01	7176001	7177050	+
327	Os01t0229700-00	WD40 repeat domain containing protein.	chr01	7177355	7182348	-	Biological Process: protein ubiquitination (GO:0016567), Cellular Component: ubiquitin ligase complex (GO:0000151), Molecular Function: catalytic activity (GO:0003824), Molecular Function: ubiquitin-protein ligase activity (GO:0004842), Molecular Function: protein binding (GO:0005515)	WD40 repeat (IPR001680), U box domain (IPR003613), Soluble quinoprotein glucose/sorbosone dehydrogenase (IPR011041), Zinc finger, RING/FYVE/PHD-type (IPR013083), WD40/YVTN repeat-like-containing domain (IPR015943), WD40 repeat 2 (IPR019782)
328	Os01t0229800-00	Similar to Vegetative storage protein PNI288.	chr01	7186356	7186820	-	Biological Process: nucleoside metabolic process (GO:0009116), Molecular Function: catalytic activity (GO:0003824)	Nucleoside phosphorylase domain (IPR000845), Nucleoside phosphorylase (IPR018017)
329	Os01t0229900-01	Similar to Ubiquitin-conjugating enzyme family protein, expressed.	chr01	7197022	7205680	+	Molecular Function: acid-amino acid ligase activity (GO:0016881)	Ubiquitin-conjugating enzyme, E2 (IPR000608), Ubiquitin-conjugating enzyme/RWD-like (IPR016135)
330	Os01t0229900-02	Similar to Shaggy-related protein kinase dzeta (EC 2.7.1.-) (ASK-dzeta).	chr01	7197059	7208459	+	Molecular Function: acid-amino acid ligase activity (GO:0016881)	Ubiquitin-conjugating enzyme, E2 (IPR000608), Ubiquitin-conjugating enzyme/RWD-like (IPR016135)
331	Os01t0229900-03	Hypothetical conserved gene.	chr01	7206865	7209085	+
332	Os01t0230200-01	Basic helix-loop-helix dimerisation region bHLH domain containing protein.	chr01	7216513	7225127	-		Helix-loop-helix DNA-binding (IPR011598)
333	Os01t0230700-01	Hypothetical conserved gene.	chr01	7238851	7243073	+
334	Os01t0230800-01	Conserved hypothetical protein.	chr01	7244982	7246003	-
335	Os01t0231000-01	Similar to Auxin-responsive protein (Aux/IAA) (Fragment).	chr01	7249771	7253688	+	Biological Process: regulation of transcription, DNA-dependent (GO:0006355), Cellular Component: nucleus (GO:0005634), Molecular Function: protein dimerization activity (GO:0046983)	AUX/IAA protein (IPR003311), Aux/IAA-ARF-dimerisation (IPR011525)
336	Os01t0231000-02	Similar to Auxin-responsive protein (Aux/IAA) (Fragment).	chr01	7249821	7254629	+	Biological Process: regulation of transcription, DNA-dependent (GO:0006355), Cellular Component: nucleus (GO:0005634), Molecular Function: protein dimerization activity (GO:0046983)	AUX/IAA protein (IPR003311), Aux/IAA-ARF-dimerisation (IPR011525)
337	Os01t0231000-03	Similar to Auxin-responsive protein (Aux/IAA) (Fragment).	chr01	7249868	7253703	+	Biological Process: regulation of transcription, DNA-dependent (GO:0006355), Cellular Component: nucleus (GO:0005634), Molecular Function: protein dimerization activity (GO:0046983)	AUX/IAA protein (IPR003311), Aux/IAA-ARF-dimerisation (IPR011525)
338	Os01t0231500-01	Similar to Casein kinase I (Fragment).	chr01	7265286	7271209	+	Biological Process: protein phosphorylation (GO:0006468), Molecular Function: protein kinase activity (GO:0004672), Molecular Function: protein serine/threonine kinase activity (GO:0004674), Molecular Function: ATP binding (GO:0005524), Molecular Function: transferase activity, transferring phosphorus-containing groups (GO:0016772)	Protein kinase, catalytic domain (IPR000719), Serine/threonine-protein kinase, active site (IPR008271), Protein kinase-like domain (IPR011009), Protein kinase, ATP binding site (IPR017441), Serine/threonine-protein kinase-like domain (IPR017442)
339	Os01t0231500-02	Similar to casein kinase I isoform delta-like.	chr01	7265324	7273208	+	Biological Process: protein phosphorylation (GO:0006468), Molecular Function: protein kinase activity (GO:0004672), Molecular Function: ATP binding (GO:0005524), Molecular Function: transferase activity, transferring phosphorus-containing groups (GO:0016772)	Protein kinase, catalytic domain (IPR000719), Protein kinase-like domain (IPR011009), Protein kinase, ATP binding site (IPR017441), Serine/threonine-protein kinase-like domain (IPR017442)
340	Os01t0231600-00	Pleckstrin homology-type domain containing protein.	chr01	7277271	7277972	+	Molecular Function: protein binding (GO:0005515)	Pleckstrin homology-type (IPR011993), Pleckstrin-like, plant (IPR013666)
341	Os01t0231700-01	Similar to 60S acidic ribosomal protein P2-B (CaRP2B).	chr01	7278745	7280241	-	Biological Process: translational elongation (GO:0006414), Cellular Component: intracellular (GO:0005622), Cellular Component: ribosome (GO:0005840), Molecular Function: structural constituent of ribosome (GO:0003735)	Ribosomal protein 60S (IPR001813)
342	Os01t0231800-01	Similar to cDNA clone:J033025F17, full insert sequence.	chr01	7282051	7285991	+		Protein kinase A anchor protein, nuclear localisation signal domain (IPR019510)
343	Os01t0231900-01	K Homology, type 1, subgroup domain containing protein.	chr01	7287974	7294209	+	Biological Process: regulation of transcription, DNA-dependent (GO:0006355), Biological Process: RNA metabolic process (GO:0016070), Cellular Component: intracellular (GO:0005622), Cellular Component: cytoplasm (GO:0005737), Molecular Function: RNA binding (GO:0003723), Molecular Function: catalytic activity (GO:0003824)	K Homology (IPR004087), K Homology, type 1 (IPR004088), RNA ligase/cyclic nucleotide phosphodiesterase (IPR009097), Predicted eukaryotic LigT (IPR009210), K Homology, type 1, subgroup (IPR018111), Protein kinase A anchor protein, nuclear localisation signal domain (IPR019510)
344	Os01t0232000-00	Major intrinsic protein family protein.	chr01	7297781	7298619	+	Biological Process: transport (GO:0006810), Biological Process: water transport (GO:0006833), Biological Process: transmembrane transport (GO:0055085), Cellular Component: membrane (GO:0016020), Cellular Component: integral to membrane (GO:0016021), Molecular Function: transporter activity (GO:0005215)	Major intrinsic protein (IPR000425), Aquaporin (IPR012269), Major intrinsic protein, conserved site (IPR022357), Aquaporin-like (IPR023271)
345	Os01t0231950-00	Hypothetical gene.	chr01	7297999	7298608	-
346	Os01t0232100-01	Similar to Tonoplast membrane integral protein ZmTIP4-3.	chr01	7302563	7303771	+	Biological Process: transport (GO:0006810), Cellular Component: membrane (GO:0016020), Molecular Function: transporter activity (GO:0005215)	Major intrinsic protein (IPR000425), Major intrinsic protein, conserved site (IPR022357), Aquaporin-like (IPR023271)
347	Os01t0232200-00	WD40 repeat domain containing protein.	chr01	7307881	7309458	-	Molecular Function: protein binding (GO:0005515)	WD40 repeat (IPR001680), WD40 repeat-like-containing domain (IPR011046), WD40/YVTN repeat-like-containing domain (IPR015943), WD40-repeat-containing domain (IPR017986), WD40 repeat, subgroup (IPR019781), WD40 repeat 2 (IPR019782), G-protein beta WD-40 repeat (IPR020472)
348	Os01t0232300-01	Similar to TRZ3 (TRNASE Z 3); 3'-tRNA processing endoribonuclease/ catalytic.	chr01	7325060	7332216	+
349	Os01t0232400-01	Similar to VHS1 protein (Fragment).	chr01	7333827	7339181	+	Biological Process: intracellular protein transport (GO:0006886)	Epsin domain, N-terminal (IPR001026), VHS (IPR002014), ENTH/VHS (IPR008942)
350	Os01t0232400-02	Similar to VHS1 protein (Fragment).	chr01	7333897	7339244	+	Biological Process: intracellular protein transport (GO:0006886)	Epsin domain, N-terminal (IPR001026), VHS (IPR002014), ENTH/VHS (IPR008942)
351	Os01t0232450-01	Conserved hypothetical protein.	chr01	7335045	7336010	-
352	Os01t0232500-01	Ubiquitin-conjugating enzyme/RWD-like domain containing protein.	chr01	7340717	7345302	+	Molecular Function: acid-amino acid ligase activity (GO:0016881)	Ubiquitin-conjugating enzyme, E2 (IPR000608), Ubiquitin-conjugating enzyme/RWD-like (IPR016135)
353	Os01t0232500-02	Similar to PFU3/UBC26 (UBIQUITIN-CONJUGATING ENZYME 26); ubiquitin-protein ligase.	chr01	7343761	7345299	+	Molecular Function: acid-amino acid ligase activity (GO:0016881)	Ubiquitin-conjugating enzyme, E2 (IPR000608), Ubiquitin-conjugating enzyme/RWD-like (IPR016135)
354	Os01t0232550-00	Hypothetical conserved gene.	chr01	7344009	7345200	-
355	Os01t0232700-01	Similar to Histidinol dehydrogenase, chloroplast precursor (EC 1.1.1.23) (HDH). Splice isoform 2.	chr01	7348585	7352104	+	Biological Process: histidine biosynthetic process (GO:0000105), Biological Process: metabolic process (GO:0008152), Biological Process: oxidation-reduction process (GO:0055114), Molecular Function: histidinol dehydrogenase activity (GO:0004399), Molecular Function: zinc ion binding (GO:0008270), Molecular Function: oxidoreductase activity (GO:0016491), Molecular Function: NAD binding (GO:0051287)	Histidinol dehydrogenase, conserved site (IPR001692), Histidinol dehydrogenase (IPR012131), Aldehyde/histidinol dehydrogenase (IPR016161)
356	Os01t0232700-02	Similar to Histidinol dehydrogenase.	chr01	7350206	7352096	+	Biological Process: histidine biosynthetic process (GO:0000105), Biological Process: metabolic process (GO:0008152), Biological Process: oxidation-reduction process (GO:0055114), Molecular Function: histidinol dehydrogenase activity (GO:0004399), Molecular Function: zinc ion binding (GO:0008270), Molecular Function: oxidoreductase activity (GO:0016491), Molecular Function: NAD binding (GO:0051287)	Histidinol dehydrogenase, conserved site (IPR001692), Histidinol dehydrogenase (IPR012131), Aldehyde/histidinol dehydrogenase (IPR016161)
357	Os01t0232800-01	Similar to KOB1.	chr01	7352223	7357332	-
358	Os01t0233000-01	DREPP plasma membrane polypeptide family protein.	chr01	7363663	7366111	-		DREPP plasma membrane polypeptide (IPR008469)
359	Os01t0233100-00	Similar to Cyclin-A1-2.	chr01	7370362	7381112	-	Biological Process: regulation of cyclin-dependent protein kinase activity (GO:0000079), Biological Process: regulation of cell cycle (GO:0051726), Cellular Component: nucleus (GO:0005634), Molecular Function: protein kinase binding (GO:0019901)	Cyclin, C-terminal (IPR004367), Cyclin, N-terminal (IPR006671), Cyclin-like (IPR013763), Cyclin A/B/D/E (IPR014400)
360	Os01t0233400-00	Histone H4 acetyltransferase, NuA4 complex, Eaf6 domain containing protein.	chr01	7385705	7388444	+		Histone H4 acetyltransferase, NuA4 complex, Eaf6 (IPR015418)
361	Os01t0233500-01	Cyclin.	chr01	7389373	7393708	-	Biological Process: regulation of cyclin-dependent protein kinase activity (GO:0000079), Biological Process: regulation of cell cycle (GO:0051726), Cellular Component: nucleus (GO:0005634), Molecular Function: protein kinase binding (GO:0019901)	Cyclin, C-terminal (IPR004367), Cyclin, N-terminal (IPR006671), Cyclin-like (IPR013763), Cyclin A/B/D/E (IPR014400)
362	Os01t0233800-01	Similar to Viroid symptom modulation protein.	chr01	7400509	7404310	+	Biological Process: protein phosphorylation (GO:0006468), Molecular Function: protein kinase activity (GO:0004672), Molecular Function: protein serine/threonine kinase activity (GO:0004674), Molecular Function: ATP binding (GO:0005524), Molecular Function: transferase activity, transferring phosphorus-containing groups (GO:0016772)	Protein kinase, catalytic domain (IPR000719), Serine/threonine-protein kinase, catalytic domain (IPR002290), Serine/threonine-protein kinase, active site (IPR008271), Protein kinase-like domain (IPR011009), Serine/threonine-protein kinase-like domain (IPR017442)
363	Os01t0233850-00	Hypothetical gene.	chr01	7403181	7404029	-
364	Os01t0233900-01	Similar to cDNA clone:J013003E06, full insert sequence.	chr01	7404911	7409638	-	Molecular Function: acid-amino acid ligase activity (GO:0016881)	Ubiquitin-conjugating enzyme, E2 (IPR000608), Ubiquitin-conjugating enzyme/RWD-like (IPR016135)
365	Os01t0234001-01	Hypothetical conserved gene.	chr01	7414867	7415353	-
366	Os01t0234100-01	Transcriptional factor B3 family protein.	chr01	7417303	7422388	+	Biological Process: regulation of transcription, DNA-dependent (GO:0006355), Molecular Function: DNA binding (GO:0003677)	Transcriptional factor B3 (IPR003340), DNA-binding pseudobarrel domain (IPR015300), AT hook, DNA-binding motif (IPR017956)
367	Os01t0234200-00	Similar to DNA topoisomerase 2.	chr01	7424284	7427642	-	Biological Process: DNA topological change (GO:0006265), Cellular Component: chromosome (GO:0005694), Molecular Function: DNA binding (GO:0003677), Molecular Function: DNA topoisomerase (ATP-hydrolyzing) activity (GO:0003918), Molecular Function: ATP binding (GO:0005524)	DNA topoisomerase, type IIA, subunit B/N-terminal (IPR001241), ATPase-like, ATP-binding domain (IPR003594), DNA topoisomerase, type IIA, subunit B, domain 2 (IPR013506), Ribosomal protein S5 domain 2-type fold, subgroup (IPR014721), Ribosomal protein S5 domain 2-type fold (IPR020568)
368	Os01t0234300-00	Similar to Pectinesterase.	chr01	7429384	7430544	+	Biological Process: cell wall modification (GO:0042545), Cellular Component: cell wall (GO:0005618), Molecular Function: enzyme inhibitor activity (GO:0004857), Molecular Function: pectinesterase activity (GO:0030599)	Pectinesterase, catalytic (IPR000070), Pectinesterase inhibitor (IPR006501), Pectin lyase fold/virulence factor (IPR011050), Pectin lyase fold (IPR012334)
369	Os01t0234433-00	Hypothetical protein.	chr01	7430381	7431332	-
370	Os01t0234499-00	Similar to Pectinesterase.	chr01	7430568	7431335	+	Biological Process: cell wall modification (GO:0042545), Cellular Component: cell wall (GO:0005618), Molecular Function: pectinesterase activity (GO:0030599)	Pectinesterase, catalytic (IPR000070), Pectin lyase fold/virulence factor (IPR011050), Pectin lyase fold (IPR012334), Pectinesterase, active site (IPR018040)
371	Os01t0234566-00	Non-protein coding transcript.	chr01	7434983	7435055	+
372	Os01t0234700-01	Harpin-induced 1 domain containing protein.	chr01	7437869	7438888	+
373	Os01t0234800-02	Non-protein coding transcript.	chr01	7438862	7439430	-
374	Os01t0234800-01	Similar to 25.3 kDa vesicle transport protein.	chr01	7439093	7443214	-	Biological Process: transport (GO:0006810), Biological Process: vesicle-mediated transport (GO:0016192), Cellular Component: integral to membrane (GO:0016021)	Longin (IPR010908), Longin-like (IPR011012)
375	Os01t0234850-01	Hypothetical conserved gene.	chr01	7443724	7447193	-	Molecular Function: protein binding (GO:0005515), Molecular Function: phosphotransferase activity, alcohol group as acceptor (GO:0016773)	Phosphatidylinositol 3-/4-kinase, catalytic (IPR000403), Ubiquitin (IPR000626), Ubiquitin supergroup (IPR019955)
376	Os01t0234900-01	Similar to Ubiquitin ligase SINAT5 (EC 6.3.2.-) (Seven in absentia homolog 5). Splice isoform 2.	chr01	7450936	7453683	-	Biological Process: ubiquitin-dependent protein catabolic process (GO:0006511), Biological Process: multicellular organismal development (GO:0007275), Biological Process: protein ubiquitination (GO:0016567), Cellular Component: nucleus (GO:0005634), Molecular Function: ubiquitin-protein ligase activity (GO:0004842), Molecular Function: protein binding (GO:0005515), Molecular Function: zinc ion bi…	Zinc finger, RING-type (IPR001841), Seven-in-absentia protein, sina (IPR004162), TRAF-like (IPR008974), Zinc finger, SIAH-type (IPR013010), Zinc finger, RING/FYVE/PHD-type (IPR013083), TRAF-type (IPR013322), Seven In Absentia Homolog-type (IPR013323), Seven-in-absentia protein, TRAF-like domain (IPR018121)
377	Os01t0235100-01	Similar to predicted protein.	chr01	7457835	7459834	+
378	Os01t0235200-02	Conserved hypothetical protein.	chr01	7460350	7465499	-
379	Os01t0235200-01	Conserved hypothetical protein.	chr01	7460616	7465533	-
380	Os01t0235300-01	SOUL haem-binding protein domain containing protein.	chr01	7470710	7472729	+		SOUL haem-binding protein (IPR006917), Regulatory factor, effector, bacterial (IPR011256)
381	Os01t0235300-02	SOUL haem-binding protein domain containing protein.	chr01	7470737	7472727	+		SOUL haem-binding protein (IPR006917), Regulatory factor, effector, bacterial (IPR011256)
382	Os01t0235325-00	Hypothetical protein.	chr01	7470743	7471026	-
383	Os01t0235350-00	Conserved hypothetical protein.	chr01	7473271	7476621	-
384	Os01t0235400-02	Similar to Importin-alpha re-exporter (Cellular apoptosis susceptibility protein homolog).	chr01	7477678	7481366	-	Biological Process: intracellular protein transport (GO:0006886), Molecular Function: binding (GO:0005488), Molecular Function: protein binding (GO:0005515)	CAS/CSE, C-terminal (IPR005043), Armadillo-like helical (IPR011989), Exportin/Importin, Cse1-like (IPR013713), Armadillo-type fold (IPR016024)
385	Os01t0235400-01	Similar to predicted protein.	chr01	7481061	7482814	-	Biological Process: intracellular protein transport (GO:0006886), Molecular Function: binding (GO:0005488), Molecular Function: protein transporter activity (GO:0008565)	Importin-beta, N-terminal (IPR001494), Armadillo-like helical (IPR011989), Exportin/Importin, Cse1-like (IPR013713), Armadillo-type fold (IPR016024)
386	Os01t0235500-01	Conserved hypothetical protein.	chr01	7484910	7485725	+
387	Os01t0235632-00	Hypothetical protein.	chr01	7495062	7498355	+
388	Os01t0235700-01	Similar to BHLH transcription factor (Fragment).	chr01	7495121	7498347	-		Helix-loop-helix DNA-binding (IPR011598)
389	Os01t0235700-02	Similar to BHLH transcription factor (Fragment).	chr01	7495121	7498178	-		Helix-loop-helix DNA-binding (IPR011598)
390	Os01t0235800-01	K Homology domain containing protein.	chr01	7507583	7511672	+	Molecular Function: RNA binding (GO:0003723)	K Homology (IPR004087), K Homology, type 1 (IPR004088), K Homology, type 1, subgroup (IPR018111)
391	Os01t0235850-00	Hypothetical protein.	chr01	7517312	7518483	-
392	Os01t0235900-00	Thioredoxin fold domain containing protein.	chr01	7517314	7518489	+	Biological Process: cell redox homeostasis (GO:0045454), Molecular Function: electron carrier activity (GO:0009055), Molecular Function: protein disulfide oxidoreductase activity (GO:0015035)	Glutaredoxin (IPR002109), Thioredoxin-like fold (IPR012336)
393	Os01t0236000-01	Conserved hypothetical protein.	chr01	7519617	7524433	+
394	Os01t0236300-01	Similar to Auxin response factor 18.	chr01	7547017	7551842	+	Biological Process: regulation of transcription, DNA-dependent (GO:0006355), Biological Process: response to hormone stimulus (GO:0009725), Cellular Component: nucleus (GO:0005634), Molecular Function: DNA binding (GO:0003677), Molecular Function: protein dimerization activity (GO:0046983)	AUX/IAA protein (IPR003311), Transcriptional factor B3 (IPR003340), Auxin response factor (IPR010525), Aux/IAA-ARF-dimerisation (IPR011525), DNA-binding pseudobarrel domain (IPR015300)
395	Os01t0236300-02	Similar to Auxin response factor 18.	chr01	7547049	7551856	+	Biological Process: regulation of transcription, DNA-dependent (GO:0006355), Biological Process: response to hormone stimulus (GO:0009725), Cellular Component: nucleus (GO:0005634), Molecular Function: DNA binding (GO:0003677), Molecular Function: protein dimerization activity (GO:0046983)	AUX/IAA protein (IPR003311), Transcriptional factor B3 (IPR003340), Auxin response factor (IPR010525), Aux/IAA-ARF-dimerisation (IPR011525), DNA-binding pseudobarrel domain (IPR015300)
396	Os01t0236400-01	Similar to protein ABIL1.	chr01	7557338	7560496	+
397	Os01t0236700-01	Octicosapeptide/Phox/Bem1p domain containing protein.	chr01	7571236	7576792	+	Molecular Function: protein binding (GO:0005515)	Phox/Bem1p (IPR000270), Plant regulator RWP-RK (IPR003035)
398	Os01t0236700-02	Hypothetical conserved gene.	chr01	7575974	7576732	+	Molecular Function: protein binding (GO:0005515)	Phox/Bem1p (IPR000270)
399	Os01t0236800-01	Similar to predicted protein.	chr01	7578100	7582923	-	Biological Process: polysaccharide catabolic process (GO:0000272), Biological Process: carbohydrate metabolic process (GO:0005975), Molecular Function: catalytic activity (GO:0003824), Molecular Function: beta-amylase activity (GO:0016161), Molecular Function: cation binding (GO:0043169)	Glycoside hydrolase, family 14 (IPR001554), Glycoside hydrolase, subgroup, catalytic domain (IPR013781), Glycoside hydrolase, superfamily (IPR017853)
400	Os01t0236900-00	Hypothetical protein.	chr01	7579824	7582828	+
401	Os01t0237000-01	Uncharacterised protein family UPF0497, trans-membrane plant subgroup domain containing protein.	chr01	7588191	7589529	+		Uncharacterised protein family UPF0497, trans-membrane plant subgroup (IPR006459), Uncharacterised protein family UPF0497, trans-membrane plant (IPR006702)
402	Os01t0237100-01	Phosphoglycerate mutase domain containing protein.	chr01	7590433	7592743	-		Histidine phosphatase superfamily, clade-1 (IPR013078)
403	Os01t0237200-00	Conserved hypothetical protein.	chr01	7594516	7595607	-
404	Os01t0237366-00	NAD(P)-binding domain containing protein.	chr01	7605441	7606545	-	Molecular Function: nucleotide binding (GO:0000166)	NmrA-like (IPR008030), NAD(P)-binding domain (IPR016040)
405	Os01t0237400-00	Hypothetical conserved gene.	chr01	7615973	7617208	-
406	Os01t0237500-01	NmrA-like family protein.	chr01	7619082	7620013	-
407	Os01t0237750-00	Hypothetical conserved gene.	chr01	7624002	7624487	-	Molecular Function: nucleotide binding (GO:0000166)	NmrA-like (IPR008030), NAD(P)-binding domain (IPR016040)
408	Os01t0238200-02	Conserved hypothetical protein.	chr01	7652967	7656516	-
409	Os01t0238200-01	Conserved hypothetical protein.	chr01	7654059	7656516	-
410	Os01t0238287-00	Hypothetical protein.	chr01	7656089	7656431	+
411	Os01t0238375-01	Hypothetical protein.	chr01	7660812	7661458	+
412	Os01t0238500-01	Similar to Branched-chain-amino-acid aminotransferase-like protein 3, chloroplast precursor.	chr01	7665423	7668089	+	Biological Process: metabolic process (GO:0008152), Molecular Function: catalytic activity (GO:0003824)	Aminotransferase, class IV (IPR001544)
413	Os01t0238500-02	Similar to Branched-chain-amino-acid aminotransferase-like protein 3, chloroplast precursor.	chr01	7665477	7668076	+	Biological Process: metabolic process (GO:0008152), Molecular Function: catalytic activity (GO:0003824)	Aminotransferase, class IV (IPR001544)
414	Os01t0238600-01	Nucleic acid-binding, OB-fold domain containing protein.	chr01	7670071	7672734	+		Nucleic acid-binding, OB-fold (IPR012340), Nucleic acid-binding, OB-fold-like (IPR016027)
415	Os01t0238700-01	Oligopeptide transporter OPT superfamily protein.	chr01	7673033	7676401	+	Biological Process: transmembrane transport (GO:0055085)	Oligopeptide transporter OPT superfamily (IPR004813)
416	Os01t0238800-02	Similar to NFD6 (NUCLEAR FUSION DEFECTIVE 6).	chr01	7677180	7678845	-
417	Os01t0238800-01	Hypothetical conserved gene.	chr01	7677217	7678862	-
418	Os01t0238850-00	Hypothetical gene.	chr01	7677950	7678911	+
419	Os01t0238900-01	Similar to Protein SOF1.	chr01	7679009	7685849	+	Molecular Function: protein binding (GO:0005515)	WD40 repeat (IPR001680), WD40 repeat-like-containing domain (IPR011046), WD40/YVTN repeat-like-containing domain (IPR015943), WD40-repeat-containing domain (IPR017986), WD40 repeat, conserved site (IPR019775), WD40 repeat, subgroup (IPR019781), WD40 repeat 2 (IPR019782), G-protein beta WD-40 repeat (IPR020472)
420	Os01t0239000-02	Similar to Phosphate starvation regulator protein (Regulatory protein of P- starvation acclimation response Psr1).	chr01	7686901	7693781	-	Biological Process: regulation of transcription, DNA-dependent (GO:0006355), Molecular Function: DNA binding (GO:0003677), Molecular Function: protein binding (GO:0005515)	Myb-like DNA-binding domain, SHAQKYF class (IPR006447), Homeodomain-like (IPR009057), Homeodomain-related (IPR012287), Myb, DNA-binding (IPR014778), Transcription regulator HTH, Myb-type, DNA-binding (IPR017930)
421	Os01t0239000-01	Hypothetical conserved gene.	chr01	7692648	7693984	-
422	Os01t0239100-01	Heat shock protein DnaJ family protein.	chr01	7712339	7717634	+	Biological Process: protein folding (GO:0006457), Molecular Function: heat shock protein binding (GO:0031072), Molecular Function: unfolded protein binding (GO:0051082)	Heat shock protein DnaJ, N-terminal (IPR001623), Chaperone DnaJ, C-terminal (IPR002939), Heat shock protein DnaJ (IPR003095), HSP40/DnaJ peptide-binding (IPR008971), Heat shock protein DnaJ, conserved site (IPR018253)
423	Os01t0239100-02	Heat shock protein DnaJ family protein.	chr01	7712349	7721253	+	Biological Process: protein folding (GO:0006457), Molecular Function: heat shock protein binding (GO:0031072), Molecular Function: unfolded protein binding (GO:0051082)	Heat shock protein DnaJ, N-terminal (IPR001623), Chaperone DnaJ, C-terminal (IPR002939), Heat shock protein DnaJ (IPR003095), HSP40/DnaJ peptide-binding (IPR008971), Heat shock protein DnaJ, conserved site (IPR018253)
424	Os01t0239150-00	Hypothetical protein.	chr01	7712627	7717022	-
425	Os01t0239200-01	Similar to Phophate translocator (Fragment).	chr01	7718270	7722217	-	Biological Process: transport (GO:0006810), Cellular Component: integral to membrane (GO:0016021), Molecular Function: transporter activity (GO:0005215)	Tpt phosphate/phosphoenolpyruvate translocator (IPR004696), Domain of unknown function DUF250 (IPR004853)
426	Os01t0239300-01	Conserved hypothetical protein.	chr01	7724314	7725532	+
427	Os01t0239700-01	Similar to Leucine-rich receptor-like protein kinase.	chr01	7739074	7742756	+	Biological Process: protein phosphorylation (GO:0006468), Molecular Function: protein kinase activity (GO:0004672), Molecular Function: protein serine/threonine kinase activity (GO:0004674), Molecular Function: protein binding (GO:0005515), Molecular Function: ATP binding (GO:0005524), Molecular Function: transferase activity, transferring phosphorus-containing groups (GO:0016772)	Protein kinase, catalytic domain (IPR000719), Leucine-rich repeat (IPR001611), Serine/threonine-protein kinase, active site (IPR008271), Protein kinase-like domain (IPR011009), Leucine-rich repeat-containing N-terminal, type 2 (IPR013210), Concanavalin A-like lectin/glucanase, subgroup (IPR013320), Protein kinase, ATP binding site (IPR017441), Serine/threonine-protein kinase-like domain (IPR01744…
428	Os01t0239700-02	Similar to Leucine-rich receptor-like protein kinase.	chr01	7739130	7742878	+	Biological Process: protein phosphorylation (GO:0006468), Molecular Function: protein kinase activity (GO:0004672), Molecular Function: protein serine/threonine kinase activity (GO:0004674), Molecular Function: protein binding (GO:0005515), Molecular Function: ATP binding (GO:0005524), Molecular Function: transferase activity, transferring phosphorus-containing groups (GO:0016772)	Protein kinase, catalytic domain (IPR000719), Leucine-rich repeat (IPR001611), Serine/threonine-protein kinase, active site (IPR008271), Protein kinase-like domain (IPR011009), Leucine-rich repeat-containing N-terminal, type 2 (IPR013210), Concanavalin A-like lectin/glucanase, subgroup (IPR013320), Protein kinase, ATP binding site (IPR017441), Serine/threonine-protein kinase-like domain (IPR01744…
429	Os01t0239700-03	Similar to predicted protein.	chr01	7741174	7742872	+	Biological Process: protein phosphorylation (GO:0006468), Molecular Function: protein kinase activity (GO:0004672), Molecular Function: protein serine/threonine kinase activity (GO:0004674), Molecular Function: protein tyrosine kinase activity (GO:0004713), Molecular Function: ATP binding (GO:0005524), Molecular Function: transferase activity, transferring phosphorus-containing groups (GO:0016772)	Protein kinase, catalytic domain (IPR000719), Serine/threonine-protein kinase, catalytic domain (IPR002290), Serine/threonine-protein kinase, active site (IPR008271), Protein kinase-like domain (IPR011009), Protein kinase, ATP binding site (IPR017441), Serine/threonine-protein kinase-like domain (IPR017442), Tyrosine-protein kinase, catalytic domain (IPR020635)
430	Os01t0240600-01	Hypothetical conserved gene.	chr01	7771395	7774272	+		Domain of unknown function DUF1618 (IPR011676)
431	Os01t0240700-00	Hypothetical conserved gene.	chr01	7776045	7778090	+		Domain of unknown function DUF1618 (IPR011676)
432	Os01t0240725-00	Hypothetical protein.	chr01	7776076	7776733	-
433	Os01t0241000-01	Conserved hypothetical protein.	chr01	7804166	7805788	+
434	Os01t0241100-01	Conserved hypothetical protein.	chr01	7806682	7810887	-
435	Os01t0241400-01	CC-type glutaredoxin, Regulation of pre-harvest sprouting	chr01	7817704	7818394	+	Biological Process: cell redox homeostasis (GO:0045454), Molecular Function: electron transfer activity (GO:0009055), Molecular Function: protein disulfide oxidoreductase activity (GO:0015035)	Thioredoxin-like superfamily (IPR036249), Glutaredoxin-like, plant II (IPR011905), Glutaredoxin (IPR002109)
436	Os01t0242200-01	Zinc finger, C2H2-type domain containing protein.	chr01	7847490	7849833	+	Cellular Component: intracellular (GO:0005622), Molecular Function: nucleic acid binding (GO:0003676), Molecular Function: zinc ion binding (GO:0008270)	Zinc finger, C2H2 (IPR007087), Zinc finger, C2H2-type/integrase, DNA-binding (IPR013087), Zinc finger, C2H2-like (IPR015880)
437	Os01t0242300-01	Optic atrophy 3 family protein.	chr01	7852689	7855760	+		Optic atrophy 3-like (IPR010754)
438	Os01t0242333-00	Non-protein coding transcript.	chr01	7852782	7854147	-
439	Os01t0242400-01	Lateral organ boundaries, LOB domain containing protein.	chr01	7856373	7857611	+		Lateral organ boundaries, LOB (IPR004883)
440	Os01t0242450-00	Non-protein coding transcript.	chr01	7856518	7857344	-
441	Os01t0242500-01	D-tyrosyl-tRNA(Tyr) deacylase family protein.	chr01	7857828	7860061	-	Biological Process: D-amino acid catabolic process (GO:0019478), Cellular Component: cytoplasm (GO:0005737), Molecular Function: hydrolase activity, acting on ester bonds (GO:0016788)	D-tyrosyl-tRNA(Tyr) deacylase (IPR003732), D-Tyr tRNAtyr deacylase-like domain (IPR023509)
442	Os01t0242600-01	C2 calcium-dependent membrane targeting domain containing protein.	chr01	7862065	7867775	-	Molecular Function: protein binding (GO:0005515)	C2 calcium-dependent membrane targeting (IPR000008), C2 calcium/lipid-binding domain, CaLB (IPR008973), C2 membrane targeting protein (IPR018029)
443	Os01t0242600-02	C2 calcium-dependent membrane targeting domain containing protein.	chr01	7862088	7867709	-	Molecular Function: protein binding (GO:0005515)	C2 calcium-dependent membrane targeting (IPR000008), C2 calcium/lipid-binding domain, CaLB (IPR008973), C2 membrane targeting protein (IPR018029)
444	Os01t0242800-00	Hypothetical protein.	chr01	7871885	7876344	-
445	Os01t0242900-01	Similar to 60S ribosomal protein L18A.	chr01	7876239	7878758	+	Biological Process: translation (GO:0006412), Cellular Component: ribosome (GO:0005840), Molecular Function: structural constituent of ribosome (GO:0003735)	Ribosomal protein L18a (IPR021138)
446	Os01t0242900-02	Conserved hypothetical protein.	chr01	7876239	7878776	+
447	Os01t0243000-01	Similar to triacylglycerol lipase.	chr01	7880003	7882578	-
448	Os01t0243100-01	Similar to Kinesin.	chr01	7891541	7894719	+	Biological Process: microtubule-based movement (GO:0007018), Molecular Function: microtubule motor activity (GO:0003777), Molecular Function: ATP binding (GO:0005524)	Kinesin, motor domain (IPR001752), Kinesin, motor region, conserved site (IPR019821)
449	Os01t0243200-02	Biopterin transport-related protein BT1 family protein.	chr01	7894961	7898120	-		Biopterin transport-related protein BT1 (IPR004324), Major facilitator superfamily domain, general substrate transporter (IPR016196)
450	Os01t0243200-01	Similar to integral membrane transporter family protein.	chr01	7894965	7900550	-
451	Os01t0243300-01	Hypothetical protein.	chr01	7900010	7900874	+
452	Os01t0243400-01	Hypothetical conserved gene.	chr01	7903316	7903956	-
453	Os01t0243450-00	Non-protein coding transcript.	chr01	7903637	7904872	+
454	Os01t0243600-00	Conserved hypothetical protein.	chr01	7926858	7927564	-
455	Os01t0243700-02	Similar to Beta-1,3-glucanase-like protein.	chr01	7928090	7929712	-		X8 (IPR012946)
456	Os01t0243700-01	Similar to Beta-1,3-glucanase-like protein.	chr01	7928156	7929762	-		X8 (IPR012946)
457	Os01t0243800-01	Hypothetical conserved gene.	chr01	7932090	7933689	-
458	Os01t0243901-00	Hypothetical protein.	chr01	7942924	7943837	+
459	Os01t0244000-00	Domain of unknown function DUF1618 domain containing protein.	chr01	7945561	7946955	-		Domain of unknown function DUF1618 (IPR011676)
460	Os01t0244150-00	Similar to J075123K08, full insert sequence.	chr01	7969745	7970752	-		Domain of unknown function DUF1618 (IPR011676)
461	Os01t0244400-01	Protein of unknown function DUF1618 domain containing protein.	chr01	7971864	7974941	-		Domain of unknown function DUF1618 (IPR011676)
462	Os01t0244966-00	Non-protein coding transcript.	chr01	8002631	8003176	-
463	Os01t0245000-00	Conserved hypothetical protein.	chr01	8004164	8005216	-
464	Os01t0245532-00	Similar to J075123K08, full insert sequence.	chr01	8023787	8025021	-		Domain of unknown function DUF1618 (IPR011676)
465	Os01t0245600-00	Conserved hypothetical protein.	chr01	8030884	8031842	+
466	Os01t0245700-00	Domain of unknown function DUF1618 domain containing protein.	chr01	8033763	8035082	-		Domain of unknown function DUF1618 (IPR011676)
467	Os01t0245901-00	Domain of unknown function DUF1618 domain containing protein.	chr01	8038422	8039750	-		Domain of unknown function DUF1618 (IPR011676)
468	Os01t0246100-01	Zinc finger, RING/FYVE/PHD-type domain containing protein.	chr01	8047388	8055598	-	Biological Process: regulation of transcription, DNA-dependent (GO:0006355), Cellular Component: nucleus (GO:0005634), Molecular Function: transcription cofactor activity (GO:0003712), Molecular Function: histone acetyltransferase activity (GO:0004402), Molecular Function: protein binding (GO:0005515), Molecular Function: zinc ion binding (GO:0008270)	Zinc finger, TAZ-type (IPR000197), Zinc finger, ZZ-type (IPR000433), Zinc finger, PHD-type (IPR001965), Zinc finger, FYVE/PHD-type (IPR011011), Zinc finger, RING/FYVE/PHD-type (IPR013083), Histone H3-K56 acetyltransferase, RTT109 (IPR013178), Zinc finger, PHD-type, conserved site (IPR019786)
469	Os01t0246200-00	Similar to TCP-domain protein.	chr01	8057414	8062717	-
470	Os01t0246400-01	Similar to Low molecular mass early light-inducible protein HV90, chloroplast precursor (ELIP).	chr01	8061858	8062892	+		Chlorophyll A-B binding protein (IPR022796), Chlorophyll a/b binding protein domain (IPR023329)
471	Os01t0246500-01	Similar to Minus dominance protein.	chr01	8064860	8069013	-		Plant regulator RWP-RK (IPR003035)
472	Os01t0246601-00	Protein of unknown function DUF296 domain containing protein.	chr01	8071122	8071808	-		Domain of unknown function DUF296 (IPR005175)
473	Os01t0246700-01	Similar to WRKY transcription factor 1.	chr01	8084184	8086980	+
474	Os01t0247500-01	Protein kinase, core domain containing protein.	chr01	8125672	8128014	-	Biological Process: protein phosphorylation (GO:0006468), Molecular Function: protein kinase activity (GO:0004672), Molecular Function: protein serine/threonine kinase activity (GO:0004674), Molecular Function: ATP binding (GO:0005524), Molecular Function: transferase activity, transferring phosphorus-containing groups (GO:0016772)	Protein kinase, catalytic domain (IPR000719), Serine/threonine-protein kinase, active site (IPR008271), Protein kinase-like domain (IPR011009), Protein kinase, ATP binding site (IPR017441), Serine/threonine-protein kinase-like domain (IPR017442)
475	Os01t0247550-00	Hypothetical protein.	chr01	8126659	8127416	+
476	Os01t0247600-01	Conserved hypothetical protein.	chr01	8130258	8130932	+
477	Os01t0247700-01	Similar to inner membrane transport protein.	chr01	8132699	8135454	-	Biological Process: transmembrane transport (GO:0055085), Cellular Component: integral to membrane (GO:0016021)	C4-dicarboxylate transporter/malic acid transport protein (IPR004695)
478	Os01t0247900-01	AWPM-19-like family protein.	chr01	8146442	8148059	-		AWPM-19-like (IPR008390)
479	Os01t0248000-01	Stigma-specific protein Stig1 family protein.	chr01	8152795	8153685	-		Stigma-specific protein Stig1 (IPR006969)
480	Os01t0248300-00	Similar to Pathogen-related protein.	chr01	8159901	8161287	+
481	Os01t0248350-00	Hypothetical protein.	chr01	8159918	8160693	-
482	Os01t0248400-01	Similar to Isocitrate dehydrogenase (Fragment).	chr01	8170309	8175903	+	Biological Process: isocitrate metabolic process (GO:0006102), Biological Process: oxidation-reduction process (GO:0055114), Molecular Function: magnesium ion binding (GO:0000287), Molecular Function: isocitrate dehydrogenase (NADP+) activity (GO:0004450), Molecular Function: oxidoreductase activity, acting on the CH-OH group of donors, NAD or NADP as acceptor (GO:0016616), Molecular Function: NA…	Isocitrate dehydrogenase NADP-dependent, eukaryotic-type (IPR004790), Isocitrate/isopropylmalate dehydrogenase, conserved site (IPR019818), Isopropylmalate dehydrogenase-like domain (IPR024084)
483	Os01t0248450-00	Non-protein coding transcript.	chr01	8171631	8175231	-
484	Os01t0248500-01	Similar to Pathogen-related protein.	chr01	8175587	8177889	-
485	Os01t0248600-01	GINS complex, Psf2 component family protein.	chr01	8179040	8183108	-	Biological Process: DNA replication (GO:0006260), Cellular Component: nucleus (GO:0005634)	GINS complex, subunit Psf2 (IPR007257), GINS complex, subunit Psf2, subgroup (IPR016906), GINS complex (IPR021151)
486	Os01t0248701-00	Terpenoid synthase domain containing protein.	chr01	8191032	8192289	+	Biological Process: isoprenoid biosynthetic process (GO:0008299)	Polyprenyl synthetase (IPR000092), Terpenoid synthase (IPR008949), Polyprenyl synthetase-related (IPR017446)
487	Os01t0248800-01	Conserved hypothetical protein.	chr01	8193455	8194256	+
488	Os01t0248850-00	Hypothetical gene.	chr01	8193566	8194125	-
489	Os01t0248900-01	Alpha-expansin, Mediation of the cell extension and growth, Root system architecture	chr01	8196083	8197096	-	Biological Process: plant-type cell wall organization (GO:0009664), Cellular Component: extracellular region (GO:0005576)	Expansin/Lol pI (IPR007118), Expansin (IPR002963), RlpA-like protein, double-psi beta-barrel domain (IPR009009), Expansin/pollen allergen, DPBB domain (IPR007112), Expansin, cellulose-binding-like domain (IPR007117)
490	Os01t0249050-00	Hypothetical protein.	chr01	8201959	8202513	+
491	Os01t0249100-00	Similar to Expansin-A9.	chr01	8202020	8202772	-	Biological Process: plant-type cell wall organization (GO:0009664), Cellular Component: extracellular region (GO:0005576)	Expansin (IPR002963), Expansin/pollen allergen, DPBB domain (IPR007112), Pollen allergen/expansin, C-terminal (IPR007117), Expansin/Lol pI (IPR007118), Barwin-related endoglucanase (IPR009009), Barwin-like endoglucanase (IPR014733)
492	Os01t0249200-01	Similar to Nectarin 1 precursor (EC 1.15.1.1) (Superoxide dismutase [Mn]).	chr01	8203832	8206969	-	Cellular Component: apoplast (GO:0048046), Molecular Function: manganese ion binding (GO:0030145), Molecular Function: nutrient reservoir activity (GO:0045735)	Germin (IPR001929), Cupin 1 (IPR006045), Cupin, RmlC-type (IPR011051), RmlC-like jelly roll fold (IPR014710), Germin, manganese binding site (IPR019780)
493	Os01t0249300-01	Lg106-like family protein.	chr01	8212469	8215133	-		Endosulphine (IPR006760)
494	Os01t0249300-02	Lg106-like family protein.	chr01	8212480	8215091	-		Endosulphine (IPR006760)
495	Os01t0249700-00	Heavy metal-associated domain, HMA domain containing protein.	chr01	8229331	8229903	+	Biological Process: metal ion transport (GO:0030001), Molecular Function: metal ion binding (GO:0046872)	Heavy metal-associated domain, HMA (IPR006121)
496	Os01t0249800-00	Heavy metal-associated domain, HMA domain containing protein.	chr01	8233016	8233871	+	Biological Process: metal ion transport (GO:0030001), Molecular Function: metal ion binding (GO:0046872)	Heavy metal-associated domain, HMA (IPR006121)
497	Os01t0249900-01	Protein of unknown function DUF573 family protein.	chr01	8234625	8235833	-		Protein of unknown function DUF573 (IPR007592)
498	Os01t0250200-00	Conserved hypothetical protein.	chr01	8247740	8247985	-
499	Os01t0250600-01	Conserved hypothetical protein.	chr01	8269588	8272570	+
500	Os01t0250900-01	HAD superfamily (subfamily IG) hydrolase, 5'-Nucleotidase protein.	chr01	8275474	8283959	+		HAD-superfamily hydrolase, subfamily IG, 5&apos;-nucleotidase (IPR008380), HAD-like domain (IPR023214)
501	Os01t0251000-01	Protein of unknown function DUF3769 domain containing protein.	chr01	8284469	8289120	+		Protein of unknown function DUF3769 (IPR022244)
502	Os01t0251100-01	Similar to 50S ribosomal protein L3-2, chloroplast precursor.	chr01	8291337	8296089	+	Biological Process: translation (GO:0006412), Cellular Component: intracellular (GO:0005622), Cellular Component: ribosome (GO:0005840), Molecular Function: structural constituent of ribosome (GO:0003735)	Ribosomal protein L3 (IPR000597), Translation elongation/initiation factor/Ribosomal, beta-barrel (IPR009000), Ribosomal protein L3, conserved site (IPR019926), Ribosomal protein L3, bacterial/organelle-type (IPR019927)
503	Os01t0251100-02	Similar to 50S ribosomal protein L3-2, chloroplast precursor.	chr01	8291372	8296089	+	Biological Process: translation (GO:0006412), Cellular Component: intracellular (GO:0005622), Cellular Component: ribosome (GO:0005840), Molecular Function: structural constituent of ribosome (GO:0003735)	Ribosomal protein L3 (IPR000597), Translation elongation/initiation factor/Ribosomal, beta-barrel (IPR009000), Ribosomal protein L3, conserved site (IPR019926), Ribosomal protein L3, bacterial/organelle-type (IPR019927)
504	Os01t0251200-01	Zinc finger, C2H2-like domain containing protein.	chr01	8297615	8302401	+	Cellular Component: intracellular (GO:0005622), Molecular Function: protein binding (GO:0005515), Molecular Function: zinc ion binding (GO:0008270)	Zinc finger, RING-type (IPR001841), Zinc finger, C2H2-like (IPR015880)
505	Os01t0251200-02	Hypothetical conserved gene.	chr01	8300599	8301367	+
506	Os01t0251400-01	Conserved hypothetical protein.	chr01	8305749	8306555	-
507	Os01t0252100-01	Similar to Glycogen synthase kinase-3 homolog MsK-3 (EC 2.7.1.-).	chr01	8329791	8333933	+	Biological Process: protein phosphorylation (GO:0006468), Molecular Function: protein kinase activity (GO:0004672), Molecular Function: protein serine/threonine kinase activity (GO:0004674), Molecular Function: protein tyrosine kinase activity (GO:0004713), Molecular Function: ATP binding (GO:0005524), Molecular Function: transferase activity, transferring phosphorus-containing groups (GO:0016772)	Protein kinase, catalytic domain (IPR000719), Serine/threonine-protein kinase, catalytic domain (IPR002290), Serine/threonine-protein kinase, active site (IPR008271), Protein kinase-like domain (IPR011009), Protein kinase, ATP binding site (IPR017441), Serine/threonine-protein kinase-like domain (IPR017442), Tyrosine-protein kinase, catalytic domain (IPR020635)
508	Os01t0252100-02	Similar to Glycogen synthase kinase-3 homolog MsK-3 (EC 2.7.1.-).	chr01	8329957	8333859	+	Biological Process: protein phosphorylation (GO:0006468), Molecular Function: protein kinase activity (GO:0004672), Molecular Function: protein serine/threonine kinase activity (GO:0004674), Molecular Function: protein tyrosine kinase activity (GO:0004713), Molecular Function: ATP binding (GO:0005524), Molecular Function: transferase activity, transferring phosphorus-containing groups (GO:0016772)	Protein kinase, catalytic domain (IPR000719), Serine/threonine-protein kinase, catalytic domain (IPR002290), Serine/threonine-protein kinase, active site (IPR008271), Protein kinase-like domain (IPR011009), Protein kinase, ATP binding site (IPR017441), Serine/threonine-protein kinase-like domain (IPR017442), Tyrosine-protein kinase, catalytic domain (IPR020635)
509	Os01t0252100-03	Similar to Glycogen synthase kinase-3 homolog MsK-3 (EC 2.7.1.-).	chr01	8330980	8333859	+	Biological Process: protein phosphorylation (GO:0006468), Molecular Function: protein kinase activity (GO:0004672), Molecular Function: protein serine/threonine kinase activity (GO:0004674), Molecular Function: protein tyrosine kinase activity (GO:0004713), Molecular Function: ATP binding (GO:0005524), Molecular Function: transferase activity, transferring phosphorus-containing groups (GO:0016772)	Protein kinase, catalytic domain (IPR000719), Serine/threonine-protein kinase, catalytic domain (IPR002290), Serine/threonine-protein kinase, active site (IPR008271), Protein kinase-like domain (IPR011009), Protein kinase, ATP binding site (IPR017441), Serine/threonine-protein kinase-like domain (IPR017442), Tyrosine-protein kinase, catalytic domain (IPR020635)
510	Os01t0252150-00	Hypothetical protein.	chr01	8331441	8333267	-
511	Os01t0252200-01	Zinc finger, CCCH-type domain containing protein.	chr01	8334519	8338574	+	Molecular Function: nucleic acid binding (GO:0003676), Molecular Function: zinc ion binding (GO:0008270)	Zinc finger, CCCH-type (IPR000571), Zinc finger, U1-type (IPR003604), Zinc finger, U1-C type (IPR013085)
512	Os01t0252300-01	Conserved hypothetical protein.	chr01	8339050	8339456	-
513	Os01t0252400-01	Hypothetical gene.	chr01	8339174	8339709	+
514	Os01t0252600-00	Similar to predicted protein.	chr01	8344471	8346041	+
515	Os01t0252900-01	Zinc finger, CCHC-type domain containing protein.	chr01	8359017	8362270	-	Molecular Function: nucleic acid binding (GO:0003676), Molecular Function: zinc ion binding (GO:0008270)	Zinc finger, CCHC-type (IPR001878), Zinc finger, CCHC retroviral-type (IPR013084)
516	Os01t0253000-01	Similar to LpimPth3.	chr01	8364116	8365711	-	Biological Process: protein phosphorylation (GO:0006468), Molecular Function: protein kinase activity (GO:0004672), Molecular Function: protein serine/threonine kinase activity (GO:0004674), Molecular Function: ATP binding (GO:0005524), Molecular Function: transferase activity, transferring phosphorus-containing groups (GO:0016772)	Protein kinase, catalytic domain (IPR000719), Serine-threonine/tyrosine-protein kinase (IPR001245), Serine/threonine-protein kinase, active site (IPR008271), Protein kinase-like domain (IPR011009), Protein kinase, ATP binding site (IPR017441)
517	Os01t0253050-00	Conserved hypothetical protein.	chr01	8364602	8366959	+
518	Os01t0253100-01	Similar to Avr9/Cf-9 induced kinase 1.	chr01	8367189	8375401	-	Biological Process: protein phosphorylation (GO:0006468), Molecular Function: protein kinase activity (GO:0004672), Molecular Function: protein serine/threonine kinase activity (GO:0004674), Molecular Function: ATP binding (GO:0005524), Molecular Function: transferase activity, transferring phosphorus-containing groups (GO:0016772)	Protein kinase, catalytic domain (IPR000719), Serine/threonine-protein kinase, active site (IPR008271), Protein kinase-like domain (IPR011009), Protein kinase, ATP binding site (IPR017441), Serine/threonine-protein kinase-like domain (IPR017442)
519	Os01t0253100-02	Hypothetical conserved gene.	chr01	8367277	8373144	-	Biological Process: protein phosphorylation (GO:0006468), Molecular Function: protein kinase activity (GO:0004672), Molecular Function: protein serine/threonine kinase activity (GO:0004674), Molecular Function: protein tyrosine kinase activity (GO:0004713), Molecular Function: ATP binding (GO:0005524), Molecular Function: transferase activity, transferring phosphorus-containing groups (GO:0016772)	Protein kinase, catalytic domain (IPR000719), Serine/threonine-protein kinase, catalytic domain (IPR002290), Serine/threonine-protein kinase, active site (IPR008271), Protein kinase-like domain (IPR011009), Protein kinase, ATP binding site (IPR017441), Serine/threonine-protein kinase-like domain (IPR017442), Tyrosine-protein kinase, catalytic domain (IPR020635)
520	Os01t0253200-00	Similar to pectinesterase inhibitor domain containing protein.	chr01	8380048	8380745	+	Molecular Function: enzyme inhibitor activity (GO:0004857), Molecular Function: pectinesterase activity (GO:0030599)	Pectinesterase inhibitor (IPR006501)
521	Os01t0253300-01	Importin alpha-1a subunit.	chr01	8382115	8387230	+	Biological Process: protein import into nucleus (GO:0006606), Biological Process: intracellular protein transport (GO:0006886), Cellular Component: nucleus (GO:0005634), Cellular Component: cytoplasm (GO:0005737), Molecular Function: binding (GO:0005488), Molecular Function: protein binding (GO:0005515), Molecular Function: protein transporter activity (GO:0008565)	Armadillo (IPR000225), Importin-alpha, importin-beta-binding domain (IPR002652), Armadillo-like helical (IPR011989), Armadillo-type fold (IPR016024)
522	Os01t0253300-02	Importin alpha-1a subunit.	chr01	8382155	8387231	+	Biological Process: protein import into nucleus (GO:0006606), Biological Process: intracellular protein transport (GO:0006886), Cellular Component: nucleus (GO:0005634), Cellular Component: cytoplasm (GO:0005737), Molecular Function: binding (GO:0005488), Molecular Function: protein binding (GO:0005515), Molecular Function: protein transporter activity (GO:0008565)	Armadillo (IPR000225), Importin-alpha, importin-beta-binding domain (IPR002652), Armadillo-like helical (IPR011989), Armadillo-type fold (IPR016024)
523	Os01t0253400-01	Protein of unknown function DUF1218 family protein.	chr01	8387589	8388859	-		Protein of unknown function DUF1218 (IPR009606)
524	Os01t0253500-01	Conserved hypothetical protein.	chr01	8394453	8395607	+
525	Os01t0253600-01	Replication factor A protein 3 domain containing protein.	chr01	8396551	8398584	-		Nucleic acid-binding, OB-fold (IPR012340), Replication factor A protein 3 (IPR013970), Nucleic acid-binding, OB-fold-like (IPR016027)
526	Os01t0253800-00	Conserved hypothetical protein.	chr01	8401548	8402325	-
527	Os01t0253900-01	Similar to triacylglycerol lipase.	chr01	8404247	8408348	+	Biological Process: lipid metabolic process (GO:0006629), Molecular Function: triglyceride lipase activity (GO:0004806)	Lipase, class 3 (IPR002921)
528	Os01t0253900-02	Lipase, class 3 family protein.	chr01	8404250	8408353	+	Biological Process: lipid metabolic process (GO:0006629), Molecular Function: triglyceride lipase activity (GO:0004806)	Lipase, class 3 (IPR002921)
529	Os01t0254000-01	Similar to NTGB2 (Fragment).	chr01	8413916	8418925	-	Biological Process: intracellular protein transport (GO:0006886), Biological Process: small GTPase mediated signal transduction (GO:0007264), Cellular Component: intracellular (GO:0005622), Molecular Function: GTP binding (GO:0005525)	Small GTP-binding protein domain (IPR005225), Small GTPase superfamily, SAR1-type (IPR006687), Small GTPase superfamily, ARF/SAR type (IPR006689), Small GTPase superfamily, ARF type (IPR024156)
530	Os01t0254100-01	Similar to CTV.2.	chr01	8420995	8430280	-	Molecular Function: protein binding (GO:0005515)	WD40 repeat (IPR001680), LisH dimerisation motif (IPR006594), CTLH, C-terminal LisH motif (IPR006595), WD40 repeat-like-containing domain (IPR011046), WD40/YVTN repeat-like-containing domain (IPR015943), WD40-repeat-containing domain (IPR017986), WD40 repeat, conserved site (IPR019775), WD40 repeat, subgroup (IPR019781), WD40 repeat 2 (IPR019782)
531	Os01t0254100-02	Similar to Lissencephaly type-1-like homology motif; CTLH, C-terminal to LisH motif; Nitrous oxide reductase, N-terminal; WD40-like; Quinonprotein alcohol dehydrogenase-like.	chr01	8422323	8430151	-	Molecular Function: protein binding (GO:0005515)	WD40 repeat (IPR001680), LisH dimerisation motif (IPR006594), CTLH, C-terminal LisH motif (IPR006595), WD40 repeat-like-containing domain (IPR011046), WD40/YVTN repeat-like-containing domain (IPR015943), WD40-repeat-containing domain (IPR017986), WD40 repeat, conserved site (IPR019775), WD40 repeat, subgroup (IPR019781), WD40 repeat 2 (IPR019782)
532	Os01t0254200-01	Conserved hypothetical protein.	chr01	8444463	8447053	-
533	Os01t0254300-00	Pectinesterase (EC 3.1.1.11) (Fragment).	chr01	8447731	8451489	-	Biological Process: cell wall modification (GO:0042545), Cellular Component: cell wall (GO:0005618), Molecular Function: enzyme inhibitor activity (GO:0004857), Molecular Function: pectinesterase activity (GO:0030599)	Pectinesterase, catalytic (IPR000070), Pectinesterase inhibitor (IPR006501), Pectin lyase fold/virulence factor (IPR011050), Pectin lyase fold (IPR012334), Pectinesterase, active site (IPR018040)
534	Os01t0254350-00	Hypothetical gene.	chr01	8448082	8450982	+
535	Os01t0254400-00	Hypothetical conserved gene.	chr01	8455342	8456022	+
536	Os01t0254800-01	Hypothetical conserved gene.	chr01	8466262	8469359	-
537	Os01t0254850-00	Hypothetical conserved gene.	chr01	8471334	8472108	-
538	Os01t0254900-01	Similar to Syntaxin 22 (AtSYP22) (AtVAM3).	chr01	8475504	8479452	-	Biological Process: intracellular protein transport (GO:0006886), Biological Process: vesicle-mediated transport (GO:0016192), Cellular Component: membrane (GO:0016020), Molecular Function: SNAP receptor activity (GO:0005484), Molecular Function: protein binding (GO:0005515)	Target SNARE coiled-coil domain (IPR000727), Syntaxin, N-terminal (IPR006011), Syntaxin/epimorphin, conserved site (IPR006012), t-SNARE (IPR010989)
539	Os01t0254950-01	Hypothetical gene.	chr01	8478876	8479870	+
540	Os01t0255000-01	Similar to Soluble epoxide hydrolase.	chr01	8486578	8489618	+	Molecular Function: catalytic activity (GO:0003824)	Epoxide hydrolase-like (IPR000639)
541	Os01t0255100-01	Similar to Soluble epoxide hydrolase.	chr01	8490582	8492345	+	Molecular Function: catalytic activity (GO:0003824)	Epoxide hydrolase-like (IPR000639)
542	Os01t0255700-00	Conserved hypothetical protein.	chr01	8523748	8525716	-
543	Os01t0256300-00	Conserved hypothetical protein.	chr01	8535675	8537264	-
544	Os01t0256400-01	Similar to Dynein light chain 1 protein DLC-1 (Fragment).	chr01	8540755	8544460	+	Biological Process: microtubule-based process (GO:0007017), Cellular Component: microtubule associated complex (GO:0005875)	Dynein light chain, type 1/2 (IPR001372), Dynein light chain, type 1/2, conserved site (IPR019763)
545	Os01t0256500-02	Similar to ZnI.	chr01	8546065	8546869	-
546	Os01t0256600-01	Ribosomal protein L18/L5 domain containing protein.	chr01	8555289	8557146	-	Biological Process: translation (GO:0006412), Cellular Component: intracellular (GO:0005622), Cellular Component: ribosome (GO:0005840), Molecular Function: structural constituent of ribosome (GO:0003735)	Ribosomal protein L18/L5 (IPR005484)
547	Os01t0256800-01	Similar to zinc finger helicase family protein.	chr01	8560625	8569629	-	Molecular Function: nucleotide binding (GO:0000166), Molecular Function: nucleic acid binding (GO:0003676), Molecular Function: helicase activity (GO:0004386), Molecular Function: ATP binding (GO:0005524), Molecular Function: ATP-dependent helicase activity (GO:0008026), Molecular Function: zinc ion binding (GO:0008270), Molecular Function: nucleoside-triphosphatase activity (GO:0017111)	Zinc finger, CCCH-type (IPR000571), Helicase, C-terminal (IPR001650), ATPase, AAA+ type, core (IPR003593), DNA/RNA helicase, DEAD/DEAH box type, N-terminal (IPR011545), DEAD-like helicase (IPR014001)
548	Os01t0256800-02	Hypothetical conserved gene.	chr01	8560807	8563767	-	Molecular Function: nucleic acid binding (GO:0003676), Molecular Function: zinc ion binding (GO:0008270)	Zinc finger, CCCH-type (IPR000571)
549	Os01t0256900-01	Similar to SmX6 protein.	chr01	8570880	8574555	-		Like-Sm ribonucleoprotein (LSM) domain (IPR001163), Like-Sm ribonucleoprotein (LSM) domain, eukaryotic/archaea-type (IPR006649), Like-Sm ribonucleoprotein (LSM)-related domain (IPR010920)
550	Os01t0257100-01	Rapid ALkalinization Factor family protein.	chr01	8577244	8577934	-		Rapid ALkalinization Factor (IPR008801)
551	Os01t0257300-01	Similar to FPF1.	chr01	8586157	8586941	-
552	Os01t0257400-01	Zinc finger, CCCH-type domain containing protein.	chr01	8593792	8599448	-	Molecular Function: nucleic acid binding (GO:0003676), Molecular Function: zinc ion binding (GO:0008270)	Zinc finger, CCCH-type (IPR000571)
553	Os01t0257900-01	Hypothetical protein.	chr01	8626746	8630032	-
554	Os01t0258000-01	Conserved hypothetical protein.	chr01	8627878	8629136	+
555	Os01t0258100-02	Hypothetical conserved gene.	chr01	8630485	8633521	-
556	Os01t0258100-01	Hypothetical conserved gene.	chr01	8631638	8633592	-
557	Os01t0258600-00	Similar to predicted protein.	chr01	8657086	8658466	+
558	Os01t0258700-01	Zinc finger, CCCH-type domain containing protein.	chr01	8659413	8664796	-	Molecular Function: nucleic acid binding (GO:0003676), Molecular Function: zinc ion binding (GO:0008270)	Zinc finger, CCCH-type (IPR000571)
559	Os01t0258700-03	Similar to zinc finger CCCH type domain-containing protein ZFN-like 1.	chr01	8659466	8664774	-	Molecular Function: nucleic acid binding (GO:0003676), Molecular Function: zinc ion binding (GO:0008270)	Zinc finger, CCCH-type (IPR000571)
560	Os01t0259200-01	Similar to serine/threonine protein kinase PBS1.	chr01	8683011	8687579	+	Biological Process: protein phosphorylation (GO:0006468), Molecular Function: protein kinase activity (GO:0004672), Molecular Function: protein serine/threonine kinase activity (GO:0004674), Molecular Function: protein tyrosine kinase activity (GO:0004713), Molecular Function: ATP binding (GO:0005524), Molecular Function: transferase activity, transferring phosphorus-containing groups (GO:0016772)	Protein kinase, catalytic domain (IPR000719), Serine/threonine-protein kinase, catalytic domain (IPR002290), Serine/threonine-protein kinase, active site (IPR008271), Protein kinase-like domain (IPR011009), Protein kinase, ATP binding site (IPR017441), Serine/threonine-protein kinase-like domain (IPR017442), Tyrosine-protein kinase, catalytic domain (IPR020635)
561	Os01t0259200-02	Similar to Protein kinase.	chr01	8683097	8687536	+	Biological Process: protein phosphorylation (GO:0006468), Molecular Function: protein kinase activity (GO:0004672), Molecular Function: protein serine/threonine kinase activity (GO:0004674), Molecular Function: ATP binding (GO:0005524), Molecular Function: transferase activity, transferring phosphorus-containing groups (GO:0016772)	Protein kinase, catalytic domain (IPR000719), Serine/threonine-protein kinase, active site (IPR008271), Protein kinase-like domain (IPR011009), Protein kinase, ATP binding site (IPR017441), Serine/threonine-protein kinase-like domain (IPR017442)
562	Os01t0259300-01	Non-protein coding transcript.	chr01	8689258	8689797	-
563	Os01t0259400-01	Armadillo-type fold domain containing protein.	chr01	8691829	8699628	-	Biological Process: protein phosphorylation (GO:0006468), Molecular Function: protein kinase activity (GO:0004672), Molecular Function: protein serine/threonine kinase activity (GO:0004674), Molecular Function: binding (GO:0005488), Molecular Function: ATP binding (GO:0005524), Molecular Function: transferase activity, transferring phosphorus-containing groups (GO:0016772)	Protein kinase, catalytic domain (IPR000719), Serine/threonine-protein kinase, catalytic domain (IPR002290), Serine/threonine-protein kinase, active site (IPR008271), Protein kinase-like domain (IPR011009), Armadillo-like helical (IPR011989), Armadillo-type fold (IPR016024), Protein kinase, ATP binding site (IPR017441), Serine/threonine-protein kinase-like domain (IPR017442)
564	Os01t0259600-01	Similar to phosphoadenosine phosphosulfate (PAPS) reductase family protein.	chr01	8701299	8708612	-	Biological Process: metabolic process (GO:0008152), Molecular Function: catalytic activity (GO:0003824)	Phosphoadenosine phosphosulphate reductase (IPR002500), Rossmann-like alpha/beta/alpha sandwich fold (IPR014729)
565	Os01t0259900-00	Conserved hypothetical protein.	chr01	8718704	8720961	+
566	Os01t0259933-00	Non-protein coding transcript.	chr01	8722666	8723283	+
567	Os01t0259966-00	Non-protein coding transcript.	chr01	8728995	8729512	+
568	Os01t0260000-01	Protein prenyltransferase domain containing protein.	chr01	8733343	8734486	+	Molecular Function: binding (GO:0005488)	Pentatricopeptide repeat (IPR002885), Tetratricopeptide-like helical (IPR011990)
569	Os01t0260100-01	Similar to Kinesin heavy chain (Fragment).	chr01	8734767	8741720	-	Biological Process: microtubule-based movement (GO:0007018), Molecular Function: microtubule motor activity (GO:0003777), Molecular Function: ATP binding (GO:0005524)	Kinesin, motor domain (IPR001752)
570	Os01t0260500-01	Hypothetical conserved gene.	chr01	8747124	8753486	+	Biological Process: defense response (GO:0006952), Molecular Function: protein binding (GO:0005515), Molecular Function: ADP binding (GO:0043531)	Disease resistance protein (IPR000767), Leucine-rich repeat (IPR001611), NB-ARC (IPR002182), Leucine-rich repeat, typical subtype (IPR003591)
571	Os01t0260700-01	Similar to PUR ALPHA-1.	chr01	8759419	8763457	+		PUR-alpha/beta/gamma, DNA/RNA-binding (IPR006628)
572	Os01t0260800-01	Conserved hypothetical protein.	chr01	8767828	8773510	+
573	Os01t0260950-00	Conserved hypothetical protein.	chr01	8783473	8785385	+
574	Os01t0261000-01	Hypothetical gene.	chr01	8786513	8786927	-
575	Os01t0261100-01	Zinc finger, RING-type domain containing protein.	chr01	8786623	8792221	+	Molecular Function: protein binding (GO:0005515), Molecular Function: zinc ion binding (GO:0008270)	Zinc finger, RING-type (IPR001841), Zinc finger, RING/FYVE/PHD-type (IPR013083), Zinc finger, C3HC4 RING-type (IPR018957)
576	Os01t0261200-02	Similar to NAC domain-containing protein 74.	chr01	8792649	8794891	-
577	Os01t0261200-01	NAC transcription factor, Heat stress tolerance	chr01	8792650	8797358	-	Biological Process: regulation of transcription, DNA-templated (GO:0006355), Molecular Function: DNA binding (GO:0003677)	NAC domain superfamily (IPR036093), NAC domain (IPR003441)
578	Os01t0261500-01	Similar to Nucleoside-diphosphate-sugar epimerase.	chr01	8809389	8813008	+	Molecular Function: nucleotide binding (GO:0000166)	NAD(P)-binding domain (IPR016040)
579	Os01t0261500-02	NAD(P)-binding domain containing protein.	chr01	8810826	8812972	+	Molecular Function: nucleotide binding (GO:0000166)	NAD(P)-binding domain (IPR016040)
580	Os01t0261500-03	Similar to Nucleoside-diphosphate-sugar epimerase.	chr01	8811515	8813014	+	Molecular Function: nucleotide binding (GO:0000166)	NAD(P)-binding domain (IPR016040)
581	Os01t0261600-00	Similar to agmatine coumaroyltransferase.	chr01	8816863	8818318	-	Molecular Function: transferase activity, transferring acyl groups other than amino-acyl groups (GO:0016747)	Transferase (IPR003480), Chloramphenicol acetyltransferase-like domain (IPR023213)
582	Os01t0261700-01	Similar to Agmatine coumaroyltransferase.	chr01	8821136	8822609	-	Molecular Function: transferase activity, transferring acyl groups other than amino-acyl groups (GO:0016747)	Transferase (IPR003480), Chloramphenicol acetyltransferase-like domain (IPR023213)
583	Os01t0262000-00	Similar to agmatine coumaroyltransferase.	chr01	8835574	8837029	+	Molecular Function: transferase activity, transferring acyl groups other than amino-acyl groups (GO:0016747)	Transferase (IPR003480), Chloramphenicol acetyltransferase-like domain (IPR023213)
584	Os01t0262401-00	Hypothetical genes.	chr01	8856489	8857022	-
585	Os01t0262500-01	TRAM/LAG1/CLN8 homology domain domain containing protein.	chr01	8883493	8885388	+	Cellular Component: integral to membrane (GO:0016021)	TRAM/LAG1/CLN8 homology domain (IPR006634)
586	Os01t0262600-01	Glycosyltransferase, Pollen wall formation	chr01	8885632	8892462	-	Biological Process: biosynthetic process (GO:0009058)	Glycosyl transferase, family 1 (IPR001296)
587	Os01t0262700-01	Similar to predicted protein.	chr01	8892598	8898652	+
588	Os01t0262700-02	Hypothetical conserved gene.	chr01	8892615	8900134	+
589	Os01t0263000-00	Similar to Peroxidase.	chr01	8903598	8905415	-	Biological Process: response to oxidative stress (GO:0006979), Biological Process: oxidation-reduction process (GO:0055114), Molecular Function: peroxidase activity (GO:0004601), Molecular Function: heme binding (GO:0020037)	Plant peroxidase (IPR000823), Haem peroxidase, plant/fungal/bacterial (IPR002016), Haem peroxidase (IPR010255), Peroxidases heam-ligand binding site (IPR019793), Peroxidase, active site (IPR019794)
590	Os01t0263300-01	Similar to Peroxidase 72 precursor (EC 1.11.1.7) (Atperox P72) (PRXR8) (ATP6a).	chr01	8917756	8919968	+	Biological Process: response to oxidative stress (GO:0006979), Biological Process: oxidation-reduction process (GO:0055114), Molecular Function: peroxidase activity (GO:0004601), Molecular Function: heme binding (GO:0020037)	Plant peroxidase (IPR000823), Haem peroxidase, plant/fungal/bacterial (IPR002016), Haem peroxidase (IPR010255), Peroxidases heam-ligand binding site (IPR019793), Peroxidase, active site (IPR019794)
591	Os01t0263400-00	Pentatricopeptide repeat domain containing protein.	chr01	8921590	8924862	-	Molecular Function: binding (GO:0005488)	Pentatricopeptide repeat (IPR002885), Tetratricopeptide-like helical (IPR011990)
592	Os01t0263500-01	Similar to predicted protein.	chr01	8925072	8929646	+		Mediator complex, subunit Med27 (IPR021627)
593	Os01t0263600-01	U5 snRNP-associated 102 kDa protein (U5-102 kDa protein).	chr01	8931299	8948832	+	Biological Process: nuclear mRNA splicing, via spliceosome (GO:0000398), Biological Process: RNA processing (GO:0006396), Cellular Component: intracellular (GO:0005622), Cellular Component: nucleus (GO:0005634), Molecular Function: binding (GO:0005488), Molecular Function: protein binding (GO:0005515)	RNA-processing protein, HAT helix (IPR003107), PRP1 splicing factor, N-terminal (IPR010491), Tetratricopeptide-like helical (IPR011990), Tetratricopeptide repeat-containing (IPR013026)
594	Os01t0263600-02	Similar to U5 snRNP-associated 102 kDa protein (U5-102 kDa protein).	chr01	8933109	8948825	+	Biological Process: RNA processing (GO:0006396), Cellular Component: intracellular (GO:0005622), Molecular Function: binding (GO:0005488), Molecular Function: protein binding (GO:0005515)	RNA-processing protein, HAT helix (IPR003107), Tetratricopeptide-like helical (IPR011990), Tetratricopeptide repeat-containing (IPR013026)
595	Os01t0264000-01	Dof transcription factor, Promotion of nutrient ion uptake and accumulation	chr01	8949337	8951088	-	Biological Process: regulation of transcription, DNA-templated (GO:0006355), Molecular Function: DNA binding (GO:0003677)	Zinc finger, Dof-type (IPR003851)
596	Os01t0263900-00	Hypothetical protein.	chr01	8949612	8950796	+
597	Os01t0264100-00	Similar to UDP-glucose pyrophosphorylase.	chr01	8961073	8966217	+	Biological Process: metabolic process (GO:0008152), Molecular Function: nucleotidyltransferase activity (GO:0016779)	UTP--glucose-1-phosphate uridylyltransferase (IPR002618), UTP--glucose-1-phosphate uridylyltransferase, subgroup (IPR016267)
598	Os01t0264125-00	Non-protein coding transcript.	chr01	8964284	8965882	-
599	Os01t0264400-01	Conserved hypothetical protein.	chr01	8986253	8987397	+
600	Os01t0264500-01	Similar to T11I18.15 protein.	chr01	8988911	8992577	+
601	Os01t0264600-00	Conserved hypothetical protein.	chr01	8995314	8996892	+
602	Os01t0264700-01	Cellular retinaldehyde binding/alpha-tocopherol transport family protein.	chr01	9004534	9008221	-	Biological Process: transport (GO:0006810), Cellular Component: intracellular (GO:0005622), Molecular Function: transporter activity (GO:0005215)	Cellular retinaldehyde binding/alpha-tocopherol transport (IPR001071), Cellular retinaldehyde-binding/triple function, C-terminal (IPR001251), Cellular retinaldehyde-binding/triple function, N-terminal (IPR008273), Phosphatidylinositol transfer protein-like, N-terminal (IPR011074)
603	Os01t0264900-01	Non-protein coding transcript.	chr01	9016289	9016581	+
604	Os01t0265000-01	Geranylgeranyl reductase, &alpha;-tocopherol synthesis	chr01	9018144	9019762	+	Biological Process: photosynthesis (GO:0015979), Biological Process: chlorophyll biosynthetic process (GO:0015995), Biological Process: cofactor biosynthetic process (GO:0051188), Biological Process: oxidation-reduction process (GO:0055114), Molecular Function: oxidoreductase activity, acting on the CH-CH group of donors, NAD or NADP as acceptor (GO:0016628), Molecular Function: geranylgeranyl re…	FAD/NAD(P)-binding domain superfamily (IPR036188), Geranylgeranyl reductase family (IPR011777), Geranylgeranyl reductase, plant/prokaryotic (IPR010253), Geranylgeranyl reductase, plant/cyanobacteria (IPR011774), FAD-binding domain (IPR002938)
605	Os01t0265100-01	Similar to ADP-ribosylation factor.	chr01	9019849	9024048	-	Biological Process: small GTPase mediated signal transduction (GO:0007264), Cellular Component: intracellular (GO:0005622), Molecular Function: GTP binding (GO:0005525)	Small GTP-binding protein domain (IPR005225), Small GTPase superfamily, ARF/SAR type (IPR006689), Small GTPase superfamily, ARF type (IPR024156)
606	Os01t0265200-01	Mitochondrial carrier protein, Early leaf development	chr01	9024970	9028874	-	Biological Process: transmembrane transport (GO:0055085)	Mitochondrial carrier protein (IPR002067), Mitochondrial carrier domain (IPR023395), Mitochondrial substrate/solute carrier (IPR018108)
607	Os01t0265400-01	Conserved hypothetical protein.	chr01	9040786	9053950	-
608	Os01t0265400-02	Conserved hypothetical protein.	chr01	9041580	9046083	-
609	Os01t0265700-01	Conserved hypothetical protein.	chr01	9057858	9061022	-
610	Os01t0265800-01	RNA binding protein, RNA metabolism, Regulation of genes important for plant growth and development	chr01	9063968	9066786	-	Molecular Function: nucleic acid binding (GO:0003676)	Nucleotide-binding alpha-beta plait domain superfamily (IPR012677), RNA-binding domain superfamily (IPR035979), RNA recognition motif domain (IPR000504)
611	Os01t0265800-02	RNA-binding region RNP-1 (RNA recognition motif) domain containing protein.	chr01	9064028	9066738	-	Molecular Function: nucleotide binding (GO:0000166), Molecular Function: nucleic acid binding (GO:0003676)	RNA recognition motif domain (IPR000504), Nucleotide-binding, alpha-beta plait (IPR012677)
612	Os01t0265900-00	Similar to translin family protein.	chr01	9067828	9071250	-	Molecular Function: sequence-specific DNA binding (GO:0043565)	Translin (IPR002848), Translin, N-terminal (IPR016068), Translin, C-terminal (IPR016069)
613	Os01t0266000-01	RNA-binding protein Lupus La domain containing protein.	chr01	9074613	9083794	+		Protein of unknown function DM15 (IPR006607), RNA-binding protein Lupus La (IPR006630), Winged helix-turn-helix transcription repressor DNA-binding (IPR011991)
614	Os01t0266100-01	Similar to RING finger family protein.	chr01	9088088	9089013	+	Molecular Function: protein binding (GO:0005515), Molecular Function: zinc ion binding (GO:0008270)	Zinc finger, RING-type (IPR001841), Zinc finger, RING/FYVE/PHD-type (IPR013083), Zinc finger, C3HC4 RING-type (IPR018957)
615	Os01t0266200-01	Conserved hypothetical protein.	chr01	9095173	9099512	+
616	Os01t0266400-01	Conserved hypothetical protein.	chr01	9113868	9114423	+
617	Os01t0266500-01	Phenazine biosynthesis PhzC/PhzF protein family protein.	chr01	9114579	9117424	-	Biological Process: biosynthetic process (GO:0009058), Molecular Function: catalytic activity (GO:0003824)	Phenazine biosynthesis PhzC/PhzF protein (IPR003719)
618	Os01t0266600-02	Thioredoxin fold domain containing protein.	chr01	9118186	9121337	-	Molecular Function: oxidoreductase activity (GO:0016491)	Thioredoxin-like fold (IPR012336), Redoxin (IPR013740)
619	Os01t0266600-01	Thioredoxin fold domain containing protein.	chr01	9118207	9121411	-	Molecular Function: oxidoreductase activity (GO:0016491)	Thioredoxin-like fold (IPR012336), Redoxin (IPR013740)
620	Os01t0266800-01	Cystinosin/ERS1p repeat containing protein.	chr01	9133740	9140430	-		Cystinosin/ERS1p repeat (IPR006603)
621	Os01t0267050-01	Non-protein coding transcript.	chr01	9159637	9160291	-
622	Os01t0267100-01	MT-A70 family protein.	chr01	9159753	9165677	+	Biological Process: nucleobase-containing compound metabolic process (GO:0006139), Biological Process: methylation (GO:0032259), Molecular Function: nucleic acid binding (GO:0003676), Molecular Function: methyltransferase activity (GO:0008168)	DNA methylase, N-6 adenine-specific, conserved site (IPR002052), MT-A70 (IPR007757)
623	Os01t0267200-01	Similar to 26S proteasome non-ATPase regulatory subunit 14 (26S proteasome regulatory subunit rpn11).	chr01	9166370	9169867	+	Molecular Function: protein binding (GO:0005515)	Mov34/MPN/PAD-1 (IPR000555)
624	Os01t0267300-00	Hypothetical conserved gene.	chr01	9171328	9172907	+	Molecular Function: serine-type endopeptidase inhibitor activity (GO:0004867)	Protease inhibitor I4, serpin (IPR000215), Protease inhibitor I4, serpin, plant (IPR015554), Protease inhibitor I4, serpin, conserved site (IPR023795), Serpin domain (IPR023796)
625	Os01t0267400-01	Similar to cell number regulator 5.	chr01	9173234	9175902	-		Uncharacterised protein family Cys-rich (IPR006461)
626	Os01t0267600-01	Sad1/UNC-like, C-terminal domain containing protein.	chr01	9179218	9181984	-		Sad1/UNC-like, C-terminal (IPR012919)
627	Os01t0267800-00	Serine/threonine protein kinase domain containing protein.	chr01	9192164	9193439	+	Biological Process: protein phosphorylation (GO:0006468), Molecular Function: protein kinase activity (GO:0004672), Molecular Function: protein serine/threonine kinase activity (GO:0004674), Molecular Function: ATP binding (GO:0005524), Molecular Function: transferase activity, transferring phosphorus-containing groups (GO:0016772)	Protein kinase, catalytic domain (IPR000719), Serine-threonine/tyrosine-protein kinase (IPR001245), Serine/threonine-protein kinase, active site (IPR008271), Protein kinase-like domain (IPR011009), Protein kinase, ATP binding site (IPR017441)
628	Os01t0267900-01	Calmodulin, Ca<sup>2+</sup> sensor, Ca<sup>2+</sup> signalling	chr01	9195546	9198962	-	Molecular Function: calcium ion binding (GO:0005509)	EF-hand domain pair (IPR011992), Phosphoglycolate phosphatase, domain 2 (IPR023198), EF-hand domain (IPR002048), EF-Hand 1, calcium-binding site (IPR018247)
629	Os01t0268000-01	Hypothetical protein.	chr01	9201354	9202372	+
630	Os01t0268100-01	Similar to Major facilitator superfamily antiporter.	chr01	9204377	9211643	-	Biological Process: transmembrane transport (GO:0055085), Cellular Component: integral to membrane (GO:0016021)	Major facilitator superfamily (IPR011701), Major facilitator superfamily domain, general substrate transporter (IPR016196), Major facilitator superfamily domain (IPR020846)
631	Os01t0268201-00	Non-protein coding transcript.	chr01	9204472	9209552	+
632	Os01t0268300-01	Similar to DNA gyrase B subunit.	chr01	9225213	9237025	+	Biological Process: DNA topological change (GO:0006265), Cellular Component: chromosome (GO:0005694), Molecular Function: DNA binding (GO:0003677), Molecular Function: DNA topoisomerase (ATP-hydrolyzing) activity (GO:0003918), Molecular Function: ATP binding (GO:0005524)	DNA topoisomerase, type IIA, subunit B (IPR000565), DNA topoisomerase, type IIA, subunit B/N-terminal (IPR001241), DNA topoisomerase, type IIA, subunit B, C-terminal (IPR002288), ATPase-like, ATP-binding domain (IPR003594), DNA gyrase, subunit B (IPR011557), DNA topoisomerase, type IIA, subunit B, domain 2 (IPR013506), DNA topoisomerase, type IIA, subunit B/N-terminal, alpha-beta (IPR013759), DNA…
633	Os01t0268300-02	Similar to DNA gyrase subunit B, chloroplastic/mitochondrial.	chr01	9231565	9236957	+	Biological Process: DNA topological change (GO:0006265), Cellular Component: chromosome (GO:0005694), Molecular Function: DNA binding (GO:0003677), Molecular Function: DNA topoisomerase (ATP-hydrolyzing) activity (GO:0003918), Molecular Function: ATP binding (GO:0005524)	DNA topoisomerase, type IIA, subunit B (IPR000565), DNA topoisomerase, type IIA, subunit B/N-terminal (IPR001241), DNA topoisomerase, type IIA, subunit B, C-terminal (IPR002288), Toprim domain (IPR006171), DNA topoisomerase, type IIA, subunit B, domain 2 (IPR013506), DNA topoisomerase, type IIA, subunit B/N-terminal, alpha-beta (IPR013759), DNA topoisomerase, type IIA, central (IPR013760), Riboso…
634	Os01t0268600-01	Glycoside hydrolase, family 31 protein.	chr01	9245577	9253404	+	Biological Process: carbohydrate metabolic process (GO:0005975), Molecular Function: catalytic activity (GO:0003824), Molecular Function: hydrolase activity, hydrolyzing O-glycosyl compounds (GO:0004553), Molecular Function: carbohydrate binding (GO:0030246)	Glycoside hydrolase, family 31 (IPR000322), Glycoside hydrolase-type carbohydrate-binding (IPR011013), Glycoside hydrolase, superfamily (IPR017853)
635	Os01t0268700-00	Protein of unknown function DUF617, plant domain containing protein.	chr01	9253938	9255239	-		Protein of unknown function DUF617, plant (IPR006460)
636	Os01t0268733-00	Hypothetical gene.	chr01	9254067	9255167	+
637	Os01t0268800-01	Ubiquitin-associated/translation elongation factor EF1B, N-terminal, eukaryote domain containing protein.	chr01	9259148	9264227	+	Molecular Function: protein binding (GO:0005515)	Ubiquitin-associated/translation elongation factor EF1B, N-terminal (IPR000449), UBA-like (IPR009060), Ubiquitin-associated/translation elongation factor EF1B, N-terminal, eukaryote (IPR015940)
638	Os01t0268800-02	Ubiquitin-associated/translation elongation factor EF1B, N-terminal, eukaryote domain containing protein.	chr01	9259171	9264216	+	Molecular Function: protein binding (GO:0005515)	Ubiquitin-associated/translation elongation factor EF1B, N-terminal (IPR000449), UBA-like (IPR009060), Ubiquitin-associated/translation elongation factor EF1B, N-terminal, eukaryote (IPR015940)
639	Os01t0268900-01	Conserved hypothetical protein.	chr01	9264978	9268375	+
640	Os01t0269000-01	Similar to Hydroxymethylglutaryl-CoA lyase.	chr01	9268690	9272912	-	Biological Process: metabolic process (GO:0008152), Molecular Function: catalytic activity (GO:0003824), Molecular Function: hydroxymethylglutaryl-CoA lyase activity (GO:0004419)	Hydroxymethylglutaryl-CoA lyase, active site (IPR000138), Pyruvate carboxyltransferase (IPR000891), Aldolase-type TIM barrel (IPR013785)
641	Os01t0269100-01	Similar to Rab proteins geranylgeranyltransferase component A 2 (Rab escort protein 2) (REP-2) (Choroideraemia-like protein).	chr01	9273876	9279031	-		GDP dissociation inhibitor (IPR018203)
642	Os01t0269500-01	Conserved hypothetical protein.	chr01	9293193	9299711	+
643	Os01t0269550-01	Hypothetical protein.	chr01	9300816	9304312	+
644	Os01t0269800-00	NB-ARC domain containing protein.	chr01	9316276	9318060	+	Molecular Function: ADP binding (GO:0043531)	NB-ARC (IPR002182)
645	Os01t0269900-01	Key component of H2A.Z exchange complex	chr01	9319015	9323339	-		Actin family (IPR004000)
646	Os01t0269950-00	Hypothetical protein.	chr01	9319350	9321607	+
647	Os01t0270100-02	Similar to cDNA clone:001-200-C04, full insert sequence.	chr01	9325669	9329229	-	Molecular Function: cysteine-type endopeptidase inhibitor activity (GO:0004869)	Proteinase inhibitor I25, cystatin (IPR000010), Proteinase inhibitor I25, cystatin, conserved site (IPR018073), Proteinase inhibitor I25, cystatin, conserved region (IPR020381)
648	Os01t0270100-01	Similar to Cysteine protease inhibitor.	chr01	9325699	9329331	-	Molecular Function: cysteine-type endopeptidase inhibitor activity (GO:0004869)	Proteinase inhibitor I25, cystatin (IPR000010), Proteinase inhibitor I25, cystatin, conserved site (IPR018073), Proteinase inhibitor I25, cystatin, conserved region (IPR020381)
649	Os01t0270300-01	Similar to Cationic peroxidase isozyme 40K precursor.	chr01	9339815	9342225	+	Biological Process: response to oxidative stress (GO:0006979), Biological Process: oxidation-reduction process (GO:0055114), Molecular Function: peroxidase activity (GO:0004601), Molecular Function: heme binding (GO:0020037)	Plant peroxidase (IPR000823), Haem peroxidase, plant/fungal/bacterial (IPR002016), Haem peroxidase (IPR010255), Peroxidases heam-ligand binding site (IPR019793)
650	Os01t0270300-02	Similar to Cationic peroxidase isozyme 40K precursor.	chr01	9340040	9342240	+	Biological Process: response to oxidative stress (GO:0006979), Biological Process: oxidation-reduction process (GO:0055114), Molecular Function: peroxidase activity (GO:0004601), Molecular Function: heme binding (GO:0020037)	Plant peroxidase (IPR000823), Haem peroxidase, plant/fungal/bacterial (IPR002016), Haem peroxidase (IPR010255), Peroxidases heam-ligand binding site (IPR019793)
651	Os01t0270501-00	Hypothetical protein.	chr01	9341228	9341966	-
652	Os01t0270700-00	Phosphatidylinositol 3-/4-kinase, catalytic domain containing protein.	chr01	9348658	9350721	+	Molecular Function: phosphotransferase activity, alcohol group as acceptor (GO:0016773)	Phosphatidylinositol 3-/4-kinase, catalytic (IPR000403)
653	Os01t0271000-01	Conserved hypothetical protein.	chr01	9370627	9373600	+
654	Os01t0271200-01	Similar to Glutamyl-tRNA synthetase.	chr01	9373756	9378200	-	Biological Process: translation (GO:0006412), Biological Process: tRNA aminoacylation for protein translation (GO:0006418), Biological Process: glutamyl-tRNA aminoacylation (GO:0006424), Biological Process: tRNA aminoacylation (GO:0043039), Cellular Component: cytoplasm (GO:0005737), Molecular Function: nucleotide binding (GO:0000166), Molecular Function: aminoacyl-tRNA ligase activity (GO:000481…	Glutamyl/glutaminyl-tRNA synthetase, class Ib (IPR000924), Aminoacyl-tRNA synthetase, class I, conserved site (IPR001412), Glutamyl-tRNA synthetase, class Ib, archaeal/eukaryotic cytosolic (IPR004526), Glutathione S-transferase, C-terminal-like (IPR010987), Ribosomal protein L25/Gln-tRNA synthetase, anti-codon-binding domain (IPR011035), Rossmann-like alpha/beta/alpha sandwich fold (IPR014729), R…
655	Os01t0271400-00	Peptidase S14, ClpP family protein.	chr01	9379123	9383262	-	Biological Process: proteolysis (GO:0006508), Molecular Function: serine-type endopeptidase activity (GO:0004252)	Peptidase S14, ClpP (IPR001907), Peptidase S14/S49 (IPR023562)
656	Os01t0271500-01	Similar to RUB-activating enzyme (Ubiquitin activating enzyme E1-like protein).	chr01	9386202	9390616	+	Biological Process: protein modification process (GO:0006464), Biological Process: protein neddylation (GO:0045116), Molecular Function: nucleotide binding (GO:0000166), Molecular Function: catalytic activity (GO:0003824), Molecular Function: ATP binding (GO:0005524), Molecular Function: small protein activating enzyme activity (GO:0008641), Molecular Function: acid-amino acid ligase activity (GO…	Ubiquitin-activating enzyme repeat (IPR000127), UBA/THIF-type NAD/FAD binding fold (IPR000594), Molybdenum cofactor biosynthesis, MoeB (IPR009036), E2 binding (IPR014929), NAD(P)-binding domain (IPR016040), Ubiquitin-activating enzyme, E1, active site (IPR018074), Ubiquitin-activating enzyme (IPR019572), Ubiquitin activating enzyme, alpha domain (IPR023318)
657	Os01t0271700-01	Conserved hypothetical protein.	chr01	9394143	9396611	-
658	Os01t0272600-01	Similar to Root determined nodulation 1.	chr01	9424556	9429189	+
659	Os01t0272650-00	Hypothetical protein.	chr01	9424753	9428782	-
660	Os01t0272700-00	Hypothetical conserved gene.	chr01	9429955	9430747	-	Molecular Function: copper ion binding (GO:0005507), Molecular Function: electron carrier activity (GO:0009055)	Plastocyanin-like (IPR003245), Cupredoxin (IPR008972)
661	Os01t0272800-01	Conserved hypothetical protein.	chr01	9431735	9434046	-
662	Os01t0272850-00	Hypothetical protein.	chr01	9431788	9435864	+
663	Os01t0272901-00	Conserved hypothetical protein.	chr01	9438930	9439364	+
664	Os01t0273000-01	Similar to 26 proteasome complex subunit DSS1 (Deleted in split hand/split foot protein 1) (Split hand/foot deleted protein 1).	chr01	9441654	9444212	-		DSS1/SEM1 (IPR007834)
665	Os01t0273100-01	Similar to Ubiquitin conjugating protein-like (Ubiquitin-conjugating enzyme) (Ubiquitinating enzyme).	chr01	9445685	9446494	+	Molecular Function: acid-amino acid ligase activity (GO:0016881)	Ubiquitin-conjugating enzyme, E2 (IPR000608), Ubiquitin-conjugating enzyme/RWD-like (IPR016135), Ubiquitin-conjugating enzyme, active site (IPR023313)
666	Os01t0273150-00	Hypothetical gene.	chr01	9447054	9450883	+
667	Os01t0273200-00	Conserved hypothetical protein.	chr01	9447788	9450787	-
668	Os01t0273300-01	BSD domain containing protein.	chr01	9454976	9456923	+		BSD (IPR005607)
669	Os01t0273500-01	Heat shock protein DnaJ, N-terminal domain containing protein.	chr01	9470130	9475187	+	Biological Process: protein folding (GO:0006457), Molecular Function: binding (GO:0005488), Molecular Function: protein binding (GO:0005515), Molecular Function: heat shock protein binding (GO:0031072), Molecular Function: unfolded protein binding (GO:0051082)	Tetratricopeptide TPR-1 (IPR001440), Heat shock protein DnaJ, N-terminal (IPR001623), Heat shock protein DnaJ (IPR003095), Tetratricopeptide-like helical (IPR011990), Tetratricopeptide repeat-containing (IPR013026), Tetratricopeptide repeat (IPR019734), Elongated TPR repeat-containing domain (IPR023114)
670	Os01t0273800-01	FAD-dependent pyridine nucleotide-disulphide oxidoreductase domain containing protein.	chr01	9488825	9493964	+	Biological Process: oxidation-reduction process (GO:0055114), Molecular Function: flavin-containing monooxygenase activity (GO:0004499), Molecular Function: oxidoreductase activity (GO:0016491), Molecular Function: flavin adenine dinucleotide binding (GO:0050660), Molecular Function: NADP binding (GO:0050661)	Pyridine nucleotide-disulphide oxidoreductase, class-II (IPR000103), FAD-dependent pyridine nucleotide-disulphide oxidoreductase (IPR013027), Flavin monooxygenase-like (IPR020946)
671	Os01t0273850-00	Hypothetical gene.	chr01	9492587	9492992	-
672	Os01t0273900-00	Conserved hypothetical protein.	chr01	9495603	9502985	+
673	Os01t0274100-00	Similar to disulfide oxidoreductase/ monooxygenase/ oxidoreductase.	chr01	9512985	9515102	+	Biological Process: oxidation-reduction process (GO:0055114), Molecular Function: flavin-containing monooxygenase activity (GO:0004499), Molecular Function: oxidoreductase activity (GO:0016491), Molecular Function: flavin adenine dinucleotide binding (GO:0050660), Molecular Function: NADP binding (GO:0050661)	Pyridine nucleotide-disulphide oxidoreductase, class-II (IPR000103), FAD-dependent pyridine nucleotide-disulphide oxidoreductase (IPR013027), Flavin monooxygenase-like (IPR020946)
674	Os01t0274201-00	Hypothetical gene.	chr01	9513637	9514004	-
675	Os01t0274300-01	Hypothetical protein.	chr01	9519722	9520278	+
676	Os01t0274500-00	Similar to Expansin-A11.	chr01	9526187	9526984	+	Biological Process: plant-type cell wall organization (GO:0009664), Cellular Component: extracellular region (GO:0005576)	Expansin (IPR002963), Expansin/pollen allergen, DPBB domain (IPR007112), Pollen allergen/expansin, C-terminal (IPR007117), Expansin/Lol pI (IPR007118), Barwin-related endoglucanase (IPR009009), Barwin-like endoglucanase (IPR014733)
677	Os01t0274601-01	Hypothetical gene.	chr01	9558283	9563016	+
678	Os01t0274800-01	R2R3-type MYB transcription factor, Sugar partitioning into anther	chr01	9567528	9569192	-	Biological Process: regulation of transcription, DNA-dependent (GO:0006355), Molecular Function: DNA binding (GO:0003677), Molecular Function: protein binding (GO:0005515)	SANT domain, DNA binding (IPR001005), Homeodomain-like (IPR009057), Homeodomain-related (IPR012287), Myb, DNA-binding (IPR014778), Myb transcription factor (IPR015495), Transcription regulator HTH, Myb-type, DNA-binding (IPR017930)
679	Os01t0274901-01	Hypothetical conserved gene.	chr01	9586809	9593449	+
680	Os01t0275200-00	Similar to Protein argonaute 15.	chr01	9613644	9619072	-	Molecular Function: nucleic acid binding (GO:0003676), Molecular Function: protein binding (GO:0005515)	Argonaute/Dicer protein, PAZ (IPR003100), Stem cell self-renewal protein Piwi (IPR003165), Ribonuclease H-like (IPR012337)
681	Os01t0275300-01	Conserved hypothetical protein.	chr01	9625243	9625889	+
682	Os01t0275500-00	Similar to Protein argonaute 15.	chr01	9626942	9630057	-
683	Os01t0275600-02	Similar to Protein argonaute 4A.	chr01	9631334	9633056	-	Molecular Function: nucleic acid binding (GO:0003676), Molecular Function: protein binding (GO:0005515)	Stem cell self-renewal protein Piwi (IPR003165), Ribonuclease H-like (IPR012337)
684	Os01t0275600-01	Similar to Argonaute 4 protein.	chr01	9631356	9638881	-	Molecular Function: nucleic acid binding (GO:0003676), Molecular Function: protein binding (GO:0005515)	Argonaute/Dicer protein, PAZ (IPR003100), Stem cell self-renewal protein Piwi (IPR003165), Ribonuclease H-like (IPR012337), Domain of unknown function DUF1785 (IPR014811)
685	Os01t0275700-00	Non-protein coding transcript.	chr01	9642417	9642487	-
686	Os01t0275800-01	Hypothetical gene.	chr01	9644431	9653253	+
687	Os01t0275900-00	Hypothetical conserved gene.	chr01	9644443	9647828	-
688	Os01t0275950-00	Hypothetical conserved gene.	chr01	9648667	9651434	-
689	Os01t0276000-01	Similar to 60S ribosomal protein L30.	chr01	9658174	9661275	-	Biological Process: translation (GO:0006412), Cellular Component: intracellular (GO:0005622), Cellular Component: ribosome (GO:0005840), Molecular Function: structural constituent of ribosome (GO:0003735)	Ribosomal protein L30e (IPR000231), Ribosomal protein L7Ae/L30e/S12e/Gadd45 (IPR004038), Ribosomal protein L30e, conserved site (IPR022991)
690	Os01t0276033-00	Non-protein coding transcript.	chr01	9658501	9661024	+
691	Os01t0276066-00	Non-protein coding transcript.	chr01	9659330	9659922	-
692	Os01t0276100-01	Similar to 3-isopropylmalate dehydrogenase, chloroplast precursor (EC 1.1.1.85) (Beta-IPM dehydrogenase) (IMDH) (3-IPM-DH).	chr01	9665409	9670111	+	Biological Process: tricarboxylic acid cycle (GO:0006099), Biological Process: oxidation-reduction process (GO:0055114), Molecular Function: magnesium ion binding (GO:0000287), Molecular Function: isocitrate dehydrogenase (NAD+) activity (GO:0004449), Molecular Function: oxidoreductase activity, acting on the CH-OH group of donors, NAD or NADP as acceptor (GO:0016616), Molecular Function: NAD bin…	Isocitrate/isopropylmalate dehydrogenase (IPR001804), Isocitrate dehydrogenase NAD-dependent (IPR004434), Isocitrate/isopropylmalate dehydrogenase, conserved site (IPR019818), Isopropylmalate dehydrogenase-like domain (IPR024084)
693	Os01t0276200-00	Similar to Mitochondrial import receptor subunit TOM40.	chr01	9671077	9676036	-	Biological Process: anion transport (GO:0006820), Biological Process: regulation of anion transport (GO:0044070), Biological Process: transmembrane transport (GO:0055085), Cellular Component: mitochondrial outer membrane (GO:0005741), Molecular Function: voltage-gated anion channel activity (GO:0008308)	Porin, eukaryotic type (IPR001925)
694	Os01t0276300-01	Similar to Group 3 late embryogenesis abundant protein (Fragment).	chr01	9679828	9680883	+
695	Os01t0276400-01	Similar to presenilin.	chr01	9682795	9684110	-	Cellular Component: integral to membrane (GO:0016021), Molecular Function: aspartic-type endopeptidase activity (GO:0004190)	Peptidase A22A, presenilin (IPR001108), Peptidase A22, presenilin signal peptide (IPR006639)
696	Os01t0276500-01	Similar to Histidine biosynthesis bifunctional protein hisIE, chloroplast precursor [Includes: Phosphoribosyl-AMP cyclohydrolase (EC 3.5.4.19) (PRA-CH); Phosphoribosyl-ATP pyrophosphatase (EC 3.6.1.31) (PRA-PH)].	chr01	9684848	9689506	-	Biological Process: histidine biosynthetic process (GO:0000105), Molecular Function: phosphoribosyl-AMP cyclohydrolase activity (GO:0004635), Molecular Function: phosphoribosyl-ATP diphosphatase activity (GO:0004636)	Phosphoribosyl-AMP cyclohydrolase (IPR002496), Phosphoribosyl-ATP pyrophosphohydrolase (IPR008179), Phosphoribosyl-ATP pyrophosphohydrolase-like (IPR021130)
697	Os01t0276500-02	Similar to Histidine biosynthesis bifunctional protein hisIE, chloroplast precursor [Includes: Phosphoribosyl-AMP cyclohydrolase (EC 3.5.4.19) (PRA-CH); Phosphoribosyl-ATP pyrophosphatase (EC 3.6.1.31) (PRA-PH)].	chr01	9684853	9689468	-	Biological Process: histidine biosynthetic process (GO:0000105), Molecular Function: phosphoribosyl-AMP cyclohydrolase activity (GO:0004635), Molecular Function: phosphoribosyl-ATP diphosphatase activity (GO:0004636)	Phosphoribosyl-AMP cyclohydrolase (IPR002496), Phosphoribosyl-ATP pyrophosphohydrolase (IPR008179), Phosphoribosyl-ATP pyrophosphohydrolase-like (IPR021130)
698	Os01t0276600-01	Zinc finger, RING/FYVE/PHD-type domain containing protein.	chr01	9690348	9692094	+	Molecular Function: protein binding (GO:0005515), Molecular Function: zinc ion binding (GO:0008270)	Zinc finger, RING-type (IPR001841), Zinc finger, RING/FYVE/PHD-type (IPR013083), Zinc finger, C3HC4 RING-type (IPR018957)
699	Os01t0276650-00	Non-protein coding transcript.	chr01	9691036	9691721	-
700	Os01t0276700-02	Similar to Pyruvate kinase, cytosolic isozyme (EC 2.7.1.40) (PK).	chr01	9694027	9699718	-	Biological Process: glycolysis (GO:0006096), Molecular Function: magnesium ion binding (GO:0000287), Molecular Function: catalytic activity (GO:0003824), Molecular Function: pyruvate kinase activity (GO:0004743), Molecular Function: potassium ion binding (GO:0030955)	Pyruvate kinase (IPR001697), Pyruvate kinase-like, insert domain (IPR011037), Pyruvate kinase, barrel (IPR015793), Pyruvate kinase, alpha/beta (IPR015794), Pyruvate kinase, C-terminal (IPR015795), Pyruvate kinase, beta-barrel insert domain (IPR015806), Pyruvate/Phosphoenolpyruvate kinase (IPR015813), Pyruvate kinase, active site (IPR018209)
701	Os01t0276700-03	Similar to Pyruvate kinase.	chr01	9694428	9695805	-	Biological Process: glycolysis (GO:0006096), Molecular Function: magnesium ion binding (GO:0000287), Molecular Function: catalytic activity (GO:0003824), Molecular Function: pyruvate kinase activity (GO:0004743), Molecular Function: potassium ion binding (GO:0030955)	Pyruvate kinase (IPR001697), Pyruvate kinase, barrel (IPR015793), Pyruvate kinase, alpha/beta (IPR015794), Pyruvate kinase, C-terminal (IPR015795), Pyruvate/Phosphoenolpyruvate kinase (IPR015813), Pyruvate kinase, active site (IPR018209)
702	Os01t0276700-04	Similar to Pyruvate kinase.	chr01	9694472	9695737	-	Biological Process: glycolysis (GO:0006096), Molecular Function: magnesium ion binding (GO:0000287), Molecular Function: catalytic activity (GO:0003824), Molecular Function: pyruvate kinase activity (GO:0004743), Molecular Function: potassium ion binding (GO:0030955)	Pyruvate kinase (IPR001697), Pyruvate kinase, barrel (IPR015793), Pyruvate kinase, alpha/beta (IPR015794), Pyruvate kinase, C-terminal (IPR015795), Pyruvate/Phosphoenolpyruvate kinase (IPR015813), Pyruvate kinase, active site (IPR018209)
703	Os01t0276700-01	Similar to Pyruvate kinase, cytosolic isozyme (EC 2.7.1.40) (PK).	chr01	9694494	9699817	-	Biological Process: glycolysis (GO:0006096), Molecular Function: magnesium ion binding (GO:0000287), Molecular Function: catalytic activity (GO:0003824), Molecular Function: pyruvate kinase activity (GO:0004743), Molecular Function: potassium ion binding (GO:0030955)	Pyruvate kinase (IPR001697), Pyruvate kinase-like, insert domain (IPR011037), Pyruvate kinase, barrel (IPR015793), Pyruvate kinase, alpha/beta (IPR015794), Pyruvate kinase, C-terminal (IPR015795), Pyruvate kinase, beta-barrel insert domain (IPR015806), Pyruvate/Phosphoenolpyruvate kinase (IPR015813), Pyruvate kinase, active site (IPR018209)
704	Os01t0276800-05	Similar to predicted protein.	chr01	9702737	9705021	-		Mannose-6-phosphate receptor, binding (IPR009011), Glucosidase II beta subunit-like (IPR012913)
705	Os01t0276800-01	Glucosidase II &beta; subunit, Potential switch between programmed cell death and autophagy	chr01	9702793	9709686	-	Molecular Function: protein binding (GO:0005515)	Mannose-6-phosphate receptor binding domain superfamily (IPR009011), Glucosidase II beta subunit, N-terminal (IPR028146), Glucosidase 2 subunit beta-like (IPR036607), Low-density lipoprotein (LDL) receptor class A repeat (IPR002172)
706	Os01t0276800-04	Similar to predicted protein.	chr01	9702793	9705153	-		Mannose-6-phosphate receptor, binding (IPR009011), Glucosidase II beta subunit-like (IPR012913)
707	Os01t0276800-03	Hypothetical conserved gene.	chr01	9704245	9708630	-
708	Os01t0276800-02	Similar to predicted protein.	chr01	9708349	9709615	-	Molecular Function: protein binding (GO:0005515)	Low-density lipoprotein (LDL) receptor class A repeat (IPR002172)
709	Os01t0276900-01	Conserved hypothetical protein.	chr01	9711631	9712419	-
710	Os01t0277100-01	Hypothetical protein.	chr01	9727698	9728244	+
711	Os01t0277500-01	Dof (DNA binding with one finger) transcription factor, C2-C2 zinc finger transcription factor, Regulation of flowering time	chr01	9733832	9738224	+	Biological Process: regulation of transcription, DNA-templated (GO:0006355), Molecular Function: DNA binding (GO:0003677)	Zinc finger, Dof-type (IPR003851)
712	Os01t0277600-00	Similar to aminophospholipid ATPase.	chr01	9738449	9744876	-	Biological Process: ATP biosynthetic process (GO:0006754), Biological Process: cation transport (GO:0006812), Biological Process: phospholipid transport (GO:0015914), Cellular Component: membrane (GO:0016020), Cellular Component: integral to membrane (GO:0016021), Molecular Function: nucleotide binding (GO:0000166), Molecular Function: magnesium ion binding (GO:0000287), Molecular Function: phosp…	ATPase, P-type, K/Mg/Cd/Cu/Zn/Na/Ca/Na/H-transporter (IPR001757), ATPase, P-type cation exchange, alpha subunit (IPR006069), ATPase, P-type, phospholipid-translocating, flippase (IPR006539), ATPase, P-type, ATPase-associated domain (IPR008250), ATPase, P-type phosphorylation site (IPR018303), HAD-like domain (IPR023214), ATPase, P-type, cytoplasmic domain N (IPR023299), ATPase, P-type, cytoplasmi…
713	Os01t0277700-01	Similar to Glycosyl hydrolases family 17 protein.	chr01	9750124	9753739	+
714	Os01t0278000-00	VQ domain containing protein.	chr01	9770018	9771047	-		VQ (IPR008889)
715	Os01t0278050-00	Hypothetical conserved gene.	chr01	9787093	9787848	+
716	Os01t0278100-01	Conserved hypothetical protein.	chr01	9788633	9789771	-
717	Os01t0278200-01	Similar to Ran-binding protein 17.	chr01	9793959	9796133	-
718	Os01t0278466-00	Non-protein coding transcript.	chr01	9809349	9809555	-
719	Os01t0278600-01	PDZ/DHR/GLGF domain containing protein.	chr01	9816821	9822750	+	Molecular Function: catalytic activity (GO:0003824), Molecular Function: protein binding (GO:0005515)	PDZ/DHR/GLGF (IPR001478), Peptidase cysteine/serine, trypsin-like (IPR009003)
720	Os01t0278600-02	PDZ/DHR/GLGF domain containing protein.	chr01	9816828	9822736	+	Molecular Function: catalytic activity (GO:0003824), Molecular Function: protein binding (GO:0005515)	PDZ/DHR/GLGF (IPR001478), Peptidase cysteine/serine, trypsin-like (IPR009003)
721	Os01t0278900-01	Similar to 50S ribosomal protein L40.	chr01	9859354	9860677	+
722	Os01t0278950-00	Similar to predicted protein.	chr01	9863216	9866617	+	Biological Process: proteolysis (GO:0006508), Biological Process: negative regulation of catalytic activity (GO:0043086), Molecular Function: serine-type endopeptidase activity (GO:0004252), Molecular Function: identical protein binding (GO:0042802)	Peptidase S8/S53, subtilisin/kexin/sedolisin (IPR000209), Protease-associated domain, PA (IPR003137), Proteinase inhibitor I9, subtilisin propeptide (IPR010259), Peptidase S8, subtilisin-related (IPR015500), Peptidase S8, subtilisin, Ser-active site (IPR023828)
723	Os01t0278975-00	Hypothetical protein.	chr01	9863798	9866492	-
724	Os01t0279000-01	Zinc finger, DHHC-type domain containing protein.	chr01	9866730	9870864	+	Molecular Function: zinc ion binding (GO:0008270)	Zinc finger, DHHC-type, palmitoyltransferase (IPR001594)
725	Os01t0279100-01	Subunit of magnesium-protoporphyrin IX monomethyl ester cyclase (EC:1.14.13.81), Core component of FLU-YGL8-LCAA-POR complex, Chlorophyll biosynthesis, Chloroplast development	chr01	9874379	9876678	+	Biological Process: photosynthesis (GO:0015979), Biological Process: chlorophyll biosynthetic process (GO:0015995), Biological Process: oxidation-reduction process (GO:0055114), Molecular Function: oxidoreductase activity (GO:0016491), Molecular Function: metal ion binding (GO:0046872), Molecular Function: magnesium-protoporphyrin IX monomethyl ester (oxidative) cyclase activity (GO:0048529)	Magnesium-protoporphyrin IX monomethyl ester [oxidative] cyclase (IPR008434), Ferritin-like superfamily (IPR009078), Ferritin-related (IPR012347), Rubrerythrin (IPR003251)
726	Os01t0279100-02	Similar to Magnesium-protoporphyrin ix monomethyl ester cyclase (Fragment).	chr01	9875693	9876532	+
727	Os01t0279200-01	Similar to COP9 signalosome complex subunit 2.	chr01	9878384	9883106	+	Molecular Function: binding (GO:0005488)	Tetratricopeptide-like helical (IPR011990)
728	Os01t0279200-02	Similar to COP9 signalosome complex subunit 2 (Signalosome subunit 2) (FUSCA protein 12) (FUSCA12).	chr01	9878413	9885462	+	Molecular Function: binding (GO:0005488), Molecular Function: protein binding (GO:0005515)	Proteasome component (PCI) domain (IPR000717), Tetratricopeptide-like helical (IPR011990), Winged helix-turn-helix transcription repressor DNA-binding (IPR011991), PCI/PINT associated module (IPR013143)
729	Os01t0279200-03	Similar to COP9 signalosome complex subunit 2.	chr01	9884284	9885517	+	Molecular Function: protein binding (GO:0005515)	Proteasome component (PCI) domain (IPR000717), Winged helix-turn-helix transcription repressor DNA-binding (IPR011991)
730	Os01t0279300-01	Similar to Calmodulin 1 (Fragment).	chr01	9887657	9889123	+	Molecular Function: calcium ion binding (GO:0005509)	Calcium-binding EF-hand (IPR002048), EF-hand-like domain (IPR011992), EF-Hand 1, calcium-binding site (IPR018247), EF-hand (IPR018248), EF-HAND 2 (IPR018249)
731	Os01t0279400-01	Major facilitator superfamily antiporter.	chr01	9889550	9902737	-	Biological Process: transmembrane transport (GO:0055085), Cellular Component: integral to membrane (GO:0016021)	Major facilitator superfamily (IPR011701), Major facilitator superfamily domain, general substrate transporter (IPR016196), Major facilitator superfamily domain (IPR020846)
732	Os01t0279500-01	Hypothetical gene.	chr01	9892418	9896053	+
733	Os01t0279700-01	Major facilitator superfamily protein.	chr01	9913390	9917265	+	Biological Process: transmembrane transport (GO:0055085), Cellular Component: integral to membrane (GO:0016021)	Major facilitator superfamily (IPR011701), Major facilitator superfamily domain, general substrate transporter (IPR016196), Major facilitator superfamily domain (IPR020846)
734	Os01t0279700-02	Major facilitator superfamily protein.	chr01	9913527	9917318	+	Biological Process: transmembrane transport (GO:0055085), Cellular Component: integral to membrane (GO:0016021)	Major facilitator superfamily (IPR011701), Major facilitator superfamily domain, general substrate transporter (IPR016196), Major facilitator superfamily domain (IPR020846)
735	Os01t0279700-03	Non-protein coding transcript.	chr01	9916859	9917265	+
736	Os01t0279800-01	Similar to LRR protein.	chr01	9917593	9921565	-	Molecular Function: protein binding (GO:0005515)	Leucine-rich repeat (IPR001611), Leucine-rich repeat-containing N-terminal, type 2 (IPR013210)
737	Os01t0279800-02	Similar to BRASSINOSTEROID INSENSITIVE 1-associated receptor kinase 1.	chr01	9920557	9921565	-		Leucine-rich repeat-containing N-terminal, type 2 (IPR013210)
738	Os01t0279900-01	TGA transcription factor, bZIP transcription factor, Defense response, Multiple abiotic stress tolerance	chr01	9928971	9935981	+	Biological Process: transcription, DNA-templated (GO:0006351), Biological Process: regulation of transcription, DNA-templated (GO:0006355), Molecular Function: DNA-binding transcription factor activity (GO:0003700), Molecular Function: sequence-specific DNA binding (GO:0043565)	Basic-leucine zipper domain (IPR004827), Transcription factor TGA like domain (IPR025422)
739	Os01t0280000-01	Similar to Histone mRNA exonuclease 1.	chr01	9936850	9947933	-	Cellular Component: intracellular (GO:0005622), Molecular Function: nucleic acid binding (GO:0003676), Molecular Function: exonuclease activity (GO:0004527), Molecular Function: zinc ion binding (GO:0008270)	Exonuclease (IPR006055), Zinc finger, GRF-type (IPR010666), Ribonuclease H-like (IPR012337), Exonuclease, RNase T/DNA polymerase III (IPR013520)
740	Os01t0280000-02	Similar to Histone mRNA exonuclease 1.	chr01	9936900	9946480	-	Cellular Component: intracellular (GO:0005622), Molecular Function: nucleic acid binding (GO:0003676), Molecular Function: exonuclease activity (GO:0004527), Molecular Function: zinc ion binding (GO:0008270)	Exonuclease (IPR006055), Zinc finger, GRF-type (IPR010666), Ribonuclease H-like (IPR012337), Exonuclease, RNase T/DNA polymerase III (IPR013520)
741	Os01t0280200-01	IQ motif, EF-hand binding site domain containing protein.	chr01	9954154	9955696	+	Molecular Function: protein binding (GO:0005515)	IQ motif, EF-hand binding site (IPR000048)
742	Os01t0280400-00	DNA-binding protein.	chr01	9962807	9966715	+	Molecular Function: binding (GO:0005488)	Pentatricopeptide repeat (IPR002885), Tetratricopeptide-like helical (IPR011990)
743	Os01t0280500-01	Similar to Eukaryotic translation initiation factor 6 (eIF-6) (B4 integrin interactor) (CAB) (p27(BBP)) (B(2)GCN homolog).	chr01	9967185	9969073	-	Biological Process: mature ribosome assembly (GO:0042256), Molecular Function: ribosome binding (GO:0043022)	Translation initiation factor IF6 (IPR002769)
744	Os01t0280600-01	Conserved hypothetical protein.	chr01	9969576	9970900	-
745	Os01t0281000-01	Cyclin-like F-box domain containing protein.	chr01	10003952	10007742	+	Molecular Function: protein binding (GO:0005515)	F-box domain, cyclin-like (IPR001810), F-box domain, Skp2-like (IPR022364)
746	Os01t0281050-00	Hypothetical protein.	chr01	10004574	10005089	-
747	Os01t0281100-01	Conserved hypothetical protein.	chr01	10008075	10011595	-
748	Os01t0281200-01	Similar to Type B-like cyclin (Fragment).	chr01	10011875	10015468	-	Biological Process: regulation of cyclin-dependent protein kinase activity (GO:0000079), Biological Process: regulation of cell cycle (GO:0051726), Cellular Component: nucleus (GO:0005634), Molecular Function: protein kinase binding (GO:0019901)	Cyclin, C-terminal (IPR004367), Cyclin, N-terminal (IPR006671), Cyclin-like (IPR013763), Cyclin A/B/D/E (IPR014400)
749	Os01t0281250-00	Hypothetical protein.	chr01	10012164	10014100	+
750	Os01t0281301-00	Protein of unknown function DUF1645 domain containing protein.	chr01	10019633	10020376	-		Protein of unknown function DUF1645 (IPR012442)
751	Os01t0281400-00	Coatomer, beta subunit domain containing protein.	chr01	10021423	10027120	-	Biological Process: intracellular protein transport (GO:0006886), Biological Process: vesicle-mediated transport (GO:0016192), Cellular Component: cytoplasm (GO:0005737), Cellular Component: membrane coat (GO:0030117), Cellular Component: COPI vesicle coat (GO:0030126), Molecular Function: structural molecule activity (GO:0005198), Molecular Function: binding (GO:0005488)	Clathrin/coatomer adaptor, adaptin-like, N-terminal (IPR002553), Coatomer, beta subunit, C-terminal (IPR011710), Armadillo-like helical (IPR011989), Armadillo-type fold (IPR016024), Coatomer, beta subunit (IPR016460)
752	Os01t0281600-01	Cupredoxin domain containing protein.	chr01	10048273	10050309	-	Molecular Function: copper ion binding (GO:0005507), Molecular Function: electron carrier activity (GO:0009055)	Plastocyanin-like (IPR003245), Cupredoxin (IPR008972)
753	Os01t0282251-01	Similar to CAA30375.1 protein.	chr01	10074477	10079135	+
754	Os01t0282800-02	Similar to Tubulin beta-5 chain (Beta-5 tubulin).	chr01	10099352	10102948	-
755	Os01t0282866-00	Hypothetical protein.	chr01	10099705	10102286	+
756	Os01t0283000-01	Conserved hypothetical protein.	chr01	10113431	10119022	-
757	Os01t0283000-02	Conserved hypothetical protein.	chr01	10113931	10118998	-
758	Os01t0283100-01	Similar to Ferripyochelin-binding protein-like.	chr01	10119242	10123678	+	Molecular Function: transferase activity (GO:0016740)	Bacterial transferase hexapeptide repeat (IPR001451), Trimeric LpxA-like (IPR011004)
759	Os01t0283100-02	Similar to Ferripyochelin-binding protein-like.	chr01	10119294	10123678	+	Molecular Function: transferase activity (GO:0016740)	Bacterial transferase hexapeptide repeat (IPR001451), Trimeric LpxA-like (IPR011004)
760	Os01t0283300-01	Conserved hypothetical protein.	chr01	10134096	10135327	+
761	Os01t0283300-02	Conserved hypothetical protein.	chr01	10134221	10135325	+
762	Os01t0283400-01	Conserved hypothetical protein.	chr01	10136482	10137054	+
763	Os01t0283500-02	Peptidase S54, rhomboid domain containing protein.	chr01	10137726	10140159	-	Cellular Component: intracellular (GO:0005622), Cellular Component: integral to membrane (GO:0016021), Molecular Function: serine-type endopeptidase activity (GO:0004252), Molecular Function: zinc ion binding (GO:0008270)	Zinc finger, RanBP2-type (IPR001876), Peptidase S54, rhomboid domain (IPR022764)
764	Os01t0283500-01	Similar to predicted protein.	chr01	10139192	10140166	-
765	Os01t0283600-00	Similar to Cinnamoyl CoA reductase.	chr01	10144374	10146312	+	Biological Process: cellular metabolic process (GO:0044237), Molecular Function: nucleotide binding (GO:0000166), Molecular Function: catalytic activity (GO:0003824), Molecular Function: coenzyme binding (GO:0050662)	NAD-dependent epimerase/dehydratase (IPR001509), NAD(P)-binding domain (IPR016040)
766	Os01t0283700-01	Similar to Cinnamoyl-CoA reductase (EC 1.2.1.44).	chr01	10148777	10152280	+	Biological Process: cellular metabolic process (GO:0044237), Molecular Function: nucleotide binding (GO:0000166), Molecular Function: catalytic activity (GO:0003824), Molecular Function: coenzyme binding (GO:0050662)	NAD-dependent epimerase/dehydratase (IPR001509), NAD(P)-binding domain (IPR016040)
767	Os01t0284300-00	Protein kinase, catalytic domain domain containing protein.	chr01	10164402	10165541	+	Biological Process: protein phosphorylation (GO:0006468), Molecular Function: protein kinase activity (GO:0004672), Molecular Function: ATP binding (GO:0005524), Molecular Function: transferase activity, transferring phosphorus-containing groups (GO:0016772)	Protein kinase, catalytic domain (IPR000719), Protein kinase-like domain (IPR011009), Serine/threonine-protein kinase-like domain (IPR017442)
768	Os01t0284500-01	Similar to Nectarin 1 precursor (EC 1.15.1.1) (Superoxide dismutase [Mn]).	chr01	10167946	10168997	-	Cellular Component: apoplast (GO:0048046), Molecular Function: manganese ion binding (GO:0030145), Molecular Function: nutrient reservoir activity (GO:0045735)	Germin (IPR001929), Cupin 1 (IPR006045), Cupin, RmlC-type (IPR011051), RmlC-like jelly roll fold (IPR014710), Germin, manganese binding site (IPR019780)
769	Os01t0284700-01	Similar to Peptidyl-prolyl cis-trans isomerase.	chr01	10193658	10196611	+	Biological Process: protein folding (GO:0006457), Molecular Function: peptidyl-prolyl cis-trans isomerase activity (GO:0003755)	Peptidyl-prolyl cis-trans isomerase, cyclophilin-type (IPR002130), Cyclophilin-like (IPR015891), Peptidyl-prolyl cis-trans isomerase, cyclophilin-type, conserved site (IPR020892)
770	Os01t0284900-01	Conserved hypothetical protein.	chr01	10200477	10203472	-
771	Os01t0285200-01	Conserved hypothetical protein.	chr01	10214072	10217665	+
772	Os01t0285300-01	Myb transcription factor domain containing protein.	chr01	10217782	10219691	-	Biological Process: regulation of transcription, DNA-dependent (GO:0006355), Molecular Function: DNA binding (GO:0003677), Molecular Function: protein binding (GO:0005515)	SANT domain, DNA binding (IPR001005), Homeodomain-like (IPR009057), Homeodomain-related (IPR012287), Myb, DNA-binding (IPR014778), Myb transcription factor (IPR015495), Transcription regulator HTH, Myb-type, DNA-binding (IPR017930), Protein of unknown function DUF3651, TMEM131 (IPR022113)
773	Os01t0286000-01	Snf7 family protein.	chr01	10264587	10267953	+	Biological Process: protein transport (GO:0015031)	Snf7 (IPR005024)
774	Os01t0286100-01	Phytochrome-interacting factor-like protein, Basic helix-loop-helix factor, Repression of seedling growth in the dark	chr01	10271157	10274304	-	Molecular Function: protein dimerization activity (GO:0046983)	Myc-type, basic helix-loop-helix (bHLH) domain (IPR011598)
775	Os01t0286200-01	Hypothetical protein.	chr01	10272708	10275638	+
776	Os01t0286500-00	Conserved hypothetical protein.	chr01	10289186	10289952	-
777	Os01t0286550-00	Hypothetical gene.	chr01	10291818	10292251	-
778	Os01t0286600-01	Similar to Plastidal protoporphyrinogen oxidase.	chr01	10291889	10295449	+	Biological Process: porphyrin-containing compound biosynthetic process (GO:0006779), Biological Process: oxidation-reduction process (GO:0055114), Molecular Function: nucleotide binding (GO:0000166), Molecular Function: oxygen-dependent protoporphyrinogen oxidase activity (GO:0004729), Molecular Function: oxidoreductase activity (GO:0016491)	Amine oxidase (IPR002937), Protoporphyrinogen oxidase (IPR004572), NAD(P)-binding domain (IPR016040)
779	Os01t0286900-01	Similar to Auxin-responsive protein IAA31 (Indoleacetic acid-induced protein 31).	chr01	10312342	10314826	+	Biological Process: regulation of transcription, DNA-dependent (GO:0006355), Cellular Component: nucleus (GO:0005634), Molecular Function: protein dimerization activity (GO:0046983)	AUX/IAA protein (IPR003311), Aux/IAA-ARF-dimerisation (IPR011525)
780	Os01t0287400-01	Similar to Hydrophobic protein LTI6A (Low temperature-induced protein 6A).	chr01	10333794	10334375	+
781	Os01t0287600-01	Similar to Chitinase 10.	chr01	10342026	10343570	-	Biological Process: carbohydrate metabolic process (GO:0005975), Biological Process: chitin catabolic process (GO:0006032), Biological Process: cell wall macromolecule catabolic process (GO:0016998), Molecular Function: chitinase activity (GO:0004568)	Glycoside hydrolase, family 19, catalytic (IPR000726), Glycoside hydrolase, family 19 (IPR016283), Lysozyme-like domain (IPR023346)
782	Os01t0287700-01	Hypothetical conserved gene.	chr01	10346287	10349999	-
783	Os01t0287900-00	Hypothetical protein.	chr01	10366413	10366924	-
784	Os01t0288200-01	Conserved hypothetical protein.	chr01	10369936	10370578	-
785	Os01t0288700-01	Hypothetical gene.	chr01	10398599	10399256	+
786	Os01t0288800-01	Conserved hypothetical protein.	chr01	10399289	10400347	-
787	Os01t0289100-00	Conserved hypothetical protein.	chr01	10432248	10432766	-
788	Os01t0289600-00	Similar to WRKY transcription factor 28.	chr01	10471169	10478800	+	Biological Process: regulation of transcription, DNA-dependent (GO:0006355), Molecular Function: sequence-specific DNA binding transcription factor activity (GO:0003700), Molecular Function: sequence-specific DNA binding (GO:0043565)	DNA-binding WRKY (IPR003657)
789	Os01t0289732-01	Similar to WRKY transcription factor 6-like (WRKY transcription factor 9).	chr01	10477926	10478798	-
790	Os01t0289750-00	Non-protein coding transcript.	chr01	10487870	10488107	-
791	Os01t0289900-00	Transferase domain containing protein.	chr01	10488943	10490994	-	Molecular Function: transferase activity, transferring acyl groups other than amino-acyl groups (GO:0016747)	Transferase (IPR003480), Chloramphenicol acetyltransferase-like domain (IPR023213)
792	Os01t0289950-01	Conserved hypothetical protein.	chr01	10489015	10491186	+
793	Os01t0290000-01	Similar to Cyprosin precursor (EC 3.4.23.-) (Fragment).	chr01	10492039	10495682	-	Biological Process: proteolysis (GO:0006508), Biological Process: lipid metabolic process (GO:0006629), Molecular Function: aspartic-type endopeptidase activity (GO:0004190)	Peptidase A1 (IPR001461), Peptidase aspartic, active site (IPR001969), Saposin-like type B, 1 (IPR007856), Saposin-like type B, 2 (IPR008138), Saposin B (IPR008139), Peptidase aspartic, catalytic (IPR009007), Saposin-like (IPR011001), Peptidase aspartic (IPR021109)
794	Os01t0290000-04	Similar to retrotransposon protein SINE subclass.	chr01	10492062	10493925	-	Biological Process: proteolysis (GO:0006508), Biological Process: lipid metabolic process (GO:0006629), Molecular Function: aspartic-type endopeptidase activity (GO:0004190)	Peptidase A1 (IPR001461), Saposin-like type B, 1 (IPR007856), Saposin-like type B, 2 (IPR008138), Saposin B (IPR008139), Peptidase aspartic, catalytic (IPR009007), Saposin-like (IPR011001), Peptidase aspartic (IPR021109)
795	Os01t0290000-02	Similar to Cyprosin precursor (EC 3.4.23.-) (Fragment).	chr01	10492192	10495628	-	Biological Process: proteolysis (GO:0006508), Biological Process: lipid metabolic process (GO:0006629), Molecular Function: aspartic-type endopeptidase activity (GO:0004190)	Peptidase A1 (IPR001461), Peptidase aspartic, active site (IPR001969), Saposin-like type B, 1 (IPR007856), Saposin-like type B, 2 (IPR008138), Saposin B (IPR008139), Peptidase aspartic, catalytic (IPR009007), Saposin-like (IPR011001), Peptidase aspartic (IPR021109)
796	Os01t0290000-03	Similar to Cyprosin precursor (EC 3.4.23.-) (Fragment).	chr01	10492240	10495601	-	Biological Process: proteolysis (GO:0006508), Biological Process: lipid metabolic process (GO:0006629), Molecular Function: aspartic-type endopeptidase activity (GO:0004190)	Peptidase A1 (IPR001461), Peptidase aspartic, active site (IPR001969), Saposin-like type B, 1 (IPR007856), Saposin-like type B, 2 (IPR008138), Saposin B (IPR008139), Peptidase aspartic, catalytic (IPR009007), Saposin-like (IPR011001), Peptidase aspartic (IPR021109)
797	Os01t0290100-01	Pyridoxal phosphate-dependent transferase, major region, subdomain 1 domain containing protein.	chr01	10496869	10500943	-	Biological Process: metabolic process (GO:0008152), Molecular Function: catalytic activity (GO:0003824), Molecular Function: pyridoxal phosphate binding (GO:0030170)	Aminotransferase, class V/Cysteine desulfurase (IPR000192), Pyridoxal phosphate-dependent transferase, major region, subdomain 1 (IPR015421), Pyridoxal phosphate-dependent transferase, major domain (IPR015424)
798	Os01t0290600-00	Similar to isopenicillin N epimerase.	chr01	10509008	10510496	+	Biological Process: metabolic process (GO:0008152), Molecular Function: catalytic activity (GO:0003824), Molecular Function: pyridoxal phosphate binding (GO:0030170)	Aminotransferase, class V/Cysteine desulfurase (IPR000192), Pyridoxal phosphate-dependent transferase, major region, subdomain 1 (IPR015421), Pyridoxal phosphate-dependent transferase, major domain (IPR015424)
799	Os01t0290650-00	Non-protein coding transcript.	chr01	10514370	10516248	+
800	Os01t0290700-01	Similar to CjMDR1.	chr01	10515442	10516270	-	Molecular Function: ATP binding (GO:0005524), Molecular Function: ATPase activity (GO:0016887)	ABC transporter-like (IPR003439)
801	Os01t0290800-01	Hypothetical protein.	chr01	10516472	10518597	+
802	Os01t0290901-00	Non-protein coding transcript.	chr01	10536286	10536571	-
803	Os01t0291500-02	Transferase family protein.	chr01	10561330	10565221	-	Molecular Function: transferase activity, transferring acyl groups other than amino-acyl groups (GO:0016747)	Transferase (IPR003480), Chloramphenicol acetyltransferase-like domain (IPR023213)
804	Os01t0291500-01	Transferase family protein.	chr01	10561340	10565325	-	Molecular Function: transferase activity, transferring acyl groups other than amino-acyl groups (GO:0016747)	Transferase (IPR003480), Chloramphenicol acetyltransferase-like domain (IPR023213)
805	Os01t0291733-00	Hypothetical protein.	chr01	10561594	10565100	+
806	Os01t0292200-01	Serine/threonine protein kinase domain containing protein.	chr01	10622951	10627532	+	Biological Process: protein phosphorylation (GO:0006468), Biological Process: signal transduction (GO:0007165), Molecular Function: protein kinase activity (GO:0004672), Molecular Function: protein serine/threonine kinase activity (GO:0004674), Molecular Function: protein tyrosine kinase activity (GO:0004713), Molecular Function: ATP binding (GO:0005524), Molecular Function: transferase activity,…	Protein kinase, catalytic domain (IPR000719), Serine/threonine-protein kinase, catalytic domain (IPR002290), NAF domain (IPR004041), Serine/threonine-protein kinase, active site (IPR008271), Protein kinase-like domain (IPR011009), Protein kinase, ATP binding site (IPR017441), Serine/threonine-protein kinase-like domain (IPR017442), NAF/FISL domain (IPR018451), Tyrosine-protein kinase, catalytic d…
807	Os01t0292250-00	Non-protein coding transcript.	chr01	10623102	10626765	-
808	Os01t0292200-02	Similar to CBL-interacting protein kinase 1.	chr01	10625861	10627489	+	Biological Process: protein phosphorylation (GO:0006468), Biological Process: signal transduction (GO:0007165), Molecular Function: protein kinase activity (GO:0004672), Molecular Function: protein serine/threonine kinase activity (GO:0004674), Molecular Function: ATP binding (GO:0005524), Molecular Function: transferase activity, transferring phosphorus-containing groups (GO:0016772)	Protein kinase, catalytic domain (IPR000719), Kinase-associated KA1 (IPR001772), NAF domain (IPR004041), Protein kinase-like domain (IPR011009), Serine/threonine-protein kinase-like domain (IPR017442), NAF/FISL domain (IPR018451)
809	Os01t0292200-03	Similar to CBL-interacting protein kinase 1.	chr01	10627018	10627489	+	Biological Process: protein phosphorylation (GO:0006468), Molecular Function: protein serine/threonine kinase activity (GO:0004674), Molecular Function: ATP binding (GO:0005524)	Kinase-associated KA1 (IPR001772)
810	Os01t0292700-01	Intermediate filament, Cytoskeleton protein, Tolerance to salinity and heat stress	chr01	10643287	10644848	+
811	Os01t0292900-01	Similar to Squamosa-promoter binding-like protein 2.	chr01	10650597	10656659	+	Cellular Component: nucleus (GO:0005634), Molecular Function: DNA binding (GO:0003677)	Transcription factor, SBP-box (IPR004333), Ankyrin repeat-containing domain (IPR020683)
812	Os01t0292900-02	Similar to Squamosa-promoter binding-like protein 2.	chr01	10650742	10656755	+	Cellular Component: nucleus (GO:0005634), Molecular Function: DNA binding (GO:0003677)	Transcription factor, SBP-box (IPR004333), Ankyrin repeat-containing domain (IPR020683)
813	Os01t0293000-01	S-adenosyl-l-methionine synthetase, Histone H3K4me3 and DNA methylation, Regulation of gene expression related to flowering	chr01	10657543	10660137	-	Biological Process: S-adenosylmethionine biosynthetic process (GO:0006556), Molecular Function: methionine adenosyltransferase activity (GO:0004478), Molecular Function: ATP binding (GO:0005524)	S-adenosylmethionine synthetase superfamily (IPR022636), S-adenosylmethionine synthetase (IPR002133), S-adenosylmethionine synthetase, N-terminal (IPR022628), S-adenosylmethionine synthetase, central domain (IPR022629), S-adenosylmethionine synthetase, C-terminal (IPR022630), S-adenosylmethionine synthetase, conserved site (IPR022631)
814	Os01t0293100-01	bHLH transcription factor, Control of anther cell differentiation, Pollen development	chr01	10664792	10666903	-	Molecular Function: protein dimerization activity (GO:0046983)	Myc-type, basic helix-loop-helix (bHLH) domain (IPR011598)
815	Os01t0293200-01	Similar to predicted protein.	chr01	10675167	10679826	+		Plant organelle RNA recognition domain (IPR021099)
816	Os01t0293501-00	Hypothetical protein.	chr01	10691672	10692073	+
817	Os01t0293800-00	Hypothetical protein.	chr01	10696304	10701348	+
818	Os01t0293900-00	Similar to peroxidase 1.	chr01	10701626	10703130	-	Biological Process: response to oxidative stress (GO:0006979), Biological Process: oxidation-reduction process (GO:0055114), Molecular Function: peroxidase activity (GO:0004601), Molecular Function: heme binding (GO:0020037)	Haem peroxidase, plant/fungal/bacterial (IPR002016), Haem peroxidase (IPR010255), Peroxidase, active site (IPR019794)
819	Os01t0294500-00	Similar to Class III peroxidase 9.	chr01	10720396	10721623	-	Biological Process: response to oxidative stress (GO:0006979), Biological Process: oxidation-reduction process (GO:0055114), Molecular Function: peroxidase activity (GO:0004601), Molecular Function: heme binding (GO:0020037)	Plant peroxidase (IPR000823), Haem peroxidase, plant/fungal/bacterial (IPR002016), Haem peroxidase (IPR010255), Peroxidases heam-ligand binding site (IPR019793), Peroxidase, active site (IPR019794)
820	Os01t0294700-01	Haem peroxidase, plant/fungal/bacterial family protein.	chr01	10748692	10750233	-	Biological Process: response to oxidative stress (GO:0006979), Biological Process: oxidation-reduction process (GO:0055114), Molecular Function: peroxidase activity (GO:0004601), Molecular Function: heme binding (GO:0020037)	Plant peroxidase (IPR000823), Haem peroxidase, plant/fungal/bacterial (IPR002016), Haem peroxidase (IPR010255), Peroxidase, active site (IPR019794)
821	Os01t0295600-01	Hypothetical conserved gene.	chr01	10802151	10804527	-
822	Os01t0295700-01	Similar to Protein phosphatase-2C.	chr01	10805527	10808077	-	Biological Process: protein dephosphorylation (GO:0006470), Cellular Component: protein serine/threonine phosphatase complex (GO:0008287), Molecular Function: catalytic activity (GO:0003824), Molecular Function: protein serine/threonine phosphatase activity (GO:0004722)	Protein phosphatase 2C, manganese/magnesium aspartate binding site (IPR000222), Protein phosphatase 2C-like (IPR001932), Protein phosphatase 2C (IPR015655)
823	Os01t0295900-01	Similar to cDNA clone:J023064I01, full insert sequence.	chr01	10814139	10818530	-	Biological Process: proteolysis (GO:0006508), Molecular Function: metalloendopeptidase activity (GO:0004222)	Peptidase M22, glycoprotease (IPR000905), Peptidase M22, glycoprotease, subgroup (IPR017861)
824	Os01t0296000-01	Protein kinase, core domain containing protein.	chr01	10819457	10822413	-	Biological Process: protein phosphorylation (GO:0006468), Molecular Function: protein kinase activity (GO:0004672), Molecular Function: protein tyrosine kinase activity (GO:0004713), Molecular Function: ATP binding (GO:0005524), Molecular Function: transferase activity, transferring phosphorus-containing groups (GO:0016772)	Protein kinase, catalytic domain (IPR000719), Tyrosine-protein kinase, active site (IPR008266), Protein kinase-like domain (IPR011009), Serine/threonine-protein kinase-like domain (IPR017442)
825	Os01t0296100-01	Similar to Shaggy-related protein kinase alpha (EC 2.7.1.-) (ASK-alpha).	chr01	10822587	10827149	+	Biological Process: protein phosphorylation (GO:0006468), Molecular Function: protein kinase activity (GO:0004672), Molecular Function: protein serine/threonine kinase activity (GO:0004674), Molecular Function: ATP binding (GO:0005524), Molecular Function: transferase activity, transferring phosphorus-containing groups (GO:0016772)	Protein kinase, catalytic domain (IPR000719), Serine/threonine-protein kinase, catalytic domain (IPR002290), Serine/threonine-protein kinase, active site (IPR008271), Protein kinase-like domain (IPR011009), Protein kinase, ATP binding site (IPR017441), Serine/threonine-protein kinase-like domain (IPR017442)
826	Os01t0296100-02	Similar to Glycogen synthase kinase.	chr01	10822587	10827093	+
827	Os01t0296100-03	Similar to Glycogen synthase kinase.	chr01	10822596	10827151	+
828	Os01t0296133-00	Non-protein coding transcript.	chr01	10824769	10826165	-
829	Os01t0296166-00	Hypothetical protein.	chr01	10830074	10832018	-
830	Os01t0296200-00	Similar to polygalacturonase.	chr01	10830393	10831757	+	Biological Process: carbohydrate metabolic process (GO:0005975), Molecular Function: polygalacturonase activity (GO:0004650)	Glycoside hydrolase, family 28 (IPR000743), Parallel beta-helix repeat (IPR006626), Pectin lyase fold/virulence factor (IPR011050), Pectin lyase fold (IPR012334)
831	Os01t0296450-00	Hypothetical protein.	chr01	10871540	10873947	-
832	Os01t0296700-01	Glycoside hydrolase, family 3, N-terminal domain containing protein.	chr01	10872358	10874262	+	Biological Process: carbohydrate metabolic process (GO:0005975), Molecular Function: hydrolase activity, hydrolyzing O-glycosyl compounds (GO:0004553)	Glycoside hydrolase, family 3, N-terminal (IPR001764), Glycoside hydrolase, family 3, C-terminal (IPR002772), Glycoside hydrolase, superfamily (IPR017853)
833	Os01t0296900-01	Hypothetical conserved gene.	chr01	10877446	10878567	+
834	Os01t0297200-01	ATPase, AAA-type, core domain containing protein.	chr01	10891810	10893684	+	Molecular Function: nucleotide binding (GO:0000166), Molecular Function: ATP binding (GO:0005524), Molecular Function: nucleoside-triphosphatase activity (GO:0017111)	ATPase, AAA+ type, core (IPR003593), ATPase, AAA-type, core (IPR003959), ATPase, AAA-type, conserved site (IPR003960)
835	Os01t0297700-01	Protein of unknown function DUF6, transmembrane domain containing protein.	chr01	10911297	10914638	+	Cellular Component: membrane (GO:0016020)	Drug/metabolite transporter (IPR000620)
836	Os01t0297950-00	Hypothetical protein.	chr01	10911475	10914251	-
837	Os01t0298301-01	Hypothetical conserved gene.	chr01	10932480	10933544	-
838	Os01t0298400-01	Myb transcription factor domain containing protein.	chr01	10934895	10935992	+	Biological Process: regulation of transcription, DNA-dependent (GO:0006355), Molecular Function: DNA binding (GO:0003677), Molecular Function: protein binding (GO:0005515)	SANT domain, DNA binding (IPR001005), Homeodomain-like (IPR009057), Homeodomain-related (IPR012287), Myb, DNA-binding (IPR014778), Myb transcription factor (IPR015495), Transcription regulator HTH, Myb-type, DNA-binding (IPR017930)
839	Os01t0298500-00	Conserved hypothetical protein.	chr01	10942552	10945642	-
840	Os01t0299100-00	Conserved hypothetical protein.	chr01	10960528	10961310	-
841	Os01t0299150-00	Pentatricopeptide repeat domain containing protein.	chr01	10965000	10965587	+		Pentatricopeptide repeat (IPR002885)
842	Os01t0299200-00	Pentatricopeptide repeat domain containing protein.	chr01	10965767	10966999	+		Pentatricopeptide repeat (IPR002885)
843	Os01t0299300-00	Hypothetical conserved gene.	chr01	10969328	10973346	-	Biological Process: metabolic process (GO:0008152), Molecular Function: transferase activity, transferring acyl groups (GO:0016746)	Phospholipid/glycerol acyltransferase (IPR002123)
844	Os01t0299400-01	Sterile alpha motif homology domain containing protein.	chr01	10977198	10979778	+		IGR protein motif (IPR019083)
845	Os01t0299500-01	Conserved hypothetical protein.	chr01	10980741	10983339	-
846	Os01t0299700-01	3'-5' exonuclease domain containing protein.	chr01	10986093	10986991	-	Biological Process: nucleobase-containing compound metabolic process (GO:0006139), Cellular Component: intracellular (GO:0005622), Molecular Function: nucleic acid binding (GO:0003676), Molecular Function: 3'-5' exonuclease activity (GO:0008408)	3&apos;-5&apos; exonuclease (IPR002562), Ribonuclease H-like (IPR012337)
847	Os01t0299801-00	Conserved hypothetical protein.	chr01	10986340	10986999	+
848	Os01t0300000-01	3'-5' exonuclease domain containing protein.	chr01	10990819	10991617	-	Biological Process: nucleobase-containing compound metabolic process (GO:0006139), Cellular Component: intracellular (GO:0005622), Molecular Function: nucleic acid binding (GO:0003676), Molecular Function: 3'-5' exonuclease activity (GO:0008408)	3'-5' exonuclease (IPR002562), Ribonuclease H-like (IPR012337)
849	Os01t0300200-01	Similar to ATP-citrate lyase subunit B.	chr01	10999316	11005978	-	Biological Process: metabolic process (GO:0008152), Biological Process: cellular carbohydrate metabolic process (GO:0044262), Molecular Function: nucleotide binding (GO:0000166), Molecular Function: catalytic activity (GO:0003824), Molecular Function: ATP citrate synthase activity (GO:0003878), Molecular Function: succinate-CoA ligase (ADP-forming) activity (GO:0004775), Molecular Function: trans…	Citrate synthase-like (IPR002020), Succinyl-CoA ligase, alpha subunit (IPR005810), ATP-citrate lyase/succinyl-CoA ligase (IPR005811), NAD(P)-binding domain (IPR016040), Succinyl-CoA synthetase-like (IPR016102), Citrate synthase-like, core (IPR016141), Citrate synthase-like, large alpha subdomain (IPR016142), Citrate synthase-like, small alpha subdomain (IPR016143), ATP-citrate lyase/succinyl-CoA …
850	Os01t0300200-02	Similar to ATP-citrate lyase subunit B.	chr01	10999407	11005946	-	Biological Process: metabolic process (GO:0008152), Biological Process: cellular carbohydrate metabolic process (GO:0044262), Molecular Function: nucleotide binding (GO:0000166), Molecular Function: catalytic activity (GO:0003824), Molecular Function: ATP citrate synthase activity (GO:0003878), Molecular Function: succinate-CoA ligase (ADP-forming) activity (GO:0004775), Molecular Function: trans…	Citrate synthase-like (IPR002020), Succinyl-CoA ligase, alpha subunit (IPR005810), ATP-citrate lyase/succinyl-CoA ligase (IPR005811), NAD(P)-binding domain (IPR016040), Succinyl-CoA synthetase-like (IPR016102), Citrate synthase-like, core (IPR016141), Citrate synthase-like, large alpha subdomain (IPR016142), Citrate synthase-like, small alpha subdomain (IPR016143), ATP-citrate lyase/succinyl-CoA …
851	Os01t0300200-03	Similar to ACLB-1 (ATP-citrate lyase B-1).	chr01	10999527	11003597	-	Biological Process: metabolic process (GO:0008152), Biological Process: cellular carbohydrate metabolic process (GO:0044262), Molecular Function: catalytic activity (GO:0003824), Molecular Function: ATP citrate synthase activity (GO:0003878), Molecular Function: succinate-CoA ligase (ADP-forming) activity (GO:0004775), Molecular Function: transferase activity, transferring acyl groups, acyl group…	Citrate synthase-like (IPR002020), Succinyl-CoA ligase, alpha subunit (IPR005810), ATP-citrate lyase/succinyl-CoA ligase (IPR005811), Succinyl-CoA synthetase-like (IPR016102), Citrate synthase-like, core (IPR016141), Citrate synthase-like, large alpha subdomain (IPR016142), Citrate synthase-like, small alpha subdomain (IPR016143), ATP-citrate lyase/succinyl-CoA ligase, active site (IPR017440), Su…
852	Os01t0300400-01	Hypothetical conserved gene.	chr01	11012295	11016215	+
853	Os01t0300600-01	Similar to carbohydrate binding.	chr01	11025448	11029186	-	Molecular Function: binding (GO:0005488), Molecular Function: carbohydrate binding (GO:0030246)	Collagen-binding surface protein Cna, B-type domain (IPR008970), Immunoglobulin-like fold (IPR013783), Carbohydrate-binding-like fold (IPR013784)
854	Os01t0300900-01	Galactose oxidase/kelch, beta-propeller domain containing protein.	chr01	11058878	11063860	+	Molecular Function: protein binding (GO:0005515)	Kelch repeat type 1 (IPR006652), Kelch repeat type 2 (IPR011498), Kelch-type beta propeller (IPR015915), Galactose oxidase, beta-propeller (IPR015916)
855	Os01t0300900-02	Hypothetical conserved gene.	chr01	11061248	11063872	+	Molecular Function: protein binding (GO:0005515)	Kelch repeat type 1 (IPR006652), Kelch-type beta propeller (IPR015915)
856	Os01t0301000-01	Pentatricopeptide repeat domain containing protein.	chr01	11065094	11068774	-	Molecular Function: binding (GO:0005488)	Pentatricopeptide repeat (IPR002885), Tetratricopeptide-like helical (IPR011990)
857	Os01t0301100-01	Conserved hypothetical protein.	chr01	11070897	11071960	+
858	Os01t0301300-01	Hypothetical protein.	chr01	11075123	11077640	+
859	Os01t0301500-01	Pentatricopeptide repeat domain containing protein.	chr01	11078206	11083482	-	Molecular Function: binding (GO:0005488)	Pentatricopeptide repeat (IPR002885), Tetratricopeptide-like helical (IPR011990)
860	Os01t0301700-01	Tetratricopeptide-like helical domain containing protein.	chr01	11089065	11093987	-	Molecular Function: binding (GO:0005488)	Pentatricopeptide repeat (IPR002885), Tetratricopeptide-like helical (IPR011990)
861	Os01t0301700-02	Hypothetical conserved gene.	chr01	11092527	11093959	-
862	Os01t0301900-00	Protein of unknown function DUF247, plant domain containing protein.	chr01	11110199	11110480	-		Protein of unknown function DUF247, plant (IPR004158)
863	Os01t0302000-00	Hypothetical conserved gene.	chr01	11118689	11119272	+
864	Os01t0302100-01	Conserved hypothetical protein.	chr01	11129520	11131876	+
865	Os01t0302250-01	Conserved hypothetical protein.	chr01	11155196	11155899	-
866	Os01t0302500-01	Knotted1-type homeobox protein OSH6.	chr01	11167043	11174451	+	Biological Process: regulation of transcription, DNA-dependent (GO:0006355), Cellular Component: nucleus (GO:0005634), Molecular Function: DNA binding (GO:0003677), Molecular Function: sequence-specific DNA binding transcription factor activity (GO:0003700), Molecular Function: protein binding (GO:0005515), Molecular Function: sequence-specific DNA binding (GO:0043565)	Homeobox (IPR001356), ELK (IPR005539), KNOX1 (IPR005540), KNOX2 (IPR005541), Homeobox KN domain (IPR008422), Homeodomain-like (IPR009057), Homeodomain-related (IPR012287), Homeobox, conserved site (IPR017970)
867	Os01t0302800-01	Conserved hypothetical protein.	chr01	11191761	11192447	+
868	Os01t0302900-01	Conserved hypothetical protein.	chr01	11198211	11200311	+
869	Os01t0303000-02	Similar to CP12 (Fragment).	chr01	11202609	11203331	-
870	Os01t0303100-01	Similar to Chitinase precursor (EC 3.2.1.17).	chr01	11208573	11209811	+	Biological Process: carbohydrate metabolic process (GO:0005975), Molecular Function: catalytic activity (GO:0003824), Molecular Function: hydrolase activity, hydrolyzing O-glycosyl compounds (GO:0004553), Molecular Function: cation binding (GO:0043169)	Glycoside hydrolase, family 18, catalytic domain (IPR001223), Glycoside hydrolase, chitinase active site (IPR001579), Glycoside hydrolase, subgroup, catalytic domain (IPR013781), Glycoside hydrolase, superfamily (IPR017853)
871	Os01t0303200-01	Conserved hypothetical protein.	chr01	11211855	11221413	+
872	Os01t0303300-01	Similar to Stress-inducible membrane pore protein.	chr01	11221847	11223469	-		Mitochondrial inner membrane translocase subunit Tim17/Tim22/Tim23/peroxisomal protein PMP24 (IPR003397)
873	Os01t0303401-00	Hypothetical gene.	chr01	11222066	11223392	+
874	Os01t0303600-01	Zinc finger, RING/FYVE/PHD-type domain containing protein.	chr01	11231975	11234809	-	Molecular Function: zinc ion binding (GO:0008270)	Zinc finger, RING-CH-type (IPR011016), Zinc finger, RING/FYVE/PHD-type (IPR013083), Protein of unknown function DUF3675 (IPR022143)
875	Os01t0303800-01	UspA domain containing protein.	chr01	11245253	11246737	+	Biological Process: response to stress (GO:0006950)	Universal stress protein A (IPR006015), UspA (IPR006016), Rossmann-like alpha/beta/alpha sandwich fold (IPR014729)
876	Os01t0303800-02	UspA domain containing protein.	chr01	11245276	11246714	+	Biological Process: response to stress (GO:0006950)	Universal stress protein A (IPR006015), UspA (IPR006016), Rossmann-like alpha/beta/alpha sandwich fold (IPR014729)
877	Os01t0304000-01	Similar to Ribosomal protein L29.	chr01	11249654	11251227	-	Biological Process: translation (GO:0006412), Cellular Component: intracellular (GO:0005622), Cellular Component: ribosome (GO:0005840), Molecular Function: structural constituent of ribosome (GO:0003735)	Ribosomal protein L29e (IPR002673)
878	Os01t0304050-01	Non-protein coding transcript.	chr01	11253627	11266197	+
879	Os01t0304100-00	Similar to Cation chloride cotransporter.	chr01	11254144	11260516	-	Biological Process: transport (GO:0006810), Biological Process: transmembrane transport (GO:0055085), Cellular Component: membrane (GO:0016020)	Amino acid permease domain (IPR004841)
880	Os01t0304200-00	Similar to Transcription factor PCF7.	chr01	11269325	11273164	-
881	Os01t0304300-01	Similar to predicted protein.	chr01	11272159	11277795	+		Protein of unknown function DUF616 (IPR006852)
882	Os01t0304400-00	Conserved hypothetical protein.	chr01	11283364	11284127	+
883	Os01t0304500-00	Hypothetical conserved gene.	chr01	11299784	11307932	-		Protein of unknown function DUF3778 (IPR022256)
884	Os01t0305200-01	Lg106-like family protein.	chr01	11316720	11320061	+		Endosulphine (IPR006760)
885	Os01t0305300-01	Non-protein coding transcript.	chr01	11317192	11317678	+
886	Os01t0305900-01	Similar to R2R3 Myb transcription factor MYB-IF35.	chr01	11350507	11356863	+	Biological Process: regulation of transcription, DNA-dependent (GO:0006355), Molecular Function: DNA binding (GO:0003677), Molecular Function: protein binding (GO:0005515)	SANT domain, DNA binding (IPR001005), Homeodomain-like (IPR009057), Homeodomain-related (IPR012287), Myb, DNA-binding (IPR014778), Myb transcription factor (IPR015495), Transcription regulator HTH, Myb-type, DNA-binding (IPR017930)
887	Os01t0306100-01	Plant specific eukaryotic initiation factor 4B family protein.	chr01	11364355	11365344	-		Plant specific eukaryotic initiation factor 4B (IPR010433)
888	Os01t0306200-01	Protein of unknown function DUF3511 domain containing protein.	chr01	11366633	11367460	-		Protein of unknown function DUF3511 (IPR021899)
889	Os01t0306400-01	Hypothetical conserved gene.	chr01	11378620	11380071	+
890	Os01t0306800-01	Conserved hypothetical protein.	chr01	11412154	11421047	+
891	Os01t0306800-02	Hypothetical conserved gene.	chr01	11412176	11420982	+
892	Os01t0306900-01	Protein of unknown function DUF789 family protein.	chr01	11426447	11430996	-		Protein of unknown function DUF789 (IPR008507)
893	Os01t0307500-01	Na<sup>+</sup> transporter, A member of HKT (high-affinity K<sup>+</sup> transporter)-type transporters, Regulation of K<sup>+</sup>/Na<sup>+</sup> homeostasis, Salt tolerance	chr01	11458956	11463442	-	Biological Process: cation transport (GO:0006812), Biological Process: transmembrane transport (GO:0055085), Molecular Function: cation transmembrane transporter activity (GO:0008324)	Cation transporter (IPR003445)
894	Os01t0307562-00	Similar to JD1.	chr01	11494771	11496222	-
895	Os01t0307624-01	Conserved hypothetical protein.	chr01	11502003	11504425	-
896	Os01t0307686-00	Similar to embryonic abundant protein-like.	chr01	11505079	11506118	-
897	Os01t0307750-00	Hypothetical gene.	chr01	11515321	11515989	+
898	Os01t0308200-02	Hypothetical protein.	chr01	11526387	11528207	-
899	Os01t0308200-01	Hypothetical protein.	chr01	11526561	11530094	-
900	Os01t0308300-00	NB-ARC domain containing protein.	chr01	11526651	11529893	+	Biological Process: defense response (GO:0006952), Molecular Function: ADP binding (GO:0043531)	Disease resistance protein (IPR000767), NB-ARC (IPR002182)
901	Os01t0308600-00	Conserved hypothetical protein.	chr01	11544302	11545430	-
902	Os01t0308700-00	Similar to H0315A08.1 protein.	chr01	11549976	11550801	-		Ribonuclease H1, N-terminal (IPR011320)
903	Os01t0309100-01	Similar to anther-specific protein SF18.	chr01	11585607	11586480	+
904	Os01t0309451-01	Hypothetical gene.	chr01	11607650	11608129	-
905	Os01t0309800-01	Similar to Hydrogenase expression/formation protein hypB.	chr01	11611069	11612597	+	Biological Process: metal ion transport (GO:0030001), Molecular Function: metal ion binding (GO:0046872)	Heavy metal-associated domain, HMA (IPR006121)
906	Os01t0309900-01	Lipase, class 3 family protein.	chr01	11618335	11622522	+	Biological Process: lipid metabolic process (GO:0006629), Biological Process: lipid catabolic process (GO:0016042), Molecular Function: carboxylesterase activity (GO:0004091), Molecular Function: triglyceride lipase activity (GO:0004806)	Lipase, class 3 (IPR002921), Mono-/di-acylglycerol lipase, N-terminal (IPR005592)
907	Os01t0309966-00	Hypothetical protein.	chr01	11619605	11620204	-
908	Os01t0310032-00	Similar to Cold-regulated protein.	chr01	11624254	11624835	-
909	Os01t0310100-01	Similar to PLDP1 (PHOSPHOLIPASE D P1); phospholipase D.	chr01	11625271	11637356	-		Phospholipase D (IPR015679)
910	Os01t0310500-01	Protein kinase, catalytic domain domain containing protein.	chr01	11655138	11666398	+	Biological Process: protein phosphorylation (GO:0006468), Molecular Function: protein kinase activity (GO:0004672), Molecular Function: protein serine/threonine kinase activity (GO:0004674), Molecular Function: protein tyrosine kinase activity (GO:0004713), Molecular Function: ATP binding (GO:0005524), Molecular Function: transferase activity, transferring phosphorus-containing groups (GO:0016772)	Protein kinase, catalytic domain (IPR000719), Serine-threonine/tyrosine-protein kinase (IPR001245), Serine/threonine-protein kinase, catalytic domain (IPR002290), Serine/threonine-protein kinase, active site (IPR008271), Protein kinase-like domain (IPR011009), Protein kinase, ATP binding site (IPR017441), Tyrosine-protein kinase, catalytic domain (IPR020635)
911	Os01t0310500-02	Conserved hypothetical protein.	chr01	11662723	11666347	+
912	Os01t0310550-01	Non-protein coding transcript.	chr01	11665735	11666894	-
913	Os01t0310600-01	Non-protein coding transcript.	chr01	11667261	11667683	-
914	Os01t0310700-01	Non-protein coding transcript.	chr01	11670153	11670582	+
915	Os01t0310800-01	Similar to Pto kinase interactor 1.	chr01	11677483	11681874	+	Biological Process: protein phosphorylation (GO:0006468), Molecular Function: protein kinase activity (GO:0004672), Molecular Function: protein serine/threonine kinase activity (GO:0004674), Molecular Function: protein tyrosine kinase activity (GO:0004713), Molecular Function: ATP binding (GO:0005524), Molecular Function: transferase activity, transferring phosphorus-containing groups (GO:0016772)	Protein kinase, catalytic domain (IPR000719), Serine-threonine/tyrosine-protein kinase (IPR001245), Serine/threonine-protein kinase, catalytic domain (IPR002290), Protein kinase-like domain (IPR011009), Protein kinase, ATP binding site (IPR017441), Serine/threonine-protein kinase-like domain (IPR017442), Tyrosine-protein kinase, catalytic domain (IPR020635)
916	Os01t0311100-00	Similar to RING-H2 finger protein ATL2L.	chr01	11686442	11687191	+	Molecular Function: protein binding (GO:0005515), Molecular Function: zinc ion binding (GO:0008270)	Zinc finger, RING-type (IPR001841), Zinc finger, RING/FYVE/PHD-type (IPR013083), Zinc finger, RING-H2-type (IPR024766)
917	Os01t0311300-01	Similar to Sorbitol transporter.	chr01	11688361	11689046	-	Biological Process: transmembrane transport (GO:0055085), Cellular Component: integral to membrane (GO:0016021), Molecular Function: transmembrane transporter activity (GO:0022857)	General substrate transporter (IPR005828)
918	Os01t0311400-00	Zinc finger, RING/FYVE/PHD-type domain containing protein.	chr01	11690379	11690975	+	Molecular Function: protein binding (GO:0005515), Molecular Function: zinc ion binding (GO:0008270)	Zinc finger, RING-type (IPR001841), Zinc finger, RING/FYVE/PHD-type (IPR013083), Zinc finger, RING-H2-type (IPR024766)
919	Os01t0311500-01	Similar to PHS1 (PROPYZAMIDE-HYPERSENSITIVE 1); phosphoprotein phosphatase/ protein tyrosine/serine/threonine phosphatase.	chr01	11693812	11699838	+	Biological Process: protein dephosphorylation (GO:0006470), Biological Process: dephosphorylation (GO:0016311), Molecular Function: protein tyrosine phosphatase activity (GO:0004725), Molecular Function: protein tyrosine/serine/threonine phosphatase activity (GO:0008138), Molecular Function: transferase activity, transferring phosphorus-containing groups (GO:0016772), Molecular Function: phosphot…	Dual specificity phosphatase, catalytic domain (IPR000340), Protein-tyrosine/Dual-specificity phosphatase (IPR000387), Phosphatidylinositol 3-/4-kinase, catalytic (IPR000403), Protein kinase-like domain (IPR011009), Actin-fragmin kinase, catalytic (IPR015275), Protein-tyrosine phosphatase, active site (IPR016130), Dual specificity phosphatase, subgroup, catalytic domain (IPR020422)
920	Os01t0311500-02	Similar to predicted protein.	chr01	11698118	11699832	+	Biological Process: protein dephosphorylation (GO:0006470), Biological Process: dephosphorylation (GO:0016311), Molecular Function: protein tyrosine phosphatase activity (GO:0004725), Molecular Function: protein tyrosine/serine/threonine phosphatase activity (GO:0008138), Molecular Function: phosphatase activity (GO:0016791)	Dual specificity phosphatase, catalytic domain (IPR000340), Protein-tyrosine/Dual-specificity phosphatase (IPR000387), Protein-tyrosine phosphatase, active site (IPR016130), Dual specificity phosphatase, subgroup, catalytic domain (IPR020422)
921	Os01t0311600-01	Sulfotransferase family protein.	chr01	11703247	11704653	-	Molecular Function: sulfotransferase activity (GO:0008146)	Sulfotransferase domain (IPR000863)
922	Os01t0311700-01	Pectinesterase inhibitor domain containing protein.	chr01	11713650	11714674	+	Molecular Function: enzyme inhibitor activity (GO:0004857), Molecular Function: pectinesterase activity (GO:0030599)	Pectinesterase inhibitor (IPR006501)
923	Os01t0311800-01	Similar to Pectin methylesterase 8 (Fragment).	chr01	11715268	11717784	-	Biological Process: cell wall modification (GO:0042545), Cellular Component: cell wall (GO:0005618), Molecular Function: enzyme inhibitor activity (GO:0004857), Molecular Function: pectinesterase activity (GO:0030599)	Pectinesterase, catalytic (IPR000070), Pectinesterase inhibitor (IPR006501), Pectin lyase fold/virulence factor (IPR011050), Pectin lyase fold (IPR012334), Pectinesterase, active site (IPR018040)
924	Os01t0311800-02	Similar to Pectinesterase.	chr01	11716329	11717780	-	Biological Process: cell wall modification (GO:0042545), Cellular Component: cell wall (GO:0005618), Molecular Function: enzyme inhibitor activity (GO:0004857), Molecular Function: pectinesterase activity (GO:0030599)	Pectinesterase, catalytic (IPR000070), Pectinesterase inhibitor (IPR006501), Pectin lyase fold/virulence factor (IPR011050), Pectin lyase fold (IPR012334)
925	Os01t0312500-01	Similar to Pectinesterase.	chr01	11741908	11750685	+	Biological Process: cell wall modification (GO:0042545), Cellular Component: cell wall (GO:0005618), Molecular Function: enzyme inhibitor activity (GO:0004857), Molecular Function: pectinesterase activity (GO:0030599)	Pectinesterase, catalytic (IPR000070), Pectinesterase inhibitor (IPR006501), Pectin lyase fold/virulence factor (IPR011050), Pectin lyase fold (IPR012334), Pectinesterase, active site (IPR018040)
926	Os01t0312600-00	Hypothetical protein.	chr01	11742340	11750448	-
927	Os01t0312800-01	Similar to CEL4=CELLULASE 4 (Fragment).	chr01	11756949	11759565	+	Biological Process: carbohydrate metabolic process (GO:0005975), Molecular Function: catalytic activity (GO:0003824), Molecular Function: hydrolase activity, hydrolyzing O-glycosyl compounds (GO:0004553)	Glycoside hydrolase, family 9 (IPR001701), Six-hairpin glycosidase-like (IPR008928), Six-hairpin glycosidase (IPR012341), Glycoside hydrolase, family 9, active site (IPR018221)
928	Os01t0313050-00	Hypothetical protein.	chr01	11757105	11759216	-
929	Os01t0313300-01	Similar to EREBP-3 protein (Fragment).	chr01	11783910	11784899	+	Biological Process: regulation of transcription, DNA-dependent (GO:0006355), Molecular Function: DNA binding (GO:0003677), Molecular Function: sequence-specific DNA binding transcription factor activity (GO:0003700)	Pathogenesis-related transcriptional factor/ERF, DNA-binding (IPR001471), DNA-binding, integrase-type (IPR016177)
930	Os01t0313600-01	Conserved hypothetical protein.	chr01	11793851	11795359	-
931	Os01t0314000-02	Protein of unknown function DUF3615 domain containing protein.	chr01	11800240	11802735	-		Protein of unknown function DUF3615 (IPR022059)
932	Os01t0314000-01	Protein of unknown function DUF3615 domain containing protein.	chr01	11801395	11803815	-		Protein of unknown function DUF3615 (IPR022059)
933	Os01t0314000-03	Protein of unknown function DUF3615 domain containing protein.	chr01	11801395	11803396	-		Protein of unknown function DUF3615 (IPR022059)
934	Os01t0314100-01	Catalytic domain of components of various dehydrogenase complexes containing protein.	chr01	11804161	11809029	-	Biological Process: metabolic process (GO:0008152), Biological Process: fatty-acyl-CoA biosynthetic process (GO:0046949), Molecular Function: transferase activity, transferring acyl groups (GO:0016746), Molecular Function: dihydrolipoyllysine-residue (2-methylpropanoyl)transferase activity (GO:0043754), Molecular Function: cofactor binding (GO:0048037)	Biotin/lipoyl attachment (IPR000089), 2-oxoacid dehydrogenase acyltransferase, catalytic domain (IPR001078), 2-oxo acid dehydrogenase, lipoyl-binding site (IPR003016), E3 binding (IPR004167), Single hybrid motif (IPR011053), Lipoamide Acyltransferase (IPR015761), Chloramphenicol acetyltransferase-like domain (IPR023213)
935	Os01t0314300-01	Uncharacterized domain 2 containing protein.	chr01	11812190	11815785	-	Molecular Function: RNA binding (GO:0003723)	Pseudouridine synthase/archaeosine transglycosylase (IPR002478), Uncharacterised domain CHP00451 (IPR004521), PUA-like domain (IPR015947), Translation-associated RNA-binding, predicted (IPR016437)
936	Os01t0314300-02	Uncharacterized domain 2 containing protein.	chr01	11812242	11815733	-	Molecular Function: RNA binding (GO:0003723)	Pseudouridine synthase/archaeosine transglycosylase (IPR002478), Uncharacterised domain CHP00451 (IPR004521), PUA-like domain (IPR015947), Translation-associated RNA-binding, predicted (IPR016437)
937	Os01t0314600-00	Similar to Cytochrome c oxidoreductase.	chr01	11848194	11852000	+	Cellular Component: integral to membrane (GO:0016021)	RAG1-activating protein-1-related (IPR004316)
938	Os01t0314800-01	Late embryogenesis abundant protein 3 family protein.	chr01	11863682	11864412	-	Biological Process: response to stress (GO:0006950)	Late embryogenesis abundant protein, LEA-5 (IPR004926)
939	Os01t0315600-01	Similar to Monoglyceride lipase.	chr01	11897584	11902407	+		Alpha/beta hydrolase, N-terminal (IPR022742)
940	Os01t0315700-01	Similar to Monoglyceride lipase.	chr01	11906167	11906868	+
941	Os01t0315800-01	UDP-glucuronic acid decarboxylase (EC 4.1.1.35).	chr01	11906864	11910915	-	Biological Process: cellular metabolic process (GO:0044237), Molecular Function: nucleotide binding (GO:0000166), Molecular Function: catalytic activity (GO:0003824), Molecular Function: coenzyme binding (GO:0050662)	NAD-dependent epimerase/dehydratase (IPR001509), NAD(P)-binding domain (IPR016040)
942	Os01t0315800-02	Similar to DTDP-glucose 4-6-dehydratase-like protein (Fragment).	chr01	11906902	11909320	-	Biological Process: cellular metabolic process (GO:0044237), Molecular Function: nucleotide binding (GO:0000166), Molecular Function: catalytic activity (GO:0003824), Molecular Function: coenzyme binding (GO:0050662)	NAD-dependent epimerase/dehydratase (IPR001509), NAD(P)-binding domain (IPR016040)
943	Os01t0315850-00	Hypothetical protein.	chr01	11907260	11910774	+
944	Os01t0316001-01	Hypothetical conserved gene.	chr01	11939917	11943540	+
945	Os01t0316100-00	FAD dependent oxidoreductase family protein.	chr01	11944340	11945793	-	Biological Process: oxidation-reduction process (GO:0055114), Molecular Function: oxidoreductase activity (GO:0016491)	FAD dependent oxidoreductase (IPR006076)
946	Os01t0316500-01	Conserved hypothetical protein.	chr01	11953342	11955432	-
947	Os01t0316600-01	Similar to pre-mRNA-splicing factor SF2.	chr01	11958911	11964676	+	Molecular Function: nucleotide binding (GO:0000166), Molecular Function: nucleic acid binding (GO:0003676)	RNA recognition motif domain (IPR000504), Nucleotide-binding, alpha-beta plait (IPR012677)
948	Os01t0316800-01	Similar to Deleted in split hand/splt foot protein (Fragment).	chr01	11970752	11972299	+
949	Os01t0316900-01	Conserved hypothetical protein.	chr01	11974217	11981782	+
950	Os01t0317125-00	Hypothetical protein.	chr01	11977716	11981576	-
951	Os01t0317500-00	Similar to esterase/lipase/thioesterase family protein.	chr01	12031970	12032254	+
952	Os01t0317800-01	Alpha/beta hydrolase family protein.	chr01	12067684	12068949	+		Alpha/beta hydrolase fold-1 (IPR000073)
953	Os01t0318000-00	Similar to esterase/lipase/thioesterase family protein.	chr01	12074526	12075088	+
954	Os01t0318201-01	Non-protein coding transcript.	chr01	12078156	12078670	-
955	Os01t0318202-01	Hypothetical gene.	chr01	12091637	12093705	-
956	Os01t0318400-00	Conserved hypothetical protein.	chr01	12092783	12093601	+
957	Os01t0318600-00	Hypothetical protein.	chr01	12106488	12110603	-
958	Os01t0318700-01	Similar to ABC1 protein (Fragment).	chr01	12108871	12110713	+
959	Os01t0319000-01	Similar to Pectin acetylesterase (Fragment).	chr01	12117107	12123026	+		Pectinacetylesterase (IPR004963)
960	Os01t0319000-02	Similar to Pectin acetylesterase (Fragment).	chr01	12117365	12122789	+		Pectinacetylesterase (IPR004963)
961	Os01t0319066-00	Hypothetical protein.	chr01	12117811	12122730	-
962	Os01t0319200-00	Hypothetical conserved gene.	chr01	12129716	12131035	-		Protein of unknown function DUF247, plant (IPR004158)
963	Os01t0319400-01	Protein of unknown function DUF247, plant domain containing protein.	chr01	12157459	12161767	-		Protein of unknown function DUF247, plant (IPR004158)
964	Os01t0320400-01	Conserved hypothetical protein.	chr01	12203402	12204078	-
965	Os01t0320700-01	Hypothetical protein.	chr01	12214028	12214637	+
966	Os01t0321300-00	Similar to Protein translocase subunit secA.	chr01	12235589	12248125	-	Biological Process: protein targeting (GO:0006605), Biological Process: intracellular protein transport (GO:0006886), Biological Process: protein import (GO:0017038), Cellular Component: membrane (GO:0016020), Molecular Function: ATP binding (GO:0005524)	SecA protein (IPR000185), SecA DEAD-like, N-terminal (IPR011115), SecA preprotein, cross-linking domain (IPR011130), SecA motor DEAD (IPR014018)
967	Os01t0321500-00	Hypothetical protein.	chr01	12248641	12249394	-
968	Os01t0321700-01	Similar to predicted protein.	chr01	12258138	12263046	-	Biological Process: intracellular protein transport (GO:0006886), Biological Process: ER to Golgi vesicle-mediated transport (GO:0006888), Cellular Component: COPII vesicle coat (GO:0030127), Molecular Function: zinc ion binding (GO:0008270)	Zinc finger, Sec23/Sec24-type (IPR006895), Sec23/Sec24, trunk domain (IPR006896), Sec23/Sec24, helical domain (IPR006900), Sec23/Sec24 beta-sandwich (IPR012990)
969	Os01t0321700-02	Similar to predicted protein.	chr01	12258257	12260926	-	Biological Process: intracellular protein transport (GO:0006886), Biological Process: ER to Golgi vesicle-mediated transport (GO:0006888), Cellular Component: COPII vesicle coat (GO:0030127)	Sec23/Sec24, helical domain (IPR006900), Gelsolin domain (IPR007123)
970	Os01t0321800-01	Gas vesicle protein GvpC repeat containing protein.	chr01	12264911	12269038	+		NEFA-interacting nuclear protein NIP30, N-terminal (IPR019331)
971	Os01t0321900-00	Hypothetical conserved gene.	chr01	12279993	12280517	-
972	Os01t0322300-00	Similar to soluble inorganic pyrophosphatase.	chr01	12291766	12292395	-	Biological Process: phosphate-containing compound metabolic process (GO:0006796), Cellular Component: cytoplasm (GO:0005737), Molecular Function: magnesium ion binding (GO:0000287), Molecular Function: inorganic diphosphatase activity (GO:0004427)	Inorganic pyrophosphatase (IPR008162)
973	Os01t0322700-01	Primary microRNA of OsmiR408; Target gene(s): OsUCL8 (Os03g0709100), OsUCL7 (Os03g0259100), Regulation of panicle branching and grain weight, Regulation of grain yield and photosynthesis	chr01	12301586	12302556	+
974	Os01t0322800-01	WD40 repeat-like domain containing protein.	chr01	12303210	12309435	-	Molecular Function: protein binding (GO:0005515)	WD40 repeat (IPR001680), LisH dimerisation motif (IPR006594), CTLH, C-terminal LisH motif (IPR006595), WD40 repeat-like-containing domain (IPR011046), WD40/YVTN repeat-like-containing domain (IPR015943), WD40-repeat-containing domain (IPR017986), WD40 repeat, conserved site (IPR019775), WD40 repeat, subgroup (IPR019781), WD40 repeat 2 (IPR019782), G-protein beta WD-40 repeat (IPR020472)
975	Os01t0323000-01	Similar to Ser Thr specific protein kinase-like protein.	chr01	12326546	12331707	+	Biological Process: protein phosphorylation (GO:0006468), Molecular Function: protein kinase activity (GO:0004672), Molecular Function: protein serine/threonine kinase activity (GO:0004674), Molecular Function: ATP binding (GO:0005524), Molecular Function: transferase activity, transferring phosphorus-containing groups (GO:0016772)	Protein kinase, catalytic domain (IPR000719), Serine/threonine-protein kinase, active site (IPR008271), Protein kinase-like domain (IPR011009), Protein kinase, ATP binding site (IPR017441), Serine/threonine-protein kinase-like domain (IPR017442)
976	Os01t0323000-02	Similar to BRASSINOSTEROID INSENSITIVE 1-associated receptor kinase 1.	chr01	12328404	12331613	+	Biological Process: protein phosphorylation (GO:0006468), Molecular Function: protein kinase activity (GO:0004672), Molecular Function: protein serine/threonine kinase activity (GO:0004674), Molecular Function: protein tyrosine kinase activity (GO:0004713), Molecular Function: ATP binding (GO:0005524), Molecular Function: transferase activity, transferring phosphorus-containing groups (GO:0016772)	Protein kinase, catalytic domain (IPR000719), Serine/threonine-protein kinase, catalytic domain (IPR002290), Serine/threonine-protein kinase, active site (IPR008271), Protein kinase-like domain (IPR011009), Serine/threonine-protein kinase-like domain (IPR017442), Tyrosine-protein kinase, catalytic domain (IPR020635)
977	Os01t0323100-01	Similar to Pto kinase interactor 1.	chr01	12332795	12337225	-	Biological Process: protein phosphorylation (GO:0006468), Molecular Function: protein kinase activity (GO:0004672), Molecular Function: protein serine/threonine kinase activity (GO:0004674), Molecular Function: ATP binding (GO:0005524), Molecular Function: transferase activity, transferring phosphorus-containing groups (GO:0016772)	Protein kinase, catalytic domain (IPR000719), Serine-threonine/tyrosine-protein kinase (IPR001245), Serine/threonine-protein kinase, active site (IPR008271), Protein kinase-like domain (IPR011009), Protein kinase, ATP binding site (IPR017441)
978	Os01t0323300-00	RNA-binding, CRM domain domain containing protein.	chr01	12344403	12350966	+	Molecular Function: RNA binding (GO:0003723)	RNA-binding, CRM domain (IPR001890)
979	Os01t0323500-01	Conserved hypothetical protein.	chr01	12351672	12353063	-
980	Os01t0323600-01	Similar to S-adenosylmethionine synthase 2.	chr01	12363841	12366314	-	Biological Process: S-adenosylmethionine biosynthetic process (GO:0006556), Molecular Function: methionine adenosyltransferase activity (GO:0004478), Molecular Function: ATP binding (GO:0005524)	S-adenosylmethionine synthetase (IPR002133), S-adenosylmethionine synthetase, N-terminal (IPR022628), S-adenosylmethionine synthetase, central domain (IPR022629), S-adenosylmethionine synthetase, C-terminal (IPR022630), S-adenosylmethionine synthetase, conserved site (IPR022631), S-adenosylmethionine synthetase superfamily (IPR022636)
981	Os01t0323775-00	Hypothetical protein.	chr01	12363862	12365491	+
982	Os01t0323950-00	Similar to Glycine-rich protein 2b.	chr01	12371544	12376437	-	Molecular Function: nucleic acid binding (GO:0003676), Molecular Function: zinc ion binding (GO:0008270)	Zinc finger, CCHC-type (IPR001878), Zinc finger, CCHC retroviral-type (IPR013084)
983	Os01t0324400-03	Similar to cDNA clone:J033110L02, full insert sequence.	chr01	12403525	12407716	-
984	Os01t0324400-02	Protein of unknown function DUF3615 domain containing protein.	chr01	12403541	12407991	-		Protein of unknown function DUF3615 (IPR022059)
985	Os01t0324400-01	Hypothetical conserved gene.	chr01	12407462	12408003	-
986	Os01t0326000-01	Similar to Peroxidase (Fragment).	chr01	12499923	12504190	+	Biological Process: response to oxidative stress (GO:0006979), Biological Process: oxidation-reduction process (GO:0055114), Molecular Function: peroxidase activity (GO:0004601), Molecular Function: heme binding (GO:0020037)	Plant peroxidase (IPR000823), Haem peroxidase, plant/fungal/bacterial (IPR002016), Haem peroxidase (IPR010255), Peroxidases heam-ligand binding site (IPR019793), Peroxidase, active site (IPR019794)
987	Os01t0326000-02	Similar to Class III peroxidase 13.	chr01	12503020	12504209	+	Biological Process: response to oxidative stress (GO:0006979), Biological Process: oxidation-reduction process (GO:0055114), Molecular Function: peroxidase activity (GO:0004601), Molecular Function: heme binding (GO:0020037)	Plant peroxidase (IPR000823), Haem peroxidase, plant/fungal/bacterial (IPR002016), Haem peroxidase (IPR010255), Peroxidases heam-ligand binding site (IPR019793)
988	Os01t0326100-01	Similar to Peroxidase component PR-2 and/or 4 (Fragment).	chr01	12509590	12510760	+	Biological Process: response to oxidative stress (GO:0006979), Biological Process: oxidation-reduction process (GO:0055114), Molecular Function: peroxidase activity (GO:0004601), Molecular Function: heme binding (GO:0020037)	Haem peroxidase, plant/fungal/bacterial (IPR002016), Haem peroxidase (IPR010255), Peroxidase, active site (IPR019794)
989	Os01t0326100-02	Non-protein coding transcript.	chr01	12510619	12511125	+
990	Os01t0326300-01	Haem peroxidase, plant/fungal/bacterial family protein.	chr01	12517993	12519238	+	Biological Process: response to oxidative stress (GO:0006979), Biological Process: oxidation-reduction process (GO:0055114), Molecular Function: peroxidase activity (GO:0004601), Molecular Function: heme binding (GO:0020037)	Plant peroxidase (IPR000823), Haem peroxidase, plant/fungal/bacterial (IPR002016), Haem peroxidase (IPR010255), Peroxidases heam-ligand binding site (IPR019793)
991	Os01t0327000-01	Similar to Class III peroxidase 14.	chr01	12551333	12557268	+	Biological Process: response to oxidative stress (GO:0006979), Biological Process: oxidation-reduction process (GO:0055114), Molecular Function: peroxidase activity (GO:0004601), Molecular Function: heme binding (GO:0020037)	Plant peroxidase (IPR000823), Haem peroxidase, plant/fungal/bacterial (IPR002016), Haem peroxidase (IPR010255), Peroxidase, active site (IPR019794)
992	Os01t0327100-01	Haem peroxidase family protein.	chr01	12564283	12570030	+	Biological Process: response to oxidative stress (GO:0006979), Biological Process: oxidation-reduction process (GO:0055114), Molecular Function: peroxidase activity (GO:0004601), Molecular Function: heme binding (GO:0020037)	Plant peroxidase (IPR000823), Haem peroxidase, plant/fungal/bacterial (IPR002016), Haem peroxidase (IPR010255), Peroxidases heam-ligand binding site (IPR019793), Peroxidase, active site (IPR019794)
993	Os01t0327250-00	Hypothetical protein.	chr01	12564382	12569579	-
994	Os01t0327100-02	Similar to Peroxidase 8.	chr01	12568431	12569866	+	Biological Process: response to oxidative stress (GO:0006979), Biological Process: oxidation-reduction process (GO:0055114), Molecular Function: peroxidase activity (GO:0004601), Molecular Function: heme binding (GO:0020037)	Plant peroxidase (IPR000823), Haem peroxidase, plant/fungal/bacterial (IPR002016), Haem peroxidase (IPR010255), Peroxidases heam-ligand binding site (IPR019793)
995	Os01t0327400-01	Similar to Peroxidase (Fragment).	chr01	12578189	12582256	+	Biological Process: response to oxidative stress (GO:0006979), Biological Process: oxidation-reduction process (GO:0055114), Molecular Function: peroxidase activity (GO:0004601), Molecular Function: heme binding (GO:0020037)	Plant peroxidase (IPR000823), Haem peroxidase, plant/fungal/bacterial (IPR002016), Haem peroxidase (IPR010255), Peroxidases heam-ligand binding site (IPR019793), Peroxidase, active site (IPR019794)
996	Os01t0327500-01	Conserved hypothetical protein.	chr01	12582768	12583460	-
997	Os01t0327600-02	Hypothetical conserved gene.	chr01	12584827	12594554	-	Biological Process: protein phosphorylation (GO:0006468), Molecular Function: protein kinase activity (GO:0004672), Molecular Function: protein serine/threonine kinase activity (GO:0004674), Molecular Function: protein binding (GO:0005515), Molecular Function: ATP binding (GO:0005524), Molecular Function: transferase activity, transferring phosphorus-containing groups (GO:0016772)	BEACH domain (IPR000409), Protein kinase, catalytic domain (IPR000719), WD40 repeat (IPR001680), Serine/threonine-protein kinase, catalytic domain (IPR002290), Protein kinase-like domain (IPR011009), WD40 repeat-like-containing domain (IPR011046), WD40/YVTN repeat-like-containing domain (IPR015943), Serine/threonine-protein kinase-like domain (IPR017442), WD40-repeat-containing domain (IPR017986)…
998	Os01t0327600-01	Conserved hypothetical protein.	chr01	12584890	12594761	-
999	Os01t0327900-00	Hypothetical conserved gene.	chr01	12615286	12617245	-	Molecular Function: protein binding (GO:0005515)	F-box domain, cyclin-like (IPR001810), Protein of unknown function DUF295 (IPR005174), F-box domain, Skp2-like (IPR022364)
1000	Os01t0328300-01	Similar to cDNA clone:J033084P10, full insert sequence.	chr01	12636445	12640675	-		Protein of unknown function DUF295 (IPR005174), F-box domain, Skp2-like (IPR022364)
1001	Os01t0328300-02	Hypothetical conserved gene.	chr01	12637330	12640601	-		Protein of unknown function DUF295 (IPR005174), F-box domain, Skp2-like (IPR022364)
1002	Os01t0328300-03	Protein of unknown function DUF295 domain containing protein.	chr01	12637549	12640586	-		Protein of unknown function DUF295 (IPR005174), F-box domain, Skp2-like (IPR022364)
1003	Os01t0328400-01	Ubiquitin.	chr01	12645608	12646401	-	Biological Process: translation (GO:0006412), Cellular Component: intracellular (GO:0005622), Cellular Component: ribosome (GO:0005840), Molecular Function: structural constituent of ribosome (GO:0003735), Molecular Function: protein binding (GO:0005515)	Ubiquitin (IPR000626), Ribosomal protein S27a (IPR002906), Ubiquitin conserved site (IPR019954), Ubiquitin supergroup (IPR019955), Ubiquitin subgroup (IPR019956)
1004	Os01t0328500-01	Bucentaur or craniofacial development family protein.	chr01	12646586	12650012	+		Craniofacial development protein 1/Bucentaur (IPR011421)
1005	Os01t0328600-01	Similar to cyclase/dehydrase.	chr01	12650573	12654287	+
1006	Os01t0328700-01	FAD-dependent pyridine nucleotide-disulphide oxidoreductase domain containing protein.	chr01	12655016	12658349	-	Biological Process: cell redox homeostasis (GO:0045454), Biological Process: oxidation-reduction process (GO:0055114), Cellular Component: cytoplasm (GO:0005737), Molecular Function: dihydrolipoyl dehydrogenase activity (GO:0004148), Molecular Function: oxidoreductase activity (GO:0016491), Molecular Function: oxidoreductase activity, acting on a sulfur group of donors, NAD or NADP as acceptor (G…	Pyridine nucleotide-disulphide oxidoreductase, NAD-binding domain (IPR001327), Pyridine nucleotide-disulphide oxidoreductase, dimerisation (IPR004099), Dihydrolipoamide dehydrogenase (IPR006258), Pyridine nucleotide-disulphide oxidoreductase, class I, active site (IPR012999), FAD-dependent pyridine nucleotide-disulphide oxidoreductase (IPR013027), FAD/NAD-linked reductase, dimerisation (IPR016156…
1007	Os01t0328900-01	Glycosyl transferase, family 31 domain containing protein.	chr01	12667369	12672739	-	Biological Process: protein glycosylation (GO:0006486), Cellular Component: membrane (GO:0016020), Molecular Function: sugar binding (GO:0005529), Molecular Function: galactosyltransferase activity (GO:0008378)	Galectin, carbohydrate recognition domain (IPR001079), Glycosyl transferase, family 31 (IPR002659), Concanavalin A-like lectin/glucanase (IPR008985), Concanavalin A-like lectin/glucanase, subgroup (IPR013320)
1008	Os01t0329000-01	Phospholipid/glycerol acyltransferase domain containing protein.	chr01	12677044	12683455	-	Biological Process: metabolic process (GO:0008152), Molecular Function: transferase activity, transferring acyl groups (GO:0016746)	Phospholipid/glycerol acyltransferase (IPR002123)
1009	Os01t0329075-00	Hypothetical protein.	chr01	12677372	12683262	+
1010	Os01t0329150-00	Non-protein coding transcript.	chr01	12696476	12696689	-
1011	Os01t0329300-01	Pectin lyase fold domain containing protein.	chr01	12701744	12704532	+	Biological Process: carbohydrate metabolic process (GO:0005975), Molecular Function: polygalacturonase activity (GO:0004650)	Glycoside hydrolase, family 28 (IPR000743), Parallel beta-helix repeat (IPR006626), Pectin lyase fold/virulence factor (IPR011050), Pectin lyase fold (IPR012334)
1012	Os01t0329350-00	Hypothetical protein.	chr01	12702583	12704246	-
1013	Os01t0329400-01	Mitochondrial substrate carrier family protein.	chr01	12704756	12709781	-		Mitochondrial substrate/solute carrier (IPR018108), Mitochondrial carrier domain (IPR023395)
1014	Os01t0329400-02	Similar to predicted protein.	chr01	12704756	12707798	-		Mitochondrial substrate/solute carrier (IPR018108), Mitochondrial carrier domain (IPR023395)
1015	Os01t0329800-01	YT521-B-like protein family protein.	chr01	12725141	12730824	+		YTH domain (IPR007275)
1016	Os01t0329800-02	Hypothetical conserved gene.	chr01	12729794	12731526	+
1017	Os01t0329900-01	Similar to Lipase homolog (Fragment).	chr01	12734098	12738081	+	Biological Process: lipid metabolic process (GO:0006629), Molecular Function: hydrolase activity, acting on ester bonds (GO:0016788)	Lipase, GDSL (IPR001087)
1018	Os01t0329900-02	Hypothetical conserved gene.	chr01	12734098	12734900	+	Biological Process: lipid metabolic process (GO:0006629), Molecular Function: hydrolase activity, acting on ester bonds (GO:0016788)	Lipase, GDSL (IPR001087)
1019	Os01t0330001-00	Non-protein coding transcript.	chr01	12735654	12735854	-
1020	Os01t0330100-01	Similar to Alpha-L-fucosidase 2.	chr01	12742212	12745509	+
1021	Os01t0330200-00	Peptidase C1A, papain family protein.	chr01	12745559	12747074	-	Biological Process: proteolysis (GO:0006508), Molecular Function: cysteine-type endopeptidase activity (GO:0004197), Molecular Function: cysteine-type peptidase activity (GO:0008234)	Peptidase, cysteine peptidase active site (IPR000169), Peptidase C1A, papain C-terminal (IPR000668), Peptidase C1A, papain (IPR013128), Proteinase inhibitor I29, cathepsin propeptide (IPR013201)
1022	Os01t0330650-01	Hypothetical gene.	chr01	12762695	12765301	+
1023	Os01t0331100-01	Similar to Alpha-L-fucosidase 2.	chr01	12804579	12810204	+	Biological Process: lipid metabolic process (GO:0006629), Molecular Function: hydrolase activity, acting on ester bonds (GO:0016788)	Lipase, GDSL (IPR001087)
1024	Os01t0331500-00	Non-protein coding transcript.	chr01	12808477	12808654	-
1025	Os01t0331900-01	Protein of unknown function DUF846, eukaryotic family protein.	chr01	12848923	12853398	+	Cellular Component: integral to membrane (GO:0016021)	Protein of unknown function DUF846, eukaryotic (IPR008564)
1026	Os01t0331900-02	Protein of unknown function DUF846, eukaryotic family protein.	chr01	12849015	12853391	+	Cellular Component: integral to membrane (GO:0016021)	Protein of unknown function DUF846, eukaryotic (IPR008564)
1027	Os01t0332002-00	Non-protein coding transcript.	chr01	12860155	12860298	+
1028	Os01t0332100-01	Similar to Neutral invertase-like protein (Fragment).	chr01	12870240	12874218	+	Molecular Function: catalytic activity (GO:0003824)	Plant neutral invertase (IPR006937), Six-hairpin glycosidase-like (IPR008928)
1029	Os01t0332150-00	Hypothetical protein.	chr01	12870691	12873687	-
1030	Os01t0332100-02	Similar to Invertase.	chr01	12872493	12874172	+	Molecular Function: catalytic activity (GO:0003824)	Plant neutral invertase (IPR006937), Six-hairpin glycosidase-like (IPR008928)
1031	Os01t0332200-01	GA 2-oxidase2, GA metabolism	chr01	12875498	12885479	-	Biological Process: oxidation-reduction process (GO:0055114), Molecular Function: iron ion binding (GO:0005506), Molecular Function: oxidoreductase activity (GO:0016491), Molecular Function: oxidoreductase activity, acting on paired donors, with incorporation or reduction of molecular oxygen, 2-oxoglutarate as one donor, and incorporation of one atom each of oxygen into both donors (GO:0016706)	Isopenicillin N synthase (IPR002283), Oxoglutarate/iron-dependent oxygenase (IPR005123)
1032	Os01t0332500-01	Similar to Serine carboxypeptidase II-like protein.	chr01	12896359	12915380	+	Biological Process: proteolysis (GO:0006508), Molecular Function: serine-type carboxypeptidase activity (GO:0004185)	Peptidase S10, serine carboxypeptidase (IPR001563), Peptidase S10, serine carboxypeptidase, active site (IPR018202)
1033	Os01t0332700-00	Similar to predicted protein.	chr01	12909372	12909833	-
1034	Os01t0332800-02	Similar to SCPL33.	chr01	12915334	12919043	-	Biological Process: proteolysis (GO:0006508), Molecular Function: serine-type carboxypeptidase activity (GO:0004185)	Peptidase S10, serine carboxypeptidase (IPR001563), Peptidase S10, serine carboxypeptidase, active site (IPR018202)
1035	Os01t0332800-01	Similar to Serine carboxypeptidase II-like protein.	chr01	12915424	12919209	-	Biological Process: proteolysis (GO:0006508), Molecular Function: serine-type carboxypeptidase activity (GO:0004185)	Peptidase S10, serine carboxypeptidase (IPR001563), Peptidase S10, serine carboxypeptidase, active site (IPR018202)
1036	Os01t0332900-02	Similar to immediate-early protein RSP40.	chr01	12921581	12923390	-
1037	Os01t0332900-01	Similar to immediate-early protein RSP40.	chr01	12921594	12924616	-
1038	Os01t0333001-00	Non-protein coding transcript.	chr01	12924255	12925541	+
1039	Os01t0333600-00	Protein of unknown function DUF594 domain containing protein.	chr01	12980585	12982781	+		Protein of unknown function DUF594 (IPR007658)
1040	Os01t0335600-01	Conserved hypothetical protein.	chr01	13140037	13141283	+
1041	Os01t0335700-01	NB-ARC domain containing protein.	chr01	13142060	13144941	-	Biological Process: defense response (GO:0006952), Molecular Function: ADP binding (GO:0043531)	Disease resistance protein (IPR000767), NB-ARC (IPR002182)
1042	Os01t0336300-00	Hypothetical conserved gene.	chr01	13170797	13171929	-
1043	Os01t0337160-00	Conserved hypothetical protein.	chr01	13198486	13199578	-
1044	Os01t0337180-01	Hypothetical gene.	chr01	13198639	13199062	+
1045	Os01t0337100-00	Similar to Sesquiterpene synthase.	chr01	13211987	13218563	+	Biological Process: metabolic process (GO:0008152), Molecular Function: magnesium ion binding (GO:0000287), Molecular Function: lyase activity (GO:0016829)	Terpene synthase-like (IPR001906), Terpene synthase, metal-binding domain (IPR005630), Terpenoid cylases/protein prenyltransferase alpha-alpha toroid (IPR008930), Terpenoid synthase (IPR008949)
1046	Os01t0337500-00	Similar to H+-pyrophosphatase (Fragment).	chr01	13237248	13246058	+	Biological Process: proton transport (GO:0015992), Cellular Component: membrane (GO:0016020), Molecular Function: inorganic diphosphatase activity (GO:0004427), Molecular Function: hydrogen-translocating pyrophosphatase activity (GO:0009678)	Pyrophosphate-energised proton pump (IPR004131)
1047	Os01t0337600-02	Similar to binding.	chr01	13246387	13262169	-	Molecular Function: binding (GO:0005488)	Domain of unknown function DUF625 (IPR006887), Armadillo-type fold (IPR016024)
1048	Os01t0337600-01	Similar to predicted protein.	chr01	13254649	13262228	-		Domain of unknown function DUF625 (IPR006887)
1049	Os01t0337700-01	Conserved hypothetical protein.	chr01	13264930	13265538	+
1050	Os01t0337700-02	Conserved hypothetical protein.	chr01	13264941	13268354	+
1051	Os01t0337900-01	Similar to Dihydrolipoamide dehydrogenase.	chr01	13272614	13282008	+	Biological Process: cell redox homeostasis (GO:0045454), Biological Process: oxidation-reduction process (GO:0055114), Cellular Component: cytoplasm (GO:0005737), Molecular Function: dihydrolipoyl dehydrogenase activity (GO:0004148), Molecular Function: oxidoreductase activity (GO:0016491), Molecular Function: oxidoreductase activity, acting on a sulfur group of donors, NAD or NADP as acceptor (G…	Pyridine nucleotide-disulphide oxidoreductase, NAD-binding domain (IPR001327), Pyridine nucleotide-disulphide oxidoreductase, dimerisation (IPR004099), Dihydrolipoamide dehydrogenase (IPR006258), Pyridine nucleotide-disulphide oxidoreductase, class I, active site (IPR012999), FAD-dependent pyridine nucleotide-disulphide oxidoreductase (IPR013027), FAD/NAD-linked reductase, dimerisation (IPR016156…
1052	Os01t0338000-01	Similar to GTP-binding protein SAR1A.	chr01	13286103	13288360	+	Biological Process: intracellular protein transport (GO:0006886), Cellular Component: intracellular (GO:0005622), Molecular Function: GTP binding (GO:0005525)	Small GTP-binding protein domain (IPR005225), Small GTPase superfamily, SAR1-type (IPR006687), Small GTPase superfamily, ARF/SAR type (IPR006689)
1053	Os01t0338000-02	Similar to GTP-binding protein SAR1A.	chr01	13286240	13288444	+	Biological Process: intracellular protein transport (GO:0006886), Cellular Component: intracellular (GO:0005622), Molecular Function: GTP binding (GO:0005525)	Small GTP-binding protein domain (IPR005225), Small GTPase superfamily, SAR1-type (IPR006687), Small GTPase superfamily, ARF/SAR type (IPR006689)
1054	Os01t0338150-01	Hypothetical gene.	chr01	13291338	13294921	-
1055	Os01t0338100-00	Similar to Transcription initiation factor IID, 18kD subunit family protein.	chr01	13291658	13294473	+	Biological Process: transcription from RNA polymerase II promoter (GO:0006366), Molecular Function: DNA binding (GO:0003677)	Transcription initiation factor IID, 18kDa subunit (IPR003195), Histone-fold (IPR009072)
1056	Os01t0338200-01	Mov34/MPN/PAD-1 family protein.	chr01	13296370	13305252	+	Molecular Function: protein binding (GO:0005515)	Mov34/MPN/PAD-1 (IPR000555)
1057	Os01t0338401-01	Hypothetical gene.	chr01	13311601	13317220	-
1058	Os01t0338600-01	Similar to cysteine sulfinate desulfinase/cysteine desulfurase and related enzymes.	chr01	13319295	13323798	-
1059	Os01t0339001-00	Non-protein coding transcript.	chr01	13321102	13321852	+
1060	Os01t0339400-00	Conserved hypothetical protein.	chr01	13342128	13342490	+
1061	Os01t0339500-01	Similar to No apical meristem protein.	chr01	13342969	13345864	-
1062	Os01t0339600-01	Proteasome assembly chaperone 3 domain containing protein.	chr01	13344958	13348414	+		Proteasome assembly chaperone 3 (IPR018788)
1063	Os01t0339851-01	Conserved hypothetical protein.	chr01	13350181	13350781	+
1064	Os01t0339900-01	Thioredoxin domain 2 containing protein.	chr01	13353629	13357499	+	Biological Process: glycerol ether metabolic process (GO:0006662), Biological Process: cell redox homeostasis (GO:0045454), Cellular Component: endoplasmic reticulum (GO:0005783), Molecular Function: electron carrier activity (GO:0009055), Molecular Function: protein disulfide oxidoreductase activity (GO:0015035), Molecular Function: isomerase activity (GO:0016853)	Thioredoxin (IPR005746), Disulphide isomerase (IPR005788), Endoplasmic reticulum, protein ERp29, C-terminal (IPR011679), Thioredoxin-like fold (IPR012336), Thioredoxin domain (IPR013766), Thioredoxin, conserved site (IPR017937)
1065	Os01t0339950-01	Non-protein coding transcript.	chr01	13355416	13358592	-
1066	Os01t0340100-00	Transcription factor, MADS-box domain containing protein.	chr01	13363638	13364930	+	Molecular Function: DNA binding (GO:0003677), Molecular Function: protein dimerization activity (GO:0046983)	Transcription factor, MADS-box (IPR002100)
1067	Os01t0340400-00	Transcription factor, MADS-box domain containing protein.	chr01	13373620	13374471	+	Molecular Function: DNA binding (GO:0003677), Molecular Function: protein dimerization activity (GO:0046983)	Transcription factor, MADS-box (IPR002100)
1068	Os01t0340600-00	Conserved hypothetical protein.	chr01	13396264	13397109	-
1069	Os01t0340801-01	Non-protein coding transcript.	chr01	13397235	13401925	+
1070	Os01t0341000-00	Conserved hypothetical protein.	chr01	13422910	13424625	-
1071	Os01t0341200-01	Tubulin, conserved site domain containing protein.	chr01	13437009	13438567	-
1072	Os01t0341300-01	Conserved hypothetical protein.	chr01	13442503	13443528	+
1073	Os01t0341750-00	Hypothetical protein.	chr01	13487892	13506871	-
1074	Os01t0342500-00	Hypothetical conserved gene.	chr01	13508323	13508882	-
1075	Os01t0342750-01	Hypothetical conserved gene.	chr01	13524554	13528480	+	Cellular Component: membrane (GO:0016020), Molecular Function: nucleotide binding (GO:0000166), Molecular Function: ATP binding (GO:0005524), Molecular Function: ATPase activity (GO:0016887), Molecular Function: nucleoside-triphosphatase activity (GO:0017111)	ABC transporter-like (IPR003439), ATPase, AAA+ type, core (IPR003593), ABC-2 type transporter (IPR013525), Plant PDR ABC transporter associated (IPR013581)
1076	Os01t0342800-01	Similar to UPF0631 protein.	chr01	13531040	13531777	-
1077	Os01t0342900-01	Similar to Adenosine monophosphate binding protein 1 AMPBP1.	chr01	13539772	13541921	+	Biological Process: metabolic process (GO:0008152), Molecular Function: catalytic activity (GO:0003824)	AMP-dependent synthetase/ligase (IPR000873), AMP-binding, conserved site (IPR020845)
1078	Os01t0343001-00	Hypothetical gene.	chr01	13540185	13541690	-
1079	Os01t0343100-01	Protein of unknown function DUF594 family protein.	chr01	13550372	13556984	+		Protein of unknown function DUF594 (IPR007658)
1080	Os01t0343200-01	Similar to Importin alpha-1b subunit.	chr01	13560832	13566870	+	Biological Process: protein import into nucleus (GO:0006606), Biological Process: intracellular protein transport (GO:0006886), Cellular Component: nucleus (GO:0005634), Cellular Component: cytoplasm (GO:0005737), Molecular Function: binding (GO:0005488), Molecular Function: protein binding (GO:0005515), Molecular Function: protein transporter activity (GO:0008565)	Armadillo (IPR000225), Importin-alpha, importin-beta-binding domain (IPR002652), Armadillo-like helical (IPR011989), Armadillo-type fold (IPR016024)
1081	Os01t0343200-02	AT-IMP (Arabidopsis thaliana importin alpha); protein transporter.	chr01	13565773	13566871	+	Molecular Function: binding (GO:0005488), Molecular Function: protein binding (GO:0005515)	Armadillo (IPR000225), Armadillo-like helical (IPR011989), Armadillo-type fold (IPR016024)
1082	Os01t0343300-01	GATA transcription factor, Tolerance to abiotic stresses (salinity, drought, and ABA), Seed development	chr01	13570702	13573119	+	Biological Process: regulation of transcription, DNA-templated (GO:0006355), Molecular Function: zinc ion binding (GO:0008270), Molecular Function: sequence-specific DNA binding (GO:0043565)	Zinc finger, NHR/GATA-type (IPR013088), Zinc finger, GATA-type (IPR000679)
1083	Os01t0343350-00	Hypothetical protein.	chr01	13572351	13572654	-
1084	Os01t0343400-00	Conserved hypothetical protein.	chr01	13580715	13581665	+
1085	Os01t0343500-01	Similar to TPR repeat.	chr01	13582038	13584915	-
1086	Os01t0343780-00	Hypothetical gene.	chr01	13584186	13584856	+
1087	Os01t0344620-01	Hypothetical gene.	chr01	13608184	13614290	-
1088	Os01t0346400-01	Conserved hypothetical protein.	chr01	13642909	13644537	-
1089	Os01t0346250-00	Conserved hypothetical protein.	chr01	13770746	13772078	+
1090	Os01t0346600-01	Conserved hypothetical protein.	chr01	13775186	13776654	+
1091	Os01t0346700-01	Conserved hypothetical protein.	chr01	13778764	13779786	-
1092	Os01t0346900-01	Nuclear factor-Y transcription factor, Regulation of grain size and shape	chr01	13788467	13789890	+	Molecular Function: DNA binding (GO:0003677), Molecular Function: protein heterodimerization activity (GO:0046982), Cellular Component: nucleosome (GO:0000786)	Histone-fold (IPR009072), Histone H2A/H2B/H3 (IPR007125)
1093	Os01t0347000-01	Similar to PROPYZAMIDE-HTPERSENSITIVE 1.	chr01	13794854	13799906	+	Biological Process: protein dephosphorylation (GO:0006470), Biological Process: dephosphorylation (GO:0016311), Cellular Component: intracellular (GO:0005622), Molecular Function: protein tyrosine phosphatase activity (GO:0004725), Molecular Function: protein tyrosine/serine/threonine phosphatase activity (GO:0008138), Molecular Function: zinc ion binding (GO:0008270), Molecular Function: transfe…	Dual specificity phosphatase, catalytic domain (IPR000340), Protein-tyrosine/Dual-specificity phosphatase (IPR000387), Phosphatidylinositol 3-/4-kinase, catalytic (IPR000403), Protein kinase-like domain (IPR011009), Actin-fragmin kinase, catalytic (IPR015275), Zinc finger, C2H2-like (IPR015880), Protein-tyrosine phosphatase, active site (IPR016130), Dual specificity phosphatase, subgroup, catalyt…
1094	Os01t0347100-01	Protein of unknown function DUF1399 family protein.	chr01	13799955	13804764	-		Protein of unknown function DUF1399 (IPR009836)
1095	Os01t0347150-00	Non-protein coding transcript.	chr01	13803508	13804502	+
1096	Os01t0347200-01	Conserved hypothetical protein.	chr01	13807525	13809820	-
1097	Os01t0347300-01	Conserved hypothetical protein.	chr01	13815140	13817056	+
1098	Os01t0347500-00	Similar to Papain-like cysteine proteinase (Fragment).	chr01	13838790	13839085	-	Molecular Function: cysteine-type peptidase activity (GO:0008234)	Peptidase C1A, papain (IPR013128), Proteinase inhibitor I29, cathepsin propeptide (IPR013201)
1099	Os01t0347600-01	Ervatamin B (EC 3.4.22.-) (ERV-B).	chr01	13842272	13843744	+	Biological Process: proteolysis (GO:0006508), Molecular Function: cysteine-type endopeptidase activity (GO:0004197), Molecular Function: cysteine-type peptidase activity (GO:0008234)	Peptidase, cysteine peptidase active site (IPR000169), Peptidase C1A, papain C-terminal (IPR000668), Peptidase C1A, papain (IPR013128), Proteinase inhibitor I29, cathepsin propeptide (IPR013201)
1100	Os01t0348000-00	Similar to Papain-like cysteine proteinase (Fragment).	chr01	13859456	13859751	+	Molecular Function: cysteine-type peptidase activity (GO:0008234)	Peptidase C1A, papain (IPR013128), Proteinase inhibitor I29, cathepsin propeptide (IPR013201)
1101	Os01t0348600-01	Similar to MFP2 (Fatty acid multifunctional protein) (AtMFP2).	chr01	13887272	13893148	+	Biological Process: fatty acid metabolic process (GO:0006631), Biological Process: metabolic process (GO:0008152), Biological Process: oxidation-reduction process (GO:0055114), Molecular Function: nucleotide binding (GO:0000166), Molecular Function: catalytic activity (GO:0003824), Molecular Function: 3-hydroxyacyl-CoA dehydrogenase activity (GO:0003857), Molecular Function: oxidoreductase activi…	Crotonase, core (IPR001753), 3-hydroxyacyl-CoA dehydrogenase, C-terminal (IPR006108), 3-hydroxyacyl-CoA dehydrogenase, NAD binding (IPR006176), 3-hydroxyacyl-CoA dehydrogenase, conserved site (IPR006180), 6-phosphogluconate dehydrogenase, C-terminal-like (IPR008927), Dehydrogenase, multihelical (IPR013328), NAD(P)-binding domain (IPR016040), Enoyl-CoA hydratase/isomerase, conserved site (IPR01837…
1102	Os01t0348600-02	Similar to glyoxysomal fatty acid beta-oxidation multifunctional protein MFP-a.	chr01	13890929	13893151	+	Biological Process: fatty acid metabolic process (GO:0006631), Biological Process: oxidation-reduction process (GO:0055114), Molecular Function: nucleotide binding (GO:0000166), Molecular Function: 3-hydroxyacyl-CoA dehydrogenase activity (GO:0003857), Molecular Function: oxidoreductase activity (GO:0016491), Molecular Function: oxidoreductase activity, acting on the CH-OH group of donors, NAD or…	3-hydroxyacyl-CoA dehydrogenase, C-terminal (IPR006108), 3-hydroxyacyl-CoA dehydrogenase, NAD binding (IPR006176), 3-hydroxyacyl-CoA dehydrogenase, conserved site (IPR006180), 6-phosphogluconate dehydrogenase, C-terminal-like (IPR008927), Dehydrogenase, multihelical (IPR013328), NAD(P)-binding domain (IPR016040)
1103	Os01t0348600-03	Similar to glyoxysomal fatty acid beta-oxidation multifunctional protein MFP-a.	chr01	13891243	13893184	+	Biological Process: fatty acid metabolic process (GO:0006631), Biological Process: oxidation-reduction process (GO:0055114), Molecular Function: 3-hydroxyacyl-CoA dehydrogenase activity (GO:0003857), Molecular Function: oxidoreductase activity (GO:0016491), Molecular Function: oxidoreductase activity, acting on the CH-OH group of donors, NAD or NADP as acceptor (GO:0016616), Molecular Function: c…	3-hydroxyacyl-CoA dehydrogenase, C-terminal (IPR006108), 6-phosphogluconate dehydrogenase, C-terminal-like (IPR008927), Dehydrogenase, multihelical (IPR013328)
1104	Os01t0348700-01	Similar to 60S ribosomal protein L23a (L25).	chr01	13896299	13898120	+	Biological Process: translation (GO:0006412), Cellular Component: intracellular (GO:0005622), Cellular Component: ribosome (GO:0005840), Molecular Function: nucleotide binding (GO:0000166), Molecular Function: RNA binding (GO:0003723), Molecular Function: structural constituent of ribosome (GO:0003735)	Ribosomal protein L23/L25, conserved site (IPR001014), Ribosomal protein L23/L25, N-terminal (IPR005633), Nucleotide-binding, alpha-beta plait (IPR012677), Ribosomal protein L23/L15e (IPR012678), Ribosomal protein L25/L23 (IPR013025), Ribosomal protein L23 (IPR019985)
1105	Os01t0348800-01	Similar to Salt-stress induced protein (Salt protein).	chr01	13899523	13900729	-		Mannose-binding lectin (IPR001229)
1106	Os01t0348900-01	Jacalin-related mannose-binding lectin, Salinity tolerance, Resistance to M. oryzae	chr01	13903285	13904626	-	Molecular Function: carbohydrate binding (GO:0030246)	Jacalin-like lectin domain superfamily (IPR036404), Jacalin-like lectin domain (IPR001229), Jacalin-like lectin domain, plant (IPR033734)
1107	Os01t0349000-01	Conserved hypothetical protein.	chr01	13911234	13912822	-
1108	Os01t0349400-01	Similar to Serine/threonine protein phosphatase PP1 (EC 3.1.3.16) (Fragment).	chr01	13922501	13927453	-
1109	Os01t0349600-01	Hypothetical protein.	chr01	13934496	13935854	+
1110	Os01t0349800-01	Similar to Cytochrome P450.	chr01	13941318	13944605	+	Biological Process: oxidation-reduction process (GO:0055114), Molecular Function: iron ion binding (GO:0005506), Molecular Function: electron carrier activity (GO:0009055), Molecular Function: oxidoreductase activity, acting on paired donors, with incorporation or reduction of molecular oxygen (GO:0016705), Molecular Function: heme binding (GO:0020037)	Cytochrome P450 (IPR001128), Cytochrome P450, E-class, group I (IPR002401), Cytochrome P450, conserved site (IPR017972)
1111	Os01t0350000-01	Transferase family protein.	chr01	13957514	13959224	+	Molecular Function: transferase activity, transferring acyl groups other than amino-acyl groups (GO:0016747)	Transferase (IPR003480), Chloramphenicol acetyltransferase-like domain (IPR023213)
1112	Os01t0350100-00	Hypothetical protein.	chr01	13978048	13979525	-
1113	Os01t0350300-00	Disease resistance protein domain containing protein.	chr01	13980666	13983744	-	Biological Process: defense response (GO:0006952), Molecular Function: ADP binding (GO:0043531)	Disease resistance protein (IPR000767), NB-ARC (IPR002182)
1114	Os01t0350500-01	Similar to H0124B04.7 protein.	chr01	13986495	13988740	-
1115	Os01t0350900-02	RING-finger E3 ligase, Regulation of plant architecture	chr01	14012515	14019465	+		Zinc finger, RING/FYVE/PHD-type (IPR013083), Zinc finger, RING-type (IPR001841)
1116	Os01t0350900-01	Similar to VIP2 protein.	chr01	14012517	14019436	+	Molecular Function: protein binding (GO:0005515), Molecular Function: zinc ion binding (GO:0008270)	Zinc finger, RING-type (IPR001841), Zinc finger, RING/FYVE/PHD-type (IPR013083), Zinc finger, C3HC4 RING-type (IPR018957)
1117	Os01t0351100-00	Similar to Poly.	chr01	14036461	14040808	+	Biological Process: protein ADP-ribosylation (GO:0006471), Molecular Function: NAD+ ADP-ribosyltransferase activity (GO:0003950)	Poly(ADP-ribose) polymerase, regulatory domain (IPR004102), Poly(ADP-ribose) polymerase, catalytic domain (IPR012317)
1118	Os01t0351200-00	Similar to Poly.	chr01	14047844	14054909	+	Biological Process: protein ADP-ribosylation (GO:0006471), Molecular Function: nucleic acid binding (GO:0003676), Molecular Function: NAD+ ADP-ribosyltransferase activity (GO:0003950)	DNA-binding SAP (IPR003034), Poly(ADP-ribose) polymerase, regulatory domain (IPR004102), WGR domain (IPR008893), Poly(ADP-ribose) polymerase, catalytic domain (IPR012317)
1119	Os01t0351300-01	Exocyst complex subunit Sec15-like family protein.	chr01	14059603	14064199	+	Biological Process: vesicle docking involved in exocytosis (GO:0006904), Cellular Component: exocyst (GO:0000145)	Exocyst complex subunit Sec15-like (IPR007225)
1120	Os01t0351500-00	Plant disease resistance response protein domain containing protein.	chr01	14068832	14069563	-		Plant disease resistance response protein (IPR004265)
1121	Os01t0351800-01	2OG-Fe(II) oxygenase domain containing protein.	chr01	14077661	14080700	+	Biological Process: oxidation-reduction process (GO:0055114), Molecular Function: oxidoreductase activity (GO:0016491), Molecular Function: oxidoreductase activity, acting on paired donors, with incorporation or reduction of molecular oxygen, 2-oxoglutarate as one donor, and incorporation of one atom each of oxygen into both donors (GO:0016706)	Oxoglutarate/iron-dependent oxygenase (IPR005123)
1122	Os01t0352100-01	2OG-Fe(II) oxygenase domain containing protein.	chr01	14101994	14108083	+	Biological Process: oxidation-reduction process (GO:0055114), Molecular Function: oxidoreductase activity (GO:0016491), Molecular Function: oxidoreductase activity, acting on paired donors, with incorporation or reduction of molecular oxygen, 2-oxoglutarate as one donor, and incorporation of one atom each of oxygen into both donors (GO:0016706)	Oxoglutarate/iron-dependent oxygenase (IPR005123)
1123	Os01t0352200-00	Hypothetical protein.	chr01	14102045	14102764	-
1124	Os01t0352751-00	Non-protein coding transcript.	chr01	14144925	14145049	+
1125	Os01t0353400-00	Similar to Glutathione S-transferase GST 8 (EC 2.5.1.18).	chr01	14167662	14168570	+	Molecular Function: protein binding (GO:0005515)	Glutathione S-transferase, N-terminal (IPR004045), Glutathione S-transferase, C-terminal (IPR004046), Glutathione S-transferase, C-terminal-like (IPR010987), Thioredoxin-like fold (IPR012336), Glutathione S-transferase/chloride channel, C-terminal (IPR017933)
1126	Os01t0353501-00	Hypothetical protein.	chr01	14167663	14168485	-
1127	Os01t0353600-00	Similar to AP-3 complex subunit sigma-2.	chr01	14171226	14175788	+	Biological Process: transport (GO:0006810), Biological Process: protein transport (GO:0015031), Molecular Function: protein transporter activity (GO:0008565)	Longin-like (IPR011012), Adaptor protein complex, sigma subunit (IPR016635), AP complex, mu/sigma subunit (IPR022775)
1128	Os01t0353633-00	Similar to OSIGBa0157K09-H0214G12.6 protein.	chr01	14174019	14174501	-		DNA-binding pseudobarrel domain (IPR015300)
1129	Os01t0353900-01	Similar to cDNA clone:J023055K12, full insert sequence.	chr01	14197332	14199513	+
1130	Os01t0353900-02	Conserved hypothetical protein.	chr01	14197353	14199153	+
1131	Os01t0354175-00	Hypothetical protein.	chr01	14224319	14224915	+
1132	Os01t0354200-01	Similar to Sterol C-14 reductase.	chr01	14224921	14233645	-	Cellular Component: membrane (GO:0016020)	Ergosterol biosynthesis ERG4/ERG24 (IPR001171)
1133	Os01t0354450-00	Similar to ATP binding protein.	chr01	14229224	14230079	-
1134	Os01t0354700-00	Pre-mRNA cleavage complex II Clp1 domain containing protein.	chr01	14252929	14256623	+		Pre-mRNA cleavage complex II Clp1 (IPR010655)
1135	Os01t0355100-01	Pentatricopeptide repeat domain containing protein.	chr01	14264078	14267208	+	Molecular Function: binding (GO:0005488)	Pentatricopeptide repeat (IPR002885), Tetratricopeptide-like helical (IPR011990)
1136	Os01t0355175-00	Hypothetical protein.	chr01	14264762	14267043	-
1137	Os01t0355250-00	Similar to Salt stress-induced protein.	chr01	14280966	14282033	+		Mannose-binding lectin (IPR001229)
1138	Os01t0355400-01	Similar to BPM3; protein binding.	chr01	14290376	14290915	+	Molecular Function: protein binding (GO:0005515)	MATH (IPR002083), TRAF-like (IPR008974)
1139	Os01t0355500-02	Heat shock protein DnaJ, N-terminal domain containing protein.	chr01	14292115	14303170	-	Molecular Function: heat shock protein binding (GO:0031072)	Heat shock protein DnaJ, N-terminal (IPR001623)
1140	Os01t0355500-01	Hypothetical conserved gene.	chr01	14300041	14303191	-
1141	Os01t0355600-01	Galactose-binding like domain containing protein.	chr01	14308159	14316509	+
1142	Os01t0355700-00	NB-ARC domain containing protein.	chr01	14318283	14319789	-	Molecular Function: ADP binding (GO:0043531)	NB-ARC (IPR002182)
1143	Os01t0355800-00	Similar to Esterase PIR7A.	chr01	14326183	14327100	+
1144	Os01t0355900-01	Peptidase C48, SUMO/Sentrin/Ubl1 family protein.	chr01	14328827	14333206	-	Biological Process: proteolysis (GO:0006508), Molecular Function: cysteine-type peptidase activity (GO:0008234)	Peptidase C48, SUMO/Sentrin/Ubl1 (IPR003653)
1145	Os01t0356400-01	Similar to multidrug resistance protein ABC transporter family.	chr01	14340326	14357449	-	Biological Process: transport (GO:0006810), Biological Process: transmembrane transport (GO:0055085), Cellular Component: integral to membrane (GO:0016021), Molecular Function: nucleotide binding (GO:0000166), Molecular Function: ATP binding (GO:0005524), Molecular Function: ATPase activity (GO:0016887), Molecular Function: nucleoside-triphosphatase activity (GO:0017111), Molecular Function: ATPa…	ABC transporter, transmembrane domain (IPR001140), ABC transporter-like (IPR003439), ATPase, AAA+ type, core (IPR003593), ABC transporter, transmembrane domain, type 1 (IPR011527), ABC transporter, conserved site (IPR017871), ABC transporter, integral membrane type 1 (IPR017940)
1146	Os01t0356450-00	Non-protein coding transcript.	chr01	14377090	14377957	-
1147	Os01t0356500-01	Thiamin pyrophosphokinase, eukaryotic domain containing protein.	chr01	14391999	14398598	-	Biological Process: thiamine metabolic process (GO:0006772), Biological Process: thiamine diphosphate biosynthetic process (GO:0009229), Molecular Function: thiamine diphosphokinase activity (GO:0004788), Molecular Function: ATP binding (GO:0005524)	Thiamin pyrophosphokinase (IPR006282), Thiamin pyrophosphokinase, catalytic domain (IPR007371), Thiamin pyrophosphokinase, vitamin B1-binding domain (IPR007373), Thiamin pyrophosphokinase, eukaryotic (IPR016966)
1148	Os01t0356800-00	Domain of unknown function DUF3406, chloroplast translocase domain containing protein.	chr01	14414670	14435665	+		Domain of unknown function DUF3406, chloroplast translocase (IPR024283)
1149	Os01t0356900-01	Similar to Extensin-like protein.	chr01	14437890	14439688	-
1150	Os01t0356951-01	Putative long noncoding RNA, Regulation of panicle architecture	chr01	14444478	14445110	+
1151	Os01t0357100-01	Ferredoxin-nitrite reductase, Nitrate reduction (assimilation), Determination of regeneration ability	chr01	14446913	14453453	+	Biological Process: oxidation-reduction process (GO:0055114), Molecular Function: oxidoreductase activity (GO:0016491), Molecular Function: heme binding (GO:0020037), Molecular Function: iron-sulfur cluster binding (GO:0051536)	Nitrite/Sulfite reductase ferredoxin-like domain (IPR005117), Nitrite/sulphite reductase 4Fe-4S domain (IPR006067), Nitrite/sulphite reductase iron-sulphur/sirohaem-binding site (IPR006066)
1152	Os01t0357150-00	Hypothetical protein.	chr01	14447341	14453462	-
1153	Os01t0357100-02	Similar to Ferredoxin-nitrite reductase.	chr01	14447371	14453454	+	Biological Process: oxidation-reduction process (GO:0055114), Molecular Function: oxidoreductase activity (GO:0016491), Molecular Function: heme binding (GO:0020037), Molecular Function: iron-sulfur cluster binding (GO:0051536)	Nitrite/sulphite reductase, hemoprotein beta-component, ferrodoxin-like (IPR005117), Nitrite/sulphite reductase iron-sulphur/siroheam-binding site (IPR006066), Nitrite/sulphite reductase 4Fe-4S domain (IPR006067)
1154	Os01t0357200-01	Sterol-binding domain containing protein.	chr01	14453690	14454549	+	Molecular Function: sterol binding (GO:0032934)	SCP2 sterol-binding domain (IPR003033)
1155	Os01t0357400-01	Similar to Alpha-amylase.	chr01	14459951	14461690	+
1156	Os01t0357500-00	Similar to Ferredoxin-nitrite reductase.	chr01	14462311	14462787	+
1157	Os01t0357800-01	Pentatricopeptide repeat domain containing protein.	chr01	14471243	14476738	+	Molecular Function: binding (GO:0005488)	Pentatricopeptide repeat (IPR002885), Tetratricopeptide-like helical (IPR011990)
1158	Os01t0357900-01	Similar to RALF.	chr01	14480825	14481553	-		Rapid ALkalinization Factor (IPR008801)
1159	Os01t0358100-01	Rapid ALkalinization Factor family protein.	chr01	14486394	14487138	-		Rapid ALkalinization Factor (IPR008801)
1160	Os01t0358300-03	Non-protein coding transcript.	chr01	14506676	14506960	-
1161	Os01t0358300-01	Tetratricopeptide-like helical domain containing protein.	chr01	14506819	14513133	-	Molecular Function: binding (GO:0005488), Molecular Function: protein binding (GO:0005515)	Tetratricopeptide TPR-1 (IPR001440), Tetratricopeptide-like helical (IPR011990), Tetratricopeptide repeat-containing (IPR013026), Tetratricopeptide repeat (IPR019734), Protein of unknown function DUF3493 (IPR021883)
1162	Os01t0358400-01	Similar to 40S ribosomal protein S4.	chr01	14513332	14515250	+	Biological Process: translation (GO:0006412), Cellular Component: intracellular (GO:0005622), Cellular Component: ribosome (GO:0005840), Molecular Function: RNA binding (GO:0003723), Molecular Function: structural constituent of ribosome (GO:0003735)	Ribosomal protein S4e (IPR000876), RNA-binding S4 (IPR002942), KOW (IPR005824), Ribosomal protein S4e, N-terminal (IPR013843), Ribosomal protein S4e, central (IPR013845), Ribosomal protein S4e, N-terminal, conserved site (IPR018199)
1163	Os01t0358551-00	Conserved hypothetical protein.	chr01	14513995	14515154	-
1164	Os01t0358700-01	Similar to Powdery mildew resistance protein PM3b.	chr01	14529887	14531604	-	Biological Process: defense response (GO:0006952), Molecular Function: ADP binding (GO:0043531)	Disease resistance protein (IPR000767), NB-ARC (IPR002182)
1165	Os01t0358800-00	Similar to N-acetyltransferase.	chr01	14544114	14544749	+		Acyl-CoA N-acyltransferase (IPR016181)
1166	Os01t0358900-00	Similar to GDHB glutamate dehydrogenase.	chr01	14545123	14545507	-	Molecular Function: nucleotide binding (GO:0000166)	NAD(P)-binding domain (IPR016040)
1167	Os01t0359400-03	NB-ARC domain containing protein.	chr01	14576601	14581193	-	Biological Process: defense response (GO:0006952), Molecular Function: ADP binding (GO:0043531)	Disease resistance protein (IPR000767), NB-ARC (IPR002182)
1168	Os01t0359400-02	NB-ARC domain containing protein.	chr01	14577199	14581193	-	Biological Process: defense response (GO:0006952), Molecular Function: ADP binding (GO:0043531)	Disease resistance protein (IPR000767), NB-ARC (IPR002182)
1169	Os01t0359400-01	NB-ARC domain containing protein.	chr01	14579512	14581963	-	Biological Process: defense response (GO:0006952), Molecular Function: ADP binding (GO:0043531)	Disease resistance protein (IPR000767), NB-ARC (IPR002182)
1170	Os01t0359600-00	Disease resistance protein domain containing protein.	chr01	14587756	14591782	-	Biological Process: defense response (GO:0006952), Molecular Function: protein binding (GO:0005515), Molecular Function: ADP binding (GO:0043531)	Disease resistance protein (IPR000767), Leucine-rich repeat (IPR001611), NB-ARC (IPR002182)
1171	Os01t0359800-00	Similar to NB-ARC domain containing protein.	chr01	14599119	14603058	-	Biological Process: defense response (GO:0006952), Molecular Function: protein binding (GO:0005515), Molecular Function: ADP binding (GO:0043531)	Disease resistance protein (IPR000767), Leucine-rich repeat (IPR001611), NB-ARC (IPR002182)
1172	Os01t0360100-01	Similar to Powdery mildew resistance protein pm3f (Fragment).	chr01	14608644	14613681	-
1173	Os01t0360150-01	Hypothetical protein.	chr01	14611322	14611896	+
1174	Os01t0360200-03	Similar to Respiratory burst oxidase homolog.	chr01	14621368	14626628	-	Biological Process: oxidation-reduction process (GO:0055114), Cellular Component: membrane (GO:0016020), Cellular Component: integral to membrane (GO:0016021), Molecular Function: peroxidase activity (GO:0004601), Molecular Function: iron ion binding (GO:0005506), Molecular Function: calcium ion binding (GO:0005509), Molecular Function: electron carrier activity (GO:0009055), Molecular Function: …	Cytochrome b245, heavy chain (IPR000778), EF-hand-like domain (IPR011992), FAD-binding 8 (IPR013112), Ferric reductase, NAD binding (IPR013121), Flavoprotein transmembrane component (IPR013130), NADPH oxidase Respiratory burst (IPR013623), Ferredoxin reductase-type FAD-binding domain (IPR017927), Riboflavin synthase-like beta-barrel (IPR017938), EF-Hand 1, calcium-binding site (IPR018247), EF-HAN…
1175	Os01t0360200-01	Similar to Respiratory burst oxidase homolog.	chr01	14621511	14627934	-	Biological Process: oxidation-reduction process (GO:0055114), Cellular Component: membrane (GO:0016020), Cellular Component: integral to membrane (GO:0016021), Molecular Function: peroxidase activity (GO:0004601), Molecular Function: iron ion binding (GO:0005506), Molecular Function: calcium ion binding (GO:0005509), Molecular Function: electron carrier activity (GO:0009055), Molecular Function: …	Cytochrome b245, heavy chain (IPR000778), EF-hand-like domain (IPR011992), FAD-binding 8 (IPR013112), Ferric reductase, NAD binding (IPR013121), Flavoprotein transmembrane component (IPR013130), NADPH oxidase Respiratory burst (IPR013623), Ferredoxin reductase-type FAD-binding domain (IPR017927), Riboflavin synthase-like beta-barrel (IPR017938), EF-Hand 1, calcium-binding site (IPR018247), EF-HAN…
1176	Os01t0360333-00	Hypothetical protein.	chr01	14621567	14626552	+
1177	Os01t0360600-01	Dephospho-CoA kinase family protein.	chr01	14679306	14683391	-	Biological Process: coenzyme A biosynthetic process (GO:0015937), Molecular Function: dephospho-CoA kinase activity (GO:0004140), Molecular Function: ATP binding (GO:0005524)	Dephospho-CoA kinase (IPR001977)
1178	Os01t0361000-02	Conserved hypothetical protein.	chr01	14702436	14705973	-
1179	Os01t0361000-01	Conserved hypothetical protein.	chr01	14705121	14705998	-
1180	Os01t0361500-01	Phospholipid/glycerol acyltransferase domain containing protein.	chr01	14732018	14738430	-	Biological Process: metabolic process (GO:0008152), Molecular Function: transferase activity, transferring acyl groups (GO:0016746), Molecular Function: transferase activity, transferring acyl groups other than amino-acyl groups (GO:0016747)	Phospholipid/glycerol acyltransferase (IPR002123), Diacylglycerol acyltransferase (IPR007130)
1181	Os01t0361700-01	Conserved hypothetical protein.	chr01	14742684	14743148	-
1182	Os01t0361800-01	Hypothetical conserved gene.	chr01	14744917	14747063	+
1183	Os01t0361800-02	Hypothetical protein.	chr01	14744918	14748525	+
1184	Os01t0362000-01	Conserved hypothetical protein.	chr01	14752203	14754630	+
1185	Os01t0362100-01	Esterase/lipase/thioesterase domain containing protein.	chr01	14754835	14764507	-	Molecular Function: transferase activity, transferring acyl groups other than amino-acyl groups (GO:0016747)	Diacylglycerol acyltransferase (IPR007130)
1186	Os01t0362400-01	Conserved hypothetical protein.	chr01	14769271	14769881	+
1187	Os01t0362533-01	Conserved hypothetical protein.	chr01	14770806	14771426	+
1188	Os01t0362800-01	Conserved hypothetical protein.	chr01	14783393	14785500	-
1189	Os01t0363000-01	Hypothetical protein.	chr01	14789737	14790461	+
1190	Os01t0363300-01	Uncharacterised protein family UPF0497, trans-membrane plant subgroup domain containing protein.	chr01	14793093	14797044	+		Uncharacterised protein family UPF0497, trans-membrane plant subgroup (IPR006459), Uncharacterised protein family UPF0497, trans-membrane plant (IPR006702)
1191	Os01t0363300-02	Uncharacterised protein family UPF0497, trans-membrane plant subgroup domain containing protein.	chr01	14793151	14797054	+		Uncharacterised protein family UPF0497, trans-membrane plant subgroup (IPR006459), Uncharacterised protein family UPF0497, trans-membrane plant (IPR006702)
1192	Os01t0363500-01	Similar to predicted protein.	chr01	14798822	14801946	+
1193	Os01t0363500-02	Similar to PAP fibrillin domain containing protein,expressed.	chr01	14798851	14801292	+
1194	Os01t0363500-03	Conserved hypothetical protein.	chr01	14798852	14803608	+
1195	Os01t0363500-04	Similar to PAP fibrillin domain containing protein,expressed.	chr01	14798871	14801247	+
1196	Os01t0363500-05	Similar to predicted protein.	chr01	14798988	14801923	+
1197	Os01t0363600-01	Similar to hydroxyethylthiazole kinase family protein.	chr01	14802807	14804515	-	Biological Process: thiamine biosynthetic process (GO:0009228), Molecular Function: hydroxyethylthiazole kinase activity (GO:0004417)	Hydroxyethylthiazole kinase (IPR000417)
1198	Os01t0363900-01	Ortholog of Arabidopsis HASTY (HST) and human exportin-5 (XPO5), Xpo1 domain protein, Regulation of miRNA accumulation and crown root development	chr01	14809676	14821941	+		Armadillo-type fold (IPR016024), Exportin-1/Importin-beta-like (IPR013598)
1199	Os01t0363950-00	Hypothetical gene.	chr01	14810002	14812108	-
1200	Os01t0364000-02	Hypothetical gene.	chr01	14823230	14825145	-
1201	Os01t0364000-01	Hypothetical gene.	chr01	14823243	14825669	-
1202	Os01t0364100-00	Similar to OSIGBa0145M07.8 protein.	chr01	14825133	14828267	+	Biological Process: protein phosphorylation (GO:0006468), Molecular Function: protein kinase activity (GO:0004672), Molecular Function: protein serine/threonine kinase activity (GO:0004674), Molecular Function: calcium ion binding (GO:0005509), Molecular Function: protein binding (GO:0005515), Molecular Function: ATP binding (GO:0005524), Molecular Function: transferase activity, transferring pho…	EGF-type aspartate/asparagine hydroxylation site (IPR000152), Protein kinase, catalytic domain (IPR000719), Epidermal growth factor-like, type 3 (IPR000742), EGF-like calcium-binding (IPR001881), Epidermal growth factor-like (IPR006210), Serine/threonine-protein kinase, active site (IPR008271), Protein kinase-like domain (IPR011009), Protein kinase, ATP binding site (IPR017441), Serine/threonine-…
1203	Os01t0364400-00	Protein kinase, catalytic domain domain containing protein.	chr01	14856256	14878542	-	Biological Process: protein phosphorylation (GO:0006468), Molecular Function: protein kinase activity (GO:0004672), Molecular Function: protein serine/threonine kinase activity (GO:0004674), Molecular Function: protein tyrosine kinase activity (GO:0004713), Molecular Function: calcium ion binding (GO:0005509), Molecular Function: protein binding (GO:0005515), Molecular Function: ATP binding (GO:0…	Protein kinase, catalytic domain (IPR000719), EGF-like calcium-binding (IPR001881), Serine/threonine-protein kinase, catalytic domain (IPR002290), Epidermal growth factor-like (IPR006210), Serine/threonine-protein kinase, active site (IPR008271), Protein kinase-like domain (IPR011009), Concanavalin A-like lectin/glucanase, subgroup (IPR013320), Protein kinase, ATP binding site (IPR017441), Serine…
1204	Os01t0364412-00	Non-protein coding transcript.	chr01	14856428	14858011	+
1205	Os01t0364450-00	Hypothetical gene.	chr01	14879651	14880271	-
1206	Os01t0364800-00	Protein kinase, catalytic domain domain containing protein.	chr01	14892931	14898978	+	Biological Process: protein phosphorylation (GO:0006468), Molecular Function: protein kinase activity (GO:0004672), Molecular Function: protein serine/threonine kinase activity (GO:0004674), Molecular Function: protein tyrosine kinase activity (GO:0004713), Molecular Function: ATP binding (GO:0005524), Molecular Function: transferase activity, transferring phosphorus-containing groups (GO:0016772)	Protein kinase, catalytic domain (IPR000719), Serine/threonine-protein kinase, catalytic domain (IPR002290), Serine/threonine-protein kinase, active site (IPR008271), Protein kinase-like domain (IPR011009), Protein kinase, ATP binding site (IPR017441), Serine/threonine-protein kinase-like domain (IPR017442), Tyrosine-protein kinase, catalytic domain (IPR020635)
1207	Os01t0364900-01	Conserved hypothetical protein.	chr01	14900942	14902670	+
				9929476
		0		9929.48

## Sheet: RM7075 to RM10916
S13 Table. The details of putative candidate genes in the region of pleiotropic QTL
SNO	ID	Description	Chromosome	Start	End	Strand	GO	InterPro
1	Os01t0368500-00	Protein of unknown function DUF679 domain containing protein.	chr01	15099900	15112071	+	NONE	Protein of unknown function DUF679 (IPR007770)
2	Os01t0368600-00	Conserved hypothetical protein.	chr01	15113035	15113731	+	NONE	NONE
3	Os01t0368700-01	Protein of unknown function DUF679 domain containing protein.	chr01	15118693	15119756	+	NONE	Protein of unknown function DUF679 (IPR007770)
4	Os01t0368900-01	Similar to Glutaredoxin-C1.	chr01	15124631	15125396	+	Biological Process: cell redox homeostasis (GO:0045454), Molecular Function: electron carrier activity (GO:0009055), Molecular Function: protein disulfide oxidoreductase activity (GO:0015035)	Glutaredoxin (IPR002109), Glutaredoxin-like, plant II (IPR011905), Thioredoxin-like fold (IPR012336)
5	Os01t0369000-01	Component of cullin-RING E3 ubiquitin ligase (CRL) complex, Salt/drought stress response	chr01	15130898	15139459	-	Biological Process: ubiquitin-dependent protein catabolic process (GO:0006511), Molecular Function: ubiquitin protein ligase binding (GO:0031625), Cellular Component: cullin-RING ubiquitin ligase complex (GO:0031461)	Cullin repeat-like-containing domain superfamily (IPR016159), Cullin homology domain superfamily (IPR036317), Winged helix DNA-binding domain superfamily (IPR036390), Winged helix-like DNA-binding domain superfamily (IPR036388), Cullin, N-terminal (IPR001373), Cullin homology domain (IPR016158), Cullin protein, neddylation domain (IPR019559), Cullin, conserved site (IPR016157)
6	Os01t0369000-02	Similar to Cullin-1.	chr01	15130926	15139408	-	Biological Process: ubiquitin-dependent protein catabolic process (GO:0006511), Cellular Component: cullin-RING ubiquitin ligase complex (GO:0031461), Molecular Function: ubiquitin protein ligase binding (GO:0031625)	Cullin, N-terminal (IPR001373), Winged helix-turn-helix transcription repressor DNA-binding (IPR011991), Cullin, conserved site (IPR016157), Cullin homology (IPR016158), Cullin repeat-like-containing domain (IPR016159), Cullin protein, neddylation domain (IPR019559)
7	Os01t0369200-01	Component of cullin-RING E3 ubiquitin ligase (CRL) complex, Salt/drought stress response, Cold stress response	chr01	15146089	15152275	+	Biological Process: ubiquitin-dependent protein catabolic process (GO:0006511), Molecular Function: ubiquitin protein ligase binding (GO:0031625)	Cullin repeat-like-containing domain superfamily (IPR016159), Cullin homology domain superfamily (IPR036317), Winged helix DNA-binding domain superfamily (IPR036390), Winged helix-like DNA-binding domain superfamily (IPR036388), Cullin, N-terminal (IPR001373), Cullin homology domain (IPR016158), Cullin protein, neddylation domain (IPR019559)
8	Os01t0369300-02	Potassium transporter 1 (AtPOT1) (AtKUP1) (AtKT1). Splice isoform 2.	chr01	15152302	15154886	-	Biological Process: potassium ion transmembrane transport (GO:0071805), Cellular Component: membrane (GO:0016020), Molecular Function: potassium ion transmembrane transporter activity (GO:0015079)	K+ potassium transporter (IPR003855)
9	Os01t0369366-00	Hypothetical protein.	chr01	15152517	15153876	+	NONE	NONE
10	Os01t0369300-01	Potassium uptake protein, kup domain containing protein.	chr01	15153154	15157185	-	Biological Process: potassium ion transmembrane transport (GO:0071805), Cellular Component: membrane (GO:0016020), Molecular Function: potassium ion transmembrane transporter activity (GO:0015079)	K+ potassium transporter (IPR003855)
11	Os01t0369500-01	C2 calcium-dependent membrane targeting domain containing protein.	chr01	15160442	15161605	+	Molecular Function: protein binding (GO:0005515)	C2 calcium-dependent membrane targeting (IPR000008), C2 calcium/lipid-binding domain, CaLB (IPR008973)
12	Os01t0369600-01	Conserved hypothetical protein.	chr01	15161786	15165714	+	NONE	NONE
13	Os01t0369700-03	Similar to Glutathione S-transferase GST 8 (EC 2.5.1.18).	chr01	15170441	15171818	-	Molecular Function: protein binding (GO:0005515)	Glutathione S-transferase, N-terminal (IPR004045), Glutathione S-transferase, C-terminal (IPR004046), Glutathione S-transferase, C-terminal-like (IPR010987), Thioredoxin-like fold (IPR012336), Glutathione S-transferase/chloride channel, C-terminal (IPR017933)
14	Os01t0369700-01	Similar to Glutathione S-transferase GST 8 (EC 2.5.1.18).	chr01	15170486	15171859	-	Molecular Function: protein binding (GO:0005515)	Glutathione S-transferase, N-terminal (IPR004045), Glutathione S-transferase, C-terminal (IPR004046), Glutathione S-transferase, C-terminal-like (IPR010987), Thioredoxin-like fold (IPR012336), Glutathione S-transferase/chloride channel, C-terminal (IPR017933)
15	Os01t0369800-00	Hypothetical protein.	chr01	15170605	15171053	+	NONE	NONE
16	Os01t0369900-01	Similar to 12-oxo-phytodienoic acid reductase6.	chr01	15185168	15188301	-	Biological Process: metabolic process (GO:0008152), Biological Process: oxidation-reduction process (GO:0055114), Molecular Function: catalytic activity (GO:0003824), Molecular Function: FMN binding (GO:0010181), Molecular Function: oxidoreductase activity (GO:0016491)	NADH:flavin oxidoreductase/NADH oxidase, N-terminal (IPR001155), Aldolase-type TIM barrel (IPR013785)
17	Os01t0369950-00	Hypothetical gene.	chr01	15185336	15188091	+	NONE	NONE
18	Os01t0370000-01	NADH:flavin oxidoreductase/NADH oxidase, N-terminal domain containing protein.	chr01	15192860	15195695	-	Biological Process: metabolic process (GO:0008152), Biological Process: oxidation-reduction process (GO:0055114), Molecular Function: catalytic activity (GO:0003824), Molecular Function: FMN binding (GO:0010181), Molecular Function: oxidoreductase activity (GO:0016491)	NADH:flavin oxidoreductase/NADH oxidase, N-terminal (IPR001155), Aldolase-type TIM barrel (IPR013785)
19	Os01t0370200-00	Similar to Glutathione-S-transferase 19E50.	chr01	15216825	15217959	-	Molecular Function: protein binding (GO:0005515)	Glutathione S-transferase, N-terminal (IPR004045), Glutathione S-transferase, C-terminal (IPR004046), Glutathione S-transferase, C-terminal-like (IPR010987), Thioredoxin-like fold (IPR012336), Glutathione S-transferase/chloride channel, C-terminal (IPR017933)
20	Os01t0370400-00	Hypothetical protein.	chr01	15217032	15217959	+	NONE	NONE
21	Os01t0370600-00	Similar to Glutathione transferase.	chr01	15234445	15234693	+	NONE	Glutathione S-transferase, C-terminal (IPR004046), Glutathione S-transferase, C-terminal-like (IPR010987), Glutathione S-transferase/chloride channel, C-terminal (IPR017933)
22	Os01t0370750-01	Non-protein coding transcript.	chr01	15258673	15260303	+	NONE	NONE
23	Os01t0370900-00	Similar to Glutathione transferase.	chr01	15258848	15260219	-	NONE	Glutathione S-transferase, C-terminal (IPR004046), Glutathione S-transferase, C-terminal-like (IPR010987), Glutathione S-transferase/chloride channel, C-terminal (IPR017933)
24	Os01t0371200-01	Similar to Glutathione-S-transferase 19E50.	chr01	15281170	15283073	-	Molecular Function: protein binding (GO:0005515)	Glutathione S-transferase, N-terminal (IPR004045), Glutathione S-transferase, C-terminal (IPR004046), Glutathione S-transferase, C-terminal-like (IPR010987), Thioredoxin-like fold (IPR012336), Glutathione S-transferase/chloride channel, C-terminal (IPR017933)
25	Os01t0371300-00	Hypothetical protein.	chr01	15281380	15282975	+	NONE	NONE
26	Os01t0371400-00	Similar to Glutathione s-transferase gstf2.	chr01	15289214	15291315	+	Molecular Function: protein binding (GO:0005515)	Glutathione S-transferase, N-terminal (IPR004045), Glutathione S-transferase, C-terminal (IPR004046), Glutathione S-transferase, C-terminal-like (IPR010987), Thioredoxin-like fold (IPR012336), Glutathione S-transferase/chloride channel, C-terminal (IPR017933)
27	Os01t0371500-01	Similar to Glutathione-S-transferase 19E50.	chr01	15291669	15294409	+	Molecular Function: protein binding (GO:0005515)	Glutathione S-transferase, N-terminal (IPR004045), Glutathione S-transferase, C-terminal (IPR004046), Glutathione S-transferase, C-terminal-like (IPR010987), Thioredoxin-like fold (IPR012336), Glutathione S-transferase/chloride channel, C-terminal (IPR017933)
				191769
				191.769

## Sheet: RM279 - RM12568
Table S11 The details of putative candidate genes in the region of pleiotropic QTL			S13 Table. The details of putative candidate genes in the region of pleiotropic QTL
SNO	ID	Description	Chromosome	Start	End	Strand	GO	InterPro
1	Os02t0152500-01	Chromatin remodeling factor, Protein containing PHD domain, FNIII domain and VID domain, Positive regulator of flowering, Regulation of leaf angle	chr02	2876561	2882177	-	Molecular Function: protein binding (GO:0005515)	Fibronectin, type III (IPR003961)
2	Os02t0152600-01	Protein of unknown function DUF2343 domain containing protein.	chr02	2898897	2903751	-	NONE	Protein of unknown function DUF2343 (IPR018786)
3	Os02t0152700-01	Similar to DNA-directed RNA polymerase.	chr02	2904358	2906571	-	Biological Process: amine metabolic process (GO:0009308), Molecular Function: copper ion binding (GO:0005507), Molecular Function: quinone binding (GO:0048038)	Copper amine oxidase, N2/N3-terminal (IPR015801), Protein of unknown function DUF3223 (IPR021602)
4	Os02t0152750-00	Non-protein coding transcript.	chr02	2912568	2912869	+	NONE	NONE
5	Os02t0152800-01	RNA polymerase Rpb1, domain 1 containing protein.	chr02	2913665	2919109	-	Biological Process: transcription, DNA-dependent (GO:0006351), Molecular Function: DNA binding (GO:0003677), Molecular Function: DNA-directed RNA polymerase activity (GO:0003899)	RNA polymerase, alpha subunit (IPR000722), RNA polymerase, N-terminal (IPR006592), RNA polymerase Rpb1, domain 1 (IPR007080)
6	Os02t0152900-01	Nucleus-encoded chloroplast protein, Chloroplast development, Biogenesis of chloroplast ATP synthase	chr02	2922461	2925073	-	NONE	NONE
7	Os02t0152950-00	Hypothetical protein.	chr02	2927568	2932130	-	NONE	NONE
8	Os02t0153000-01	Protein of unknown function DUF547 domain containing protein.	chr02	2928922	2932167	+	NONE	Domain of unknown function DUF547 (IPR006869)
9	Os02t0153100-01	Leucine-rich repeat receptor-like kinase	chr02	2933952	2937379	-	Biological Process: protein phosphorylation (GO:0006468), Molecular Function: protein kinase activity (GO:0004672), Molecular Function: protein binding (GO:0005515), Molecular Function: ATP binding (GO:0005524)	Leucine-rich repeat domain superfamily (IPR032675), Protein kinase-like domain superfamily (IPR011009), Leucine-rich repeat-containing N-terminal, plant-type (IPR013210), Protein kinase domain (IPR000719), Leucine-rich repeat, typical subtype (IPR003591), Leucine-rich repeat (IPR001611), Leucine rich repeat 4 (IPR025875), Protein kinase, ATP binding site (IPR017441), Serine/threonine-protein kina…
10	Os02t0153200-01	Leucine-rich repeat receptor-like kinase	chr02	2938046	2941437	-	Biological Process: protein phosphorylation (GO:0006468), Molecular Function: protein kinase activity (GO:0004672), Molecular Function: protein binding (GO:0005515), Molecular Function: ATP binding (GO:0005524)	Leucine-rich repeat domain superfamily (IPR032675), Protein kinase-like domain superfamily (IPR011009), Leucine-rich repeat-containing N-terminal, plant-type (IPR013210), Protein kinase domain (IPR000719), Leucine-rich repeat, typical subtype (IPR003591), Leucine-rich repeat (IPR001611), Protein kinase, ATP binding site (IPR017441), Serine/threonine-protein kinase, active site (IPR008271)
11	Os02t0153300-01	Hypothetical protein.	chr02	2944661	2949240	+	NONE	NONE
12	Os02t0153400-01	Leucine-rich repeat receptor-like kinase	chr02	2945512	2948974	-	Biological Process: protein phosphorylation (GO:0006468), Molecular Function: protein kinase activity (GO:0004672), Molecular Function: protein binding (GO:0005515), Molecular Function: ATP binding (GO:0005524)	Leucine-rich repeat domain superfamily (IPR032675), Protein kinase-like domain superfamily (IPR011009), Leucine-rich repeat-containing N-terminal, plant-type (IPR013210), Protein kinase domain (IPR000719), Leucine-rich repeat, typical subtype (IPR003591), Leucine-rich repeat (IPR001611), Protein kinase, ATP binding site (IPR017441), Serine/threonine-protein kinase, active site (IPR008271)
13	Os02t0153300-02	Hypothetical protein.	chr02	2947023	2949245	+	NONE	NONE
14	Os02t0153450-01	Hypothetical gene.	chr02	2952129	2955766	+	NONE	NONE
15	Os02t0153500-01	Leucine-rich repeat receptor-like kinase	chr02	2952436	2955585	-	Biological Process: protein phosphorylation (GO:0006468), Molecular Function: protein kinase activity (GO:0004672), Molecular Function: protein binding (GO:0005515), Molecular Function: ATP binding (GO:0005524)	Leucine-rich repeat domain superfamily (IPR032675), Protein kinase-like domain superfamily (IPR011009), Leucine-rich repeat-containing N-terminal, plant-type (IPR013210), Protein kinase domain (IPR000719), Serine-threonine/tyrosine-protein kinase, catalytic domain (IPR001245), Leucine-rich repeat, typical subtype (IPR003591), Leucine-rich repeat (IPR001611), Protein kinase, ATP binding site (IPR0…
16	Os02t0153600-01	Hypothetical protein.	chr02	2957940	2960127	+	NONE	NONE
17	Os02t0153700-01	Leucine-rich repeat receptor-like kinase	chr02	2958786	2962177	-	Biological Process: protein phosphorylation (GO:0006468), Molecular Function: protein kinase activity (GO:0004672), Molecular Function: protein binding (GO:0005515), Molecular Function: ATP binding (GO:0005524)	Leucine-rich repeat domain superfamily (IPR032675), Protein kinase-like domain superfamily (IPR011009), Leucine-rich repeat-containing N-terminal, plant-type (IPR013210), Protein kinase domain (IPR000719), Leucine-rich repeat (IPR001611), Leucine-rich repeat, typical subtype (IPR003591), Protein kinase, ATP binding site (IPR017441), Serine/threonine-protein kinase, active site (IPR008271)
18	Os02t0153900-01	Leucine-rich repeat receptor-like kinase	chr02	2965242	2968614	-	Biological Process: protein phosphorylation (GO:0006468), Molecular Function: protein kinase activity (GO:0004672), Molecular Function: protein binding (GO:0005515), Molecular Function: ATP binding (GO:0005524)	Leucine-rich repeat domain superfamily (IPR032675), Protein kinase-like domain superfamily (IPR011009), Leucine-rich repeat-containing N-terminal, plant-type (IPR013210), Protein kinase domain (IPR000719), Leucine-rich repeat, typical subtype (IPR003591), Leucine-rich repeat (IPR001611), Protein kinase, ATP binding site (IPR017441), Serine/threonine-protein kinase, active site (IPR008271)
19	Os02t0154000-01	Leucine-rich repeat receptor-like kinase, Positive regulation of the drought stress response and tiller development	chr02	2972242	2975382	-	Biological Process: protein phosphorylation (GO:0006468), Molecular Function: protein kinase activity (GO:0004672), Molecular Function: protein binding (GO:0005515), Molecular Function: ATP binding (GO:0005524)	Leucine-rich repeat domain superfamily (IPR032675), Protein kinase-like domain superfamily (IPR011009), Leucine-rich repeat-containing N-terminal, plant-type (IPR013210), Protein kinase domain (IPR000719), Leucine-rich repeat, typical subtype (IPR003591), Leucine-rich repeat (IPR001611), Serine/threonine-protein kinase, active site (IPR008271)
20	Os02t0154100-01	Antisense long noncoding RNA, Regulation of sense LRK gene cluster expression, Regulation of grain yield	chr02	2978158	2985406	+	NONE	NONE
21	Os02t0154200-01	Leucine-rich repeat receptor kinase, Regulation of grain yield	chr02	2978855	2982356	-	Biological Process: protein phosphorylation (GO:0006468), Molecular Function: protein kinase activity (GO:0004672), Molecular Function: protein binding (GO:0005515), Molecular Function: ATP binding (GO:0005524)	Leucine-rich repeat domain superfamily (IPR032675), Protein kinase-like domain superfamily (IPR011009), Leucine-rich repeat-containing N-terminal, plant-type (IPR013210), Protein kinase domain (IPR000719), Leucine-rich repeat, typical subtype (IPR003591), Leucine-rich repeat (IPR001611), Protein kinase, ATP binding site (IPR017441), Serine/threonine-protein kinase, active site (IPR008271)
22	Os02t0154300-01	Hypothetical protein.	chr02	2980587	2982399	+	NONE	NONE
23	Os02t0154600-01	Domain of unknown function DUF250 domain containing protein.	chr02	2995581	3001388	+	NONE	Domain of unknown function DUF250 (IPR004853)
24	Os02t0154600-02	Domain of unknown function DUF250 domain containing protein.	chr02	2995586	2999838	+	NONE	Domain of unknown function DUF250 (IPR004853)
25	Os02t0155000-01	Hypothetical protein.	chr02	3028276	3031655	+	NONE	NONE
26	Os02t0155300-01	Hypothetical protein.	chr02	3037553	3040481	-	NONE	NONE
27	Os02t0155400-01	Leucine-rich repeat, N-terminal domain containing protein.	chr02	3037622	3039869	+	Molecular Function: protein binding (GO:0005515)	Leucine-rich repeat (IPR001611), Leucine-rich repeat-containing N-terminal, type 2 (IPR013210)
28	Os02t0155600-00	Hypothetical conserved gene.	chr02	3048887	3050896	-	Molecular Function: protein binding (GO:0005515)	Leucine-rich repeat (IPR001611), Leucine-rich repeat, typical subtype (IPR003591)
29	Os02t0155700-00	Hypothetical conserved gene.	chr02	3059566	3061394	-	Molecular Function: protein binding (GO:0005515)	Leucine-rich repeat (IPR001611), Leucine-rich repeat, typical subtype (IPR003591), Leucine-rich repeat-containing N-terminal, type 2 (IPR013210)
30	Os02t0155900-00	Leucine-rich repeat domain containing protein.	chr02	3065811	3072625	-	Molecular Function: protein binding (GO:0005515)	Leucine-rich repeat (IPR001611)
31	Os02t0156000-00	Similar to H0201G08.2 protein.	chr02	3076962	3078826	+	Biological Process: protein phosphorylation (GO:0006468), Molecular Function: protein kinase activity (GO:0004672), Molecular Function: protein serine/threonine kinase activity (GO:0004674), Molecular Function: protein tyrosine kinase activity (GO:0004713), Molecular Function: ATP binding (GO:0005524), Molecular Function: transferase activity, transferring phosphorus-containing groups (GO:0016772)	Protein kinase, catalytic domain (IPR000719), Serine/threonine-protein kinase, catalytic domain (IPR002290), Serine/threonine-protein kinase, active site (IPR008271), Protein kinase-like domain (IPR011009), Protein kinase, ATP binding site (IPR017441), Serine/threonine-protein kinase-like domain (IPR017442), Tyrosine-protein kinase, catalytic domain (IPR020635)
32	Os02t0156100-01	Conserved hypothetical protein.	chr02	3080552	3082828	+	NONE	NONE
33	Os02t0156200-00	Leucine-rich repeat domain containing protein.	chr02	3084942	3087128	-	Molecular Function: protein binding (GO:0005515)	Leucine-rich repeat (IPR001611), Leucine-rich repeat, typical subtype (IPR003591), Leucine-rich repeat-containing N-terminal, type 2 (IPR013210)
34	Os02t0156300-01	Similar to Serine/threonine-protein kinase BRI1-like 2 precursor (EC 2.7.1.37) (BRASSINOSTEROID INSENSITIVE 1-like protein 2) (Protein VASCULAR HIGHWAY 1).	chr02	3086330	3087545	+	NONE	NONE
35	Os02t0156400-01	Leucine-rich repeat, N-terminal domain containing protein.	chr02	3092570	3095103	-	Molecular Function: protein binding (GO:0005515)	Leucine-rich repeat (IPR001611), Leucine-rich repeat-containing N-terminal, type 2 (IPR013210)
36	Os02t0156500-01	Hypothetical protein.	chr02	3093895	3095152	+	NONE	NONE
37	Os02t0156600-00	Hypothetical conserved gene.	chr02	3097247	3099450	-	Molecular Function: protein binding (GO:0005515)	Leucine-rich repeat (IPR001611), Leucine-rich repeat, typical subtype (IPR003591), Leucine-rich repeat-containing N-terminal, type 2 (IPR013210)
38	Os02t0156633-00	Hypothetical conserved gene.	chr02	3102631	3104794	-	Molecular Function: protein binding (GO:0005515)	Leucine-rich repeat (IPR001611), Leucine-rich repeat, typical subtype (IPR003591), Leucine-rich repeat-containing N-terminal, type 2 (IPR013210)
39	Os02t0156700-01	Hypothetical protein.	chr02	3106065	3109343	+	NONE	NONE
40	Os02t0156800-01	Leucine-rich repeat-containing N-terminal, type 2 domain containing protein.	chr02	3106371	3108579	-	NONE	Leucine-rich repeat-containing N-terminal, type 2 (IPR013210)
41	Os02t0157000-00	Leucine-rich repeat domain containing protein.	chr02	3113436	3120818	+	Molecular Function: protein binding (GO:0005515)	Leucine-rich repeat (IPR001611), Leucine-rich repeat-containing N-terminal, type 2 (IPR013210)
42	Os02t0157100-00	Leucine-rich repeat domain containing protein.	chr02	3124459	3126612	-	Molecular Function: protein binding (GO:0005515)	Leucine-rich repeat (IPR001611), Leucine-rich repeat-containing N-terminal, type 2 (IPR013210)
43	Os02t0157200-00	Leucine-rich repeat domain containing protein.	chr02	3127100	3129256	-	Molecular Function: protein binding (GO:0005515)	Leucine-rich repeat (IPR001611), Leucine-rich repeat-containing N-terminal, type 2 (IPR013210)
44	Os02t0157300-01	Hypothetical protein.	chr02	3132469	3137551	+	NONE	NONE
45	Os02t0157300-02	Hypothetical protein.	chr02	3132469	3136023	+	NONE	NONE
46	Os02t0157400-01	Leucine-rich repeat-containing N-terminal, type 2 domain containing protein.	chr02	3132777	3134985	-	NONE	Leucine-rich repeat-containing N-terminal, type 2 (IPR013210)
47	Os02t0157501-00	Leucine-rich repeat domain containing protein.	chr02	3136270	3138125	-	Molecular Function: protein binding (GO:0005515)	Leucine-rich repeat (IPR001611)
48	Os02t0157600-01	Arsenate (As(V)) reductase, Rhodanase-like protein, As(V) tolerance, Control of arsenic (As) accumulation	chr02	3142202	3144143	+	NONE	Rhodanese-like domain (IPR001763)
49	Os02t0157600-02	Rhodanese-like domain containing protein	chr02	3142294	3144660	+	NONE	Rhodanese-like domain (IPR001763)
50	Os02t0157700-01	Non-protein coding transcript.	chr02	3144129	3144623	-	NONE	NONE
51	Os02t0157900-00	Hypothetical conserved gene.	chr02	3158639	3160602	+	Molecular Function: nucleotide binding (GO:0000166), Molecular Function: nucleic acid binding (GO:0003676)	RNA recognition motif domain (IPR000504), RNA recognition motif 2 (IPR007201), Nucleotide-binding, alpha-beta plait (IPR012677)
52	Os02t0157950-01	Hypothetical gene.	chr02	3163897	3165102	+	NONE	NONE
53	Os02t0158100-01	EF hand domain containing protein.	chr02	3166617	3170816	-	Molecular Function: GTPase activity (GO:0003924), Molecular Function: calcium ion binding (GO:0005509), Molecular Function: protein binding (GO:0005515), Molecular Function: GTP binding (GO:0005525)	EPS15 homology (EH) (IPR000261), Dynamin, GTPase domain (IPR001401), EF-hand-like domain (IPR011992), EF-HAND 2 (IPR018249)
54	Os02t0158100-02	Similar to EH-domain-containing protein 1.	chr02	3166617	3166906	-	NONE	NONE
55	Os02t0158200-00	Hypothetical protein.	chr02	3166740	3170798	+	NONE	NONE
56	Os02t0158300-01	Sugar isomerase (SIS) domain containing protein.	chr02	3179485	3182746	+	Biological Process: carbohydrate metabolic process (GO:0005975), Molecular Function: protein binding (GO:0005515), Molecular Function: sugar binding (GO:0005529), Molecular Function: isomerase activity (GO:0016853)	Cystathionine beta-synthase, core (IPR000644), Sugar isomerase (SIS) (IPR001347), KpsF/GutQ (IPR004800)
57	Os02t0158350-00	Hypothetical protein.	chr02	3179578	3182639	-	NONE	NONE
58	Os02t0158400-01	ssDNA-binding transcriptional regulator family protein.	chr02	3182926	3187016	-	Biological Process: regulation of transcription, DNA-dependent (GO:0006355), Molecular Function: DNA binding (GO:0003677), Molecular Function: binding (GO:0005488)	ssDNA-binding transcriptional regulator (IPR009044), Plant transcription factor (IPR013742)
59	Os02t0158500-00	Uncharacterized plant-specific domain 01627 containing protein.	chr02	3187973	3190043	-	NONE	Conserved hypothetical protein CHP01627 (IPR006514), Protein of unknown function DUF579 (IPR021148)
60	Os02t0158550-00	Hypothetical protein.	chr02	3188143	3189588	+	NONE	NONE
61	Os02t0158600-01	Conserved hypothetical protein.	chr02	3191322	3194133	-	NONE	NONE
62	Os02t0158701-00	Similar to predicted protein.	chr02	3196192	3196414	+	NONE	NONE
63	Os02t0158800-01	Protein of unknown function DUF246, plant family protein.	chr02	3197174	3203105	+	NONE	GDP-fucose protein O-fucosyltransferase (IPR019378)
64	Os02t0158900-01	Similar to SNF4.	chr02	3204086	3206332	+	Molecular Function: protein binding (GO:0005515)	Cystathionine beta-synthase, core (IPR000644)
65	Os02t0159000-00	Conserved hypothetical protein.	chr02	3207416	3208323	+	NONE	NONE
66	Os02t0159100-00	Hypothetical protein.	chr02	3212238	3216435	-	NONE	NONE
67	Os02t0159200-01	Protein of unknown function DUF292, eukaryotic domain containing protein.	chr02	3212392	3216605	+	NONE	Domain of unknown function DUF292, eukaryotic (IPR005061)
68	Os02t0159200-02	Hypothetical conserved gene.	chr02	3215708	3216619	+	NONE	NONE
69	Os02t0159250-00	Hypothetical conserved gene.	chr02	3217580	3217852	-	NONE	NONE
70	Os02t0159300-00	Conserved hypothetical protein.	chr02	3218987	3219529	+	NONE	NONE
71	Os02t0159400-01	Conserved hypothetical protein.	chr02	3220242	3225322	-	NONE	NONE
72	Os02t0159700-03	Hypothetical gene.	chr02	3227570	3229291	-	NONE	NONE
73	Os02t0159800-01	Cyclin-like F-box domain containing protein.	chr02	3227681	3229224	+	NONE	Protein of unknown function DUF295 (IPR005174)
74	Os02t0159700-01	Similar to electron transport SCO1/SenC family protein.	chr02	3228969	3233296	-	NONE	NONE
75	Os02t0159700-02	Hypothetical conserved gene.	chr02	3232405	3233278	-	NONE	NONE
76	Os02t0159850-00	Similar to predicted protein.	chr02	3233676	3233934	-	NONE	NONE
77	Os02t0159900-01	SKD1 protein (Vacuolar sorting protein 4b).	chr02	3234312	3237645	+	Molecular Function: nucleotide binding (GO:0000166), Molecular Function: ATP binding (GO:0005524), Molecular Function: nucleoside-triphosphatase activity (GO:0017111)	ATPase, AAA+ type, core (IPR003593), ATPase, AAA-type, core (IPR003959), ATPase, AAA-type, conserved site (IPR003960), MIT (IPR007330), Vps4 oligomerisation, C-terminal (IPR015415)
78	Os02t0159950-00	Hypothetical gene.	chr02	3234460	3236867	-	NONE	NONE
79	Os02t0160000-01	Similar to Kluyveromyces lactis strain NRRL Y-1140 chromosome B of strain NRRL Y- 1140 of Kluyveromyces lactis.	chr02	3237586	3237983	-	Molecular Function: ATP binding (GO:0005524), Molecular Function: hydrolase activity, acting on acid anhydrides, in phosphorus-containing anhydrides (GO:0016818)	DSH, C-terminal (IPR012961)
80	Os02t0160200-01	Cyclin-like F-box domain containing protein.	chr02	3254925	3256897	+	Molecular Function: protein binding (GO:0005515)	F-box domain, cyclin-like (IPR001810), FBD-like (IPR006566), F-box domain, Skp2-like (IPR022364)
81	Os02t0160250-00	Hypothetical conserved gene.	chr02	3263401	3265393	+	Biological Process: ATP hydrolysis coupled proton transport (GO:0015991), Cellular Component: vacuolar proton-transporting V-type ATPase, V1 domain (GO:0000221), Molecular Function: binding (GO:0005488), Molecular Function: protein binding (GO:0005515), Molecular Function: proton-transporting ATPase activity, rotational mechanism (GO:0046961)	Armadillo (IPR000225), ATPase, V1 complex, subunit H (IPR004908), Armadillo-like helical (IPR011989), Armadillo-type fold (IPR016024)
82	Os02t0160300-01	Hypothetical protein.	chr02	3265700	3268325	-	NONE	NONE
83	Os02t0160400-01	Similar to Monosaccharide transporter 3.	chr02	3266011	3268700	+	Biological Process: transport (GO:0006810), Biological Process: transmembrane transport (GO:0055085), Cellular Component: membrane (GO:0016020), Cellular Component: integral to membrane (GO:0016021), Molecular Function: transporter activity (GO:0005215), Molecular Function: transmembrane transporter activity (GO:0022857), Molecular Function: substrate-specific transmembrane transporter activity (…	Sugar/inositol transporter (IPR003663), General substrate transporter (IPR005828), Sugar transporter, conserved site (IPR005829), Major facilitator superfamily domain, general substrate transporter (IPR016196), Major facilitator superfamily domain (IPR020846)
84	Os02t0160500-01	Hypothetical conserved gene.	chr02	3271379	3272038	-	NONE	NONE
85	Os02t0160800-01	Hypothetical protein.	chr02	3279375	3280952	-	NONE	NONE
86	Os02t0160900-01	Protein of unknown function wound-induced domain containing protein.	chr02	3279594	3280500	+	NONE	Protein of unknown function wound-induced (IPR022251)
87	Os02t0161000-01	Similar to Serine/threonine protein kinase-like protein.	chr02	3283264	3286366	-	Biological Process: protein phosphorylation (GO:0006468), Biological Process: signal transduction (GO:0007165), Molecular Function: protein kinase activity (GO:0004672), Molecular Function: protein serine/threonine kinase activity (GO:0004674), Molecular Function: protein tyrosine kinase activity (GO:0004713), Molecular Function: ATP binding (GO:0005524), Molecular Function: transferase activity,…	Protein kinase, catalytic domain (IPR000719), Serine/threonine-protein kinase, catalytic domain (IPR002290), NAF domain (IPR004041), Serine/threonine-protein kinase, active site (IPR008271), Protein kinase-like domain (IPR011009), Protein kinase, ATP binding site (IPR017441), Serine/threonine-protein kinase-like domain (IPR017442), NAF/FISL domain (IPR018451), Tyrosine-protein kinase, catalytic d…
88	Os02t0161050-01	Hypothetical gene.	chr02	3284875	3288054	+	NONE	NONE
89	Os02t0161100-01	Actin-binding FH2 domain containing protein.	chr02	3291235	3295426	+	Biological Process: cellular component organization (GO:0016043), Biological Process: actin cytoskeleton organization (GO:0030036), Molecular Function: actin binding (GO:0003779)	Actin-binding FH2/DRF autoregulatory (IPR003104), Actin-binding FH2 (IPR015425)
90	Os02t0161200-01	Zinc finger, CCCH-type domain containing protein.	chr02	3297230	3303782	+	Molecular Function: nucleic acid binding (GO:0003676), Molecular Function: zinc ion binding (GO:0008270)	Zinc finger, CCCH-type (IPR000571)
91	Os02t0161251-01	Hypothetical gene.	chr02	3301680	3306366	-	NONE	NONE
92	Os02t0161300-01	Similar to Mot1 (Fragment).	chr02	3311245	3313190	+	NONE	Domain of unknown function DUF3535 (IPR022707)
93	Os02t0161400-01	Non-protein coding transcript.	chr02	3318065	3318354	+	NONE	NONE
94	Os02t0161500-00	Leucine-rich repeat domain containing protein.	chr02	3325040	3326725	+	Molecular Function: protein binding (GO:0005515)	Leucine-rich repeat (IPR001611), Leucine-rich repeat, typical subtype (IPR003591)
95	Os02t0161601-00	Hypothetical gene.	chr02	3327802	3328574	+	NONE	NONE
96	Os02t0161800-01	Similar to Peroxidase precursor (EC 1.11.1.7).	chr02	3336154	3339094	-	Biological Process: response to oxidative stress (GO:0006979), Biological Process: oxidation-reduction process (GO:0055114), Molecular Function: peroxidase activity (GO:0004601), Molecular Function: heme binding (GO:0020037)	Plant peroxidase (IPR000823), Haem peroxidase, plant/fungal/bacterial (IPR002016), Haem peroxidase (IPR010255), Peroxidases heam-ligand binding site (IPR019793)
97	Os02t0161900-01	Similar to polyubiquitin containing 7 ubiquitin monomers.	chr02	3340458	3343060	-	Molecular Function: protein binding (GO:0005515)	Ubiquitin (IPR000626), Ubiquitin conserved site (IPR019954), Ubiquitin supergroup (IPR019955), Ubiquitin subgroup (IPR019956)
98	Os02t0162000-02	Cytochrome c oxidase, subunit VIIa domain containing protein.	chr02	3344787	3347324	-	Cellular Component: mitochondrial respiratory chain (GO:0005746), Molecular Function: cytochrome-c oxidase activity (GO:0004129), Molecular Function: electron carrier activity (GO:0009055)	Cytochrome c oxidase, subunit VIIa (IPR003177)
99	Os02t0162000-01	Cytochrome c oxidase, subunit VIIa domain containing protein.	chr02	3344959	3347407	-	Cellular Component: mitochondrial respiratory chain (GO:0005746), Molecular Function: cytochrome-c oxidase activity (GO:0004129), Molecular Function: electron carrier activity (GO:0009055)	Cytochrome c oxidase, subunit VIIa (IPR003177)
100	Os02t0162050-00	Non-protein coding transcript.	chr02	3345017	3345473	+	NONE	NONE
101	Os02t0162150-00	Hypothetical protein.	chr02	3352116	3353370	-	NONE	NONE
102	Os02t0162200-00	Similar to Early salt stress and cold acclimation-induced protein 2-3.	chr02	3353590	3358320	+	Molecular Function: copper ion binding (GO:0005507), Molecular Function: electron carrier activity (GO:0009055)	Plastocyanin-like (IPR003245), Cupredoxin (IPR008972)
103	Os02t0162500-01	Similar to 40S ribosomal protein S14.	chr02	3358928	3360718	-	Biological Process: translation (GO:0006412), Cellular Component: intracellular (GO:0005622), Cellular Component: ribosome (GO:0005840), Molecular Function: structural constituent of ribosome (GO:0003735)	Ribosomal protein S11 (IPR001971), Ribosomal S11, conserved site (IPR018102)
104	Os02t0162600-01	Conserved hypothetical protein.	chr02	3362047	3362944	+	NONE	NONE
105	Os02t0162700-01	Non-protein coding transcript.	chr02	3362834	3364270	-	NONE	NONE
106	Os02t0162733-00	Similar to WD-40 repeat family protein / beige-related.	chr02	3366176	3367813	-	NONE	BEACH domain (IPR000409)
107	Os02t0162766-01	Hypothetical conserved gene.	chr02	3378928	3386412	-	NONE	NONE
108	Os02t0162783-00	Non-protein coding transcript.	chr02	3384035	3384907	+	NONE	NONE
109	Os02t0163300-01	Conserved hypothetical protein.	chr02	3408036	3409023	+	NONE	NONE
110	Os02t0163400-01	Hypothetical protein.	chr02	3411221	3415257	+	NONE	NONE
111	Os02t0163500-01	Conserved hypothetical protein.	chr02	3415483	3418396	-	NONE	NONE
112	Os02t0163533-01	Conserved hypothetical protein.	chr02	3420286	3423446	-	NONE	NONE
113	Os02t0163600-01	Conserved hypothetical protein.	chr02	3428550	3431067	-	NONE	NONE
114	Os02t0164000-00	Peptidase C48, SUMO/Sentrin/Ubl1 domain containing protein.	chr02	3441185	3446850	-	Biological Process: proteolysis (GO:0006508), Molecular Function: cysteine-type peptidase activity (GO:0008234)	Peptidase C48, SUMO/Sentrin/Ubl1 (IPR003653)
115	Os02t0164300-01	Similar to beta-1,3-galactosyltransferase sqv-2.	chr02	3453698	3457174	+	Biological Process: protein glycosylation (GO:0006486), Cellular Component: membrane (GO:0016020), Molecular Function: galactosyltransferase activity (GO:0008378)	Glycosyl transferase, family 31 (IPR002659)
116	Os02t0164300-02	Glycosyl transferase, family 31 protein.	chr02	3455972	3457537	+	Biological Process: protein glycosylation (GO:0006486), Cellular Component: membrane (GO:0016020), Molecular Function: galactosyltransferase activity (GO:0008378)	Glycosyl transferase, family 31 (IPR002659)
117	Os02t0164400-00	Hypothetical conserved gene.	chr02	3458171	3458730	+	NONE	NONE
118	Os02t0164600-01	Pentatricopeptide repeat domain containing protein.	chr02	3465970	3468922	+	NONE	Pentatricopeptide repeat (IPR002885)
119	Os02t0164800-01	Zinc finger, C2H2-type domain containing protein.	chr02	3473348	3474123	+	NONE	NONE
120	Os02t0164900-01	Similar to Auxin response factor 3.	chr02	3486813	3492905	+	Biological Process: regulation of transcription, DNA-dependent (GO:0006355), Biological Process: response to hormone stimulus (GO:0009725), Cellular Component: nucleus (GO:0005634), Molecular Function: DNA binding (GO:0003677), Molecular Function: protein dimerization activity (GO:0046983)	AUX/IAA protein (IPR003311), Transcriptional factor B3 (IPR003340), Auxin response factor (IPR010525), Aux/IAA-ARF-dimerisation (IPR011525), DNA-binding pseudobarrel domain (IPR015300)
121	Os02t0164900-02	Similar to Auxin response factor 3.	chr02	3487434	3492876	+	Biological Process: regulation of transcription, DNA-dependent (GO:0006355), Biological Process: response to hormone stimulus (GO:0009725), Cellular Component: nucleus (GO:0005634), Molecular Function: DNA binding (GO:0003677), Molecular Function: protein dimerization activity (GO:0046983)	AUX/IAA protein (IPR003311), Transcriptional factor B3 (IPR003340), Auxin response factor (IPR010525), Aux/IAA-ARF-dimerisation (IPR011525), DNA-binding pseudobarrel domain (IPR015300)
122	Os02t0165000-01	Zinc finger, RING/FYVE/PHD-type domain containing protein.	chr02	3495320	3500149	-	Molecular Function: zinc ion binding (GO:0008270)	Zinc finger, RING-CH-type (IPR011016), Zinc finger, RING/FYVE/PHD-type (IPR013083)
123	Os02t0165000-02	Zinc finger, RING/FYVE/PHD-type domain containing protein.	chr02	3495330	3500112	-	Molecular Function: zinc ion binding (GO:0008270)	Zinc finger, RING-CH-type (IPR011016), Zinc finger, RING/FYVE/PHD-type (IPR013083)
124	Os02t0165100-01	Protein kinase, core domain containing protein.	chr02	3504423	3508658	+	Biological Process: protein phosphorylation (GO:0006468), Molecular Function: protein kinase activity (GO:0004672), Molecular Function: protein serine/threonine kinase activity (GO:0004674), Molecular Function: ATP binding (GO:0005524), Molecular Function: transferase activity, transferring phosphorus-containing groups (GO:0016772)	Protein kinase, catalytic domain (IPR000719), Serine/threonine-protein kinase, active site (IPR008271), Protein kinase-like domain (IPR011009), Protein kinase, ATP binding site (IPR017441), Serine/threonine-protein kinase-like domain (IPR017442)
125	Os02t0165200-01	Hypothetical protein.	chr02	3507769	3512094	-	NONE	NONE
126	Os02t0165500-01	Conserved hypothetical protein.	chr02	3540933	3542667	+	NONE	NONE
127	Os02t0165800-01	Conserved hypothetical protein.	chr02	3548382	3549142	+	NONE	NONE
128	Os02t0166200-01	Non-protein coding transcript.	chr02	3557488	3560496	+	NONE	NONE
129	Os02t0166501-00	Hypothetical conserved gene.	chr02	3572264	3573102	+	NONE	NONE
130	Os02t0166600-01	Hypothetical protein.	chr02	3580321	3581706	+	NONE	NONE
131	Os02t0166800-01	Protein of unknown function DUF640 domain containing protein.	chr02	3594428	3596589	+	NONE	Domain of unknown function DUF640 (IPR006936)
132	Os02t0166875-00	Hypothetical protein.	chr02	3595652	3596095	-	NONE	NONE
133	Os02t0166950-01	Hypothetical gene.	chr02	3607092	3610230	-	NONE	NONE
134	Os02t0167000-00	Similar to holocarboxylase synthetase 1.	chr02	3607122	3609843	+	Biological Process: protein modification process (GO:0006464), Molecular Function: catalytic activity (GO:0003824), Molecular Function: biotin-[acetyl-CoA-carboxylase] ligase activity (GO:0004077)	Biotin protein ligase, C-terminal (IPR003142), Biotin/lipoate A/B protein ligase (IPR004143), Biotin--acetyl-CoA-carboxylase ligase (IPR004408)
135	Os02t0167100-01	Similar to 3-mercaptopyruvate sulfurtransferase precursor (EC 2.8.1.1).	chr02	3610970	3613988	+	Molecular Function: thiosulfate sulfurtransferase activity (GO:0004792)	Thiosulphate sulfurtransferase, conserved site (IPR001307), Rhodanese-like (IPR001763)
136	Os02t0167200-01	Pentatricopeptide repeat domain containing protein.	chr02	3614133	3616333	-	Molecular Function: binding (GO:0005488)	Pentatricopeptide repeat (IPR002885), Tetratricopeptide-like helical (IPR011990)
137	Os02t0167366-00	Hypothetical protein.	chr02	3619823	3622457	-	NONE	NONE
138	Os02t0167300-01	Tubulin beta-3 chain (Beta-3 tubulin).	chr02	3619840	3622862	+	Biological Process: GTP catabolic process (GO:0006184), Biological Process: microtubule-based process (GO:0007017), Biological Process: microtubule-based movement (GO:0007018), Biological Process: protein polymerization (GO:0051258), Cellular Component: microtubule (GO:0005874), Cellular Component: protein complex (GO:0043234), Molecular Function: GTPase activity (GO:0003924), Molecular Function:…	Tubulin (IPR000217), Beta tubulin (IPR002453), Tubulin/FtsZ, GTPase domain (IPR003008), Tubulin/FtsZ, C-terminal (IPR008280), Beta tubulin, autoregulation binding site (IPR013838), Tubulin, conserved site (IPR017975), Tubulin/FtsZ, 2-layer sandwich domain (IPR018316), Tubulin, C-terminal (IPR023123)
139	Os02t0167300-02	Similar to Tubulin beta-5 chain.	chr02	3621165	3622794	+	Biological Process: GTP catabolic process (GO:0006184), Biological Process: microtubule-based process (GO:0007017), Biological Process: microtubule-based movement (GO:0007018), Biological Process: protein polymerization (GO:0051258), Cellular Component: microtubule (GO:0005874), Cellular Component: protein complex (GO:0043234), Molecular Function: GTPase activity (GO:0003924), Molecular Function:…	Tubulin (IPR000217), Beta tubulin (IPR002453), Tubulin/FtsZ, GTPase domain (IPR003008), Tubulin/FtsZ, C-terminal (IPR008280), Tubulin/FtsZ, 2-layer sandwich domain (IPR018316), Tubulin, C-terminal (IPR023123)
140	Os02t0167400-00	Non-protein coding transcript.	chr02	3623229	3623298	+	NONE	NONE
141	Os02t0167500-01	RNA recognition motif domain domain containing protein.	chr02	3623786	3631539	-	Cellular Component: intracellular (GO:0005622), Molecular Function: nucleotide binding (GO:0000166), Molecular Function: nucleic acid binding (GO:0003676), Molecular Function: zinc ion binding (GO:0008270)	RNA recognition motif domain (IPR000504), Zinc finger, RanBP2-type (IPR001876), Nucleotide-binding, alpha-beta plait (IPR012677)
142	Os02t0167600-01	Hypothetical gene.	chr02	3655252	3656179	+	NONE	NONE
143	Os02t0167700-01	Armadillo-like helical domain containing protein.	chr02	3659299	3669323	-	Molecular Function: binding (GO:0005488)	Armadillo-like helical (IPR011989), TATA-binding protein interacting (TIP20) (IPR013932), Armadillo-type fold (IPR016024)
144	Os02t0167850-00	Non-protein coding transcript.	chr02	3672581	3672989	-	NONE	NONE
145	Os02t0168000-01	Similar to urease accessory protein F.	chr02	3672974	3677649	+	Biological Process: nitrogen compound metabolic process (GO:0006807), Molecular Function: nickel ion binding (GO:0016151)	Urease accessory protein UreF (IPR002639)
146	Os02t0168000-02	Similar to UreF.	chr02	3674682	3677044	+	Biological Process: nitrogen compound metabolic process (GO:0006807), Molecular Function: nickel ion binding (GO:0016151)	Urease accessory protein UreF (IPR002639)
147	Os02t0168100-01	Similar to 4-hydroxyphenylpyruvate dioxygenase.	chr02	3677525	3679266	-	Biological Process: aromatic amino acid family metabolic process (GO:0009072), Biological Process: oxidation-reduction process (GO:0055114), Molecular Function: 4-hydroxyphenylpyruvate dioxygenase activity (GO:0003868), Molecular Function: oxidoreductase activity, acting on single donors with incorporation of molecular oxygen (GO:0016701)	Glyoxalase/fosfomycin resistance/dioxygenase (IPR004360), 4-hydroxyphenylpyruvate dioxygenase (IPR005956)
148	Os02t0168200-01	Similar to Transfactor-like protein.	chr02	3682192	3684126	-	Biological Process: regulation of transcription, DNA-dependent (GO:0006355), Molecular Function: DNA binding (GO:0003677), Molecular Function: protein binding (GO:0005515)	Myb-like DNA-binding domain, SHAQKYF class (IPR006447), Homeodomain-like (IPR009057), Homeodomain-related (IPR012287), Myb, DNA-binding (IPR014778)
149	Os02t0168250-00	Hypothetical protein.	chr02	3687883	3690834	-	NONE	NONE
150	Os02t0168300-01	Conserved hypothetical protein.	chr02	3687919	3691304	+	NONE	NONE
151	Os02t0168400-01	Hypothetical conserved gene.	chr02	3696212	3699700	+	Molecular Function: binding (GO:0005488)	Armadillo-like helical (IPR011989), Armadillo-type fold (IPR016024)
152	Os02t0168500-01	Similar to Protein-O-fucosyltransferase 1.	chr02	3703074	3705337	+	NONE	GDP-fucose protein O-fucosyltransferase (IPR019378)
153	Os02t0168500-02	Similar to Protein-O-fucosyltransferase 1.	chr02	3703087	3705337	+	NONE	GDP-fucose protein O-fucosyltransferase (IPR019378)
154	Os02t0168550-00	Non-protein coding transcript.	chr02	3703670	3705482	-	NONE	NONE
155	Os02t0168600-01	Ovarian tumour, otubain domain containing protein.	chr02	3705886	3709904	-	NONE	Ovarian tumour, otubain (IPR003323)
156	Os02t0168700-01	Peptidyl-prolyl cis-trans isomerase, FKBP-type domain containing protein.	chr02	3711186	3713407	-	Biological Process: protein folding (GO:0006457)	Peptidyl-prolyl cis-trans isomerase, FKBP-type, domain (IPR001179), Twin-arginine translocation pathway, signal sequence (IPR006311), Peptidyl-prolyl cis-trans isomerase, FKBP-type (IPR023566)
157	Os02t0168800-01	Similar to Porphobilinogen deaminase (Fragment).	chr02	3715361	3718245	+	Biological Process: peptidyl-pyrromethane cofactor linkage (GO:0018160), Biological Process: tetrapyrrole biosynthetic process (GO:0033014), Molecular Function: hydroxymethylbilane synthase activity (GO:0004418)	Tetrapyrrole biosynthesis, hydroxymethylbilane synthase (IPR000860), Porphobilinogen deaminase, N-terminal (IPR022417), Porphobilinogen deaminase, C-terminal (IPR022418), Porphobilinogen deaminase, dipyrromethane cofactor binding site (IPR022419)
158	Os02t0168800-02	Similar to Porphobilinogen deaminase, chloroplastic.	chr02	3716056	3718262	+	Biological Process: peptidyl-pyrromethane cofactor linkage (GO:0018160), Biological Process: tetrapyrrole biosynthetic process (GO:0033014), Molecular Function: hydroxymethylbilane synthase activity (GO:0004418)	Tetrapyrrole biosynthesis, hydroxymethylbilane synthase (IPR000860), Porphobilinogen deaminase, N-terminal (IPR022417), Porphobilinogen deaminase, C-terminal (IPR022418), Porphobilinogen deaminase, dipyrromethane cofactor binding site (IPR022419)
159	Os02t0168850-00	Hypothetical gene.	chr02	3716574	3717957	-	NONE	NONE
160	Os02t0168900-01	Ribonuclease H2, subunit C domain containing protein.	chr02	3718362	3720114	-	NONE	Ribonuclease H2, subunit C (IPR013924)
161	Os02t0169000-01	Similar to T6H22.2 protein.	chr02	3720874	3724570	-	NONE	NONE
162	Os02t0169300-01	Similar to Phosphoglycerate kinase, cytosolic (EC 2.7.2.3).	chr02	3727551	3731217	+	Biological Process: glycolysis (GO:0006096), Molecular Function: phosphoglycerate kinase activity (GO:0004618)	Phosphoglycerate kinase (IPR001576), Phosphoglycerate kinase, N-terminal (IPR015824), Phosphoglycerate kinase, C-terminal (IPR015901), Phosphoglycerate kinase, conserved site (IPR015911)
163	Os02t0169151-00	Hypothetical gene.	chr02	3727735	3731136	-	NONE	NONE
164	Os02t0169275-00	Non-protein coding transcript.	chr02	3741693	3742632	-	NONE	NONE
165	Os02t0169400-01	Argonaute (AGO) protein, Regulation of grain size and weight, Promotion of stem development	chr02	3748511	3755492	-	Molecular Function: nucleic acid binding (GO:0003676), Molecular Function: protein binding (GO:0005515)	PAZ domain superfamily (IPR036085), Ribonuclease H-like superfamily (IPR012337), Ribonuclease H superfamily (IPR036397), Protein argonaute, N-terminal (IPR032474), Argonaute, linker 1 domain (IPR014811), PAZ domain (IPR003100), Argonaute linker 2 domain (IPR032472), Piwi domain (IPR003165)
166	Os02t0169450-00	Non-protein coding transcript.	chr02	3749126	3750016	+	NONE	NONE
167	Os02t0169700-01	Glycine cleavage H-protein family protein.	chr02	3772299	3776057	+	Biological Process: glycine catabolic process (GO:0006546), Biological Process: glycine decarboxylation via glycine cleavage system (GO:0019464), Cellular Component: glycine cleavage complex (GO:0005960)	Glycine cleavage H-protein (IPR002930), Single hybrid motif (IPR011053), Glycine cleavage H-protein, subgroup (IPR017453)
168	Os02t0169800-01	Armadillo-like helical domain containing protein.	chr02	3778039	3791798	+	Molecular Function: binding (GO:0005488)	Armadillo-like helical (IPR011989), Armadillo-type fold (IPR016024)
169	Os02t0169900-01	Inositol monophosphatase family protein.	chr02	3792694	3796762	-	Molecular Function: inositol or phosphatidylinositol phosphatase activity (GO:0004437)	Inositol monophosphatase (IPR000760), Inositol monophosphatase, conserved site (IPR020550), Inositol monophosphatase, metal-binding site (IPR020583)
170	Os02t0169900-02	Inositol monophosphatase family protein.	chr02	3792745	3796736	-	Molecular Function: inositol or phosphatidylinositol phosphatase activity (GO:0004437)	Inositol monophosphatase (IPR000760), Inositol monophosphatase, conserved site (IPR020550), Inositol monophosphatase, metal-binding site (IPR020583)
171	Os02t0169900-03	Similar to IMPL1 (MYO-INOSITOL MONOPHOSPHATASE LIKE 1); 3'(2'),5'-bisphosphate nucleotidase/ inositol or phosphatidylinositol phosphatase/ inositol-1(or 4)-monophosphatase.	chr02	3792745	3796699	-	Molecular Function: inositol or phosphatidylinositol phosphatase activity (GO:0004437)	Inositol monophosphatase (IPR000760), Inositol monophosphatase, conserved site (IPR020550), Inositol monophosphatase, metal-binding site (IPR020583)
172	Os02t0170000-01	Conserved hypothetical protein.	chr02	3797629	3800883	+	NONE	NONE
173	Os02t0170000-02	Pentatricopeptide repeat domain containing protein.	chr02	3798551	3800882	+	Molecular Function: binding (GO:0005488)	Pentatricopeptide repeat (IPR002885), Tetratricopeptide-like helical (IPR011990)
174	Os02t0170100-01	Glycine cleavage H-protein family protein.	chr02	3827878	3830121	+	Biological Process: glycine catabolic process (GO:0006546), Biological Process: glycine decarboxylation via glycine cleavage system (GO:0019464), Cellular Component: glycine cleavage complex (GO:0005960)	Glycine cleavage H-protein (IPR002930), 2-oxo acid dehydrogenase, lipoyl-binding site (IPR003016), Single hybrid motif (IPR011053), Glycine cleavage H-protein, subgroup (IPR017453)
175	Os02t0170100-02	Glycine cleavage H-protein family protein.	chr02	3827940	3830119	+	Biological Process: glycine catabolic process (GO:0006546), Biological Process: glycine decarboxylation via glycine cleavage system (GO:0019464), Cellular Component: glycine cleavage complex (GO:0005960)	Glycine cleavage H-protein (IPR002930), 2-oxo acid dehydrogenase, lipoyl-binding site (IPR003016), Single hybrid motif (IPR011053), Glycine cleavage H-protein, subgroup (IPR017453)
176	Os02t0170150-00	Non-protein coding transcript.	chr02	3829446	3829814	-	NONE	NONE
177	Os02t0170200-01	Similar to splicing factor, arginine/serine-rich 12.	chr02	3830537	3832335	-	NONE	NONE
178	Os02t0170300-01	MADS box transcription factor, Regulator of early seed development	chr02	3833130	3837135	-	Biological Process: regulation of transcription, DNA-templated (GO:0006355), Molecular Function: DNA binding (GO:0003677), Molecular Function: sequence-specific DNA binding transcription factor activity (GO:0003700), Molecular Function: protein dimerization activity (GO:0046983), Cellular Component: nucleus (GO:0005634)	Transcription factor, MADS-box (IPR002100), Transcription factor, K-box (IPR002487)
179	Os02t0170500-01	Histone-fold domain containing protein.	chr02	3846223	3850113	-	Cellular Component: intracellular (GO:0005622), Molecular Function: DNA binding (GO:0003677), Molecular Function: sequence-specific DNA binding (GO:0043565)	Transcription factor CBF/NF-Y/archaeal histone (IPR003958), Histone-fold (IPR009072)
180	Os02t0170701-00	Conserved hypothetical protein.	chr02	3853232	3853795	-	NONE	NONE
181	Os02t0170900-01	Conserved hypothetical protein.	chr02	3855966	3863872	-	NONE	NONE
182	Os02t0171001-00	Non-protein coding transcript.	chr02	3861702	3862553	+	NONE	NONE
183	Os02t0170900-02	Hypothetical conserved gene.	chr02	3862225	3863867	-	NONE	NONE
184	Os02t0171100-01	Similar to Glyceraldehyde-3-phosphate dehydrogenase (EC 1.2.1.12) (GAPDH).	chr02	3868115	3872945	+	Biological Process: glucose metabolic process (GO:0006006), Biological Process: oxidation-reduction process (GO:0055114), Molecular Function: nucleotide binding (GO:0000166), Molecular Function: oxidoreductase activity, acting on the aldehyde or oxo group of donors, NAD or NADP as acceptor (GO:0016620), Molecular Function: NADP binding (GO:0050661), Molecular Function: NAD binding (GO:0051287)	Glyceraldehyde-3-phosphate dehydrogenase, type I (IPR006424), NAD(P)-binding domain (IPR016040), Glyceraldehyde 3-phosphate dehydrogenase, NAD(P) binding domain (IPR020828), Glyceraldehyde 3-phosphate dehydrogenase, catalytic domain (IPR020829), Glyceraldehyde 3-phosphate dehydrogenase, active site (IPR020830), Glyceraldehyde/Erythrose phosphate dehydrogenase family (IPR020831)
185	Os02t0171301-00	Hypothetical gene.	chr02	3868227	3872798	-	NONE	NONE
186	Os02t0171100-02	Similar to glyceraldehyde-3-phosphate dehydrogenase, cytosolic.	chr02	3871647	3872864	+	Biological Process: oxidation-reduction process (GO:0055114), Molecular Function: oxidoreductase activity, acting on the aldehyde or oxo group of donors, NAD or NADP as acceptor (GO:0016620)	Glyceraldehyde 3-phosphate dehydrogenase, catalytic domain (IPR020829), Glyceraldehyde/Erythrose phosphate dehydrogenase family (IPR020831)
187	Os02t0171500-00	Gamma thionin family protein.	chr02	3909560	3909841	+	Biological Process: defense response (GO:0006952)	Knottin (IPR003614), Gamma thionin (IPR008176)
188	Os02t0171700-01	Knottin domain containing protein.	chr02	3926807	3927390	+	Biological Process: defense response (GO:0006952)	Knottin (IPR003614)
189	Os02t0172000-00	Similar to Defensin protein 1.	chr02	3929618	3933222	+	Biological Process: defense response (GO:0006952)	Knottin (IPR003614), Gamma thionin (IPR008176), Gamma Purothionin (IPR008177)
190	Os02t0172300-00	Hypothetical conserved gene.	chr02	3946045	3946543	+	Biological Process: defense response (GO:0006952)	Knottin (IPR003614), Gamma thionin (IPR008176)
191	Os02t0172600-00	Similar to heavy metal ATPase.	chr02	3950459	3955971	-	Biological Process: ATP biosynthetic process (GO:0006754), Biological Process: cation transport (GO:0006812), Biological Process: copper ion transport (GO:0006825), Biological Process: metabolic process (GO:0008152), Biological Process: metal ion transport (GO:0030001), Cellular Component: membrane (GO:0016020), Cellular Component: integral to membrane (GO:0016021), Molecular Function: nucleotide…	ATPase, P-type, H+ transporting proton pump (IPR000695), ATPase, P-type, K/Mg/Cd/Cu/Zn/Na/Ca/Na/H-transporter (IPR001757), Haloacid dehalogenase-like hydrolase (IPR005834), Heavy metal-associated domain, HMA (IPR006121), Heavy metal-associated domain, copper ion-binding (IPR006122), ATPase, P-type, heavy metal translocating (IPR006416), ATPase, P-type, ATPase-associated domain (IPR008250), Heavy-…
192	Os02t0172800-01	Similar to Zinc-binding protein.	chr02	3971431	3975146	+	Cellular Component: intracellular (GO:0005622), Molecular Function: zinc ion binding (GO:0008270)	Zinc finger, B-box (IPR000315), Protein of unknown function DUF597 (IPR006734)
193	Os02t0172850-01	Hypothetical conserved gene.	chr02	3977836	3978633	-	NONE	NONE
194	Os02t0173000-01	Similar to UreD.	chr02	3992043	3995076	-	NONE	NONE
195	Os02t0173100-01	Similar to cytochrome P450.	chr02	3995980	4002624	+	Biological Process: oxidation-reduction process (GO:0055114), Molecular Function: iron ion binding (GO:0005506), Molecular Function: electron carrier activity (GO:0009055), Molecular Function: oxidoreductase activity, acting on paired donors, with incorporation or reduction of molecular oxygen (GO:0016705), Molecular Function: heme binding (GO:0020037)	Cytochrome P450 (IPR001128)
196	Os02t0173100-02	Similar to cytochrome P450.	chr02	3996161	4002659	+	Biological Process: oxidation-reduction process (GO:0055114), Molecular Function: iron ion binding (GO:0005506), Molecular Function: electron carrier activity (GO:0009055), Molecular Function: oxidoreductase activity, acting on paired donors, with incorporation or reduction of molecular oxygen (GO:0016705), Molecular Function: heme binding (GO:0020037)	Cytochrome P450 (IPR001128), Cytochrome P450, E-class, group I (IPR002401), Cytochrome P450, conserved site (IPR017972)
197	Os02t0173100-03	Similar to Cytochrome P450 97B3 (EC 1.14.-.-).	chr02	3996431	4002659	+	Biological Process: oxidation-reduction process (GO:0055114), Molecular Function: iron ion binding (GO:0005506), Molecular Function: electron carrier activity (GO:0009055), Molecular Function: oxidoreductase activity, acting on paired donors, with incorporation or reduction of molecular oxygen (GO:0016705), Molecular Function: heme binding (GO:0020037)	Cytochrome P450 (IPR001128)
198	Os02t0173100-04	Similar to cDNA clone:J013071M18, full insert sequence.	chr02	3998988	4002696	+	Biological Process: oxidation-reduction process (GO:0055114), Molecular Function: iron ion binding (GO:0005506), Molecular Function: electron carrier activity (GO:0009055), Molecular Function: oxidoreductase activity, acting on paired donors, with incorporation or reduction of molecular oxygen (GO:0016705), Molecular Function: heme binding (GO:0020037)	Cytochrome P450 (IPR001128), Cytochrome P450, E-class, group I (IPR002401), Cytochrome P450, conserved site (IPR017972)
199	Os02t0173200-01	VQ domain containing protein.	chr02	4008991	4010136	+	NONE	VQ (IPR008889)
200	Os02t0173300-01	Conserved hypothetical protein.	chr02	4014563	4015313	+	NONE	NONE
201	Os02t0173401-00	Hypothetical conserved gene.	chr02	4014845	4015186	-	NONE	NONE
202	Os02t0173500-01	Similar to Cholinephosphate cytidylyltransferase.	chr02	4024691	4028669	+	Biological Process: biosynthetic process (GO:0009058), Molecular Function: catalytic activity (GO:0003824), Molecular Function: nucleotidyltransferase activity (GO:0016779)	Cytidylyltransferase (IPR004820), Cytidyltransferase-related (IPR004821), Rossmann-like alpha/beta/alpha sandwich fold (IPR014729)
203	Os02t0173600-01	Similar to Dreg-2 like protein.	chr02	4030968	4032592	+	NONE	NONE
204	Os02t0173650-00	Hypothetical protein.	chr02	4033225	4033494	-	NONE	NONE
205	Os02t0173700-01	Similar to RNA binding.	chr02	4035328	4038406	+	Molecular Function: methyltransferase activity (GO:0008168)	S-adenosylmethionine-dependent methyltransferase (IPR019614)
206	Os02t0173800-01	Protein of unknown function DUF284, transmembrane eukaryotic family protein.	chr02	4038445	4042357	-	Cellular Component: membrane (GO:0016020)	Protein of unknown function DUF284, transmembrane eukaryotic (IPR005045)
207	Os02t0173900-01	Similar to SSADH.	chr02	4044609	4052188	+	Biological Process: metabolic process (GO:0008152), Biological Process: oxidation-reduction process (GO:0055114), Molecular Function: oxidoreductase activity (GO:0016491)	Aldehyde dehydrogenase domain (IPR015590), Aldehyde/histidinol dehydrogenase (IPR016161), Aldehyde dehydrogenase, N-terminal (IPR016162)
208	Os02t0174000-00	Myb-like DNA-binding domain, SHAQKYF class domain containing protein.	chr02	4058194	4060315	-	Biological Process: regulation of transcription, DNA-dependent (GO:0006355), Molecular Function: DNA binding (GO:0003677), Molecular Function: protein binding (GO:0005515)	Myb-like DNA-binding domain, SHAQKYF class (IPR006447), Homeodomain-like (IPR009057), Homeodomain-related (IPR012287), Myb, DNA-binding (IPR014778), Transcription regulator HTH, Myb-type, DNA-binding (IPR017930)
209	Os02t0174100-01	Similar to Isoform 2 of Squamosa promoter-binding-like protein 4.	chr02	4073883	4077949	+	Cellular Component: nucleus (GO:0005634), Molecular Function: DNA binding (GO:0003677)	Transcription factor, SBP-box (IPR004333)
210	Os02t0174100-02	SBP domain containing protein.	chr02	4073890	4077831	+	Cellular Component: nucleus (GO:0005634), Molecular Function: DNA binding (GO:0003677)	Transcription factor, SBP-box (IPR004333)
211	Os02t0174100-03	Similar to Isoform 2 of Squamosa promoter-binding-like protein 4.	chr02	4073926	4074397	+	Cellular Component: nucleus (GO:0005634), Molecular Function: DNA binding (GO:0003677)	Transcription factor, SBP-box (IPR004333)
212	Os02t0174200-01	ATMRK serine/threonine protein kinase-like domain containing protein.	chr02	4078521	4081527	-	Biological Process: protein phosphorylation (GO:0006468), Molecular Function: protein kinase activity (GO:0004672), Molecular Function: protein serine/threonine kinase activity (GO:0004674), Molecular Function: protein tyrosine kinase activity (GO:0004713), Molecular Function: ATP binding (GO:0005524), Molecular Function: transferase activity, transferring phosphorus-containing groups (GO:0016772)	Protein kinase, catalytic domain (IPR000719), Serine-threonine/tyrosine-protein kinase (IPR001245), Serine/threonine-protein kinase, catalytic domain (IPR002290), Serine/threonine-protein kinase, active site (IPR008271), Protein kinase-like domain (IPR011009), Tyrosine-protein kinase, catalytic domain (IPR020635)
213	Os02t0174250-00	Hypothetical protein.	chr02	4078718	4080739	+	NONE	NONE
214	Os02t0174300-00	Hypothetical conserved gene.	chr02	4083023	4085633	+	NONE	MYB-like (IPR017877)
215	Os02t0174400-00	Protein kinase, catalytic domain domain containing protein.	chr02	4086325	4089165	+	Biological Process: protein phosphorylation (GO:0006468), Molecular Function: protein kinase activity (GO:0004672), Molecular Function: protein serine/threonine kinase activity (GO:0004674), Molecular Function: protein tyrosine kinase activity (GO:0004713), Molecular Function: ATP binding (GO:0005524), Molecular Function: transferase activity, transferring phosphorus-containing groups (GO:0016772)	Protein kinase, catalytic domain (IPR000719), Serine/threonine-protein kinase, catalytic domain (IPR002290), Protein kinase-like domain (IPR011009), Serine/threonine-protein kinase-like domain (IPR017442), Tyrosine-protein kinase, catalytic domain (IPR020635)
216	Os02t0174500-01	Hypothetical gene.	chr02	4090195	4093418	+	NONE	NONE
217	Os02t0174700-01	Hypothetical protein.	chr02	4095629	4099533	-	NONE	NONE
218	Os02t0174800-01	Protein of unknown function DUF581 family protein.	chr02	4095841	4097972	+	NONE	Protein of unknown function DUF581 (IPR007650)
219	Os02t0174900-01	Hypothetical gene.	chr02	4103333	4106241	-	NONE	NONE
220	Os02t0175000-01	Ion transporter , Na+ transport	chr02	4103387	4105657	+	Biological Process: cation transport (GO:0006812), Biological Process: transmembrane transport (GO:0055085), Molecular Function: cation transmembrane transporter activity (GO:0008324)	Cation transporter (IPR003445)
221	Os02t0175100-01	Similar to RISBZ4.	chr02	4109810	4112679	+	Biological Process: regulation of transcription, DNA-dependent (GO:0006355), Molecular Function: sequence-specific DNA binding transcription factor activity (GO:0003700), Molecular Function: sequence-specific DNA binding (GO:0043565), Molecular Function: protein dimerization activity (GO:0046983)	Basic-leucine zipper (bZIP) transcription factor (IPR004827), bZIP transcription factor, bZIP-1 (IPR011616)
222	Os02t0175200-00	Domain of unknown function DUF632 domain containing protein.	chr02	4112948	4113895	-	NONE	Domain of unknown function DUF632 (IPR006867)
223	Os02t0175250-00	Hypothetical protein.	chr02	4113678	4114097	+	NONE	NONE
224	Os02t0175301-00	Domain of unknown function DUF632 domain containing protein.	chr02	4113940	4115856	-	NONE	Domain of unknown function DUF632 (IPR006867), Domain of unknown function DUF630 (IPR006868)
225	Os02t0175400-01	Similar to Vacuolar H(+)-ATPase subunit A (Fragment).	chr02	4120173	4127533	+	Biological Process: ATP hydrolysis coupled proton transport (GO:0015991), Biological Process: proton transport (GO:0015992), Biological Process: ATP metabolic process (GO:0046034), Cellular Component: proton-transporting two-sector ATPase complex (GO:0016469), Cellular Component: proton-transporting two-sector ATPase complex, catalytic domain (GO:0033178), Cellular Component: proton-transporting …	ATPase, F1/V1/A1 complex, alpha/beta subunit, nucleotide-binding domain (IPR000194), ATPase, F1/V1/A1 complex, alpha/beta subunit, C-terminal (IPR000793), ATPase, F1/V1/A1 complex, alpha/beta subunit, N-terminal (IPR004100), ATPase, V1 complex, subunit A (IPR005725), ATPase, F1/A1 complex, alpha/beta subunit, N-terminal (IPR018118), ATPase, alpha/beta subunit, nucleotide-binding domain, active si…
226	Os02t0175500-01	Protein of unknown function DUF266, plant family protein.	chr02	4129142	4133817	+	Cellular Component: membrane (GO:0016020), Molecular Function: acetylglucosaminyltransferase activity (GO:0008375)	Glycosyl transferase, family 14 (IPR003406)
227	Os02t0175600-01	Similar to 60S ribosomal protein L27a (Fragment).	chr02	4134903	4135628	+	Biological Process: translation (GO:0006412), Cellular Component: intracellular (GO:0005622), Cellular Component: ribosome (GO:0005840), Molecular Function: structural constituent of ribosome (GO:0003735)	Ribosomal protein L15, conserved site (IPR001196), Ribosomal protein L18e/L15P (IPR021131)
228	Os02t0175700-01	Epsin-like, N-terminal domain containing protein.	chr02	4135897	4140382	-	Biological Process: clathrin coat assembly (GO:0048268), Cellular Component: clathrin coat (GO:0030118), Molecular Function: phospholipid binding (GO:0005543), Molecular Function: 1-phosphatidylinositol binding (GO:0005545), Molecular Function: clathrin binding (GO:0030276)	ENTH/VHS (IPR008942), ANTH (IPR011417), Epsin-like, N-terminal (IPR013809), Clathrin adaptor, phosphoinositide-binding, GAT-like (IPR014712)
229	Os02t0175750-00	Hypothetical protein.	chr02	4136117	4136595	+	NONE	NONE
230	Os02t0175800-01	Similar to fiber protein Fb15.	chr02	4141509	4143652	+	NONE	NONE
231	Os02t0175800-02	Similar to fiber protein Fb15.	chr02	4141550	4143528	+	NONE	NONE
232	Os02t0175850-00	Non-protein coding transcript.	chr02	4143281	4143494	-	NONE	NONE
233	Os02t0175900-01	Mitotic checkpoint protein PRCC, C-terminal domain containing protein.	chr02	4144343	4147044	-	NONE	Mitotic checkpoint protein PRCC, C-terminal (IPR018800)
234	Os02t0175900-02	Mitotic checkpoint protein PRCC, C-terminal domain containing protein.	chr02	4144358	4147007	-	NONE	Mitotic checkpoint protein PRCC, C-terminal (IPR018800)
235	Os02t0175950-00	Non-protein coding transcript.	chr02	4150163	4150271	-	NONE	NONE
236	Os02t0176000-00	Zinc finger, B-box domain containing protein.	chr02	4150302	4150970	-	Cellular Component: intracellular (GO:0005622), Molecular Function: zinc ion binding (GO:0008270)	Zinc finger, B-box (IPR000315)
237	Os02t0176100-03	Similar to predicted protein.	chr02	4165207	4170723	-	Biological Process: protein phosphorylation (GO:0006468), Molecular Function: protein kinase activity (GO:0004672), Molecular Function: protein serine/threonine kinase activity (GO:0004674), Molecular Function: protein tyrosine kinase activity (GO:0004713), Molecular Function: ATP binding (GO:0005524), Molecular Function: transferase activity, transferring phosphorus-containing groups (GO:0016772)	Protein kinase, catalytic domain (IPR000719), Serine-threonine/tyrosine-protein kinase (IPR001245), Serine/threonine-protein kinase, catalytic domain (IPR002290), Protein kinase-like domain (IPR011009), Tyrosine-protein kinase, catalytic domain (IPR020635)
238	Os02t0176100-02	Protein kinase-like domain containing protein.	chr02	4167835	4175024	-	Biological Process: protein phosphorylation (GO:0006468), Molecular Function: protein kinase activity (GO:0004672), Molecular Function: protein binding (GO:0005515), Molecular Function: ATP binding (GO:0005524), Molecular Function: transferase activity, transferring phosphorus-containing groups (GO:0016772)	Protein kinase, catalytic domain (IPR000719), Serine-threonine/tyrosine-protein kinase (IPR001245), Leucine-rich repeat (IPR001611), Protein kinase-like domain (IPR011009)
239	Os02t0176100-01	Similar to predicted protein.	chr02	4170565	4175212	-	Biological Process: protein phosphorylation (GO:0006468), Molecular Function: protein kinase activity (GO:0004672), Molecular Function: protein binding (GO:0005515), Molecular Function: ATP binding (GO:0005524), Molecular Function: transferase activity, transferring phosphorus-containing groups (GO:0016772)	Protein kinase, catalytic domain (IPR000719), Serine-threonine/tyrosine-protein kinase (IPR001245), Leucine-rich repeat (IPR001611), Protein kinase-like domain (IPR011009)
240	Os02t0176300-01	Hypothetical protein.	chr02	4182680	4184658	+	NONE	NONE
241	Os02t0176400-01	Uncharacterised protein family UPF0414 domain containing protein.	chr02	4184309	4185807	-	NONE	Protein of unknown function DUF872, transmembrane (IPR008590)
242	Os02t0176650-01	Non-protein coding transcript.	chr02	4195529	4195944	-	NONE	NONE
243	Os02t0176700-00	Similar to autoinhibited calcium ATPase.	chr02	4196026	4208370	-	Biological Process: ATP biosynthetic process (GO:0006754), Biological Process: cation transport (GO:0006812), Biological Process: metabolic process (GO:0008152), Biological Process: calcium ion transmembrane transport (GO:0070588), Cellular Component: membrane (GO:0016020), Molecular Function: nucleotide binding (GO:0000166), Molecular Function: catalytic activity (GO:0003824), Molecular Function…	ATPase, P-type, H+ transporting proton pump (IPR000695), ATPase, P-type, K/Mg/Cd/Cu/Zn/Na/Ca/Na/H-transporter (IPR001757), ATPase, P-type cation-transporter, N-terminal (IPR004014), Haloacid dehalogenase-like hydrolase (IPR005834), ATPase, P-type cation-transporter, C-terminal (IPR006068), ATPase, P-type, calcium-transporting, PMCA-type (IPR006408), ATPase, P-type, ATPase-associated domain (IPR00…
244	Os02t0176900-00	Similar to apospory-associated protein C.	chr02	4220950	4223647	-	Biological Process: carbohydrate metabolic process (GO:0005975), Molecular Function: catalytic activity (GO:0003824), Molecular Function: isomerase activity (GO:0016853), Molecular Function: carbohydrate binding (GO:0030246)	Aldose 1-epimerase (IPR008183), Glycoside hydrolase-type carbohydrate-binding (IPR011013), Glycoside hydrolase-type carbohydrate-binding, subgroup (IPR014718)
245	Os02t0177300-00	Squamosa-promoter binding protein 1.	chr02	4247435	4251025	+	Cellular Component: nucleus (GO:0005634), Molecular Function: DNA binding (GO:0003677)	Transcription factor, SBP-box (IPR004333)
246	Os02t0177400-01	Conserved hypothetical protein.	chr02	4264389	4268820	-	NONE	NONE
247	Os02t0177500-01	Similar to Small nuclear ribonucleoprotein F (snRNP-F) (Sm protein F) (Sm-F) (SmF).	chr02	4270620	4274199	-	Biological Process: RNA processing (GO:0006396), Cellular Component: nucleus (GO:0005634)	Like-Sm ribonucleoprotein (LSM) domain (IPR001163), Like-Sm ribonucleoprotein (LSM) domain, eukaryotic/archaea-type (IPR006649), Like-Sm ribonucleoprotein (LSM)-related domain (IPR010920), Small nuclear ribonucleoprotein SmF (IPR016487)
					1392022
					1392.02
